# Supplementary material for: Transcriptional Profiling of the Dose Response: A More Powerful Approach for Characterizing Drug Activities
Source: PLOS journal article supplement (doi:10.1371/journal.pcbi.1000512), 2009-09-18
Supplement: S1 (10.1371/journal.pcbi.1000512.s001) [file journal.pcbi.1000512.s001]

301 Moved Permanently

# Moved Permanently

The document has moved here.

---

Apache Server at www.ploscompbiol.org Port 80
