# Supplementary material for: Transcriptional Profiling of the Dose Response: A More Powerful Approach for Characterizing Drug Activities
Source: PLoS Comput Biol. 2009 Sep 18;5(9):e1000512. doi: 10.1371/journal.pcbi.1000512 (PMC2735650; doi:10.1371/journal.pcbi.1000512)
Supplement: Table S1 — XLfit comparison (5.98 MB XLS) [file pcbi.1000512.s002.xls]

## Sheet: dataFitInfo
___FRImatinib 4 hour data!E2478	___GDImatinib 4 hour data!E2478	___FRImatinib 4 hour data!E2489	___GDImatinib 4 hour data!E2489	___FRImatinib 4 hour data!E2500	___GDImatinib 4 hour data!E2500	___FRImatinib 4 hour data!E2511	___GDImatinib 4 hour data!E2511	___FRImatinib 4 hour data!E2522	___GDImatinib 4 hour data!E2522	___FRImatinib 4 hour data!E2533	___GDImatinib 4 hour data!E2533	___FRImatinib 4 hour data!E2544	___GDImatinib 4 hour data!E2544	___FRImatinib 4 hour data!E2555	___GDImatinib 4 hour data!E2555	___FRImatinib 4 hour data!E2566	___GDImatinib 4 hour data!E2566	___FRImatinib 4 hour data!E2577	___GDImatinib 4 hour data!E2577	___FRImatinib 4 hour data!E2588	___GDImatinib 4 hour data!E2588	___FRImatinib 4 hour data!E2599	___GDImatinib 4 hour data!E2599	___FRImatinib 4 hour data!E2610	___GDImatinib 4 hour data!E2610	___FRImatinib 4 hour data!E2621	___GDImatinib 4 hour data!E2621	___FRImatinib 4 hour data!E2632	___GDImatinib 4 hour data!E2632	___FRImatinib 4 hour data!E2643	___GDImatinib 4 hour data!E2643	___FRImatinib 4 hour data!E2654	___GDImatinib 4 hour data!E2654	___FRImatinib 4 hour data!E2665	___GDImatinib 4 hour data!E2665	___FRImatinib 4 hour data!E2676	___GDImatinib 4 hour data!E2676	___FRImatinib 4 hour data!E2687	___GDImatinib 4 hour data!E2687	___FRImatinib 4 hour data!E2698	___GDImatinib 4 hour data!E2698	___FRImatinib 4 hour data!E2720	___GDImatinib 4 hour data!E2720	___FRImatinib 4 hour data!E2479	___GDImatinib 4 hour data!E2479	___FRImatinib 4 hour data!E2501	___GDImatinib 4 hour data!E2501	___FRImatinib 4 hour data!E2512	___GDImatinib 4 hour data!E2512
__FIFitSucessful	__FIReturnInfoCode	__FIFitSucessful	__FIReturnInfoCode	__FIFitSucessful	__FIReturnInfoCode	__FIFitSucessful	__FIReturnInfoCode	__FIFitSucessful	__FIReturnInfoCode	__FIFitSucessful	__FIReturnInfoCode	__FIFitSucessful	__FIReturnInfoCode	__FIFitSucessful	__FIReturnInfoCode	__FIFitSucessful	__FIReturnInfoCode	__FIFitSucessful	__FIReturnInfoCode	__FIFitSucessful	__FIReturnInfoCode	__FIFitSucessful	__FIReturnInfoCode	__FIFitSucessful	__FIReturnInfoCode	__FIFitSucessful	__FIReturnInfoCode	__FIFitSucessful	__FIReturnInfoCode	__FIFitSucessful	__FIReturnInfoCode	__FIFitSucessful	__FIReturnInfoCode	__FIFitSucessful	__FIReturnInfoCode	__FIFitSucessful	__FIReturnInfoCode	__FIFitSucessful	__FIReturnInfoCode	__FIFitSucessful	__FIReturnInfoCode	__FIFitSucessful	__FIReturnInfoCode	__FIFitSucessful	__FIReturnInfoCode	__FIFitSucessful	__FIReturnInfoCode	__FIFitSucessful	__FIReturnInfoCode
0	0	0	0	0	0	0	0	0	0	0	0	0	0	0	0	0	0	0	0	0	0	0	0	0	0	0	0	0	0	0	0	0	0	0	0	1	0	1	0	1	0	1	0	0	0	0	0	0	0
__FIResult	__FIGraphTitle	__FIResult	__FIGraphTitle	__FIResult	__FIGraphTitle	__FIResult	__FIGraphTitle	__FIResult	__FIGraphTitle	__FIResult	__FIGraphTitle	__FIResult	__FIGraphTitle	__FIResult	__FIGraphTitle	__FIResult	__FIGraphTitle	__FIResult	__FIGraphTitle	__FIResult	__FIGraphTitle	__FIResult	__FIGraphTitle	__FIResult	__FIGraphTitle	__FIResult	__FIGraphTitle	__FIResult	__FIGraphTitle	__FIResult	__FIGraphTitle	__FIResult	__FIGraphTitle	__FIResult	__FIGraphTitle	__FIResult	__FIGraphTitle	__FIResult	__FIGraphTitle	__FIResult	__FIGraphTitle	__FIResult	__FIGraphTitle	__FIResult	__FIGraphTitle	__FIResult	__FIGraphTitle	__FIResult	__FIGraphTitle
#NoFit!	____FI__NULLVALUE	#NoFit!	____FI__NULLVALUE	#NoFit!	____FI__NULLVALUE	#NoFit!	____FI__NULLVALUE	#NoFit!	____FI__NULLVALUE	#NoFit!	____FI__NULLVALUE	#NoFit!	____FI__NULLVALUE	#NoFit!	____FI__NULLVALUE	#NoFit!	____FI__NULLVALUE	#NoFit!	____FI__NULLVALUE	#NoFit!	____FI__NULLVALUE	#NoFit!	____FI__NULLVALUE	#NoFit!	____FI__NULLVALUE	#NoFit!	____FI__NULLVALUE	#NoFit!	____FI__NULLVALUE	#NoFit!	____FI__NULLVALUE	#NoFit!	____FI__NULLVALUE	#NoFit!	____FI__NULLVALUE	#Ok!	____FI__NULLVALUE	#Ok!	____FI__NULLVALUE	#Ok!	____FI__NULLVALUE	#Ok!	____FI__NULLVALUE	#NoFit!	____FI__NULLVALUE	#NoFit!	____FI__NULLVALUE	#NoFit!	____FI__NULLVALUE
__FINumDataPoints	__FIDataTitle	__FINumDataPoints	__FIDataTitle	__FINumDataPoints	__FIDataTitle	__FINumDataPoints	__FIDataTitle	__FINumDataPoints	__FIDataTitle	__FINumDataPoints	__FIDataTitle	__FINumDataPoints	__FIDataTitle	__FINumDataPoints	__FIDataTitle	__FINumDataPoints	__FIDataTitle	__FINumDataPoints	__FIDataTitle	__FINumDataPoints	__FIDataTitle	__FINumDataPoints	__FIDataTitle	__FINumDataPoints	__FIDataTitle	__FINumDataPoints	__FIDataTitle	__FINumDataPoints	__FIDataTitle	__FINumDataPoints	__FIDataTitle	__FINumDataPoints	__FIDataTitle	__FINumDataPoints	__FIDataTitle	__FINumDataPoints	__FIDataTitle	__FINumDataPoints	__FIDataTitle	__FINumDataPoints	__FIDataTitle	__FINumDataPoints	__FIDataTitle	__FINumDataPoints	__FIDataTitle	__FINumDataPoints	__FIDataTitle	__FINumDataPoints	__FIDataTitle
13	____FI__NULLVALUE	13	____FI__NULLVALUE	13	____FI__NULLVALUE	13	____FI__NULLVALUE	13	____FI__NULLVALUE	13	____FI__NULLVALUE	13	____FI__NULLVALUE	13	____FI__NULLVALUE	13	____FI__NULLVALUE	13	____FI__NULLVALUE	13	____FI__NULLVALUE	13	____FI__NULLVALUE	13	____FI__NULLVALUE	13	____FI__NULLVALUE	13	____FI__NULLVALUE	13	____FI__NULLVALUE	13	____FI__NULLVALUE	13	____FI__NULLVALUE	13	____FI__NULLVALUE	13	____FI__NULLVALUE	13	____FI__NULLVALUE	13	____FI__NULLVALUE	13	____FI__NULLVALUE	13	____FI__NULLVALUE	13	____FI__NULLVALUE
__FIModelNumber	__FILabelX	__FIModelNumber	__FILabelX	__FIModelNumber	__FILabelX	__FIModelNumber	__FILabelX	__FIModelNumber	__FILabelX	__FIModelNumber	__FILabelX	__FIModelNumber	__FILabelX	__FIModelNumber	__FILabelX	__FIModelNumber	__FILabelX	__FIModelNumber	__FILabelX	__FIModelNumber	__FILabelX	__FIModelNumber	__FILabelX	__FIModelNumber	__FILabelX	__FIModelNumber	__FILabelX	__FIModelNumber	__FILabelX	__FIModelNumber	__FILabelX	__FIModelNumber	__FILabelX	__FIModelNumber	__FILabelX	__FIModelNumber	__FILabelX	__FIModelNumber	__FILabelX	__FIModelNumber	__FILabelX	__FIModelNumber	__FILabelX	__FIModelNumber	__FILabelX	__FIModelNumber	__FILabelX	__FIModelNumber	__FILabelX
201	____FI__NULLVALUE	201	____FI__NULLVALUE	201	____FI__NULLVALUE	201	____FI__NULLVALUE	201	____FI__NULLVALUE	201	____FI__NULLVALUE	201	____FI__NULLVALUE	201	____FI__NULLVALUE	201	____FI__NULLVALUE	201	____FI__NULLVALUE	201	____FI__NULLVALUE	201	____FI__NULLVALUE	201	____FI__NULLVALUE	201	____FI__NULLVALUE	201	____FI__NULLVALUE	201	____FI__NULLVALUE	201	____FI__NULLVALUE	201	____FI__NULLVALUE	201	____FI__NULLVALUE	201	____FI__NULLVALUE	201	____FI__NULLVALUE	201	____FI__NULLVALUE	201	____FI__NULLVALUE	201	____FI__NULLVALUE	201	____FI__NULLVALUE
__FIKnownX	__FILabelY	__FIKnownX	__FILabelY	__FIKnownX	__FILabelY	__FIKnownX	__FILabelY	__FIKnownX	__FILabelY	__FIKnownX	__FILabelY	__FIKnownX	__FILabelY	__FIKnownX	__FILabelY	__FIKnownX	__FILabelY	__FIKnownX	__FILabelY	__FIKnownX	__FILabelY	__FIKnownX	__FILabelY	__FIKnownX	__FILabelY	__FIKnownX	__FILabelY	__FIKnownX	__FILabelY	__FIKnownX	__FILabelY	__FIKnownX	__FILabelY	__FIKnownX	__FILabelY	__FIKnownX	__FILabelY	__FIKnownX	__FILabelY	__FIKnownX	__FILabelY	__FIKnownX	__FILabelY	__FIKnownX	__FILabelY	__FIKnownX	__FILabelY	__FIKnownX	__FILabelY
0	____FI__NULLVALUE	0	____FI__NULLVALUE	0	____FI__NULLVALUE	0	____FI__NULLVALUE	0	____FI__NULLVALUE	0	____FI__NULLVALUE	0	____FI__NULLVALUE	0	____FI__NULLVALUE	0	____FI__NULLVALUE	0	____FI__NULLVALUE	0	____FI__NULLVALUE	0	____FI__NULLVALUE	0	____FI__NULLVALUE	0	____FI__NULLVALUE	0	____FI__NULLVALUE	0	____FI__NULLVALUE	0	____FI__NULLVALUE	0	____FI__NULLVALUE	0	____FI__NULLVALUE	0	____FI__NULLVALUE	0	____FI__NULLVALUE	0	____FI__NULLVALUE	0	____FI__NULLVALUE	0	____FI__NULLVALUE	0	____FI__NULLVALUE
0.17	__FIKnownXRange	0.17	__FIKnownXRange	0.17	__FIKnownXRange	0.17	__FIKnownXRange	0.17	__FIKnownXRange	0.17	__FIKnownXRange	0.17	__FIKnownXRange	0.17	__FIKnownXRange	0.17	__FIKnownXRange	0.17	__FIKnownXRange	0.17	__FIKnownXRange	0.17	__FIKnownXRange	0.17	__FIKnownXRange	0.17	__FIKnownXRange	0.17	__FIKnownXRange	0.17	__FIKnownXRange	0.17	__FIKnownXRange	0.17	__FIKnownXRange	0.17	__FIKnownXRange	0.17	__FIKnownXRange	0.17	__FIKnownXRange	0.17	__FIKnownXRange	0.17	__FIKnownXRange	0.17	__FIKnownXRange	0.17	__FIKnownXRange
0.5	Imatinib 4 hour data	0.5	Imatinib 4 hour data	0.5	Imatinib 4 hour data	0.5	Imatinib 4 hour data	0.5	Imatinib 4 hour data	0.5	Imatinib 4 hour data	0.5	Imatinib 4 hour data	0.5	Imatinib 4 hour data	0.5	Imatinib 4 hour data	0.5	Imatinib 4 hour data	0.5	Imatinib 4 hour data	0.5	Imatinib 4 hour data	0.5	Imatinib 4 hour data	0.5	Imatinib 4 hour data	0.5	Imatinib 4 hour data	0.5	Imatinib 4 hour data	0.5	Imatinib 4 hour data	0.5	Imatinib 4 hour data	0.5	Imatinib 4 hour data	0.5	Imatinib 4 hour data	0.5	Imatinib 4 hour data	0.5	Imatinib 4 hour data	0.5	Imatinib 4 hour data	0.5	Imatinib 4 hour data	0.5	Imatinib 4 hour data
1.5	1	1.5	1	1.5	1	1.5	1	1.5	1	1.5	1	1.5	1	1.5	1	1.5	1	1.5	1	1.5	1	1.5	1	1.5	1	1.5	1	1.5	1	1.5	1	1.5	1	1.5	1	1.5	1	1.5	1	1.5	1	1.5	1	1.5	1	1.5	1	1.5	1
4.5	1	4.5	1	4.5	1	4.5	1	4.5	1	4.5	1	4.5	1	4.5	1	4.5	1	4.5	1	4.5	1	4.5	1	4.5	1	4.5	1	4.5	1	4.5	1	4.5	1	4.5	1	4.5	1	4.5	1	4.5	1	4.5	1	4.5	1	4.5	1	4.5	1
13.7	9	13.7	9	13.7	9	13.7	9	13.7	9	13.7	9	13.7	9	13.7	9	13.7	9	13.7	9	13.7	9	13.7	9	13.7	9	13.7	9	13.7	9	13.7	9	13.7	9	13.7	9	13.7	9	13.7	9	13.7	9	13.7	9	13.7	9	13.7	9	13.7	9
41.2	21	41.2	21	41.2	21	41.2	21	41.2	21	41.2	21	41.2	21	41.2	21	41.2	21	41.2	21	41.2	21	41.2	21	41.2	21	41.2	21	41.2	21	41.2	21	41.2	21	41.2	21	41.2	21	41.2	21	41.2	21	41.2	21	41.2	21	41.2	21	41.2	21
123.5	1	123.5	1	123.5	1	123.5	1	123.5	1	123.5	1	123.5	1	123.5	1	123.5	1	123.5	1	123.5	1	123.5	1	123.5	1	123.5	1	123.5	1	123.5	1	123.5	1	123.5	1	123.5	1	123.5	1	123.5	1	123.5	1	123.5	1	123.5	1	123.5	1
370.4	__FIKnownYRange	370.4	__FIKnownYRange	370.4	__FIKnownYRange	370.4	__FIKnownYRange	370.4	__FIKnownYRange	370.4	__FIKnownYRange	370.4	__FIKnownYRange	370.4	__FIKnownYRange	370.4	__FIKnownYRange	370.4	__FIKnownYRange	370.4	__FIKnownYRange	370.4	__FIKnownYRange	370.4	__FIKnownYRange	370.4	__FIKnownYRange	370.4	__FIKnownYRange	370.4	__FIKnownYRange	370.4	__FIKnownYRange	370.4	__FIKnownYRange	370.4	__FIKnownYRange	370.4	__FIKnownYRange	370.4	__FIKnownYRange	370.4	__FIKnownYRange	370.4	__FIKnownYRange	370.4	__FIKnownYRange	370.4	__FIKnownYRange
1111	Imatinib 4 hour data	1111	Imatinib 4 hour data	1111	Imatinib 4 hour data	1111	Imatinib 4 hour data	1111	Imatinib 4 hour data	1111	Imatinib 4 hour data	1111	Imatinib 4 hour data	1111	Imatinib 4 hour data	1111	Imatinib 4 hour data	1111	Imatinib 4 hour data	1111	Imatinib 4 hour data	1111	Imatinib 4 hour data	1111	Imatinib 4 hour data	1111	Imatinib 4 hour data	1111	Imatinib 4 hour data	1111	Imatinib 4 hour data	1111	Imatinib 4 hour data	1111	Imatinib 4 hour data	1111	Imatinib 4 hour data	1111	Imatinib 4 hour data	1111	Imatinib 4 hour data	1111	Imatinib 4 hour data	1111	Imatinib 4 hour data	1111	Imatinib 4 hour data	1111	Imatinib 4 hour data
3333	2477	3333	2488	3333	2499	3333	2510	3333	2521	3333	2532	3333	2543	3333	2554	3333	2565	3333	2576	3333	2587	3333	2598	3333	2609	3333	2620	3333	2631	3333	2642	3333	2653	3333	2664	3333	2675	3333	2686	3333	2697	3333	2719	3333	2478	3333	2500	3333	2511
10000	2477	10000	2488	10000	2499	10000	2510	10000	2521	10000	2532	10000	2543	10000	2554	10000	2565	10000	2576	10000	2587	10000	2598	10000	2609	10000	2620	10000	2631	10000	2642	10000	2653	10000	2664	10000	2675	10000	2686	10000	2697	10000	2719	10000	2478	10000	2500	10000	2511
30000	9	30000	9	30000	9	30000	9	30000	9	30000	9	30000	9	30000	9	30000	9	30000	9	30000	9	30000	9	30000	9	30000	9	30000	9	30000	9	30000	9	30000	9	30000	9	30000	9	30000	9	30000	9	30000	9	30000	9	30000	9
__FIKnownY	21	__FIKnownY	21	__FIKnownY	21	__FIKnownY	21	__FIKnownY	21	__FIKnownY	21	__FIKnownY	21	__FIKnownY	21	__FIKnownY	21	__FIKnownY	21	__FIKnownY	21	__FIKnownY	21	__FIKnownY	21	__FIKnownY	21	__FIKnownY	21	__FIKnownY	21	__FIKnownY	21	__FIKnownY	21	__FIKnownY	21	__FIKnownY	21	__FIKnownY	21	__FIKnownY	21	__FIKnownY	21	__FIKnownY	21	__FIKnownY	21
185.78	1	1906.15	1	1344.33	1	552.14	1	9874.94	1	213.08	1	70.45	1	79.16	1	62.11	1	70.14	1	193.34	1	277.22	1	93.57	1	237.61	1	71.45	1	181.52	1	2182.18	1	74.44	1	252.73	1	144.05	1	88.76	1	71.75	1	92.53	1	215.02	1	22814.5	1
176.56	__FIError	1892.4	__FIError	1470.41	__FIError	595.52	__FIError	9823.35	__FIError	233.45	__FIError	67.98	__FIError	72.91	__FIError	63.87	__FIError	69.79	__FIError	206.5	__FIError	321.35	__FIError	86.7	__FIError	222.86	__FIError	68.69	__FIError	173.77	__FIError	2117.29	__FIError	74.75	__FIError	237.7	__FIError	142.32	__FIError	96.07	__FIError	70.13	__FIError	92.93	__FIError	215.87	__FIError	22195.8	__FIError
188.05	0	1712.63	0	1459.24	0	535.22	0	10162.7	0	200.71	0	65.89	0	75.43	0	61.52	0	72.61	0	193.74	0	267.06	0	90.32	0	229.6	0	68.17	0	151.27	0	2261.4	0	72.35	0	237.87	0	136.62	0	94.75	0	70.96	0	88.34	0	212.31	0	23299.3	0
176.8	0	1946.95	0	1384.36	0	516.99	0	9926.02	0	207.36	0	66.44	0	71.66	0	55.22	0	71.41	0	190.02	0	289.62	0	86.28	0	238.03	0	69.99	0	176.68	0	2207.2	0	70.52	0	234.59	0	164.39	0	98.22	0	70.77	0	87.31	0	231.68	0	22930.8	0
180.64	0	1784.12	0	1199.32	0	524.57	0	10162.7	0	180.77	0	67.04	0	80.23	0	61.69	0	71.8	0	193.07	0	269.29	0	93.38	0	246.6	0	72.61	0	170.66	0	2132.01	0	79.01	0	232.65	0	140.85	0	85.87	0	75.69	0	103.54	0	260.47	0	22756.6	0
192	0	2012.82	0	1429.21	0	530.42	0	9469.02	0	195.23	0	64.27	0	75.58	0	59.88	0	67.6	0	197.4	0	305.71	0	82.31	0	216.32	0	70.62	0	148.88	0	2413.65	0	73.06	0	236.71	0	158.79	0	108.16	0	65.57	0	86.4	0	231.84	0	22740.9	0
166	0	1787.84	0	1391.09	0	491.82	0	9701.55	0	209.82	0	64.94	0	76.53	0	64.49	0	70.47	0	174.13	0	279.36	0	88.59	0	227.7	0	68.59	0	167.27	0	2270.82	0	75.53	0	285.43	0	137.28	0	91.33	0	69.45	0	97.01	0	220.4	0	22740.9	0
164.85	0	1584.71	0	1376.7	0	496.28	0	9235.66	0	186.75	0	64	0	79.07	0	67.04	0	74.03	0	217.67	0	259.57	0	85.33	0	263.93	0	66.72	0	180.02	0	2127.58	0	80.17	0	278.59	0	131.14	0	94.62	0	80.17	0	102.47	0	217.82	0	22978.5	0
161.34	0	1734.13	0	1236.46	0	538.57	0	9932.91	0	227.23	0	67.84	0	83.81	0	76.74	0	62.55	0	194.42	0	263.75	0	96.67	0	230.24	0	63.56	0	174.49	0	2256.7	0	77.01	0	239.02	0	143.81	0	82.77	0	84.1	0	94.16	0	237.54	0	22042.5	0
180.64	0	1709.08	0	1442.14	0	507.41	0	9891.68	0	208.37	0	64.98	0	82.83	0	62.9	0	67	0	148.98	0	303.8	0	97.34	0	238.2	0	66.53	0	184.06	0	2107.04	0	73.67	0	237.54	0	136.52	0	86.46	0	72.66	0	92.6	0	237.37	0	22057.8	0
166.23	0	1655.44	0	1344.64	0	474.74	0	9775.81	0	196.99	0	68.07	0	83.63	0	68.93	0	66.35	0	196.72	0	249.52	0	91.58	0	252.48	0	65.89	0	179.15	0	2003.07	0	83.58	0	257.42	0	125.19	0	88.89	0	74.34	0	109.52	0	211.72	0	21981.5	0
175.83	0	1652	0	1479.61	0	530.06	0	9033.07	0	247.11	0	69.17	0	77.23	0	69.41	0	69.5	0	187.53	0	256.89	0	101.83	0	206.07	0	66.63	0	197.13	0	1980.98	0	79.29	0	250.21	0	148.78	0	81.8	0	69.41	0	101.62	0	260.11	0	22599.5	0
158.9	0	1759.56	0	1019.04	0	521.67	0	9051.87	0	252.83	0	73.67	0	84.92	0	82.37	0	63.34	0	124.67	0	199.33	0	96.2	0	191.47	0	69.5	0	200.99	0	2052.26	0	84.68	0	239.85	0	138.52	0	81.57	0	72.61	0	118.11	0	282.67	0	22119	0
__FIWeight	0	__FIWeight	0	__FIWeight	0	__FIWeight	0	__FIWeight	0	__FIWeight	0	__FIWeight	0	__FIWeight	0	__FIWeight	0	__FIWeight	0	__FIWeight	0	__FIWeight	0	__FIWeight	0	__FIWeight	0	__FIWeight	0	__FIWeight	0	__FIWeight	0	__FIWeight	0	__FIWeight	0	__FIWeight	0	__FIWeight	0	__FIWeight	0	__FIWeight	0	__FIWeight	0	__FIWeight	0
1	0	1	0	1	0	1	0	1	0	1	0	1	0	1	0	1	0	1	0	1	0	1	0	1	0	1	0	1	0	1	0	1	0	1	0	1	0	1	0	1	0	1	0	1	0	1	0	1	0
1	__FIParamReturnCell	1	__FIParamReturnCell	1	__FIParamReturnCell	1	__FIParamReturnCell	1	__FIParamReturnCell	1	__FIParamReturnCell	1	__FIParamReturnCell	1	__FIParamReturnCell	1	__FIParamReturnCell	1	__FIParamReturnCell	1	__FIParamReturnCell	1	__FIParamReturnCell	1	__FIParamReturnCell	1	__FIParamReturnCell	1	__FIParamReturnCell	1	__FIParamReturnCell	1	__FIParamReturnCell	1	__FIParamReturnCell	1	__FIParamReturnCell	1	__FIParamReturnCell	1	__FIParamReturnCell	1	__FIParamReturnCell	1	__FIParamReturnCell	1	__FIParamReturnCell	1	__FIParamReturnCell
1	____FI__NULLVALUE	1	____FI__NULLVALUE	1	____FI__NULLVALUE	1	____FI__NULLVALUE	1	____FI__NULLVALUE	1	____FI__NULLVALUE	1	____FI__NULLVALUE	1	____FI__NULLVALUE	1	____FI__NULLVALUE	1	____FI__NULLVALUE	1	____FI__NULLVALUE	1	____FI__NULLVALUE	1	____FI__NULLVALUE	1	____FI__NULLVALUE	1	____FI__NULLVALUE	1	____FI__NULLVALUE	1	____FI__NULLVALUE	1	____FI__NULLVALUE	1	____FI__NULLVALUE	1	____FI__NULLVALUE	1	____FI__NULLVALUE	1	____FI__NULLVALUE	1	____FI__NULLVALUE	1	____FI__NULLVALUE	1	____FI__NULLVALUE
1	____FI__NULLVALUE	1	____FI__NULLVALUE	1	____FI__NULLVALUE	1	____FI__NULLVALUE	1	____FI__NULLVALUE	1	____FI__NULLVALUE	1	____FI__NULLVALUE	1	____FI__NULLVALUE	1	____FI__NULLVALUE	1	____FI__NULLVALUE	1	____FI__NULLVALUE	1	____FI__NULLVALUE	1	____FI__NULLVALUE	1	____FI__NULLVALUE	1	____FI__NULLVALUE	1	____FI__NULLVALUE	1	____FI__NULLVALUE	1	____FI__NULLVALUE	1	____FI__NULLVALUE	1	____FI__NULLVALUE	1	____FI__NULLVALUE	1	____FI__NULLVALUE	1	____FI__NULLVALUE	1	____FI__NULLVALUE	1	____FI__NULLVALUE
1	____FI__NULLVALUE	1	____FI__NULLVALUE	1	____FI__NULLVALUE	1	____FI__NULLVALUE	1	____FI__NULLVALUE	1	____FI__NULLVALUE	1	____FI__NULLVALUE	1	____FI__NULLVALUE	1	____FI__NULLVALUE	1	____FI__NULLVALUE	1	____FI__NULLVALUE	1	____FI__NULLVALUE	1	____FI__NULLVALUE	1	____FI__NULLVALUE	1	____FI__NULLVALUE	1	____FI__NULLVALUE	1	____FI__NULLVALUE	1	____FI__NULLVALUE	1	____FI__NULLVALUE	1	____FI__NULLVALUE	1	____FI__NULLVALUE	1	____FI__NULLVALUE	1	____FI__NULLVALUE	1	____FI__NULLVALUE	1	____FI__NULLVALUE
1	____FI__NULLVALUE	1	____FI__NULLVALUE	1	____FI__NULLVALUE	1	____FI__NULLVALUE	1	____FI__NULLVALUE	1	____FI__NULLVALUE	1	____FI__NULLVALUE	1	____FI__NULLVALUE	1	____FI__NULLVALUE	1	____FI__NULLVALUE	1	____FI__NULLVALUE	1	____FI__NULLVALUE	1	____FI__NULLVALUE	1	____FI__NULLVALUE	1	____FI__NULLVALUE	1	____FI__NULLVALUE	1	____FI__NULLVALUE	1	____FI__NULLVALUE	1	____FI__NULLVALUE	1	____FI__NULLVALUE	1	____FI__NULLVALUE	1	____FI__NULLVALUE	1	____FI__NULLVALUE	1	____FI__NULLVALUE	1	____FI__NULLVALUE
1		1		1		1		1		1		1		1		1		1		1		1		1		1		1		1		1		1		1		1		1		1		1		1		1
1		1		1		1		1		1		1		1		1		1		1		1		1		1		1		1		1		1		1		1		1		1		1		1		1
1		1		1		1		1		1		1		1		1		1		1		1		1		1		1		1		1		1		1		1		1		1		1		1		1
1		1		1		1		1		1		1		1		1		1		1		1		1		1		1		1		1		1		1		1		1		1		1		1		1
1		1		1		1		1		1		1		1		1		1		1		1		1		1		1		1		1		1		1		1		1		1		1		1		1
1		1		1		1		1		1		1		1		1		1		1		1		1		1		1		1		1		1		1		1		1		1		1		1		1
1		1		1		1		1		1		1		1		1		1		1		1		1		1		1		1		1		1		1		1		1		1		1		1		1
__FIPointExcluded		__FIPointExcluded		__FIPointExcluded		__FIPointExcluded		__FIPointExcluded		__FIPointExcluded		__FIPointExcluded		__FIPointExcluded		__FIPointExcluded		__FIPointExcluded		__FIPointExcluded		__FIPointExcluded		__FIPointExcluded		__FIPointExcluded		__FIPointExcluded		__FIPointExcluded		__FIPointExcluded		__FIPointExcluded		__FIPointExcluded		__FIPointExcluded		__FIPointExcluded		__FIPointExcluded		__FIPointExcluded		__FIPointExcluded		__FIPointExcluded
0		0		0		0		0		0		0		0		0		0		0		0		0		0		0		0		0		0		0		0		0		0		0		0		0
0		0		0		0		0		0		0		0		0		0		0		0		0		0		0		0		0		0		0		0		0		0		0		0		0
0		0		0		0		0		0		0		0		0		0		0		0		0		0		0		0		0		0		0		0		0		0		0		0		0
0		0		0		0		0		0		0		0		0		0		0		0		0		0		0		0		0		0		0		0		0		0		0		0		0
0		0		0		0		0		0		0		0		0		0		0		0		0		0		0		0		0		0		0		0		0		0		0		0		0
0		0		0		0		0		0		0		0		0		0		0		0		0		0		0		0		0		0		0		0		0		0		0		0		0
0		0		0		0		0		0		0		0		0		0		0		0		0		0		0		0		0		0		0		0		0		0		0		0		0
0		0		0		0		0		0		0		0		0		0		0		0		0		0		0		0		0		0		0		0		0		0		0		0		0
0		0		0		0		0		0		0		0		0		0		0		0		0		0		0		0		0		0		0		0		0		0		0		0		0
0		0		0		0		0		0		0		0		0		0		0		0		0		0		0		0		0		0		0		0		0		0		0		0		0
0		0		0		0		0		0		0		0		0		0		0		0		0		0		0		0		0		0		0		0		0		0		0		0		0
0		0		0		0		0		0		0		0		0		0		0		0		0		0		0		0		0		0		0		0		0		0		0		0		0
0		0		0		0		0		0		0		0		0		0		0		0		0		0		0		0		0		0		0		0		0		0		0		0		0
__FICalcNewValue		__FICalcNewValue		__FICalcNewValue		__FICalcNewValue		__FICalcNewValue		__FICalcNewValue		__FICalcNewValue		__FICalcNewValue		__FICalcNewValue		__FICalcNewValue		__FICalcNewValue		__FICalcNewValue		__FICalcNewValue		__FICalcNewValue		__FICalcNewValue		__FICalcNewValue		__FICalcNewValue		__FICalcNewValue		__FICalcNewValue		__FICalcNewValue		__FICalcNewValue		__FICalcNewValue		__FICalcNewValue		__FICalcNewValue		__FICalcNewValue
1		1		1		1		1		1		1		1		1		1		1		1		1		1		1		1		1		1		1		1		1		1		1		1		1
__FIWhereXYValue		__FIWhereXYValue		__FIWhereXYValue		__FIWhereXYValue		__FIWhereXYValue		__FIWhereXYValue		__FIWhereXYValue		__FIWhereXYValue		__FIWhereXYValue		__FIWhereXYValue		__FIWhereXYValue		__FIWhereXYValue		__FIWhereXYValue		__FIWhereXYValue		__FIWhereXYValue		__FIWhereXYValue		__FIWhereXYValue		__FIWhereXYValue		__FIWhereXYValue		__FIWhereXYValue		__FIWhereXYValue		__FIWhereXYValue		__FIWhereXYValue		__FIWhereXYValue		__FIWhereXYValue
0		0		0		0		0		0		0		0		0		0		0		0		0		0		0		0		0		0		0		0		0		0		0		0		0
__FIPermitExtrapolation		__FIPermitExtrapolation		__FIPermitExtrapolation		__FIPermitExtrapolation		__FIPermitExtrapolation		__FIPermitExtrapolation		__FIPermitExtrapolation		__FIPermitExtrapolation		__FIPermitExtrapolation		__FIPermitExtrapolation		__FIPermitExtrapolation		__FIPermitExtrapolation		__FIPermitExtrapolation		__FIPermitExtrapolation		__FIPermitExtrapolation		__FIPermitExtrapolation		__FIPermitExtrapolation		__FIPermitExtrapolation		__FIPermitExtrapolation		__FIPermitExtrapolation		__FIPermitExtrapolation		__FIPermitExtrapolation		__FIPermitExtrapolation		__FIPermitExtrapolation		__FIPermitExtrapolation
0		0		0		0		0		0		0		0		0		0		0		0		0		0		0		0		0		0		0		0		0		0		0		0		0
__FIDetectSuspectData		__FIDetectSuspectData		__FIDetectSuspectData		__FIDetectSuspectData		__FIDetectSuspectData		__FIDetectSuspectData		__FIDetectSuspectData		__FIDetectSuspectData		__FIDetectSuspectData		__FIDetectSuspectData		__FIDetectSuspectData		__FIDetectSuspectData		__FIDetectSuspectData		__FIDetectSuspectData		__FIDetectSuspectData		__FIDetectSuspectData		__FIDetectSuspectData		__FIDetectSuspectData		__FIDetectSuspectData		__FIDetectSuspectData		__FIDetectSuspectData		__FIDetectSuspectData		__FIDetectSuspectData		__FIDetectSuspectData		__FIDetectSuspectData
0		0		0		0		0		0		0		0		0		0		0		0		0		0		0		0		0		0		0		0		0		0		0		0		0
__FIPreFit		__FIPreFit		__FIPreFit		__FIPreFit		__FIPreFit		__FIPreFit		__FIPreFit		__FIPreFit		__FIPreFit		__FIPreFit		__FIPreFit		__FIPreFit		__FIPreFit		__FIPreFit		__FIPreFit		__FIPreFit		__FIPreFit		__FIPreFit		__FIPreFit		__FIPreFit		__FIPreFit		__FIPreFit		__FIPreFit		__FIPreFit		__FIPreFit
-1		-1		-1		-1		-1		-1		-1		-1		-1		-1		-1		-1		-1		-1		-1		-1		-1		-1		-1		-1		-1		-1		-1		-1		-1
__FIParamValueOrig		__FIParamValueOrig		__FIParamValueOrig		__FIParamValueOrig		__FIParamValueOrig		__FIParamValueOrig		__FIParamValueOrig		__FIParamValueOrig		__FIParamValueOrig		__FIParamValueOrig		__FIParamValueOrig		__FIParamValueOrig		__FIParamValueOrig		__FIParamValueOrig		__FIParamValueOrig		__FIParamValueOrig		__FIParamValueOrig		__FIParamValueOrig		__FIParamValueOrig		__FIParamValueOrig		__FIParamValueOrig		__FIParamValueOrig		__FIParamValueOrig		__FIParamValueOrig		__FIParamValueOrig
0		0		0		0		0		0		0		0		0		0		0		0		0		0		0		0		0		0		0		0		0		0		0		0		0
100		100		100		100		100		100		100		100		100		100		100		100		100		100		100		100		100		100		100		100		100		100		100		100		100
0		0		0		0		0		0		0		0		0		0		0		0		0		0		0		0		0		0		0		0		0		0		0		0		0
0		0		0		0		0		0		0		0		0		0		0		0		0		0		0		0		0		0		0		0		0		0		0		0		0
__FIParamLocked		__FIParamLocked		__FIParamLocked		__FIParamLocked		__FIParamLocked		__FIParamLocked		__FIParamLocked		__FIParamLocked		__FIParamLocked		__FIParamLocked		__FIParamLocked		__FIParamLocked		__FIParamLocked		__FIParamLocked		__FIParamLocked		__FIParamLocked		__FIParamLocked		__FIParamLocked		__FIParamLocked		__FIParamLocked		__FIParamLocked		__FIParamLocked		__FIParamLocked		__FIParamLocked		__FIParamLocked
0		0		0		0		0		0		0		0		0		0		0		0		0		0		0		0		0		0		0		0		0		0		0		0		0
0		0		0		0		0		0		0		0		0		0		0		0		0		0		0		0		0		0		0		0		0		0		0		0		0
0		0		0		0		0		0		0		0		0		0		0		0		0		0		0		0		0		0		0		0		0		0		0		0		0
0		0		0		0		0		0		0		0		0		0		0		0		0		0		0		0		0		0		0		0		0		0		0		0		0
__FIParamValueFitted		__FIParamValueFitted		__FIParamValueFitted		__FIParamValueFitted		__FIParamValueFitted		__FIParamValueFitted		__FIParamValueFitted		__FIParamValueFitted		__FIParamValueFitted		__FIParamValueFitted		__FIParamValueFitted		__FIParamValueFitted		__FIParamValueFitted		__FIParamValueFitted		__FIParamValueFitted		__FIParamValueFitted		__FIParamValueFitted		__FIParamValueFitted		__FIParamValueFitted		__FIParamValueFitted		__FIParamValueFitted		__FIParamValueFitted		__FIParamValueFitted		__FIParamValueFitted		__FIParamValueFitted
168.056		1584.71		737.364		474.74		9042.47		205.433		66.4282		75.9325		60.9586		66.7101		-1871.51		-29977.7		88.31		191.471		68.5558		167.924		1980.98		73.5481		232.65		125.19		81.57		65.57		92.3115		226.549		21981.5
183.151		2012.82		1379.79		536.225		9818.06		252.83		78.5249		82.484		645.798		70.3632		191.453		283.985		96.7375		236.688		72.61		213.261		2413.65		190.873		273.002		141.37		91.651		73.4717		910.051		282.67		23299.3
25.637		-3249.18		29854.2		-42410		4014.98		8777.07		22576.3		124.778		2.0923e+09		211.93		107516		9.50533e+07		303.225		9438.7		-63551.8		6069.59		-1994.33		2.04171e+08		-48112.6		-17456.6		-5988.1		-45551.9		1.69023e+08		9739.58		-1315.03
29.6377		1		50.7893		1		15.3308		-15.2209		-1.38658		-9.12567		-0.307503		88.2919		2.66169		0.731991		-23.9591		12.8185		-1		-0.639891		1		-0.263122		1		1		1		1		-0.406192		-15.014		1
__FIParamStdErr		__FIParamStdErr		__FIParamStdErr		__FIParamStdErr		__FIParamStdErr		__FIParamStdErr		__FIParamStdErr		__FIParamStdErr		__FIParamStdErr		__FIParamStdErr		__FIParamStdErr		__FIParamStdErr		__FIParamStdErr		__FIParamStdErr		__FIParamStdErr		__FIParamStdErr		__FIParamStdErr		__FIParamStdErr		__FIParamStdErr		__FIParamStdErr		__FIParamStdErr		__FIParamStdErr		__FIParamStdErr		__FIParamStdErr		__FIParamStdErr
0		0		0		0		0		0		0		0		0		0		0		0		0		0		0		0		0		0		0		0		0		0		0		0		0
0		0		0		0		0		0		0		0		0		0		0		0		0		0		0		0		0		0		4.49423e+307		4.49423e+307		4.49423e+307		4.49423e+307		0		0		0
0		0		0		0		0		0		0		0		0		0		0		0		0		0		0		0		0		0		0		0		0		0		0		0		0
0		0		0		0		0		0		0		0		0		0		0		0		0		0		0		0		0		0		0		0		0		0		0		0		0
__FIParamConfInt95		__FIParamConfInt95		__FIParamConfInt95		__FIParamConfInt95		__FIParamConfInt95		__FIParamConfInt95		__FIParamConfInt95		__FIParamConfInt95		__FIParamConfInt95		__FIParamConfInt95		__FIParamConfInt95		__FIParamConfInt95		__FIParamConfInt95		__FIParamConfInt95		__FIParamConfInt95		__FIParamConfInt95		__FIParamConfInt95		__FIParamConfInt95		__FIParamConfInt95		__FIParamConfInt95		__FIParamConfInt95		__FIParamConfInt95		__FIParamConfInt95		__FIParamConfInt95		__FIParamConfInt95
0		0		0		0		0		0		0		0		0		0		0		0		0		0		0		0		0		0		0		0		0		0		0		0		0
0		0		0		0		0		0		0		0		0		0		0		0		0		0		0		0		0		0		4.49423e+307		4.49423e+307		4.49423e+307		4.49423e+307		0		0		0
0		0		0		0		0		0		0		0		0		0		0		0		0		0		0		0		0		0		0		0		0		0		0		0		0
0		0		0		0		0		0		0		0		0		0		0		0		0		0		0		0		0		0		0		0		0		0		0		0		0
__FIReturnnInfoValue		__FIReturnnInfoValue		__FIReturnnInfoValue		__FIReturnnInfoValue		__FIReturnnInfoValue		__FIReturnnInfoValue		__FIReturnnInfoValue		__FIReturnnInfoValue		__FIReturnnInfoValue		__FIReturnnInfoValue		__FIReturnnInfoValue		__FIReturnnInfoValue		__FIReturnnInfoValue		__FIReturnnInfoValue		__FIReturnnInfoValue		__FIReturnnInfoValue		__FIReturnnInfoValue		__FIReturnnInfoValue		__FIReturnnInfoValue		__FIReturnnInfoValue		__FIReturnnInfoValue		__FIReturnnInfoValue		__FIReturnnInfoValue		__FIReturnnInfoValue		__FIReturnnInfoValue
564.867		0		86582.1		40544.5		745894		2505.13		37.3686		93.7395		0		66.3399		3104.44		4449.8		162.27		1873.37		0		1137.66		0		99.6267		21456.2		2916.82		1018.17		567.45		0		2226.47		0
44		0		11		78		33		15		10		42		0		49		24		186		22		26		0		18		0		47		119		55		84		42		0		19		0
1222435642		1222435642		1222435642		1222435641		1222435641		1222435640		1222435640		1222435640		1222435639		1222435639		1222435639		1222435638		1222435638		1222435637		1222435637		1222435636		1222435636		1222435635		1222435635		1222435635		1222435634		1222435633		1222435642		1222435642		1222435641
13		13		13		13		13		13		13		13		13		13		13		13		13		13		13		13		13		13		13		13		13		13		13		13		13
4		4		4		4		4		4		4		4		4		4		4		4		4		4		4		4		4		4		4		4		4		4		4		4		4
9		9		9		9		9		9		9		9		9		9		9		9		9		9		9		9		9		9		9		9		9		9		9		9		9
1.8366		0		1.72073		1.84865		1.73884		1.74277		1.7166		1.7493		0		3.48064		1.75913		1.64839		1.74506		1.73771		0		1.75164		0		1.78985		1.17744		1.48249		1.32063		1.33861		0		1.60912		0
0		0		0		0		0		0		0		0		0		0		0		0		0		0		0		0		0		0		-4.28093		0.393987		0.289986		-1.09587		0		0		0
0		0		0		0		0		0		0		0		0		0		0		0		0		0		0		0		0		0		-0.127405		0.131392		0.377804		-0.0422869		0		0		0
0		0		0		0		0		0		0		0		0		0		0		0		0		0		0		0		0		0		0.0162321		0.0172639		0.142736		0.00178818		0		0		0
0		0		0		0		0		0		0		0		0		0		0		0		0		0		0		0		0		0		9.19257e+06		3.66063e+06		2.5606e+06		2.43279e+06		0		0		0
0		0		0		0		0		0		0		0		0		0		0		0		0		0		0		0		0		0		81.766		201.478		235.687		272.76		0		0		0
1222435642		1222435642		1222435642		1222435641		1222435641		1222435640		1222435640		1222435640		1222435639		1222435639		1222435639		1222435638		1222435638		1222435637		1222435637		1222435636		1222435636		1222435635		1222435635		1222435635		1222435634		1222435633		1222435642		1222435642		1222435641
__FIFitCount		__FIFitCount		__FIFitCount		__FIFitCount		__FIFitCount		__FIFitCount		__FIFitCount		__FIFitCount		__FIFitCount		__FIFitCount		__FIFitCount		__FIFitCount		__FIFitCount		__FIFitCount		__FIFitCount		__FIFitCount		__FIFitCount		__FIFitCount		__FIFitCount		__FIFitCount		__FIFitCount		__FIFitCount		__FIFitCount		__FIFitCount		__FIFitCount
1		1		1		1		1		1		1		1		1		1		1		1		1		1		1		1		1		1		1		1		1		1		1		1		1
___FRImatinib 4 hour data!E2606	___GDImatinib 4 hour data!E2606	___FRImatinib 4 hour data!E2617	___GDImatinib 4 hour data!E2617	___FRImatinib 4 hour data!E2628	___GDImatinib 4 hour data!E2628	___FRImatinib 4 hour data!E2639	___GDImatinib 4 hour data!E2639	___FRImatinib 4 hour data!E2705	___GDImatinib 4 hour data!E2705	___FRImatinib 4 hour data!E2716	___GDImatinib 4 hour data!E2716	___FRImatinib 4 hour data!E2727	___GDImatinib 4 hour data!E2727	___FRImatinib 4 hour data!E2480	___GDImatinib 4 hour data!E2480	___FRImatinib 4 hour data!E2491	___GDImatinib 4 hour data!E2491	___FRImatinib 4 hour data!E2508	___GDImatinib 4 hour data!E2508	___FRImatinib 4 hour data!E2519	___GDImatinib 4 hour data!E2519	___FRImatinib 4 hour data!E2590	___GDImatinib 4 hour data!E2590	___FRImatinib 4 hour data!E2607	___GDImatinib 4 hour data!E2607	___FRImatinib 4 hour data!E2618	___GDImatinib 4 hour data!E2618	___FRImatinib 4 hour data!E2629	___GDImatinib 4 hour data!E2629	___FRImatinib 4 hour data!E2706	___GDImatinib 4 hour data!E2706	___FRImatinib 4 hour data!E2717	___GDImatinib 4 hour data!E2717	___FRImatinib 4 hour data!E2728	___GDImatinib 4 hour data!E2728	___FRImatinib 4 hour data!E2481	___GDImatinib 4 hour data!E2481	___FRImatinib 4 hour data!E2492	___GDImatinib 4 hour data!E2492	___FRImatinib 4 hour data!E2509	___GDImatinib 4 hour data!E2509	___FRImatinib 4 hour data!E2580	___GDImatinib 4 hour data!E2580	___FRImatinib 4 hour data!E2591	___GDImatinib 4 hour data!E2591	___FRImatinib 4 hour data!E2608	___GDImatinib 4 hour data!E2608	___FRImatinib 4 hour data!E2619	___GDImatinib 4 hour data!E2619
__FIFitSucessful	__FIReturnInfoCode	__FIFitSucessful	__FIReturnInfoCode	__FIFitSucessful	__FIReturnInfoCode	__FIFitSucessful	__FIReturnInfoCode	__FIFitSucessful	__FIReturnInfoCode	__FIFitSucessful	__FIReturnInfoCode	__FIFitSucessful	__FIReturnInfoCode	__FIFitSucessful	__FIReturnInfoCode	__FIFitSucessful	__FIReturnInfoCode	__FIFitSucessful	__FIReturnInfoCode	__FIFitSucessful	__FIReturnInfoCode	__FIFitSucessful	__FIReturnInfoCode	__FIFitSucessful	__FIReturnInfoCode	__FIFitSucessful	__FIReturnInfoCode	__FIFitSucessful	__FIReturnInfoCode	__FIFitSucessful	__FIReturnInfoCode	__FIFitSucessful	__FIReturnInfoCode	__FIFitSucessful	__FIReturnInfoCode	__FIFitSucessful	__FIReturnInfoCode	__FIFitSucessful	__FIReturnInfoCode	__FIFitSucessful	__FIReturnInfoCode	__FIFitSucessful	__FIReturnInfoCode	__FIFitSucessful	__FIReturnInfoCode	__FIFitSucessful	__FIReturnInfoCode	__FIFitSucessful	__FIReturnInfoCode
0	0	0	0	0	0	0	0	1	0	1	0	1	0	0	0	0	0	0	0	0	0	0	0	0	0	0	0	0	0	1	0	1	0	1	0	0	0	0	0	0	0	0	0	0	0	0	0	0	0
__FIResult	__FIGraphTitle	__FIResult	__FIGraphTitle	__FIResult	__FIGraphTitle	__FIResult	__FIGraphTitle	__FIResult	__FIGraphTitle	__FIResult	__FIGraphTitle	__FIResult	__FIGraphTitle	__FIResult	__FIGraphTitle	__FIResult	__FIGraphTitle	__FIResult	__FIGraphTitle	__FIResult	__FIGraphTitle	__FIResult	__FIGraphTitle	__FIResult	__FIGraphTitle	__FIResult	__FIGraphTitle	__FIResult	__FIGraphTitle	__FIResult	__FIGraphTitle	__FIResult	__FIGraphTitle	__FIResult	__FIGraphTitle	__FIResult	__FIGraphTitle	__FIResult	__FIGraphTitle	__FIResult	__FIGraphTitle	__FIResult	__FIGraphTitle	__FIResult	__FIGraphTitle	__FIResult	__FIGraphTitle	__FIResult	__FIGraphTitle
#NoFit!	____FI__NULLVALUE	#NoFit!	____FI__NULLVALUE	#NoFit!	____FI__NULLVALUE	#NoFit!	____FI__NULLVALUE	#Ok!	____FI__NULLVALUE	#Ok!	____FI__NULLVALUE	#Ok!	____FI__NULLVALUE	#NoFit!	____FI__NULLVALUE	#NoFit!	____FI__NULLVALUE	#NoFit!	____FI__NULLVALUE	#NoFit!	____FI__NULLVALUE	#NoFit!	____FI__NULLVALUE	#NoFit!	____FI__NULLVALUE	#NoFit!	____FI__NULLVALUE	#NoFit!	____FI__NULLVALUE	#Ok!	____FI__NULLVALUE	#Ok!	____FI__NULLVALUE	#Ok!	____FI__NULLVALUE	#NoFit!	____FI__NULLVALUE	#NoFit!	____FI__NULLVALUE	#NoFit!	____FI__NULLVALUE	#NoFit!	____FI__NULLVALUE	#NoFit!	____FI__NULLVALUE	#NoFit!	____FI__NULLVALUE	#NoFit!	____FI__NULLVALUE
__FINumDataPoints	__FIDataTitle	__FINumDataPoints	__FIDataTitle	__FINumDataPoints	__FIDataTitle	__FINumDataPoints	__FIDataTitle	__FINumDataPoints	__FIDataTitle	__FINumDataPoints	__FIDataTitle	__FINumDataPoints	__FIDataTitle	__FINumDataPoints	__FIDataTitle	__FINumDataPoints	__FIDataTitle	__FINumDataPoints	__FIDataTitle	__FINumDataPoints	__FIDataTitle	__FINumDataPoints	__FIDataTitle	__FINumDataPoints	__FIDataTitle	__FINumDataPoints	__FIDataTitle	__FINumDataPoints	__FIDataTitle	__FINumDataPoints	__FIDataTitle	__FINumDataPoints	__FIDataTitle	__FINumDataPoints	__FIDataTitle	__FINumDataPoints	__FIDataTitle	__FINumDataPoints	__FIDataTitle	__FINumDataPoints	__FIDataTitle	__FINumDataPoints	__FIDataTitle	__FINumDataPoints	__FIDataTitle	__FINumDataPoints	__FIDataTitle	__FINumDataPoints	__FIDataTitle
13	____FI__NULLVALUE	13	____FI__NULLVALUE	13	____FI__NULLVALUE	13	____FI__NULLVALUE	13	____FI__NULLVALUE	13	____FI__NULLVALUE	13	____FI__NULLVALUE	13	____FI__NULLVALUE	13	____FI__NULLVALUE	13	____FI__NULLVALUE	13	____FI__NULLVALUE	13	____FI__NULLVALUE	13	____FI__NULLVALUE	13	____FI__NULLVALUE	13	____FI__NULLVALUE	13	____FI__NULLVALUE	13	____FI__NULLVALUE	13	____FI__NULLVALUE	13	____FI__NULLVALUE	13	____FI__NULLVALUE	13	____FI__NULLVALUE	13	____FI__NULLVALUE	13	____FI__NULLVALUE	13	____FI__NULLVALUE	13	____FI__NULLVALUE
__FIModelNumber	__FILabelX	__FIModelNumber	__FILabelX	__FIModelNumber	__FILabelX	__FIModelNumber	__FILabelX	__FIModelNumber	__FILabelX	__FIModelNumber	__FILabelX	__FIModelNumber	__FILabelX	__FIModelNumber	__FILabelX	__FIModelNumber	__FILabelX	__FIModelNumber	__FILabelX	__FIModelNumber	__FILabelX	__FIModelNumber	__FILabelX	__FIModelNumber	__FILabelX	__FIModelNumber	__FILabelX	__FIModelNumber	__FILabelX	__FIModelNumber	__FILabelX	__FIModelNumber	__FILabelX	__FIModelNumber	__FILabelX	__FIModelNumber	__FILabelX	__FIModelNumber	__FILabelX	__FIModelNumber	__FILabelX	__FIModelNumber	__FILabelX	__FIModelNumber	__FILabelX	__FIModelNumber	__FILabelX	__FIModelNumber	__FILabelX
201	____FI__NULLVALUE	201	____FI__NULLVALUE	201	____FI__NULLVALUE	201	____FI__NULLVALUE	201	____FI__NULLVALUE	201	____FI__NULLVALUE	201	____FI__NULLVALUE	201	____FI__NULLVALUE	201	____FI__NULLVALUE	201	____FI__NULLVALUE	201	____FI__NULLVALUE	201	____FI__NULLVALUE	201	____FI__NULLVALUE	201	____FI__NULLVALUE	201	____FI__NULLVALUE	201	____FI__NULLVALUE	201	____FI__NULLVALUE	201	____FI__NULLVALUE	201	____FI__NULLVALUE	201	____FI__NULLVALUE	201	____FI__NULLVALUE	201	____FI__NULLVALUE	201	____FI__NULLVALUE	201	____FI__NULLVALUE	201	____FI__NULLVALUE
__FIKnownX	__FILabelY	__FIKnownX	__FILabelY	__FIKnownX	__FILabelY	__FIKnownX	__FILabelY	__FIKnownX	__FILabelY	__FIKnownX	__FILabelY	__FIKnownX	__FILabelY	__FIKnownX	__FILabelY	__FIKnownX	__FILabelY	__FIKnownX	__FILabelY	__FIKnownX	__FILabelY	__FIKnownX	__FILabelY	__FIKnownX	__FILabelY	__FIKnownX	__FILabelY	__FIKnownX	__FILabelY	__FIKnownX	__FILabelY	__FIKnownX	__FILabelY	__FIKnownX	__FILabelY	__FIKnownX	__FILabelY	__FIKnownX	__FILabelY	__FIKnownX	__FILabelY	__FIKnownX	__FILabelY	__FIKnownX	__FILabelY	__FIKnownX	__FILabelY	__FIKnownX	__FILabelY
0	____FI__NULLVALUE	0	____FI__NULLVALUE	0	____FI__NULLVALUE	0	____FI__NULLVALUE	0	____FI__NULLVALUE	0	____FI__NULLVALUE	0	____FI__NULLVALUE	0	____FI__NULLVALUE	0	____FI__NULLVALUE	0	____FI__NULLVALUE	0	____FI__NULLVALUE	0	____FI__NULLVALUE	0	____FI__NULLVALUE	0	____FI__NULLVALUE	0	____FI__NULLVALUE	0	____FI__NULLVALUE	0	____FI__NULLVALUE	0	____FI__NULLVALUE	0	____FI__NULLVALUE	0	____FI__NULLVALUE	0	____FI__NULLVALUE	0	____FI__NULLVALUE	0	____FI__NULLVALUE	0	____FI__NULLVALUE	0	____FI__NULLVALUE
0.17	__FIKnownXRange	0.17	__FIKnownXRange	0.17	__FIKnownXRange	0.17	__FIKnownXRange	0.17	__FIKnownXRange	0.17	__FIKnownXRange	0.17	__FIKnownXRange	0.17	__FIKnownXRange	0.17	__FIKnownXRange	0.17	__FIKnownXRange	0.17	__FIKnownXRange	0.17	__FIKnownXRange	0.17	__FIKnownXRange	0.17	__FIKnownXRange	0.17	__FIKnownXRange	0.17	__FIKnownXRange	0.17	__FIKnownXRange	0.17	__FIKnownXRange	0.17	__FIKnownXRange	0.17	__FIKnownXRange	0.17	__FIKnownXRange	0.17	__FIKnownXRange	0.17	__FIKnownXRange	0.17	__FIKnownXRange	0.17	__FIKnownXRange
0.5	Imatinib 4 hour data	0.5	Imatinib 4 hour data	0.5	Imatinib 4 hour data	0.5	Imatinib 4 hour data	0.5	Imatinib 4 hour data	0.5	Imatinib 4 hour data	0.5	Imatinib 4 hour data	0.5	Imatinib 4 hour data	0.5	Imatinib 4 hour data	0.5	Imatinib 4 hour data	0.5	Imatinib 4 hour data	0.5	Imatinib 4 hour data	0.5	Imatinib 4 hour data	0.5	Imatinib 4 hour data	0.5	Imatinib 4 hour data	0.5	Imatinib 4 hour data	0.5	Imatinib 4 hour data	0.5	Imatinib 4 hour data	0.5	Imatinib 4 hour data	0.5	Imatinib 4 hour data	0.5	Imatinib 4 hour data	0.5	Imatinib 4 hour data	0.5	Imatinib 4 hour data	0.5	Imatinib 4 hour data	0.5	Imatinib 4 hour data
1.5	1	1.5	1	1.5	1	1.5	1	1.5	1	1.5	1	1.5	1	1.5	1	1.5	1	1.5	1	1.5	1	1.5	1	1.5	1	1.5	1	1.5	1	1.5	1	1.5	1	1.5	1	1.5	1	1.5	1	1.5	1	1.5	1	1.5	1	1.5	1	1.5	1
4.5	1	4.5	1	4.5	1	4.5	1	4.5	1	4.5	1	4.5	1	4.5	1	4.5	1	4.5	1	4.5	1	4.5	1	4.5	1	4.5	1	4.5	1	4.5	1	4.5	1	4.5	1	4.5	1	4.5	1	4.5	1	4.5	1	4.5	1	4.5	1	4.5	1
13.7	9	13.7	9	13.7	9	13.7	9	13.7	9	13.7	9	13.7	9	13.7	9	13.7	9	13.7	9	13.7	9	13.7	9	13.7	9	13.7	9	13.7	9	13.7	9	13.7	9	13.7	9	13.7	9	13.7	9	13.7	9	13.7	9	13.7	9	13.7	9	13.7	9
41.2	21	41.2	21	41.2	21	41.2	21	41.2	21	41.2	21	41.2	21	41.2	21	41.2	21	41.2	21	41.2	21	41.2	21	41.2	21	41.2	21	41.2	21	41.2	21	41.2	21	41.2	21	41.2	21	41.2	21	41.2	21	41.2	21	41.2	21	41.2	21	41.2	21
123.5	1	123.5	1	123.5	1	123.5	1	123.5	1	123.5	1	123.5	1	123.5	1	123.5	1	123.5	1	123.5	1	123.5	1	123.5	1	123.5	1	123.5	1	123.5	1	123.5	1	123.5	1	123.5	1	123.5	1	123.5	1	123.5	1	123.5	1	123.5	1	123.5	1
370.4	__FIKnownYRange	370.4	__FIKnownYRange	370.4	__FIKnownYRange	370.4	__FIKnownYRange	370.4	__FIKnownYRange	370.4	__FIKnownYRange	370.4	__FIKnownYRange	370.4	__FIKnownYRange	370.4	__FIKnownYRange	370.4	__FIKnownYRange	370.4	__FIKnownYRange	370.4	__FIKnownYRange	370.4	__FIKnownYRange	370.4	__FIKnownYRange	370.4	__FIKnownYRange	370.4	__FIKnownYRange	370.4	__FIKnownYRange	370.4	__FIKnownYRange	370.4	__FIKnownYRange	370.4	__FIKnownYRange	370.4	__FIKnownYRange	370.4	__FIKnownYRange	370.4	__FIKnownYRange	370.4	__FIKnownYRange	370.4	__FIKnownYRange
1111	Imatinib 4 hour data	1111	Imatinib 4 hour data	1111	Imatinib 4 hour data	1111	Imatinib 4 hour data	1111	Imatinib 4 hour data	1111	Imatinib 4 hour data	1111	Imatinib 4 hour data	1111	Imatinib 4 hour data	1111	Imatinib 4 hour data	1111	Imatinib 4 hour data	1111	Imatinib 4 hour data	1111	Imatinib 4 hour data	1111	Imatinib 4 hour data	1111	Imatinib 4 hour data	1111	Imatinib 4 hour data	1111	Imatinib 4 hour data	1111	Imatinib 4 hour data	1111	Imatinib 4 hour data	1111	Imatinib 4 hour data	1111	Imatinib 4 hour data	1111	Imatinib 4 hour data	1111	Imatinib 4 hour data	1111	Imatinib 4 hour data	1111	Imatinib 4 hour data	1111	Imatinib 4 hour data
3333	2605	3333	2616	3333	2627	3333	2638	3333	2704	3333	2715	3333	2726	3333	2479	3333	2490	3333	2507	3333	2518	3333	2589	3333	2606	3333	2617	3333	2628	3333	2705	3333	2716	3333	2727	3333	2480	3333	2491	3333	2508	3333	2579	3333	2590	3333	2607	3333	2618
10000	2605	10000	2616	10000	2627	10000	2638	10000	2704	10000	2715	10000	2726	10000	2479	10000	2490	10000	2507	10000	2518	10000	2589	10000	2606	10000	2617	10000	2628	10000	2705	10000	2716	10000	2727	10000	2480	10000	2491	10000	2508	10000	2579	10000	2590	10000	2607	10000	2618
30000	9	30000	9	30000	9	30000	9	30000	9	30000	9	30000	9	30000	9	30000	9	30000	9	30000	9	30000	9	30000	9	30000	9	30000	9	30000	9	30000	9	30000	9	30000	9	30000	9	30000	9	30000	9	30000	9	30000	9	30000	9
__FIKnownY	21	__FIKnownY	21	__FIKnownY	21	__FIKnownY	21	__FIKnownY	21	__FIKnownY	21	__FIKnownY	21	__FIKnownY	21	__FIKnownY	21	__FIKnownY	21	__FIKnownY	21	__FIKnownY	21	__FIKnownY	21	__FIKnownY	21	__FIKnownY	21	__FIKnownY	21	__FIKnownY	21	__FIKnownY	21	__FIKnownY	21	__FIKnownY	21	__FIKnownY	21	__FIKnownY	21	__FIKnownY	21	__FIKnownY	21	__FIKnownY	21
2167.44	1	642.9	1	72.68	1	616.99	1	78.3	1	75.82	1	64.47	1	2074.51	1	82.37	1	648.47	1	161.21	1	2507.83	1	99.93	1	86.49	1	7422.95	1	73.3	1	68.97	1	70.7	1	275.28	1	1924.29	1	3881.03	1	1002.31	1	570.91	1	88.64	1	109.19	1
2202.61	__FIError	643.59	__FIError	71.36	__FIError	558.73	__FIError	89.08	__FIError	69.26	__FIError	78.79	__FIError	2273.97	__FIError	84.16	__FIError	694.1	__FIError	165.88	__FIError	2483.23	__FIError	91.39	__FIError	89.08	__FIError	7522.52	__FIError	75.01	__FIError	65.8	__FIError	78.36	__FIError	317.81	__FIError	2010.03	__FIError	3853.62	__FIError	1024.71	__FIError	569.68	__FIError	97.21	__FIError	113.93	__FIError
2118.75	0	632.1	0	72.15	0	505.65	0	69.17	0	76.9	0	66.95	0	2382.07	0	93.9	0	696.03	0	179.64	0	2398.64	0	96.74	0	93.83	0	7606.41	0	68.97	0	67.74	0	67.79	0	230.24	0	2038.09	0	4048.02	0	1089.92	0	516.28	0	88.77	0	131.23	0
2236.46	0	626.43	0	79.78	0	645.38	0	94.16	0	78.3	0	58.61	0	2315.33	0	92.54	0	624.26	0	144.41	0	2438.87	0	89.7	0	85.04	0	6855.28	0	93.44	0	64.89	0	63.29	0	262.83	0	2145.35	0	3858.97	0	1009.9	0	594.28	0	89.64	0	122.19	0
2143.87	0	653.93	0	75.37	0	593.87	0	76.16	0	71.7	0	64.09	0	2123.16	0	83.75	0	681.7	0	148.47	0	2417	0	116.65	0	87.85	0	7439.55	0	78.9	0	68.07	0	71.7	0	257.25	0	1771.8	0	3813.76	0	991.18	0	524.57	0	92.86	0	115.92	0
2092.48	0	635.61	0	68.78	0	600.91	0	77.82	0	85.63	0	63.56	0	2316.93	0	73.47	0	728.61	0	161.12	0	2355.8	0	103.11	0	88.89	0	7470.56	0	72.15	0	75.11	0	67.51	0	257.25	0	2014.21	0	3829.66	0	1034.7	0	595.52	0	83.92	0	109.29	0
2280.29	0	676.99	0	71.06	0	607.61	0	83	0	71.46	0	62.86	0	2204.14	0	83.29	0	714.11	0	165.08	0	2462.66	0	96.4	0	87.85	0	7377.93	0	74.08	0	68.5	0	73.62	0	256.89	0	1829.2	0	3989.52	0	1010.6	0	574.04	0	83.69	0	111.82	0
2036.67	0	563	0	76	0	553.72	0	70.38	0	71.8	0	71.85	0	2323.36	0	79.01	0	622.53	0	173.53	0	2216.4	0	92.48	0	100.36	0	7403.54	0	70.38	0	61.1	0	70.52	0	284.84	0	1779.18	0	3776.93	0	944.89	0	553.72	0	84.62	0	126.94	0
2151.31	0	569.28	0	79.23	0	515.2	0	76.48	0	72.35	0	59.22	0	1940.21	0	74.85	0	618.66	0	126.68	0	2502.23	0	104.33	0	92.22	0	7638.11	0	81.35	0	64.71	0	65.89	0	274.18	0	1889.78	0	3858.97	0	1031.12	0	519.15	0	93.7	0	101.13	0
2121.69	0	593.46	0	63.08	0	582.05	0	77.65	0	75.17	0	66.26	0	2172.29	0	77.12	0	640.48	0	171.14	0	2346.02	0	102.11	0	96.8	0	6690.97	0	69.5	0	68.69	0	64.4	0	297.55	0	1748.62	0	3560.84	0	982.29	0	520.59	0	105.57	0	107.93	0
2035.26	0	586.51	0	70.33	0	468.86	0	75.69	0	69.55	0	63.08	0	2115.82	0	100.29	0	641.36	0	160.9	0	2382.07	0	102.61	0	92.22	0	6926.93	0	69.26	0	62.03	0	70.86	0	243.03	0	1774.26	0	4087.49	0	1038.29	0	467.56	0	99.32	0	99.59	0
2204.14	0	636.05	0	72.4	0	539.69	0	75.95	0	68.45	0	65.03	0	1959.13	0	108.91	0	586.91	0	169.84	0	2187.4	0	99.59	0	92.16	0	7106.88	0	71.26	0	67.65	0	68.5	0	304.44	0	1787.84	0	3361.76	0	915.24	0	561.83	0	91.71	0	104.04	0
1847.04	0	500.42	0	90.95	0	378.72	0	73.31	0	69.99	0	59.59	0	1785.36	0	92.41	0	598.83	0	102.11	0	2163.27	0	128.27	0	96.8	0	6936.54	0	66.95	0	65.03	0	68.83	0	359.79	0	1786.6	0	3521.56	0	904.51	0	393.17	0	108.38	0	98.36	0
__FIWeight	0	__FIWeight	0	__FIWeight	0	__FIWeight	0	__FIWeight	0	__FIWeight	0	__FIWeight	0	__FIWeight	0	__FIWeight	0	__FIWeight	0	__FIWeight	0	__FIWeight	0	__FIWeight	0	__FIWeight	0	__FIWeight	0	__FIWeight	0	__FIWeight	0	__FIWeight	0	__FIWeight	0	__FIWeight	0	__FIWeight	0	__FIWeight	0	__FIWeight	0	__FIWeight	0	__FIWeight	0
1	0	1	0	1	0	1	0	1	0	1	0	1	0	1	0	1	0	1	0	1	0	1	0	1	0	1	0	1	0	1	0	1	0	1	0	1	0	1	0	1	0	1	0	1	0	1	0	1	0
1	__FIParamReturnCell	1	__FIParamReturnCell	1	__FIParamReturnCell	1	__FIParamReturnCell	1	__FIParamReturnCell	1	__FIParamReturnCell	1	__FIParamReturnCell	1	__FIParamReturnCell	1	__FIParamReturnCell	1	__FIParamReturnCell	1	__FIParamReturnCell	1	__FIParamReturnCell	1	__FIParamReturnCell	1	__FIParamReturnCell	1	__FIParamReturnCell	1	__FIParamReturnCell	1	__FIParamReturnCell	1	__FIParamReturnCell	1	__FIParamReturnCell	1	__FIParamReturnCell	1	__FIParamReturnCell	1	__FIParamReturnCell	1	__FIParamReturnCell	1	__FIParamReturnCell	1	__FIParamReturnCell
1	____FI__NULLVALUE	1	____FI__NULLVALUE	1	____FI__NULLVALUE	1	____FI__NULLVALUE	1	____FI__NULLVALUE	1	____FI__NULLVALUE	1	____FI__NULLVALUE	1	____FI__NULLVALUE	1	____FI__NULLVALUE	1	____FI__NULLVALUE	1	____FI__NULLVALUE	1	____FI__NULLVALUE	1	____FI__NULLVALUE	1	____FI__NULLVALUE	1	____FI__NULLVALUE	1	____FI__NULLVALUE	1	____FI__NULLVALUE	1	____FI__NULLVALUE	1	____FI__NULLVALUE	1	____FI__NULLVALUE	1	____FI__NULLVALUE	1	____FI__NULLVALUE	1	____FI__NULLVALUE	1	____FI__NULLVALUE	1	____FI__NULLVALUE
1	____FI__NULLVALUE	1	____FI__NULLVALUE	1	____FI__NULLVALUE	1	____FI__NULLVALUE	1	____FI__NULLVALUE	1	____FI__NULLVALUE	1	____FI__NULLVALUE	1	____FI__NULLVALUE	1	____FI__NULLVALUE	1	____FI__NULLVALUE	1	____FI__NULLVALUE	1	____FI__NULLVALUE	1	____FI__NULLVALUE	1	____FI__NULLVALUE	1	____FI__NULLVALUE	1	____FI__NULLVALUE	1	____FI__NULLVALUE	1	____FI__NULLVALUE	1	____FI__NULLVALUE	1	____FI__NULLVALUE	1	____FI__NULLVALUE	1	____FI__NULLVALUE	1	____FI__NULLVALUE	1	____FI__NULLVALUE	1	____FI__NULLVALUE
1	____FI__NULLVALUE	1	____FI__NULLVALUE	1	____FI__NULLVALUE	1	____FI__NULLVALUE	1	____FI__NULLVALUE	1	____FI__NULLVALUE	1	____FI__NULLVALUE	1	____FI__NULLVALUE	1	____FI__NULLVALUE	1	____FI__NULLVALUE	1	____FI__NULLVALUE	1	____FI__NULLVALUE	1	____FI__NULLVALUE	1	____FI__NULLVALUE	1	____FI__NULLVALUE	1	____FI__NULLVALUE	1	____FI__NULLVALUE	1	____FI__NULLVALUE	1	____FI__NULLVALUE	1	____FI__NULLVALUE	1	____FI__NULLVALUE	1	____FI__NULLVALUE	1	____FI__NULLVALUE	1	____FI__NULLVALUE	1	____FI__NULLVALUE
1	____FI__NULLVALUE	1	____FI__NULLVALUE	1	____FI__NULLVALUE	1	____FI__NULLVALUE	1	____FI__NULLVALUE	1	____FI__NULLVALUE	1	____FI__NULLVALUE	1	____FI__NULLVALUE	1	____FI__NULLVALUE	1	____FI__NULLVALUE	1	____FI__NULLVALUE	1	____FI__NULLVALUE	1	____FI__NULLVALUE	1	____FI__NULLVALUE	1	____FI__NULLVALUE	1	____FI__NULLVALUE	1	____FI__NULLVALUE	1	____FI__NULLVALUE	1	____FI__NULLVALUE	1	____FI__NULLVALUE	1	____FI__NULLVALUE	1	____FI__NULLVALUE	1	____FI__NULLVALUE	1	____FI__NULLVALUE	1	____FI__NULLVALUE
1		1		1		1		1		1		1		1		1		1		1		1		1		1		1		1		1		1		1		1		1		1		1		1		1
1		1		1		1		1		1		1		1		1		1		1		1		1		1		1		1		1		1		1		1		1		1		1		1		1
1		1		1		1		1		1		1		1		1		1		1		1		1		1		1		1		1		1		1		1		1		1		1		1		1
1		1		1		1		1		1		1		1		1		1		1		1		1		1		1		1		1		1		1		1		1		1		1		1		1
1		1		1		1		1		1		1		1		1		1		1		1		1		1		1		1		1		1		1		1		1		1		1		1		1
1		1		1		1		1		1		1		1		1		1		1		1		1		1		1		1		1		1		1		1		1		1		1		1		1
1		1		1		1		1		1		1		1		1		1		1		1		1		1		1		1		1		1		1		1		1		1		1		1		1
__FIPointExcluded		__FIPointExcluded		__FIPointExcluded		__FIPointExcluded		__FIPointExcluded		__FIPointExcluded		__FIPointExcluded		__FIPointExcluded		__FIPointExcluded		__FIPointExcluded		__FIPointExcluded		__FIPointExcluded		__FIPointExcluded		__FIPointExcluded		__FIPointExcluded		__FIPointExcluded		__FIPointExcluded		__FIPointExcluded		__FIPointExcluded		__FIPointExcluded		__FIPointExcluded		__FIPointExcluded		__FIPointExcluded		__FIPointExcluded		__FIPointExcluded
0		0		0		0		0		0		0		0		0		0		0		0		0		0		0		0		0		0		0		0		0		0		0		0		0
0		0		0		0		0		0		0		0		0		0		0		0		0		0		0		0		0		0		0		0		0		0		0		0		0
0		0		0		0		0		0		0		0		0		0		0		0		0		0		0		0		0		0		0		0		0		0		0		0		0
0		0		0		0		0		0		0		0		0		0		0		0		0		0		0		0		0		0		0		0		0		0		0		0		0
0		0		0		0		0		0		0		0		0		0		0		0		0		0		0		0		0		0		0		0		0		0		0		0		0
0		0		0		0		0		0		0		0		0		0		0		0		0		0		0		0		0		0		0		0		0		0		0		0		0
0		0		0		0		0		0		0		0		0		0		0		0		0		0		0		0		0		0		0		0		0		0		0		0		0
0		0		0		0		0		0		0		0		0		0		0		0		0		0		0		0		0		0		0		0		0		0		0		0		0
0		0		0		0		0		0		0		0		0		0		0		0		0		0		0		0		0		0		0		0		0		0		0		0		0
0		0		0		0		0		0		0		0		0		0		0		0		0		0		0		0		0		0		0		0		0		0		0		0		0
0		0		0		0		0		0		0		0		0		0		0		0		0		0		0		0		0		0		0		0		0		0		0		0		0
0		0		0		0		0		0		0		0		0		0		0		0		0		0		0		0		0		0		0		0		0		0		0		0		0
0		0		0		0		0		0		0		0		0		0		0		0		0		0		0		0		0		0		0		0		0		0		0		0		0
__FICalcNewValue		__FICalcNewValue		__FICalcNewValue		__FICalcNewValue		__FICalcNewValue		__FICalcNewValue		__FICalcNewValue		__FICalcNewValue		__FICalcNewValue		__FICalcNewValue		__FICalcNewValue		__FICalcNewValue		__FICalcNewValue		__FICalcNewValue		__FICalcNewValue		__FICalcNewValue		__FICalcNewValue		__FICalcNewValue		__FICalcNewValue		__FICalcNewValue		__FICalcNewValue		__FICalcNewValue		__FICalcNewValue		__FICalcNewValue		__FICalcNewValue
1		1		1		1		1		1		1		1		1		1		1		1		1		1		1		1		1		1		1		1		1		1		1		1		1
__FIWhereXYValue		__FIWhereXYValue		__FIWhereXYValue		__FIWhereXYValue		__FIWhereXYValue		__FIWhereXYValue		__FIWhereXYValue		__FIWhereXYValue		__FIWhereXYValue		__FIWhereXYValue		__FIWhereXYValue		__FIWhereXYValue		__FIWhereXYValue		__FIWhereXYValue		__FIWhereXYValue		__FIWhereXYValue		__FIWhereXYValue		__FIWhereXYValue		__FIWhereXYValue		__FIWhereXYValue		__FIWhereXYValue		__FIWhereXYValue		__FIWhereXYValue		__FIWhereXYValue		__FIWhereXYValue
0		0		0		0		0		0		0		0		0		0		0		0		0		0		0		0		0		0		0		0		0		0		0		0		0
__FIPermitExtrapolation		__FIPermitExtrapolation		__FIPermitExtrapolation		__FIPermitExtrapolation		__FIPermitExtrapolation		__FIPermitExtrapolation		__FIPermitExtrapolation		__FIPermitExtrapolation		__FIPermitExtrapolation		__FIPermitExtrapolation		__FIPermitExtrapolation		__FIPermitExtrapolation		__FIPermitExtrapolation		__FIPermitExtrapolation		__FIPermitExtrapolation		__FIPermitExtrapolation		__FIPermitExtrapolation		__FIPermitExtrapolation		__FIPermitExtrapolation		__FIPermitExtrapolation		__FIPermitExtrapolation		__FIPermitExtrapolation		__FIPermitExtrapolation		__FIPermitExtrapolation		__FIPermitExtrapolation
0		0		0		0		0		0		0		0		0		0		0		0		0		0		0		0		0		0		0		0		0		0		0		0		0
__FIDetectSuspectData		__FIDetectSuspectData		__FIDetectSuspectData		__FIDetectSuspectData		__FIDetectSuspectData		__FIDetectSuspectData		__FIDetectSuspectData		__FIDetectSuspectData		__FIDetectSuspectData		__FIDetectSuspectData		__FIDetectSuspectData		__FIDetectSuspectData		__FIDetectSuspectData		__FIDetectSuspectData		__FIDetectSuspectData		__FIDetectSuspectData		__FIDetectSuspectData		__FIDetectSuspectData		__FIDetectSuspectData		__FIDetectSuspectData		__FIDetectSuspectData		__FIDetectSuspectData		__FIDetectSuspectData		__FIDetectSuspectData		__FIDetectSuspectData
0		0		0		0		0		0		0		0		0		0		0		0		0		0		0		0		0		0		0		0		0		0		0		0		0
__FIPreFit		__FIPreFit		__FIPreFit		__FIPreFit		__FIPreFit		__FIPreFit		__FIPreFit		__FIPreFit		__FIPreFit		__FIPreFit		__FIPreFit		__FIPreFit		__FIPreFit		__FIPreFit		__FIPreFit		__FIPreFit		__FIPreFit		__FIPreFit		__FIPreFit		__FIPreFit		__FIPreFit		__FIPreFit		__FIPreFit		__FIPreFit		__FIPreFit
-1		-1		-1		-1		-1		-1		-1		-1		-1		-1		-1		-1		-1		-1		-1		-1		-1		-1		-1		-1		-1		-1		-1		-1		-1
__FIParamValueOrig		__FIParamValueOrig		__FIParamValueOrig		__FIParamValueOrig		__FIParamValueOrig		__FIParamValueOrig		__FIParamValueOrig		__FIParamValueOrig		__FIParamValueOrig		__FIParamValueOrig		__FIParamValueOrig		__FIParamValueOrig		__FIParamValueOrig		__FIParamValueOrig		__FIParamValueOrig		__FIParamValueOrig		__FIParamValueOrig		__FIParamValueOrig		__FIParamValueOrig		__FIParamValueOrig		__FIParamValueOrig		__FIParamValueOrig		__FIParamValueOrig		__FIParamValueOrig		__FIParamValueOrig
0		0		0		0		0		0		0		0		0		0		0		0		0		0		0		0		0		0		0		0		0		0		0		0		0
100		100		100		100		100		100		100		100		100		100		100		100		100		100		100		100		100		100		100		100		100		100		100		100		100
0		0		0		0		0		0		0		0		0		0		0		0		0		0		0		0		0		0		0		0		0		0		0		0		0
0		0		0		0		0		0		0		0		0		0		0		0		0		0		0		0		0		0		0		0		0		0		0		0		0
__FIParamLocked		__FIParamLocked		__FIParamLocked		__FIParamLocked		__FIParamLocked		__FIParamLocked		__FIParamLocked		__FIParamLocked		__FIParamLocked		__FIParamLocked		__FIParamLocked		__FIParamLocked		__FIParamLocked		__FIParamLocked		__FIParamLocked		__FIParamLocked		__FIParamLocked		__FIParamLocked		__FIParamLocked		__FIParamLocked		__FIParamLocked		__FIParamLocked		__FIParamLocked		__FIParamLocked		__FIParamLocked
0		0		0		0		0		0		0		0		0		0		0		0		0		0		0		0		0		0		0		0		0		0		0		0		0
0		0		0		0		0		0		0		0		0		0		0		0		0		0		0		0		0		0		0		0		0		0		0		0		0
0		0		0		0		0		0		0		0		0		0		0		0		0		0		0		0		0		0		0		0		0		0		0		0		0
0		0		0		0		0		0		0		0		0		0		0		0		0		0		0		0		0		0		0		0		0		0		0		0		0
__FIParamValueFitted		__FIParamValueFitted		__FIParamValueFitted		__FIParamValueFitted		__FIParamValueFitted		__FIParamValueFitted		__FIParamValueFitted		__FIParamValueFitted		__FIParamValueFitted		__FIParamValueFitted		__FIParamValueFitted		__FIParamValueFitted		__FIParamValueFitted		__FIParamValueFitted		__FIParamValueFitted		__FIParamValueFitted		__FIParamValueFitted		__FIParamValueFitted		__FIParamValueFitted		__FIParamValueFitted		__FIParamValueFitted		__FIParamValueFitted		__FIParamValueFitted		__FIParamValueFitted		__FIParamValueFitted
-129568		-3243.24		72.6845		-19354.4		69.17		68.45		58.61		-5725.03		86.6208		617.248		67.417		2161.02		99.5843		88.8397		7006.91		66.95		61.1		63.29		268.832		1748.62		3521.55		-12689.7		-115114		88.6688		98.36
2149.25		643.517		1053.08		584.814		75.9523		73.9849		64.421		2246.03		-38.4471		683.897		160.658		2413.25		10364.5		94.6946		7372.59		77.2105		66.065		68.4562		359.791		2145.35		3868.98		1020.49		557.83		101.245		123.941
47411.4		1.82368e+10		51980		2.51572e+08		-12696.5		-13964.8		-15865.4		1.82153e+07		-114850		104.773		28953.8		5593.14		78903.4		61.5288		739.852		-15843.4		-15511.8		-42308.5		10361.8		-8594.76		7783.09		3.6374e+08		1.48812e+09		379.663		-1691.3
13.2739		0.268678		-7.21162		0.515158		1		1		1		0.437767		-4.0937		14.9135		14.7408		3.54711		-6.07665		-177.16		87.2891		1		1		1		-12.4104		1		232.17		0.501835		0.618967		-16.4017		1
__FIParamStdErr		__FIParamStdErr		__FIParamStdErr		__FIParamStdErr		__FIParamStdErr		__FIParamStdErr		__FIParamStdErr		__FIParamStdErr		__FIParamStdErr		__FIParamStdErr		__FIParamStdErr		__FIParamStdErr		__FIParamStdErr		__FIParamStdErr		__FIParamStdErr		__FIParamStdErr		__FIParamStdErr		__FIParamStdErr		__FIParamStdErr		__FIParamStdErr		__FIParamStdErr		__FIParamStdErr		__FIParamStdErr		__FIParamStdErr		__FIParamStdErr
0		0		0		0		0		0		0		0		0		0		0		0		0		0		0		0		0		0		0		0		0		0		0		0		0
0		0		0		0		4.49423e+307		4.49423e+307		4.49423e+307		0		0		0		0		0		0		0		0		4.49423e+307		4.49423e+307		4.49423e+307		0		0		0		0		0		0		0
0		0		0		0		0		0		0		0		0		0		0		0		0		0		0		0		0		0		0		0		0		0		0		0		0
0		0		0		0		0		0		0		0		0		0		0		0		0		0		0		0		0		0		0		0		0		0		0		0		0
__FIParamConfInt95		__FIParamConfInt95		__FIParamConfInt95		__FIParamConfInt95		__FIParamConfInt95		__FIParamConfInt95		__FIParamConfInt95		__FIParamConfInt95		__FIParamConfInt95		__FIParamConfInt95		__FIParamConfInt95		__FIParamConfInt95		__FIParamConfInt95		__FIParamConfInt95		__FIParamConfInt95		__FIParamConfInt95		__FIParamConfInt95		__FIParamConfInt95		__FIParamConfInt95		__FIParamConfInt95		__FIParamConfInt95		__FIParamConfInt95		__FIParamConfInt95		__FIParamConfInt95		__FIParamConfInt95
0		0		0		0		0		0		0		0		0		0		0		0		0		0		0		0		0		0		0		0		0		0		0		0		0
0		0		0		0		4.49423e+307		4.49423e+307		4.49423e+307		0		0		0		0		0		0		0		0		4.49423e+307		4.49423e+307		4.49423e+307		0		0		0		0		0		0		0
0		0		0		0		0		0		0		0		0		0		0		0		0		0		0		0		0		0		0		0		0		0		0		0		0
0		0		0		0		0		0		0		0		0		0		0		0		0		0		0		0		0		0		0		0		0		0		0		0		0
__FIReturnnInfoValue		__FIReturnnInfoValue		__FIReturnnInfoValue		__FIReturnnInfoValue		__FIReturnnInfoValue		__FIReturnnInfoValue		__FIReturnnInfoValue		__FIReturnnInfoValue		__FIReturnnInfoValue		__FIReturnnInfoValue		__FIReturnnInfoValue		__FIReturnnInfoValue		__FIReturnnInfoValue		__FIReturnnInfoValue		__FIReturnnInfoValue		__FIReturnnInfoValue		__FIReturnnInfoValue		__FIReturnnInfoValue		__FIReturnnInfoValue		__FIReturnnInfoValue		__FIReturnnInfoValue		__FIReturnnInfoValue		__FIReturnnInfoValue		__FIReturnnInfoValue		__FIReturnnInfoValue
61582		0		229.193		0		1364.25		667.232		486.054		0		1308.34		10362.6		2334.64		71568.9		575.392		106.515		554032		1323.54		306.242		352.451		6152.01		0		228466		0		0		319.441		0
71		0		20		0		25		20		36		0		3		42		15		12		22		59		36		77		40		33		54		0		65		0		0		43		0
1222435638		1222435637		1222435637		1222435636		1222435634		1222435634		1222435633		1222435642		1222435642		1222435641		1222435641		1222435638		1222435638		1222435637		1222435637		1222435634		1222435633		1222435633		1222435642		1222435642		1222435641		1222435639		1222435638		1222435638		1222435637
13		13		13		13		13		13		13		13		13		13		13		13		13		13		13		13		13		13		13		13		13		13		13		13		13
4		4		4		4		4		4		4		4		4		4		4		4		4		4		4		4		4		4		4		4		4		4		4		4		4
9		9		9		9		9		9		9		9		9		9		9		9		9		9		9		9		9		9		9		9		9		9		9		9		9
1.7305		0		1.74364		0		1.29907		1.10886		1.4134		0		4.49423e+307		1.7403		1.73789		1.75747		1.75422		2.23684		3.23014		1.31821		1.25179		1.31873		1.74037		0		2.56874		0		0		1.75622		0
0		0		0		0		0.339983		-0.429773		0.311672		0		0		0		0		0		0		0		0		-1.07496		0.4876		-0.14344		0		0		0		0		0		0		0
0		0		0		0		-0.0105302		-0.142138		0.213091		0		0		0		0		0		0		0		0		0.131411		0.116619		-0.0514479		0		0		0		0		0		0		0
0		0		0		0		0.000110885		0.0202031		0.0454077		0		0		0		0		0		0		0		0		0.0172689		0.0136		0.00264689		0		0		0		0		0		0		0
0		0		0		0		2.10219e+06		2.06422e+06		1.74763e+06		0		0		0		0		0		0		0		0		1.99016e+06		1.82774e+06		2.24256e+06		0		0		0		0		0		0		0
0		0		0		0		129.964		235.93		253.274		0		0		0		0		0		0		0		0		120.429		424.951		398.472		0		0		0		0		0		0		0
1222435638		1222435637		1222435637		1222435636		1222435634		1222435634		1222435633		1222435642		1222435642		1222435641		1222435641		1222435638		1222435638		1222435637		1222435637		1222435634		1222435633		1222435633		1222435642		1222435642		1222435641		1222435639		1222435638		1222435638		1222435637
__FIFitCount		__FIFitCount		__FIFitCount		__FIFitCount		__FIFitCount		__FIFitCount		__FIFitCount		__FIFitCount		__FIFitCount		__FIFitCount		__FIFitCount		__FIFitCount		__FIFitCount		__FIFitCount		__FIFitCount		__FIFitCount		__FIFitCount		__FIFitCount		__FIFitCount		__FIFitCount		__FIFitCount		__FIFitCount		__FIFitCount		__FIFitCount		__FIFitCount
1		1		1		1		1		1		1		1		1		1		1		1		1		1		1		1		1		1		1		1		1		1		1		1		1
[truncated: 206 more columns]

## Sheet: Comparison of EC50 values
Dose	Xlfit_C	SDRS_C		Xlfit_C where A>0, B <33000	SDRS_C
1598_g_at	1317.02	1304.37		1317.02	1304.37
1773_at	3373.91	3344.37		3373.91	3344.37
1861_at	793.866	824.367		793.866	824.367
200027_at	36.1337	40.046		36.1337	40.046
200047_s_at	9798.81	9644.37		9798.81	9644.37
200064_at	41.0268	40.046		41.0268	40.046
200065_s_at	257.546	291.836		257.546	291.836
200085_s_at	1199.73	464.367		1199.73	464.367
200609_s_at	31993	18044.4		31993	18044.4
200612_s_at	43.9379	47.254		43.9379	47.254
200620_at	215.196	209.592		215.196	209.592
200673_at	7.5134e+06	10904.4
200689_x_at	9090.51	7664.37		9090.51	7664.37
200719_at	48717.5	16604.4
200722_s_at	16920.4	1724.37		16920.4	1724.37
200748_s_at	106.981	91.615		106.981	91.615
200785_s_at	10289.6	10484.4		10289.6	10484.4
200789_at	1068.25	344.367		1068.25	344.367
200799_at	4.30877e+06	9584.37
200804_at	1018.48	884.367		1018.48	884.367
200808_s_at	38658.5	18764.4		38658.5	18764.4
200815_s_at	63.1599	65.796		63.1599	65.796
200821_at	16987.7	10664.4		16987.7	10664.4
200839_s_at	764.1	1304.37		764.1	1304.37
200848_at	43444.8	16604.4
200886_s_at	1253.58	1604.37		1253.58	1604.37
200906_s_at	54659.2	15824.4
200921_s_at	3520.65	3764.37		3520.65	3764.37
200927_s_at	9543.68	8804.37		9543.68	8804.37
200943_at	8292.05	6824.37		8292.05	6824.37
200945_s_at	117.765	108.105		117.765	108.105
200947_s_at	22167.9	2924.37		22167.9	2924.37
200950_at	9530.08	9104.37		9530.08	9104.37
200972_at	10035.5	9464.37		10035.5	9464.37
200978_at	9401.1	8384.37		9401.1	8384.37
200981_x_at	76.1981	65.796		76.1981	65.796
201010_s_at	36225.2	6284.37
201041_s_at	288.134	247.319		288.134	247.319
201047_x_at	43.7258	47.254		43.7258	47.254
201061_s_at	3608.76	764.367		3608.76	764.367
201077_s_at	114.822	108.105		114.822	108.105
201079_at	4880.39	5264.37		4880.39	5264.37
201083_s_at	4.33382e+06	11924.4
201084_s_at	6603.05	6344.37		6603.05	6344.37
201101_s_at	10715.9	7484.37		10715.9	7484.37
201129_at	11976.1	12704.4		11976.1	12704.4
201130_s_at	238.968	209.592		238.968	209.592
201131_s_at	98637.7	15164.4
201139_s_at	29782.8	18164.4		29782.8	18164.4
201149_s_at	19067.3	13004.4		19067.3	13004.4
201153_s_at	10001.2	10064.4		10001.2	10064.4
201190_s_at	5791.04	5564.37		5791.04	5564.37
201198_s_at	11840.7	10904.4		11840.7	10904.4
201205_at	3866.61	4484.37		3866.61	4484.37
201214_s_at	41.4168	40.046		41.4168	40.046
201226_at	759.577	644.367		759.577	644.367
201244_s_at	79461.9	14744.4
201245_s_at	359.214	344.367		359.214	344.367
201250_s_at	1346.89	1004.37		1346.89	1004.37
201269_s_at	5.38118	5.495		5.38118	5.495
201311_s_at	357.341	344.367		357.341	344.367
201347_x_at	2182.08	944.367		2182.08	944.367
201360_at	1507.03	584.367		1507.03	584.367
201390_s_at	106.417	77.64		106.417	77.64
201402_at	40902	17144.4		40902	17144.4
201432_at	190.82	177.621		190.82	177.621
201444_s_at	5127.71	5384.37		5127.71	5384.37
201456_s_at	10534.7	10964.4		10534.7	10964.4
201467_s_at	123.991	127.564		123.991	127.564
201483_s_at	10859.9	2564.37		10859.9	2564.37
201492_s_at	39518.2	18284.4
201494_at	1.39183e+08	10904.4
201506_at	32011.6	18044.4		32011.6	18044.4
201516_at	30.53	28.76		30.53	28.76
201535_at	9284.32	8264.37		9284.32	8264.37
201538_s_at	212.559	209.592		212.559	209.592
201551_s_at	1041.48	944.367		1041.48	944.367
201554_x_at	10059.6	9464.37		10059.6	9464.37
201580_s_at	336236	4064.37		336236	4064.37
201603_at	225.708	209.592		225.708	209.592
201616_s_at	3579.38	1904.37		3579.38	1904.37
201620_at	133.32	108.105		133.32	108.105
201625_s_at	4307.01	4604.37		4307.01	4604.37
201629_s_at	303.922	247.319		303.922	247.319
201659_s_at	422.241	344.367		422.241	344.367
201685_s_at	110.094	91.615		110.094	91.615
201765_s_at	128.593	127.564		128.593	127.564
201773_at	43278.7	17564.4
201778_s_at	9361.65	9584.37		9361.65	9584.37
201828_x_at	9.1633	3.344		9.1633	3.344
201864_at	1025.58	944.367		1025.58	944.367
201882_x_at	603449	12464.4		603449	12464.4
201887_at	11822.9	12884.4		11822.9	12884.4
201895_at	11165.9	12044.4		11165.9	12044.4
201908_at	39314.8	7664.37		39314.8	7664.37
201920_at	13183.1	7004.37		13183.1	7004.37
201940_at	62853	6764.37		62853	6764.37
201941_at	88753.3	1424.37		88753.3	1424.37
201942_s_at	4250.27	3584.37		4250.27	3584.37
201947_s_at	40403.5	18044.4
201956_s_at	34.0019	24.373		34.0019	24.373
201966_at	13493.9	11444.4		13493.9	11444.4
201999_s_at	3214.52	3044.37		3214.52	3044.37
202003_s_at	14250.7	4064.37		14250.7	4064.37
202005_at	14147.7	14264.4		14147.7	14264.4
202028_s_at	16439.8	9764.37		16439.8	9764.37
202052_s_at	868333	2744.37		868333	2744.37
202061_s_at	302.918	344.367		302.918	344.367
202067_s_at	18400.8	2744.37		18400.8	2744.37
202068_s_at	2169.83	2204.37		2169.83	2204.37
202081_at	1059.11	1004.37		1059.11	1004.37
202092_s_at	576.56	584.367		576.56	584.367
202096_s_at	2054.42	944.367		2054.42	944.367
202107_s_at	9904.76	9764.37		9904.76	9764.37
202113_s_at	8659.93	8564.37		8659.93	8564.37
202203_s_at	203900	6764.37
202250_s_at	189720	12404.4
202261_at	1053.89	884.367		1053.89	884.367
202273_at	10087.5	10244.4		10087.5	10244.4
202329_at	2988.01	2624.37		2988.01	2624.37
202332_at	10124	10364.4		10124	10364.4
202336_s_at	4743.63	5144.37		4743.63	5144.37
202338_at	67.7909	65.796		67.7909	65.796
202347_s_at	37.3576	33.937		37.3576	33.937
202351_at	21353.7	7844.37		21353.7	7844.37
202358_s_at	12300.4	2144.37		12300.4	2144.37
202359_s_at	255393	12824.4
202393_s_at	2.03481e+09	12104.4
202431_s_at	9697.65	8444.37		9697.65	8444.37
202434_s_at	191.184	177.621		191.184	177.621
202435_s_at	780.467	584.367		780.467	584.367
202436_s_at	224.086	209.592		224.086	209.592
202437_s_at	781.74	764.367		781.74	764.367
202444_s_at	8454.54	4424.37		8454.54	4424.37
202475_at	9954.97	9884.37		9954.97	9884.37
202482_x_at	38189.8	17684.4		38189.8	17684.4
202521_at	48.1517	55.76		48.1517	55.76
202551_s_at	65704.9	17804.4
202594_at	42.5148	47.254		42.5148	47.254
202631_s_at	331071	6764.37
202665_s_at	544210	13304.4		544210	13304.4
202698_x_at	7749.27	7484.37		7749.27	7484.37
202736_s_at	125.122	127.564		125.122	127.564
202761_s_at	108.687	108.105		108.687	108.105
202765_s_at	10366.5	10544.4		10366.5	10544.4
202771_at	269835	14744.4
202794_at	10239.1	9644.37		10239.1	9644.37
202801_at	3.38565e+07	11264.4
202820_at	41332.7	18164.4
202825_at	296.756	247.319		296.756	247.319
202828_s_at	41207.8	18464.4		41207.8	18464.4
202859_x_at	1.15881e+06	13004.4		1.15881e+06	13004.4
202861_at	1.68619e+06	9764.37		1.68619e+06	9764.37
202873_at	961.246	764.367		961.246	764.367
202928_s_at	47.389	55.76		47.389	55.76
202929_s_at	115.789	108.105		115.789	108.105
202935_s_at	140.749	108.105		140.749	108.105
202938_x_at	6.33287e+06	8684.37		6.33287e+06	8684.37
202985_s_at	12707.7	14204.4		12707.7	14204.4
203013_at	4602.12	3044.37		4602.12	3044.37
203022_at	11059.6	1304.37		11059.6	1304.37
203025_at	42.952	47.254		42.952	47.254
203033_x_at	1039.98	944.367		1039.98	944.367
203038_at	1137.48	1484.37		1137.48	1484.37
203041_s_at	532.091	644.367		532.091	644.367
203052_at	66863.1	17264.4
203054_s_at	8.47331e+07	11444.4
203069_at	4.93165e+06	3224.37		4.93165e+06	3224.37
203083_at	283873	11744.4		283873	11744.4
203095_at	9553.05	9104.37		9553.05	9104.37
203126_at	7482.47	824.367		7482.47	824.367
203136_at	5610.14	5984.37		5610.14	5984.37
203137_at	10727.5	11024.4		10727.5	11024.4
203142_s_at	3729.55	4304.37		3729.55	4304.37
203152_at	117.594	108.105		117.594	108.105
203168_at	108188	16004.4		108188	16004.4
203172_at	3732.92	4064.37		3732.92	4064.37
203180_at	660.192	644.367		660.192	644.367
203190_at	96.3091	91.615		96.3091	91.615
203196_at	17086.8	11024.4		17086.8	11024.4
203198_at	12687.5	12404.4		12687.5	12404.4
203204_s_at	4043.41	3944.37		4043.41	3944.37
203217_s_at	692.072	644.367		692.072	644.367
203237_s_at	79140.5	16244.4		79140.5	16244.4
203250_at	41135.8	17144.4
203256_at	2453.19	824.367		2453.19	824.367
203259_s_at	40.8162	40.046		40.8162	40.046
203272_s_at	35270.2	18164.4		35270.2	18164.4
203282_at	43736	2684.37		43736	2684.37
203304_at	3341.27	1544.37		3341.27	1544.37
203307_at	62150.6	16604.4		62150.6	16604.4
203339_at	14010.8	15344.4		14010.8	15344.4
203360_s_at	339.623	291.836		339.623	291.836
203438_at	29219.4	4484.37		29219.4	4484.37
203445_s_at	1018.76	1124.37		1018.76	1124.37
203484_at	9900.56	9824.37		9900.56	9824.37
203499_at	11625.5	9764.37		11625.5	9764.37
203530_s_at	113.03	91.615		113.03	91.615
203547_at	43926.7	16364.4		43926.7	16364.4
203566_s_at	5.21736e+07	11564.4
203572_s_at	88846.3	15584.4
203581_at	463150	2324.37
203583_at	2431.81	1784.37		2431.81	1784.37
203614_at	12107.1	13004.4		12107.1	13004.4
203627_at	11629.2	12164.4		11629.2	12164.4
203642_s_at	107982	6764.37		107982	6764.37
203676_at	22374.1	2144.37		22374.1	2144.37
203728_at	564507	12464.4		564507	12464.4
203743_s_at	10582.9	6944.37		10582.9	6944.37
203746_s_at	9754.07	9464.37		9754.07	9464.37
203761_at	205.886	209.592		205.886	209.592
203774_at	51.9583	55.76		51.9583	55.76
203792_x_at	51126.6	16304.4		51126.6	16304.4
203795_s_at	4078.75	4604.37		4078.75	4604.37
203817_at	4982.43	2144.37		4982.43	2144.37
203818_s_at	420.366	524.367		420.366	524.367
203824_at	3241.28	2384.37		3241.28	2384.37
203843_at	3440.67	3524.37		3440.67	3524.37
203851_at	92.0465	77.64		92.0465	77.64
203878_s_at	34809.7	16244.4		34809.7	16244.4
203918_at	54823.4	16604.4		54823.4	16604.4
203952_at	6.78136e+07	12164.4
203964_at	69.9097	77.64		69.9097	77.64
203973_s_at	167278	15164.4
204016_at	5639.81	3764.37		5639.81	3764.37
204100_at	11335.4	11384.4		11335.4	11384.4
204107_at	8934.55	7124.37		8934.55	7124.37
204135_at	2.06536e+06	11084.4		2.06536e+06	11084.4
204137_at	10662.1	10784.4		10662.1	10784.4
204149_s_at	372.079	404.367		372.079	404.367
204265_s_at	224248	13544.4		224248	13544.4
204295_at	216065	1484.37		216065	1484.37
204303_s_at	62787.2	16724.4		62787.2	16724.4
204308_s_at	187927	3764.37		187927	3764.37
204322_at	35269	16244.4		35269	16244.4
204328_at	4694.31	4844.37		4694.31	4844.37
204332_s_at	25476.2	4964.37		25476.2	4964.37
204334_at	5258.21	4604.37		5258.21	4604.37
204417_at	1746.24	1844.37		1746.24	1844.37
204446_s_at	68800.6	1484.37		68800.6	1484.37
204477_at	10499.1	10844.4		10499.1	10844.4
204480_s_at	1026.03	944.367		1026.03	944.367
204514_at	505944	12284.4		505944	12284.4
204535_s_at	12596.2	12944.4		12596.2	12944.4
204564_at	31192.4	18764.4		31192.4	18764.4
204571_x_at	41.8213	40.046		41.8213	40.046
204592_at	13150.4	10484.4		13150.4	10484.4
204602_at	287556	1124.37		287556	1124.37
204640_s_at	115.093	108.105		115.093	108.105
204653_at	3183.08	1904.37		3183.08	1904.37
204684_at	3.17865e+06	8384.37
204724_s_at	38048.4	16724.4		38048.4	16724.4
204746_s_at	10157.8	10964.4		10157.8	10964.4
204776_at	5.35157e+06	10724.4		5.35157e+06	10724.4
204780_s_at	7791.57	6944.37		7791.57	6944.37
204878_s_at	39372.1	19184.4		39372.1	19184.4
204899_s_at	2.11283e+07	13244.4
204900_x_at	126.217	150.526		126.217	150.526
204972_at	16.4611	20.655		16.4611	20.655
204974_at	67814.3	19124.4
204985_s_at	405.653	524.367		405.653	524.367
205003_at	45031.3	18284.4
205020_s_at	57805.5	4304.37		57805.5	4304.37
205032_at	7830.92	7664.37		7830.92	7664.37
205067_at	721.617	1304.37		721.617	1304.37
205087_at	11493.7	12344.4		11493.7	12344.4
205088_at	5573.5	6344.37		5573.5	6344.37
205105_at	40006.1	18284.4
205125_at	48.99	65.796		48.99	65.796
205126_at	8703.51	7484.37		8703.51	7484.37
205128_x_at	12711.2	12044.4		12711.2	12044.4
205141_at	115.645	177.621		115.645	177.621
205156_s_at	13254.4	13244.4		13254.4	13244.4
205158_at	3110.22	1844.37		3110.22	1844.37
205189_s_at	3141.12	2924.37		3141.12	2924.37
205193_at	8275.61	4904.37		8275.61	4904.37
205211_s_at	10243.7	10364.4		10243.7	10364.4
205245_at	50270.3	15944.4		50270.3	15944.4
205291_at	137912	14204.4		137912	14204.4
205303_at	3.19886e+07	6764.37		3.19886e+07	6764.37
205305_at	186.402	177.621		186.402	177.621
205320_at	59437.9	19004.4
205321_at	13191.6	3104.37		13191.6	3104.37
205322_s_at	9257.48	9164.37		9257.48	9164.37
205412_at	794813	8084.37
205417_s_at	2.0692e+06	1064.37		2.0692e+06	1064.37
205448_s_at	5910.96	4064.37		5910.96	4064.37
205456_at	273.715	247.319		273.715	247.319
205479_s_at	21440.3	11144.4		21440.3	11144.4
205507_at	1.89424e+07	12284.4		1.89424e+07	12284.4
205508_at	34964	16484.4		34964	16484.4
205510_s_at	1.76549e+07	5744.37
205521_at	9815.99	9704.37		9815.99	9704.37
205536_at	8723.81	3164.37		8723.81	3164.37
205538_at	1.10546e+08	13964.4
205543_at	74.0246	77.64		74.0246	77.64
205575_at	879.981	1004.37		879.981	1004.37
205579_at	1540.75	1844.37		1540.75	1844.37
205580_s_at	2.02558e+06	12824.4
205627_at	110.955	77.64		110.955	77.64
205710_at	493715	13724.4		493715	13724.4
205720_at	50795.8	15824.4		50795.8	15824.4
205749_at	2.33633e+06	15344.4		2.33633e+06	15344.4
205805_s_at	1128.54	1124.37		1128.54	1124.37
205831_at	1.17941e+08	7484.37		1.17941e+08	7484.37
205869_at	40827.9	18044.4		40827.9	18044.4
205912_at	1.13745e+06	6104.37		1.13745e+06	6104.37
205913_at	53184.7	16544.4		53184.7	16544.4
205942_s_at	4635.57	3344.37		4635.57	3344.37
205957_at	1842.62	1784.37		1842.62	1784.37
205985_x_at	9.68316e+06	2444.37
206137_at	45799.1	16604.4		45799.1	16604.4
206146_s_at	57479.3	18764.4
206148_at	14464.9	14264.4		14464.9	14264.4
206154_at	1447.99	1724.37		1447.99	1724.37
206171_at	953530	13184.4		953530	13184.4
206238_s_at	29844	17444.4		29844	17444.4
206281_at	199988	12704.4		199988	12704.4
206338_at	15212.1	15404.4		15212.1	15404.4
206340_at	82.8356	77.64		82.8356	77.64
206362_x_at	71105.2	18644.4
206430_at	2.99606e+07	14444.4
206436_at	495642	9524.37		495642	9524.37
206463_s_at	287243	13484.4		287243	13484.4
206475_x_at	47426	19184.4		47426	19184.4
206501_x_at	75679	15044.4		75679	15044.4
206549_at	729.383	884.367		729.383	884.367
206611_at	349.918	291.836		349.918	291.836
206694_at	11447.9	12344.4		11447.9	12344.4
206697_s_at	12987.8	14204.4		12987.8	14204.4
206724_at	2922.4	644.367		2922.4	644.367
206725_x_at	1.72572e+06	8684.37		1.72572e+06	8684.37
206755_at	2437.68	2144.37		2437.68	2144.37
206763_at	13360.6	13484.4		13360.6	13484.4
206764_x_at	12705.2	16244.4		12705.2	16244.4
206781_at	43466.1	19124.4		43466.1	19124.4
206785_s_at	5.29866e+06	10484.4
206801_at	29925.6	19004.4		29925.6	19004.4
206831_s_at	3.33754e+08	6104.37
206922_at	35095.7	18464.4		35095.7	18464.4
206923_at	9980.84	9884.37		9980.84	9884.37
206925_at	6445.04	5924.37		6445.04	5924.37
206955_at	8940.16	7364.37		8940.16	7364.37
206990_at	33237.5	17204.4		33237.5	17204.4
206994_at	3.44829e+07	11744.4
206998_x_at	1408.34	1964.37		1408.34	1964.37
207004_at	35318.5	17144.4		35318.5	17144.4
207020_at	8.18351e+07	11504.4
207051_at	41.3792	40.046		41.3792	40.046
207079_s_at	1739.42	1904.37		1739.42	1904.37
207093_s_at	135.384	150.526		135.384	150.526
207136_at	169054	16064.4		169054	16064.4
207168_s_at	11858.5	6524.37		11858.5	6524.37
207180_s_at	46.8383	55.76		46.8383	55.76
207244_x_at	29980.2	15704.4		29980.2	15704.4
207278_s_at	9821.71	8804.37		9821.71	8804.37
207280_at	75501	15584.4		75501	15584.4
207282_s_at	276872	13964.4		276872	13964.4
207309_at	3353.29	3344.37		3353.29	3344.37
207334_s_at	2.3408e+06	4604.37
207391_s_at	10177.5	10424.4		10177.5	10424.4
207427_at	36872.8	17564.4		36872.8	17564.4
207438_s_at	6102.94	5504.37		6102.94	5504.37
207468_s_at	29555.7	18764.4		29555.7	18764.4
207476_at	35481.6	17564.4		35481.6	17564.4
207479_at	1.57788	1.725		1.57788	1.725
207504_at	15866.8	15404.4		15866.8	15404.4
207507_s_at	6771.12	2744.37		6771.12	2744.37
207525_s_at	10368.4	10664.4		10368.4	10664.4
207555_s_at	51374.9	16124.4		51374.9	16124.4
207634_at	35813.7	17564.4		35813.7	17564.4
207636_at	58383.9	17684.4		58383.9	17684.4
207671_s_at	12426	12644.4		12426	12644.4
207681_at	6746.27	6884.37		6746.27	6884.37
207699_at	36406.9	16604.4		36406.9	16604.4
207714_s_at	106.13	91.615		106.13	91.615
207718_x_at	1262.16	2024.37		1262.16	2024.37
207734_at	3.26875e+06	10844.4		3.26875e+06	10844.4
207767_s_at	36968.6	19004.4		36968.6	19004.4
207774_at	47762	19064.4		47762	19064.4
207782_s_at	3321.29	3344.37		3321.29	3344.37
207783_x_at	9075.09	6824.37		9075.09	6824.37
207784_at	34782.8	15644.4		34782.8	15644.4
207799_x_at	57915.8	17144.4		57915.8	17144.4
207827_x_at	41537.1	18584.4		41537.1	18584.4
207863_at	64930.9	16604.4		64930.9	16604.4
207877_s_at	2.01608e+08	11984.4
207891_s_at	119498	764.367		119498	764.367
207908_at	44.1135	55.76		44.1135	55.76
207957_s_at	30445.8	19544.4		30445.8	19544.4
207965_at	37027.3	17684.4		37027.3	17684.4
208005_at	24062.8	12884.4		24062.8	12884.4
208058_s_at	61899.1	17144.4		61899.1	17144.4
208074_s_at	6.05824e+08	11324.4
208100_x_at	56495.5	16724.4		56495.5	16724.4
208182_x_at	1.69691e+07	3764.37		1.69691e+07	3764.37
208196_x_at	28212.9	17144.4		28212.9	17144.4
208260_at	84136.5	16604.4
208292_at	11287.1	11924.4		11287.1	11924.4
208303_s_at	4312.45	4544.37		4312.45	4544.37
208360_s_at	68569.6	15824.4		68569.6	15824.4
208379_x_at	9.0416e+06	11144.4		9.0416e+06	11144.4
208407_s_at	39.389	40.046		39.389	40.046
208453_s_at	3665.4	344.367		3665.4	344.367
208457_at	7.25681e+06	12044.4		7.25681e+06	12044.4
208499_s_at	87750.5	15824.4
208519_x_at	166543	5024.37		166543	5024.37
208544_at	36144.1	16244.4		36144.1	16244.4
208568_at	145.471	127.564		145.471	127.564
208574_at	9203.46	7904.37		9203.46	7904.37
208579_x_at	108.494	77.64		108.494	77.64
208623_s_at	39.5515	40.046		39.5515	40.046
208645_s_at	7611.67	7664.37		7611.67	7664.37
208671_at	3520.68	3764.37		3520.68	3764.37
208690_s_at	6441.06	6584.37		6441.06	6584.37
208702_x_at	337.062	344.367		337.062	344.367
208763_s_at	353.132	344.367		353.132	344.367
208815_x_at	104.384	77.64		104.384	77.64
208817_at	51623.8	17144.4
208819_at	11532.9	13124.4		11532.9	13124.4
208820_at	113.322	91.615		113.322	91.615
208833_s_at	52070	19184.4
208837_at	9616.73	108.105		9616.73	108.105
208840_s_at	684727	6404.37
208846_s_at	386537	3104.37		386537	3104.37
208849_at	11845.6	12524.4		11845.6	12524.4
208881_x_at	103.602	77.64		103.602	77.64
208900_s_at	52871	11924.4		52871	11924.4
208921_s_at	4288.52	65.796		4288.52	65.796
208937_s_at	22326	10184.4		22326	10184.4
208944_at	6286.45	1424.37		6286.45	1424.37
208970_s_at	110.181	91.615		110.181	91.615
208978_at	56.4402	55.76		56.4402	55.76
209020_at	285748	2324.37		285748	2324.37
209038_s_at	18884.6	12044.4		18884.6	12044.4
209070_s_at	47.442	55.76		47.442	55.76
209104_s_at	47.88	55.76		47.88	55.76
209132_s_at	6015.71	704.367		6015.71	704.367
209139_s_at	107.464	108.105		107.464	108.105
209147_s_at	282.488	209.592		282.488	209.592
209149_s_at	3506.48	4604.37		3506.48	4604.37
209194_at	5.06176e+06	8984.37
209287_s_at	43842.7	17264.4		43842.7	17264.4
209296_at	42838	17144.4
209303_at	92116.4	5144.37		92116.4	5144.37
209306_s_at	8241.8	2264.37		8241.8	2264.37
209310_s_at	91.1944	91.615		91.1944	91.615
209329_x_at	2834.02	2144.37		2834.02	2144.37
209337_at	10888.1	11384.4		10888.1	11384.4
209372_x_at	12829.9	10964.4		12829.9	10964.4
209378_s_at	237.391	209.592		237.391	209.592
209398_at	74759	3884.37		74759	3884.37
209415_at	36545.2	18164.4		36545.2	18164.4
209435_s_at	342066	8384.37		342066	8384.37
209449_at	76735.5	15824.4
209496_at	10579.8	11024.4		10579.8	11024.4
209581_at	17404.7	3524.37		17404.7	3524.37
209590_at	11065.4	11144.4		11065.4	11144.4
209624_s_at	3258.72	3044.37		3258.72	3044.37
209639_s_at	29287.8	18464.4		29287.8	18464.4
209643_s_at	5506.63	6164.37		5506.63	6164.37
209655_s_at	78724.3	15164.4
209657_s_at	1872.79	1964.37		1872.79	1964.37
209661_at	11014.7	11504.4		11014.7	11504.4
209669_s_at	2176.84	108.105		2176.84	108.105
209671_x_at	105.673	77.64		105.673	77.64
209690_s_at	20.7763	17.504		20.7763	17.504
209718_at	58075.9	18044.4
209721_s_at	103788	14864.4		103788	14864.4
209730_at	12179.9	13424.4		12179.9	13424.4
209769_s_at	35205.3	17564.4		35205.3	17564.4
209803_s_at	1296.52	1544.37		1296.52	1544.37
209835_x_at	796.785	644.367		796.785	644.367
209876_at	306559	13484.4		306559	13484.4
209896_s_at	121.587	108.105		121.587	108.105
209903_s_at	52748.8	17144.4
209911_x_at	1242.8	404.367		1242.8	404.367
209957_s_at	51787.3	16244.4		51787.3	16244.4
209979_at	37170.7	18044.4		37170.7	18044.4
209992_at	446.832	524.367		446.832	524.367
210005_at	11203.9	11744.4		11203.9	11744.4
210044_s_at	392378	14204.4		392378	14204.4
210046_s_at	2195.8	344.367		2195.8	344.367
210053_at	41.4246	40.046		41.4246	40.046
210056_at	14376.7	9644.37		14376.7	9644.37
210183_x_at	1.6421	1.725		1.6421	1.725
210185_at	21682.7	12584.4		21682.7	12584.4
210271_at	14265.4	13724.4		14265.4	13724.4
210299_s_at	2.23183e+06	12044.4		2.23183e+06	12044.4
210312_s_at	120.646	127.564		120.646	127.564
210325_at	173.34	177.621		173.34	177.621
210335_at	2878.89	2684.37		2878.89	2684.37
210356_x_at	437.27	464.367		437.27	464.367
210456_at	65675.4	16904.4
210471_s_at	13867.6	11684.4		13867.6	11684.4
210499_s_at	55566.6	16784.4		55566.6	16784.4
210539_at	2.00894e+06	11984.4		2.00894e+06	11984.4
210583_at	54331.4	16004.4		54331.4	16004.4
210615_at	399.318	464.367		399.318	464.367
210647_x_at	592260	13304.4		592260	13304.4
210674_s_at	11792.7	8264.37		11792.7	8264.37
210677_at	87792	884.367		87792	884.367
210680_s_at	4250.37	2084.37		4250.37	2084.37
210738_s_at	26773.7	10364.4		26773.7	10364.4
210783_x_at	13994.1	14864.4		13994.1	14864.4
210794_s_at	35602.7	17684.4		35602.7	17684.4
210827_s_at	36531.1	18044.4
210949_s_at	876.832	404.367		876.832	404.367
210981_s_at	12947.8	13724.4		12947.8	13724.4
211005_at	95895.9	11204.4		95895.9	11204.4
211016_x_at	611.817	524.367		611.817	524.367
211047_x_at	229.533	55.76		229.533	55.76
211060_x_at	21780	6764.37		21780	6764.37
211066_x_at	81860.7	16004.4		81860.7	16004.4
211067_s_at	42483.9	17684.4		42483.9	17684.4
211120_x_at	41703.1	17564.4		41703.1	17564.4
211128_at	1.79752e+08	6104.37		1.79752e+08	6104.37
211138_s_at	43128.5	19004.4		43128.5	19004.4
211145_x_at	165.271	65.796		165.271	65.796
211167_s_at	37261.6	17144.4		37261.6	17144.4
211208_s_at	1.13305e+07	12944.4
211221_at	9.89053e+06	11444.4		9.89053e+06	11444.4
211225_at	12557.3	12704.4		12557.3	12704.4
211253_x_at	1090.42	1184.37		1090.42	1184.37
211313_s_at	40361.8	17144.4		40361.8	17144.4
211318_s_at	10297.9	11144.4		10297.9	11144.4
211326_x_at	1268	1184.37		1268	1184.37
211327_x_at	20.9604	20.655		20.9604	20.655
211350_s_at	263.452	291.836		263.452	291.836
211397_x_at	6874.38	4784.37		6874.38	4784.37
211399_at	58862.9	18044.4		58862.9	18044.4
211429_s_at	40221.7	16604.4		40221.7	16604.4
211433_x_at	4574.33	4964.37		4574.33	4964.37
211458_s_at	39.7875	40.046		39.7875	40.046
211474_s_at	42.4402	47.254		42.4402	47.254
211496_s_at	1.13896e+06	5444.37		1.13896e+06	5444.37
211500_at	17984.9	12044.4		17984.9	12044.4
211517_s_at	53765.1	18644.4		53765.1	18644.4
211538_s_at	7437.31	6764.37		7437.31	6764.37
211549_s_at	1.5406e+06	8564.37
211552_s_at	1224.24	1484.37		1224.24	1484.37
211576_s_at	29267.3	11804.4		29267.3	11804.4
211580_s_at	48763	18404.4		48763	18404.4
211603_s_at	10703.3	11264.4		10703.3	11264.4
211659_at	218441	2324.37		218441	2324.37
211704_s_at	39343.9	18764.4
211705_s_at	56908	15824.4		56908	15824.4
211715_s_at	2820.63	3884.37		2820.63	3884.37
211720_x_at	9557.14	9164.37		9557.14	9164.37
211759_x_at	2052.35	2144.37		2052.35	2144.37
211779_x_at	12.933	17.504		12.933	17.504
211831_s_at	118.902	108.105		118.902	108.105
211852_s_at	244.338	247.319		244.338	247.319
211867_s_at	40646.7	18104.4		40646.7	18104.4
211915_s_at	31101.4	19004.4		31101.4	19004.4
211924_s_at	7632.77	6704.37		7632.77	6704.37
211954_s_at	5715.73	5924.37		5715.73	5924.37
211962_s_at	10328.6	10784.4		10328.6	10784.4
211992_at	581.14	704.367		581.14	704.367
212041_at	8740.33	7784.37		8740.33	7784.37
212057_at	48255	17144.4
212077_at	43109.7	17804.4
212099_at	9530.28	5084.37		9530.28	5084.37
212105_s_at	1199.54	1304.37		1199.54	1304.37
212107_s_at	25430.1	3944.37		25430.1	3944.37
212121_at	43.8263	47.254		43.8263	47.254
212141_at	335952	1004.37		335952	1004.37
212150_at	1.40576e+06	11024.4
212240_s_at	74568.1	15464.4
212248_at	403.615	344.367		403.615	344.367
212266_s_at	42734.4	18044.4
212273_x_at	84.2611	77.64		84.2611	77.64
212300_at	54011.2	15404.4
212383_at	20.2602	24.373		20.2602	24.373
212441_at	59620.1	18044.4
212444_at	10000.6	10004.4		10000.6	10004.4
212462_at	15830.6	8984.37		15830.6	8984.37
212471_at	1.95376e+06	1664.37		1.95376e+06	1664.37
212531_at	4022.37	108.105		4022.37	108.105
212553_at	2.62103e+07	12524.4
212556_at	45505.9	18764.4
212562_s_at	75939.9	14744.4		75939.9	14744.4
212583_at	9175.27	8024.37		9175.27	8024.37
212625_at	8520.02	8144.37		8520.02	8144.37
212665_at	3555.46	2144.37		3555.46	2144.37
212710_at	132.562	150.526		132.562	150.526
212721_at	32189.7	18044.4
212737_at	63899	884.367		63899	884.367
212767_at	240409	3464.37		240409	3464.37
212803_at	8465.8	8804.37		8465.8	8804.37
212814_at	3633.12	3464.37		3633.12	3464.37
212838_at	10075.9	10124.4		10075.9	10124.4
212862_at	76411.1	2864.37		76411.1	2864.37
212867_at	2.87885e+06	11804.4
212928_at	9453.57	8204.37		9453.57	8204.37
212959_s_at	262950	1484.37		262950	1484.37
212967_x_at	10549.3	11084.4		10549.3	11084.4
212973_at	1.65868e+07	10364.4		1.65868e+07	10364.4
213005_s_at	30.507	28.76		30.507	28.76
213032_at	119521	14924.4
213076_at	10861.4	11144.4		10861.4	11144.4
213137_s_at	90.3319	55.76		90.3319	55.76
213151_s_at	39155	7904.37		39155	7904.37
213156_at	1.76076e+08	8804.37
213166_x_at	46.6917	55.76		46.6917	55.76
213233_s_at	4553.09	4724.37		4553.09	4724.37
213297_at	43085.8	19004.4		43085.8	19004.4
213307_at	19106	11384.4		19106	11384.4
213316_at	346413	9644.37		346413	9644.37
213338_at	126.947	150.526		126.947	150.526
213376_at	126332	14864.4
213402_at	38849	19004.4		38849	19004.4
213414_s_at	10299.2	1964.37		10299.2	1964.37
213418_at	15501.6	5444.37		15501.6	5444.37
213421_x_at	10708.3	10904.4		10708.3	10904.4
213446_s_at	38815	15824.4
213462_at	7018.22	3944.37		7018.22	3944.37
213475_s_at	233.532	247.319		233.532	247.319
213488_at	834.781	464.367		834.781	464.367
213501_at	8798.55	5084.37		8798.55	5084.37
213503_x_at	40891.7	17324.4
213506_at	1734.04	1964.37		1734.04	1964.37
213531_s_at	7586.22	7064.37		7586.22	7064.37
213552_at	11494.7	11684.4		11494.7	11684.4
213611_at	15.1728	17.504		15.1728	17.504
213624_at	188.024	177.621		188.024	177.621
213664_at	2240.68	1904.37		2240.68	1904.37
213667_at	34506.1	18284.4		34506.1	18284.4
213669_at	47.1708	47.254		47.1708	47.254
213694_at	30960.4	17924.4		30960.4	17924.4
213706_at	43402.8	19724.4		43402.8	19724.4
213708_s_at	3.34267e+07	12944.4
213710_s_at	1.32442e+06	14204.4		1.32442e+06	14204.4
213725_x_at	1230.62	1244.37		1230.62	1244.37
213783_at	29021.9	18644.4		29021.9	18644.4
213785_at	31469.6	19004.4		31469.6	19004.4
213800_at	55107.5	14324.4
213830_at	228.359	247.319		228.359	247.319
213846_at	2826.76	1604.37		2826.76	1604.37
213889_at	1.34747e+07	12284.4
214007_s_at	451.619	524.367		451.619	524.367
214014_at	166363	13544.4		166363	13544.4
214033_at	9002.88	7364.37		9002.88	7364.37
214070_s_at	50.1028	65.796		50.1028	65.796
214122_at	39727.2	16124.4		39727.2	16124.4
214152_at	1.48546e+06	12464.4
214177_s_at	70625.4	16244.4
214196_s_at	3.30485e+06	247.319
214197_s_at	55.8248	77.64		55.8248	77.64
214220_s_at	4.1492e+07	9764.37
214252_s_at	1.68651e+07	11924.4
214267_s_at	322280	12044.4		322280	12044.4
214270_s_at	37555.3	17684.4		37555.3	17684.4
214296_x_at	10482.5	11024.4		10482.5	11024.4
214320_x_at	9532.38	9164.37		9532.38	9164.37
214346_at	58.3991	55.76		58.3991	55.76
214350_at	62668.4	15824.4		62668.4	15824.4
214357_at	80.7041	77.64		80.7041	77.64
214377_s_at	8101.37	8384.37		8101.37	8384.37
214403_x_at	10633.4	11564.4		10633.4	11564.4
214427_at	3538.19	3764.37		3538.19	3764.37
214456_x_at	13988.6	14564.4		13988.6	14564.4
214458_at	56723.8	18044.4		56723.8	18044.4
214534_at	126063	13544.4		126063	13544.4
214546_s_at	2966.25	2924.37		2966.25	2924.37
214576_at	61582.7	17024.4		61582.7	17024.4
214625_s_at	1.99942e+06	14204.4
214629_x_at	14526.2	10664.4		14526.2	10664.4
214685_at	57772.5	18764.4		57772.5	18764.4
214687_x_at	26115.4	11564.4		26115.4	11564.4
214703_s_at	58.4795	65.796		58.4795	65.796
214750_at	3594.16	404.367		3594.16	404.367
214789_x_at	29827	15164.4		29827	15164.4
214802_at	10615.9	10844.4		10615.9	10844.4
214804_at	342.866	291.836		342.866	291.836
214828_s_at	10771.9	10664.4		10771.9	10664.4
214840_at	44387.8	18764.4		44387.8	18764.4
214864_s_at	46.5544	55.76		46.5544	55.76
215026_x_at	35789.8	17024.4		35789.8	17024.4
215027_at	41175.9	17264.4		41175.9	17264.4
215050_x_at	5928.73	6704.37		5928.73	6704.37
215053_at	321.172	344.367		321.172	344.367
215089_s_at	40.5593	40.046		40.5593	40.046
215125_s_at	308.543	108.105		308.543	108.105
215138_s_at	30316.4	16424.4		30316.4	16424.4
215178_x_at	220.567	177.621		220.567	177.621
215204_at	3295.45	3224.37		3295.45	3224.37
215255_at	45912.7	16844.4		45912.7	16844.4
215276_at	10910.8	11264.4		10910.8	11264.4
215278_at	10651.3	11324.4		10651.3	11324.4
215294_s_at	702.722	47.254		702.722	47.254
215304_at	5499.32	6944.37		5499.32	6944.37
215333_x_at	6643.14	6584.37		6643.14	6584.37
215384_s_at	2.33124e+06	12404.4		2.33124e+06	12404.4
215387_x_at	10321.7	10604.4		10321.7	10604.4
215424_s_at	8143.4	7844.37		8143.4	7844.37
215431_at	-5229.46	28.76		-5229.46	28.76
215452_x_at	10759.3	11264.4		10759.3	11264.4
215462_at	199894	13664.4		199894	13664.4
215464_s_at	12821.4	7004.37		12821.4	7004.37
215479_at	74.2166	65.796		74.2166	65.796
215499_at	5877.43	5804.37		5877.43	5804.37
215500_at	350.106	344.367		350.106	344.367
215515_at	11142.3	11444.4		11142.3	11444.4
215526_at	83.4368	91.615		83.4368	91.615
215585_at	119969	15884.4		119969	15884.4
215614_at	69066.7	17804.4
215681_at	72641.9	14564.4		72641.9	14564.4
215685_s_at	6.55213e+08	11144.4
215700_x_at	30430.9	17324.4		30430.9	17324.4
215709_at	36339.3	17924.4		36339.3	17924.4
215719_x_at	3155.03	3044.37		3155.03	3044.37
215733_x_at	34582.3	17684.4		34582.3	17684.4
215760_s_at	29972.1	19424.4		29972.1	19424.4
215766_at	41.4629	40.046		41.4629	40.046
215773_x_at	10318.5	10544.4		10318.5	10544.4
215845_x_at	3813.23	3764.37		3813.23	3764.37
215847_at	49.3685	65.796		49.3685	65.796
215861_at	10377.6	10604.4		10377.6	10604.4
215869_at	39678.6	17804.4		39678.6	17804.4
215873_x_at	3.24005e+07	11624.4
215902_at	12092.6	12344.4		12092.6	12344.4
215960_at	627460	6104.37		627460	6104.37
215995_x_at	11509.6	10184.4		11509.6	10184.4
216032_s_at	7118.52	644.367		7118.52	644.367
216041_x_at	288.207	344.367		288.207	344.367
216046_at	35839	19544.4		35839	19544.4
216061_x_at	9933.69	10064.4		9933.69	10064.4
216106_at	6.46458e+07	13124.4		6.46458e+07	13124.4
216194_s_at	41.7278	40.046		41.7278	40.046
216242_x_at	46.8716	65.796		46.8716	65.796
216261_at	11532.3	12104.4		11532.3	12104.4
216272_x_at	1.74433e+08	11624.4
216300_x_at	32397.5	18284.4		32397.5	18284.4
216308_x_at	2051.04	209.592		2051.04	209.592
216318_at	80294.5	17804.4
216331_at	24660.2	12764.4		24660.2	12764.4
216345_at	31054.6	16244.4		31054.6	16244.4
216358_at	43007.1	16604.4		43007.1	16604.4
216419_at	12338.2	13484.4		12338.2	13484.4
216423_at	11219.1	11564.4		11219.1	11564.4
216430_x_at	3014.11	2804.37		3014.11	2804.37
216481_at	11902.8	12584.4		11902.8	12584.4
216487_at	407.782	464.367		407.782	464.367
216508_x_at	1.31597e+07	11804.4
216521_s_at	121.973	127.564		121.973	127.564
216569_at	13303.8	14084.4		13303.8	14084.4
216602_s_at	52660.8	16904.4
216650_at	41682.8	17804.4		41682.8	17804.4
216656_at	30285.1	18284.4		30285.1	18284.4
216678_at	78.5543	65.796		78.5543	65.796
216685_s_at	133.98	150.526		133.98	150.526
216747_at	46205.4	17144.4		46205.4	17144.4
216791_at	1.33728e+07	4964.37		1.33728e+07	4964.37
216800_at	161799	15704.4		161799	15704.4
216827_at	30404.1	17324.4		30404.1	17324.4
216849_at	44.2814	47.254		44.2814	47.254
216862_s_at	123.63	127.564		123.63	127.564
216894_x_at	14824.3	14864.4		14824.3	14864.4
216930_at	14010.6	13964.4		14010.6	13964.4
216970_at	9941.3	10004.4		9941.3	10004.4
216980_s_at	125.476	150.526		125.476	150.526
217030_at	3739.25	3884.37		3739.25	3884.37
217100_s_at	33499.7	16004.4		33499.7	16004.4
217117_x_at	12531.4	12524.4		12531.4	12524.4
217135_x_at	59171.3	15164.4		59171.3	15164.4
217168_s_at	3782.75	3764.37		3782.75	3764.37
217171_at	12301.3	12944.4		12301.3	12944.4
217207_s_at	3294.89	3104.37		3294.89	3104.37
217255_at	38680.4	17684.4		38680.4	17684.4
217261_at	43173.9	18764.4		43173.9	18764.4
217278_x_at	39456.8	17444.4		39456.8	17444.4
217299_s_at	3707.99	3944.37		3707.99	3944.37
217387_at	43044.8	19004.4
217413_s_at	12979.8	13904.4		12979.8	13904.4
217458_at	1715.84	1724.37		1715.84	1724.37
217471_at	42796.8	17804.4		42796.8	17804.4
217509_x_at	14142.8	14744.4		14142.8	14744.4
217559_at	28586.7	11924.4		28586.7	11924.4
217567_at	705244	6404.37		705244	6404.37
217625_x_at	37.3933	28.76		37.3933	28.76
217634_at	31335.5	18644.4		31335.5	18644.4
217635_s_at	44761.3	17144.4		44761.3	17144.4
217651_at	3315.34	3284.37		3315.34	3284.37
217711_at	213575	13724.4		213575	13724.4
217736_s_at	5944.12	5324.37		5944.12	5324.37
217741_s_at	2378.87	2264.37		2378.87	2264.37
217743_s_at	9371.09	8444.37		9371.09	8444.37
217744_s_at	112209	884.367		112209	884.367
217783_s_at	3.26243e+06	1964.37
217788_s_at	43271.5	18764.4
217796_s_at	105.843	91.615		105.843	91.615
217798_at	36131.2	18764.4
217802_s_at	46264.5	18044.4
217808_s_at	3166.64	1904.37		3166.64	1904.37
217818_s_at	8.77837e+07	10964.4
217840_at	44.9408	47.254		44.9408	47.254
217846_at	48277.5	16604.4
217855_x_at	364.613	344.367		364.613	344.367
217861_s_at	116.541	108.105		116.541	108.105
217871_s_at	2143.89	1004.37		2143.89	1004.37
217872_at	11003.4	11864.4		11003.4	11864.4
217958_at	55125.6	2264.37		55125.6	2264.37
217990_at	9762.01	764.367		9762.01	764.367
217996_at	21644.1	9944.37		21644.1	9944.37
217997_at	2.24508e+06	12164.4
217999_s_at	2.12501e+06	12584.4
218000_s_at	12274.9	8024.37		12274.9	8024.37
218017_s_at	10826.4	11624.4		10826.4	11624.4
218030_at	300639	15704.4		300639	15704.4
218035_s_at	1157.14	524.367		1157.14	524.367
218054_s_at	58134.9	18764.4		58134.9	18764.4
218083_at	20761.5	11324.4		20761.5	11324.4
218102_at	20558.2	3464.37		20558.2	3464.37
218121_at	14300.3	15164.4		14300.3	15164.4
218135_at	377.195	404.367		377.195	404.367
218145_at	122961	14564.4		122961	14564.4
218167_at	11288.1	12464.4		11288.1	12464.4
218199_s_at	1.62165e+07	10544.4		1.62165e+07	10544.4
218238_at	1326.14	1484.37		1326.14	1484.37
218255_s_at	39383	12464.4		39383	12464.4
218259_at	19859	291.836		19859	291.836
218277_s_at	2302.2	3224.37		2302.2	3224.37
218295_s_at	969.462	824.367		969.462	824.367
218316_at	11720.9	12584.4		11720.9	12584.4
218368_s_at	16156.8	6764.37		16156.8	6764.37
218397_at	34486.4	19184.4
218431_at	91845	7784.37
218450_at	244.092	209.592		244.092	209.592
218459_at	121.081	91.615		121.081	91.615
218551_at	37056.8	17564.4		37056.8	17564.4
218566_s_at	4.94504e+08	14504.4
218569_s_at	7896.62	7064.37		7896.62	7064.37
218589_at	1911.65	1784.37		1911.65	1784.37
218622_at	15088.2	4964.37		15088.2	4964.37
218630_at	115.022	91.615		115.022	91.615
218631_at	44.6075	47.254		44.6075	47.254
218637_at	10173.2	10364.4		10173.2	10364.4
218698_at	50626.1	11444.4		50626.1	11444.4
218709_s_at	10746.1	11204.4		10746.1	11204.4
218757_s_at	11002.9	2924.37		11002.9	2924.37
218768_at	91.5171	91.615		91.5171	91.615
218775_s_at	1823.52	1784.37		1823.52	1784.37
218800_at	9993.79	9884.37		9993.79	9884.37
218807_at	169750	7364.37
218840_s_at	113.15	91.615		113.15	91.615
218842_at	28332.7	15164.4		28332.7	15164.4
218863_s_at	11471.7	11804.4		11471.7	11804.4
218871_x_at	4365.12	4544.37		4365.12	4544.37
218882_s_at	1564.49	1484.37		1564.49	1484.37
218916_at	65035.5	17684.4
218973_at	2250.5	2204.37		2250.5	2204.37
218984_at	673.198	944.367		673.198	944.367
218988_at	7428.98	4904.37		7428.98	4904.37
219016_at	1033.45	944.367		1033.45	944.367
219028_at	903011	12884.4		903011	12884.4
219060_at	9880.45	9764.37		9880.45	9764.37
219073_s_at	4932.67	524.367		4932.67	524.367
219099_at	5629.23	5924.37		5629.23	5924.37
219110_at	9972.1	7664.37		9972.1	7664.37
219133_at	66.3263	65.796		66.3263	65.796
219203_at	92.4822	91.615		92.4822	91.615
219220_x_at	57.5225	55.76		57.5225	55.76
219238_at	4253.01	5024.37		4253.01	5024.37
219250_s_at	240.473	291.836		240.473	291.836
219267_at	70412.4	17684.4
219286_s_at	31124.1	17684.4		31124.1	17684.4
219288_at	3025.58	2924.37		3025.58	2924.37
219308_s_at	8820.61	8384.37		8820.61	8384.37
219319_at	39854.8	17144.4		39854.8	17144.4
219331_s_at	10817.1	8984.37		10817.1	8984.37
219365_s_at	4.26581e+06	13724.4
219369_s_at	110525	15404.4		110525	15404.4
219385_at	11360.1	11804.4		11360.1	11804.4
219395_at	94344.3	16004.4		94344.3	16004.4
219406_at	34772.8	17324.4
219417_s_at	13736.2	13964.4		13736.2	13964.4
219435_at	2130.86	1844.37		2130.86	1844.37
219445_at	4.40149e+06	9464.37		4.40149e+06	9464.37
219499_at	84.2567	77.64		84.2567	77.64
219589_s_at	29693.9	18164.4		29693.9	18164.4
219600_s_at	6023.24	5804.37		6023.24	5804.37
219612_s_at	439.023	524.367		439.023	524.367
219640_at	43270.5	18464.4		43270.5	18464.4
219675_s_at	29916.7	12284.4		29916.7	12284.4
219690_at	32394.4	17684.4		32394.4	17684.4
219747_at	4432.41	3704.37		4432.41	3704.37
219755_at	9586.44	8804.37		9586.44	8804.37
219769_at	2999.11	2744.37		2999.11	2744.37
219785_s_at	1209.93	1304.37		1209.93	1304.37
219818_s_at	2.47572e+06	12524.4
219838_at	38571.2	17684.4
219839_x_at	64353.8	19004.4
219867_at	89956.5	4124.37		89956.5	4124.37
219893_at	35243.8	16604.4		35243.8	16604.4
219899_x_at	76048.3	15824.4		76048.3	15824.4
220015_at	97977.6	15044.4		97977.6	15044.4
220067_at	276.458	209.592		276.458	209.592
220068_at	725636	10964.4		725636	10964.4
220069_at	835925	13244.4		835925	13244.4
220077_at	39155.8	18044.4		39155.8	18044.4
220078_at	1299.33	1544.37		1299.33	1544.37
220114_s_at	164.721	209.592		164.721	209.592
220141_at	41.0661	40.046		41.0661	40.046
220159_at	40792.9	16904.4		40792.9	16904.4
220161_s_at	5331.31	404.367		5331.31	404.367
220193_at	47498.3	16724.4		47498.3	16724.4
220223_at	4845.95	5564.37		4845.95	5564.37
220251_at	114515	16244.4
220264_s_at	5534.75	4244.37		5534.75	4244.37
220291_at	555323	12764.4		555323	12764.4
220319_s_at	3381.75	4124.37		3381.75	4124.37
220366_at	556590	13004.4
220421_at	41.5291	47.254		41.5291	47.254
220437_at	40727	18044.4		40727	18044.4
220452_x_at	6264.64	5804.37		6264.64	5804.37
220455_at	44156.7	19184.4		44156.7	19184.4
220465_at	85768.5	11924.4		85768.5	11924.4
220470_at	13182.4	13964.4		13182.4	13964.4
220492_s_at	664.449	584.367		664.449	584.367
220526_s_at	10372.2	10784.4		10372.2	10784.4
220536_at	12102.2	12524.4		12102.2	12524.4
220540_at	36325.6	16724.4		36325.6	16724.4
220588_at	37035.7	17984.4		37035.7	17984.4
220601_at	12443.4	12764.4		12443.4	12764.4
220607_x_at	76.8857	65.796		76.8857	65.796
220618_s_at	6.1561e+07	11144.4
220626_at	44437.4	17684.4		44437.4	17684.4
220648_at	30949.7	19004.4		30949.7	19004.4
220659_s_at	61506.3	18644.4
220667_at	3.05746e+06	8444.37		3.05746e+06	8444.37
220735_s_at	123.061	108.105		123.061	108.105
220813_at	45474.7	16604.4		45474.7	16604.4
220826_at	1.00799e+07	10004.4		1.00799e+07	10004.4
220829_s_at	654.434	464.367		654.434	464.367
220830_at	49521.7	17564.4		49521.7	17564.4
220858_at	28906.2	17924.4		28906.2	17924.4
220881_at	76.2984	65.796		76.2984	65.796
220895_at	1.3999e+07	6104.37		1.3999e+07	6104.37
220905_at	5557.93	5924.37		5557.93	5924.37
221141_x_at	36119.2	16244.4		36119.2	16244.4
221148_at	26474.7	12164.4		26474.7	12164.4
221159_at	48514.4	18464.4		48514.4	18464.4
221178_at	6417.11	6884.37		6417.11	6884.37
221273_s_at	29887.7	17924.4		29887.7	17924.4
221281_at	10900	9884.37		10900	9884.37
221303_at	77.3245	77.64		77.3245	77.64
221313_at	55.7706	55.76		55.7706	55.76
221333_at	49706.3	16964.4		49706.3	16964.4
221351_at	3.14232e+09	11444.4
221382_at	6.46689e+07	14864.4		6.46689e+07	14864.4
221410_x_at	11904.8	10664.4		11904.8	10664.4
221447_s_at	43017.9	18164.4		43017.9	18164.4
221458_at	2562.98	1784.37		2562.98	1784.37
221504_s_at	12270.9	524.367		12270.9	524.367
221532_s_at	9470.83	8444.37		9470.83	8444.37
221537_at	36052	18764.4		36052	18764.4
221549_at	54530.4	16544.4		54530.4	16544.4
221560_at	12437.1	13604.4		12437.1	13604.4
221577_x_at	45588.4	11684.4		45588.4	11684.4
221578_at	10427.4	10544.4		10427.4	10544.4
221599_at	42808.2	15584.4
221649_s_at	11433.4	12104.4		11433.4	12104.4
221651_x_at	54.8879	65.796		54.8879	65.796
221714_s_at	57.5849	55.76		57.5849	55.76
221740_x_at	69841.2	14864.4
221752_at	20885.7	11384.4		20885.7	11384.4
221754_s_at	10478.2	10544.4		10478.2	10544.4
221758_at	27170	11504.4		27170	11504.4
221843_s_at	30230.9	19004.4		30230.9	19004.4
221856_s_at	38934.4	17144.4		38934.4	17144.4
221876_at	3882.34	4784.37		3882.34	4784.37
221883_at	4.78518	2.036		4.78518	2.036
221941_at	47.814	55.76		47.814	55.76
221982_x_at	44402.1	17564.4		44402.1	17564.4
221990_at	59431.7	18044.4		59431.7	18044.4
222017_x_at	40655.5	17564.4		40655.5	17564.4
222032_s_at	11530.9	8084.37		11530.9	8084.37
222059_at	34756	16064.4		34756	16064.4
222067_x_at	936.516	1004.37		936.516	1004.37
222087_at	6263.99	5564.37		6263.99	5564.37
222167_at	5.41689e+06	2684.37		5.41689e+06	2684.37
222192_s_at	9758.37	9464.37		9758.37	9464.37
222323_at	49484.1	14744.4		49484.1	14744.4
222372_at	5755.79	5144.37		5755.79	5144.37
31637_s_at	43.2677	55.76		43.2677	55.76
31807_at	97.304	91.615		97.304	91.615
34858_at	2.15365	1.725		2.15365	1.725
36711_at	45054.7	10784.4		45054.7	10784.4
37022_at	6.39402e+07	11684.4
37028_at	20147.5	8804.37		20147.5	8804.37
38691_s_at	8291.87	8444.37		8291.87	8444.37
38707_r_at	3.93888e+07	2204.37		3.93888e+07	2204.37
38964_r_at	75770.1	1364.37		75770.1	1364.37
39249_at	12806.1	5684.37		12806.1	5684.37
39402_at	72308.2	16004.4		72308.2	16004.4
39549_at	6260.64	6884.37		6260.64	6884.37
396_f_at	59.31	65.796		59.31	65.796
41387_r_at	1412.98	1364.37		1412.98	1364.37
41644_at	843.786	944.367		843.786	944.367
44120_at	332936	13364.4
49111_at	3.87241	3.344		3.87241	3.344
50277_at	2571.12	2504.37		2571.12	2504.37
52164_at	85182.2	4124.37		85182.2	4124.37
52731_at	136.677	150.526		136.677	150.526
54037_at	55.8427	55.76		55.8427	55.76
55692_at	1.26352e+07	10664.4
59437_at	12613	3104.37		12613	3104.37
64474_g_at	46615.3	15824.4
65630_at	12435.8	10784.4		12435.8	10784.4
71933_at	120.305	108.105		120.305	108.105
91682_at	2262.38	1904.37		2262.38	1904.37

## Sheet: Imatinib 4 hour data
Dose	Identified by XLfit with P<0.05	Xlfit_A	Xlfit_B	Xlfit_C	Xlfit_D	Identified by SDRS with P<0.05	SDRS P value	SDRS_A	SDRS_B	SDRS_C	SDRS_D	Imatinib_0	Imatinib_0.17	Imatinib_0.5	Imatinib_1.5	Imatinib_4.5	Imatinib_13.7	Imatinib_41.2	Imatinib_123.5	Imatinib_370.4	Imatinib_1111	Imatinib_3333	Imatinib_10000	Imatinib_30000
1007_s_at						Yes, but >10% FDR	0.03359	1525.3	1881.92	2804.37	0.3	1863.62	1942.91	1770.57	1916.16	1819.09	1776.72	1805.27	1759.56	1819.09	1699.62	1717.39	1776.72	1513.84
1598_g_at	Yes	210.088	247.87	1317.02	-1.96887	Yes, but >10% FDR	0.0045729	210.152	248.188	1304.37	-2.1	225.12	223.32	202.11	217.82	209.96	209.96	195.5	196.04	213.49	227.54	239.69	249.69	247.28
1729_at	Yes	262.47	290.309	-20272.8	1	No		279.659	325.921	0.33	6.3	296.45	362.29	280.14	303.17	268.91	286.62	288.61	274.18	292.64	264.48	280.92	278.98	262.47
1773_at	Yes	151.59	198.461	3373.91	12.4254	Yes, but >10% FDR	0.0037512	153.37	198.616	3344.37	6.3	195.57	188.84	198.78	191.87	210.69	214.08	208.23	174.97	202.11	199.47	176.8	150.75	152.43
1861_at	Yes	127.83	151.62	793.866	1.74573	Yes, but >10% FDR	0.0097897	127.589	151.641	824.367	1.8	149.5	155.96	152.22	152.01	135.86	152.85	156.61	159.12	144.21	135.96	131.14	136.14	118.93
200007_at						Yes, but >10% FDR	0.037592	5991.67	6479.69	944.367	6.3	6466.54	6139.9	6803.21	6431.77	6418.41	6308.14	6883.85	6485.49	6640.15	6105.95	6063.77	5992.74	5922.54
200008_s_at						Yes, but >10% FDR	0.03342	4680.13	5283.5	584.367	1.2	5047.04	5039.27	5796.64	5293.48	5213.37	5198.93	5415.95	5275.16	4959.57	4901.47	4894.68	4442.02	4770.75
200025_s_at						Yes, but >10% FDR	0.02466	14716.2	16584	19184.4	6.3	16382.7	16463.7	16589.7	15683.9	17115.3	16113.7	16868	16763.1	16798	16566.7	16293.4	17020.7	14694.6
200027_at	Yes	5123.29	5397.44	36.1337	3.37198	Yes, but >10% FDR	0.009756	5119.93	5395.43	40.046	6.3	5334.81	5506.81	5442.3	5271.51	5446.07	5371.09	5235.09	5088.41	5256.91	5099	5216.98	4952.7	5127.36
200031_s_at						Yes, but >10% FDR	0.045542	22166	22844	209.592	6.3	22814.5	22195.8	23299.3	22930.8	22756.6	22740.9	22740.9	22978.5	22042.5	22057.8	21981.5	22599.5	22119
200035_at						Yes, but >10% FDR	0.030563	457.394	548.292	77.64	6.3	547.44	512	509.52	632.1	525.3	595.52	569.68	451.94	456.67	431.44	475.73	516.28	419.06
200046_at						Yes, but >10% FDR	0.032805	3702.88	4256.3	5444.37	6.3	4337.89	4323.55	4491.56	4059.26	4264.02	4073.35	4448.18	4110.22	4519.66	3945.52	4281.79	3628.1	3724.94
200047_s_at	Yes	1542.44	2075.91	9798.81	17.1231	Yes, but >10% FDR	0.010579	1518	2077.41	9644.37	6.3	2078.99	2137.93	2245.78	1845.76	2117.29	1952.36	1982.36	2056.54	2245.78	2060.82	2111.42	1763.22	1542.44
200048_s_at						Yes, but >10% FDR	0.043462	3310.05	3596.62	77.64	6.3	3498.85	3628.1	3805.84	3487.55	3413.41	3694.08	3753.45	3176.01	3468.27	3304	3352.45	3385.14	3229.29
200064_at	Yes	10981.1	11559.9	41.0268	16.1869	Yes, but >10% FDR	0.0096017	10948.3	11559.9	40.046	5.4	11569.2	11561.2	11601.3	11529.2	11481.3	11617.4	11260.6	10930	10884.6	11128.7	11457.5	10862	10623.7
200065_s_at	Yes	7026.3	7624.21	257.546	0.808589	Yes, but >10% FDR	0.0022013	7021.58	7604.56	291.836	0.9	7379.06	7680.58	7798.6	7717.94	7449.87	7580.09	7664.63	7281.4	7271.31	7211.08	7166.24	6975.11	7043.13
200085_s_at	Yes	7393.85	8502.59	1199.73	0.329124	Yes, but >10% FDR	0.0021795	7527.85	8519.79	464.367	0.3	8363.49	8635.12	8545.8	8266.15	8364.13	8277.62	8312.12	7995.65	7847.41	8124.14	7940.42	7880.11	7538.18
200090_at						Yes, but >10% FDR	0.022809	4775.56	5032.9	464.367	6.3	5017.59	4935.57	4952.7	4980.24	5084.89	5188.13	5120.26	4874.37	4987.15	4741.08	4803.93	4817.27	4783.99
200093_s_at						Yes, but >10% FDR	0.048746	6896.29	7419.08	644.367	6.3	7422.95	7522.52	7606.41	6855.28	7439.55	7470.56	7377.93	7403.54	7638.11	6690.97	6926.93	7106.88	6936.54
200609_s_at	Yes	1111.06	3595.12	31993	14.7068	Yes, but >10% FDR	0.0058726	2937.68	3592.54	18044.4	6.3	3604.15	3422.89	3608.04	3653.34	3600.55	3678.75	3837.63	3635.66	3444.31	3473.08	3509.38	3673.65	2900.33
200612_s_at	Yes	1611.31	1917.83	43.9379	12.452	Yes, but >10% FDR	0.0077183	1611.32	1917.83	47.254	6	1898.97	1930.82	1859.89	2046.58	1861.18	1909.53	1822.88	1605.71	1719.77	1476.54	1673.9	1760.78	1431.19
200616_s_at						Yes, but >10% FDR	0.039962	1906.75	2312.57	247.319	6.3	2259.31	2411.98	2137.93	2400.3	2070.84	2512.66	2280.29	2432.12	1896.34	2151.31	1676.22	2072.28	1586.9
200617_at						Yes, but >10% FDR	0.022433	1418.85	1736.88	14864.4	6.3	1759.7	1653.15	1574.85	1816.57	1683.21	1776.72	1734.13	1712.63	1757.12	1768.12	1795.29	1712.63	1419.34
200620_at	Yes	4388.74	5219.81	215.196	0.895199	Yes, but >10% FDR	0.0061935	4373.58	5238.52	209.592	0.9	4988.69	5001	5560.5	5249.63	5348.8	4949.27	5282.48	4813.93	4608.24	4585.93	4757.54	4138.81	4417.46
200624_s_at						Yes, but >10% FDR	0.0068855	3180.56	3864.39	12584.4	6.3	3756.05	3737.87	4156.06	3792.67	3834.97	4020.06	3920.98	3883.12	3888.51	3691.52	3784.8	3737.87	3130.12
200642_at						Yes, and meet 10%FDR	0.00095697	8761.05	10131.2	6704.37	1.2	10246.8	9919.14	10261.8	10022.8	10057.6	10333.2	10434	9802.95	10085.5	9802.95	9823.35	9377.58	8749.59
200647_x_at						Yes, but >10% FDR	0.020037	4322.82	4818.2	77.64	6.3	4827.67	4857.51	5025.32	4797.28	4393.03	5032.29	4830.64	4320.55	4414.39	4529.07	4314.57	4426.65	4067.71
200652_at						Yes, but >10% FDR	0.018791	3923.03	4220.99	77.64	6.3	4121.95	4252.22	4350.6	4176.27	4096	4284.76	4296.66	3907.42	4050.82	3850.95	4138.81	3790.05	3842.95
200655_s_at						Yes, but >10% FDR	0.0022116	6256.76	8240.49	11444.4	6.3	8284.63	8283.36	9064.43	8051.27	8317.88	8169.32	8369.93	7798.6	8445.69	7847.41	8266.15	7654.01	6144.16
200660_at						Yes, but >10% FDR	0.017322	10652.1	12100	16604.4	-6	10591.9	10831.9	11167.4	11028.9	11044.2	10550.3	10390.7	10226.3	10247.6	10734.7	10521.1	10653.2	12161.2
200667_at						Yes, but >10% FDR	0.026755	1744.36	1915.65	65.796	6.3	1878.75	1928.15	1940.21	1922.81	1861.18	1893.71	1957.78	1686.71	1805.27	1653.15	1729.33	1730.53	1902.92
200673_at	Yes	-125263	5757.35	7.5134e+06	0.872612	Yes, but >10% FDR	0.0015494	4753.48	5749.37	10904.4	6.3	5668.17	5812.73	6030.24	5525.92	5926.65	5618.62	5784.59	5816.76	5669.48	5548.95	5657.7	5386.01	4701.81
200678_x_at						Yes, but >10% FDR	0.0037395	956.863	1161.73	91.615	2.4	1160.79	1256.33	1143.31	1164.1	1033.27	1236.46	1125.23	1036.14	949.48	934.47	925.44	1009.9	983.65
200680_x_at						Yes, but >10% FDR	0.022515	7836.8	9155.76	10244.4	6.3	9184.59	8896.36	9561.36	9008.06	8896.36	9203.71	8933.44	9045.6	9926.02	8859.44	9416.66	8545.8	7787.8
200683_s_at						Yes, but >10% FDR	0.016627	1074.12	1359.84	7364.37	6.3	1367.72	1390.13	1519.1	1321.54	1320.62	1339.06	1420.32	1353.99	1299.73	1221.98	1373.84	1109.74	1091.43
200689_x_at	Yes	15991.3	18000.1	9090.51	18.6278	Yes, but >10% FDR	0.008522	15997.4	17952.7	7664.37	6.3	17962.1	18318.3	18217	17682.1	18041.1	17438.6	18318.3	17414.5	18872.5	17342.2	18394.7	16282.1	15991.3
200701_at						Yes, and meet 10%FDR	0.00048841	1945.89	2551.38	3044.37	0.6	2541.86	2516.15	2570.8	2613.92	2406.97	2553.04	2588.68	2457.54	2375.47	2296.15	2307.32	2233.36	1932.16
200706_s_at						Yes, but >10% FDR	0.022306	2183.94	2520.05	7664.37	6.3	2505.7	2455.84	2563.68	2654.09	2438.87	2500.5	2540.68	2339.53	2440.57	2590.47	2619.36	2233.36	2194.99
200711_s_at						Yes, but >10% FDR	0.024019	2895.24	3563.67	2684.37	0.6	3513.71	3359.43	3864.32	3595.56	3638.18	3389.84	3563.3	3458.67	3499.66	3093.45	3304	3233.77	2928.61
200712_s_at						Yes, but >10% FDR	0.031633	865.092	999.795	1244.37	6.3	958.37	985.01	1086.9	973.47	954.76	1108.97	968.09	970.78	1006.41	958.74	815.76	870.08	892.06
200715_x_at						Yes, but >10% FDR	0.033045	13427.3	15100.9	11924.4	6.3	15501.4	14972.2	15149.7	15297.4	14512.4	15478.7	14982.6	14735.4	15339.9	14432.2	15804	14694.6	13372.7
200719_at	Yes	-5585.24	532.023	48717.5	8.86481	Yes, but >10% FDR	0.016798	452.72	533.943	16604.4	6.3	523.93	536.71	527.49	551.03	552.56	501.81	542.7	518.07	548.37	540.82	507.41	533.37	450.07
200720_s_at						Yes, but >10% FDR	0.019373	713.737	914.387	11564.4	6.3	899.93	907.65	856.32	961.4	970.11	919.69	905.14	913.97	816.33	929.94	939.66	856.91	715.1
200722_s_at	Yes	1294.08	1993.19	16920.4	0.452886	Yes, but >10% FDR	0.010795	1571.04	1996.94	1724.37	0.6	1815.45	1970.03	2046.58	2038.09	2095.39	2062.24	1902.92	1914.83	1763.22	1820.35	1819.09	1734.13	1562.89
200736_s_at						Yes, but >10% FDR	0.015228	1958.51	2571.8	8564.37	1.8	2529.36	2530.14	2880.29	2433.81	2585.09	2601.27	2698.61	2455.84	2676.26	2354.17	2495.3	2248.89	1956.42
200737_at						Yes, but >10% FDR	0.01114	4099.36	5784.86	3344.37	0.6	5886.61	5918.43	5804.68	6225.61	5056.77	6148.42	5657.7	5127.36	5359.94	5518.27	5070.81	4741.08	4098.84
200739_s_at						Yes, but >10% FDR	0.03803	467.984	568.231	65.796	6.3	559.72	580.44	651.22	527.86	577.23	526.39	573.64	430.84	469.83	507.76	546.85	438.06	435.04
200744_s_at						Yes, but >10% FDR	0.0071503	1321.38	1644.11	13304.4	6.3	1658.5	1765.67	1594.62	1661.19	1521.21	1705.52	1658.89	1662.34	1599.05	1683.21	1624.75	1597.94	1306.06
200748_s_at	Yes	17222.9	18138.8	106.981	14.0648	Yes, but >10% FDR	0.0026393	17240.8	18138.6	91.615	6.3	18369.2	18141.4	17953.8	18343.7	18217	17805.1	18141.4	17330.2	16879.7	17008.9	17596.5	17608.7	17020.7
200752_s_at						Yes, but >10% FDR	0.03501	547.383	700.292	247.319	0.6	674.55	733.68	658.03	750.65	617.37	694.58	690.26	583.26	618.23	596.34	648.07	512.71	542.7
200756_x_at						Yes, but >10% FDR	0.0085256	791.257	1002.65	2444.37	3.6	950	1026.84	1021.16	1072.68	974.15	938.36	1085.39	990.49	899.51	993.24	842.77	767.49	820.3
200758_s_at						Yes, but >10% FDR	0.031387	971.551	1175.37	8564.37	2.1	1138.48	1144.9	1226.22	1183.63	1137.78	1247.65	1114.36	1183.63	1108.2	1260.69	1120.56	1068.97	966.75
200760_s_at						Yes, but >10% FDR	0.030227	2813.47	3587.99	8984.37	3.3	3560.01	3598.05	4096	3432.4	3563.3	3352.45	3829.66	3489.97	3787.42	3514.25	3568.25	3127.95	2838.67
200765_x_at						Yes, but >10% FDR	0.024909	3432.02	3735.86	47.254	5.7	3714.91	3696.64	3869.68	3832.31	3615.55	3648.28	3628.1	3315.48	3563.3	3347.81	3653.34	3427.64	3322.38
200780_x_at						Yes, and meet 10%FDR	0.00059518	7573.27	8522.43	14.834	0.9	8379.61	8713.28	8393.17	8398.99	8001.2	8231.84	8023.41	7439.55	7601.14	7787.8	7449.87	7669.94	7491.3
200783_s_at						Yes, but >10% FDR	0.041446	256.071	322.397	11624.4	6.3	314.01	332.22	324.26	288.01	325.84	330.16	342.51	316.27	309.54	314.3	353.85	303.8	255.65
200785_s_at	Yes	76.7137	106.89	10289.6	-11.2931	Yes, but >10% FDR	0.0057098	76.848	106.025	10484.4	-6	73.93	78.85	70.28	82.25	86.22	76.96	72.86	81.18	66.17	79.78	75.37	89.39	106.89
200788_s_at						Yes, but >10% FDR	0.031196	615.963	789.509	6584.37	-1.2	611.22	578.03	607.19	564.18	703.79	593.87	674.65	598	586.91	633.41	700.87	690.26	785.79
200789_at	Yes	1713.52	2040.41	1068.25	0.425682	Yes, but >10% FDR	0.014641	1770.28	2043.15	344.367	0.6	1979.61	2059.39	2109.96	2065.11	1863.76	2092.48	1929.48	1952.36	1905.56	1859.89	1870.23	1815.31	1758.34
200793_s_at						Yes, but >10% FDR	0.0077246	721.648	1041.8	7784.37	0.9	1020.61	1138.56	1031.84	1027.56	1041.18	1046.97	1039.01	1003.62	962.74	1041.9	881.61	958.74	720.07
200799_at	Yes	-61422.4	3455.05	4.30877e+06	0.824534	Yes, but >10% FDR	0.019786	2434.63	3461.84	9584.37	1.8	3522.11	3125.78	3531.34	3084.88	3560.84	3926.42	3480.31	3465.87	3294.86	3492.39	3202.54	3046.63	2390.34
200802_at						Yes, but >10% FDR	0.034811	1596.28	1823.09	40.046	5.4	1816.71	1743.78	1779.18	2036.67	1711.45	1830.47	1724.54	1530.73	1731.73	1611.29	1628.13	1521.21	1574.85
200803_s_at						Yes, but >10% FDR	0.00217	4887.04	6078.31	10784.4	6.3	5965.11	6374.07	6378.49	6387.34	6080.61	5906.14	5988.59	6072.18	5967.87	5849.1	5922.54	5626.41	4827.3
200804_at	Yes	7186.53	7710.65	1018.48	19.7552	Yes, but >10% FDR	0.0081909	7148	7722.99	884.367	6.3	7838.95	7696.57	7675.26	7934.92	7398.41	7755.48	7712.59	7595.87	7787.8	7266.27	7043.13	7429.25	7087.2
200808_s_at	Yes	109.719	622.911	38658.5	-10.0541	Yes, but >10% FDR	0.018942	108.526	146.574	18764.4	-6	112.86	107.93	106.89	116.73	104.76	121.26	108.23	100.29	124.59	102.68	106.01	104.4	146.83
200809_x_at						Yes, but >10% FDR	0.01356	19217.1	20335.8	77.64	6.3	20144.7	20213.1	20666.4	20241.1	19714.9	20623.5	20680.7	19096.2	19538.1	19282.4	19865.8	19122.7	18548.3
200810_s_at						Yes, but >10% FDR	0.038185	2559.71	3428.07	16604.4	6.3	3498.58	3880.43	3663.48	3704.34	3156.26	3347.81	3511.81	3411.05	3389.84	3182.62	3204.76	3420.52	2521.38
200815_s_at	Yes	797.812	1010.35	63.1599	0.282236	Yes, but >10% FDR	0.012552	799.766	1005.41	65.796	0.3	1000.38	1018.34	957.41	960.07	903.26	910.81	935.76	928.01	810.12	856.91	935.12	823.14	803.41
200817_x_at						Yes, but >10% FDR	0.018007	14877.4	16182.3	24.373	1.2	15688.8	16452.3	16259.5	16203.3	16124.9	15457.3	15662.2	14807.1	14462.2	15160.2	15339.9	14037.5	15478.7
200820_at						Yes, but >10% FDR	0.028257	4089.24	4440.27	33.937	2.7	4415.07	4510.28	4429.72	4414.39	4479.12	4393.03	4243.39	4070.53	4025.63	3989.52	4320.55	3885.81	4374.8
200821_at	Yes	300.695	494.908	16987.7	1.56353	Yes, but >10% FDR	0.0063707	362.467	493.476	10664.4	3	482.11	488.43	490.8	477.38	552.18	464.97	519.51	464.33	502.86	509.88	472.77	437.46	357.05
200824_at						Yes, but >10% FDR	0.0064923	3216.61	3420.58	2.834	6.3	3328.27	3425.27	3531.34	3444.31	3215.88	3231.53	3202.54	3187.04	3093.45	3204.76	3304	3274.37	3198.1
200827_at						Yes, but >10% FDR	0.019084	516.162	591.71	91.615	6	595.1	576.83	577.63	601.74	548.37	666.29	604.67	529.32	491.14	491.82	547.61	535.97	501.12
200829_x_at						Yes, but >10% FDR	0.017509	2194.71	2557.61	7904.37	5.1	2618.56	2517.89	2606.68	2398.64	2491.85	2606.68	2715.5	2507.44	2597.67	2411.98	2553.04	2278.71	2182.85
200830_at						Yes, but >10% FDR	0.03206	1608.23	1811.96	209.592	2.4	1825.26	1806.52	1737.74	1868.93	1630.39	1970.03	1811.54	1752.26	1653.15	1603.49	1613.52	1641.73	1571.58
200831_s_at						Yes, but >10% FDR	0.039061	1650.4	1901.96	127.564	6.3	1803.74	1859.89	1918.82	2137.93	1762	1972.76	1971.39	1786.6	1678.55	1791.56	1675.06	1553.17	1633.78
200839_s_at	Yes	3321.14	3708.03	764.1	1.47525	Yes, but >10% FDR	0.011071	3303.57	3684.9	1304.37	6.3	3748.53	3635.66	3681.3	3660.94	3688.96	3808.48	3816.41	3593.07	3570.72	3580.64	3136.63	3531.34	3265.3
200840_at						Yes, but >10% FDR	0.031899	5591.9	7027.9	11384.4	6	7047.47	7097.03	7393.29	6365.24	6544.19	6836.3	7077.38	7062.68	7616.96	7306.68	7097.03	6580.58	5610.84
200842_s_at						Yes, but >10% FDR	0.029487	1536.65	2070.91	17144.4	6.3	2073.07	2161.77	2026.82	2048	1874.12	2184.37	2096.84	2250.45	2099.75	2059.39	1827.94	2062.24	1545.65
200848_at	Yes	-36100.5	1117.95	43444.8	12.3043	Yes, but >10% FDR	0.0026859	753.626	1117.68	16604.4	6.3	1169.49	1191.03	1033.27	1102.07	1202.65	1131.48	1124.45	1069.71	1087.65	1160.88	1019.04	1123.67	731.14
200859_x_at						Yes, but >10% FDR	0.040672	1050.57	1164.58	24.373	6.3	1211.85	1077.15	1125.23	1239.03	1130.7	1177.08	1052.79	1012	1040.46	1081.64	1063.05	1103.6	978.21
200863_s_at						Yes, but >10% FDR	0.014731	8322.2	9153.99	77.64	6.3	8866.27	9178.23	9521.68	8557.66	9210.09	9358.1	9267.73	8335.19	8719.32	8398.99	8480.89	8209.05	7951.44
200866_s_at						Yes, but >10% FDR	0.045269	2430.01	2686.44	944.367	6.3	2801.53	2724.92	2464.36	2864.37	2592.27	2815.16	2681.83	2621.18	2704.23	2495.3	2459.25	2425.39	2420.35
200869_at						Yes, but >10% FDR	0.028303	15479.8	16048.5	4.657	6.3	15956.9	15924.9	16013.5	16316	15825.9	15511	15782.1	15457.3	15361.2	15869.8	15065.9	15297.4	15468
200871_s_at						Yes, but >10% FDR	0.020292	7322.49	8838.6	18764.4	6.3	9140.14	9159.16	8243.26	8933.44	8737.47	8939.63	8939.63	8192	8841.04	8677.12	8970.67	8983.11	7342.22
200874_s_at						Yes, but >10% FDR	0.046347	181.851	193.78	209.592	6.3	199.24	190.28	185.59	200.3	192.4	199.88	187.27	200.3	173.89	185.98	179.89	186.37	179.4
200875_s_at						Yes, but >10% FDR	0.019726	3621.76	4385.95	6104.37	-1.5	3856.59	3590.58	3260.78	3856.3	3533.79	3907.42	3536.24	3504.52	3533.79	3676.2	3880.43	4081.83	4396.07
200876_s_at						Yes, but >10% FDR	0.0046234	4153.36	5206.52	9224.37	2.4	5233.08	5289.81	5393.48	5141.59	5311.85	5074.32	5419.71	4976.79	5393.48	4780.68	5173.77	4627.44	4190.77
200885_at						Yes, but >10% FDR	0.04152	2681	2924.53	5.495	6	2960.13	2805.42	2866.35	3038.2	2862.38	2644.9	2793.77	2693	2659.61	2764.88	2632.1	2817.11	2502.23
200886_s_at	Yes	11134.9	12258.5	1253.58	18.7528	Yes, but >10% FDR	0.002624	11181.9	12230.6	1604.37	6.3	12321.5	11869.7	12765.8	12331	12262.8	12161.2	12468.5	12018.8	12127.5	12152.8	10922.4	11537.2	10945.1
200898_s_at						Yes, but >10% FDR	0.012824	935.803	1235.57	14864.4	6.3	1272.5	1284.51	1321.54	1317.88	1158.47	1168.14	1245.06	1231.33	1133.84	1286.29	1202.65	1215.22	920.96
200900_s_at						Yes, but >10% FDR	0.036692	1552.12	1688.62	77.64	6.3	1687.1	1625.87	1663.49	1711.45	1719.77	1642.87	1799.03	1504.43	1662.34	1575.94	1563.97	1508.61	1533.91
200906_s_at	Yes	-248.76	188.383	54659.2	3.30915	Yes, but >10% FDR	0.016246	135.262	189.451	15824.4	6.3	192.52	193.47	192.4	199.6	189.49	199.6	195.9	180.64	165.42	170.9	192.4	186.63	135.58
200907_s_at						Yes, but >10% FDR	0.0022449	598.337	728.575	6584.37	1.2	754.19	725.08	727.6	768.55	731.64	684.54	728.61	734.19	705.74	711.64	693.14	655.75	599.24
200911_s_at						Yes, but >10% FDR	0.026313	3206.99	4056.71	1484.37	0.3	4020.37	3926.42	4150.3	4133.08	3706.91	3989.52	3766.48	3583.12	3885.81	3722.36	3538.69	3730.1	3195.89
200915_x_at						Yes, but >10% FDR	0.0082524	4111.95	4921.04	15164.4	-6	4216.35	3967.46	4228.7	4053.63	4107.37	3899.3	4067.71	3959.22	4311.58	4081.83	4420.52	4164.71	4956.14
200916_at						Yes, but >10% FDR	0.025798	3705.57	4457.98	3344.37	0.3	4399.46	4386.94	4482.23	4396.07	4408.28	4326.55	4438.94	4028.42	4081.83	4287.73	4317.56	3989.52	3766.48
200919_at						Yes, but >10% FDR	0.0023142	421.427	605.084	9284.37	-2.4	435.01	392.62	383.74	441.72	402.82	422.85	423.73	476.39	391.26	470.81	434.44	519.15	602.99
200921_s_at	Yes	2395.52	2896.5	3520.65	15.3948	Yes, but >10% FDR	0.0016582	2417.79	2901.98	3764.37	6.3	2927.26	2751.5	3061.45	2882.29	2900.33	2904.35	3006.77	2906.36	2838.67	2786.04	2745.78	2281.87	2509.18
200923_at						Yes, but >10% FDR	0.029278	1742.39	2058.94	2444.37	0.3	2077.55	2049.42	2001.69	2049.42	1920.15	2042.33	1990.62	1976.87	1996.14	1829.2	1992	1881.93	1775.49
200927_s_at	Yes	489.781	627.666	9543.68	13.398	Yes, but >10% FDR	0.0078915	498.067	627.127	8804.37	6.3	649.67	616.52	633.85	615.66	641.36	635.17	622.53	572.45	669.06	584.07	663.98	537.83	489.78
200929_at						Yes, but >10% FDR	0.016411	2333.71	3075.23	7004.37	1.2	3104.9	3082.75	3425.27	2965.38	2880.29	2981.87	3121.45	3067.82	3263.04	2880.29	2778.33	2795.71	2302.52
200935_at						Yes, but >10% FDR	0.017003	118.427	140.189	8684.37	3.3	135.47	134.27	138.05	140.65	140.85	133.53	148.88	142.42	137.47	148.67	138.72	126.76	119.02
200943_at	Yes	4261.07	4954.76	8292.05	21.6445	Yes, but >10% FDR	0.012104	4218.52	4971.88	6824.37	6.3	4898.83	4774.06	5184.54	4932.15	4904.87	4744.37	5141.59	4844.06	5300.82	4737.79	5039.27	4272.9	4261.07
200945_s_at	Yes	1557.58	1751.89	117.765	11.822	Yes, but >10% FDR	0.013026	1569.34	1746.78	108.105	5.7	1737.21	1639.45	1901.6	1757.12	1724.54	1747.41	1755.91	1628.13	1547.8	1621.37	1616.88	1479.61	1522.26
200946_x_at						Yes, but >10% FDR	0.044755	1761.02	2237.59	5444.37	0.9	2074.51	2273.97	2382.07	2315.33	2123.16	2316.93	2204.14	2323.36	1940.21	2172.29	2115.82	1959.13	1785.36
200947_s_at	yes	969.479	1399.93	22167.9	0.449284	Yes, and meet 10%FDR	0.00053686	1134.93	1398	2924.37	0.6	1370.25	1368.14	1439.15	1429.21	1365.3	1383.4	1397.86	1355.87	1367.19	1255.46	1267.7	1265.95	1152.06
200950_at	yes	2965.38	3653.24	9530.08	16.0579	Yes, and meet 10%FDR	0.00050338	2920.59	3661.36	9104.37	6.3	3704.34	3678.75	3608.04	3543.6	3630.62	3553.44	3790.05	3671.11	3813.76	3487.55	3704.34	3182.62	2965.38
200954_at						Yes, but >10% FDR	0.03151	839.844	1030.66	8324.37	6.3	1022.66	1068.23	1048.42	919.05	1005.71	1116.68	1045.52	995.31	1071.19	964.07	1060.11	884.06	841.02
200959_at						Yes, but >10% FDR	0.042339	2167.19	2492.99	40.046	6.3	2357.43	2362.34	2341.15	2652.25	2411.98	2832.77	2336.28	2055.11	2175.3	2166.27	2253.58	2217.93	2134.97
200965_s_at						Yes, but >10% FDR	0.023818	1781.66	2118.63	40.046	0.6	2033.7	2035.26	2176.81	2230.27	1948.3	2007.24	1930.82	1765.67	2021.21	1839.38	1875.42	1744.99	1716.2
200966_x_at						Yes, but >10% FDR	0.0043524	21314	23407.8	17144.4	6.3	23542.8	23283.2	24070.9	23283.2	22788.2	23299.3	23493.9	23026.4	23559.2	24037.5	23428.9	23526.5	21188.6
200968_s_at	Yes	8635.12	10438.2	-65424.3	1	No	0.64156	9087.92	9554.95	24.373	6.3	9682.89	9222.87	9184.59	9688.11	8877.88	10441.2	8810.45	9554.73	8635.12	9325.72	8828.79	9488.73	9203.71
200972_at	yes	3751.87	4541.35	10035.5	2.38921	Yes, and meet 10%FDR	0.00035115	3791.1	4550.55	9464.37	2.7	4533.96	4582.76	4570.07	4692.04	4491.56	4329.55	4672.57	4485.33	4544.8	4500.91	4494.67	4147.42	3805.84
200978_at	Yes	8737.47	9829.59	9401.1	15.1213	Yes, but >10% FDR	0.0076647	8786.55	9821.96	8384.37	6.3	9868.09	9775.81	9436.26	9521.68	10064.6	10085.5	10120.5	9974.3	9884.83	9495.31	9898.54	9045.6	8737.47
200981_x_at	Yes	7324.29	8117.59	76.1981	63.2352	Yes, but >10% FDR	0.0026104	7324.29	8123.2	65.796	6.3	8203.36	8439.84	8186.32	8163.66	7627.53	8084.82	8186.32	7166.24	7092.11	7221.09	7601.14	7538.18	7326.96
200985_s_at						Yes, but >10% FDR	0.048066	1746.88	2113.01	5444.37	0.9	2096.68	2202.61	2112.89	2091.03	2080.91	2015.61	2234.91	2247.34	1941.56	1948.3	2095.39	1857.31	1789.08
201000_at						Yes, but >10% FDR	0.045079	1674.66	1888.38	40.046	6.3	1906.15	1892.4	1712.63	1946.95	1784.12	2012.82	1787.84	1584.71	1734.13	1709.08	1655.44	1652	1759.56
201005_at						Yes, but >10% FDR	0.045133	1800.83	2036.56	2.834	6.3	1924.29	2010.03	2038.09	2145.35	1771.8	2014.21	1829.2	1779.18	1889.78	1748.62	1774.26	1787.84	1786.6
201007_at						Yes, but >10% FDR	0.020007	2814.19	3278.31	11624.4	6.3	3308.84	3432.4	3504.52	3256.26	3204.76	3213.66	3215.88	3267.56	3102.04	3265.3	3317.77	3147.52	2791.84
201008_s_at						Yes, but >10% FDR	0.038541	121.805	152.364	824.367	6.3	144.01	173.53	141.14	140.95	161.34	152.96	144.71	145.31	160.45	125.71	112.44	104.62	141.53
201009_s_at						Yes, but >10% FDR	0.018222	127.385	189.899	3344.37	6.3	171.41	183.42	202.53	153.6	210.4	220.25	185.34	188.45	170.31	192.27	158.13	123.3	126.24
201010_s_at	Yes	-34.3409	435.332	36225.2	0.766527	Yes, but >10% FDR	0.0019535	206.875	436.536	6284.37	1.2	448.03	429.05	472.44	354.34	423.73	451.32	429.64	453.51	454.46	402.82	329.01	334.07	212.01
201023_at						Yes, but >10% FDR	0.0015086	828.937	1075.27	14084.4	6.3	1123.15	1119.78	1100.54	1062.32	1036.86	1027.56	1139.35	1086.14	1081.64	1033.27	1051.33	1051.33	809.56
201028_s_at						Yes, but >10% FDR	0.024804	1673.88	1923.25	2.834	6.3	1782.48	1922.81	1976.87	2043.75	1634.92	1749.83	1804.02	1720.96	1521.21	1696.09	1715.01	1577.04	1555.32
201029_s_at						Yes, but >10% FDR	0.0099736	2154.04	2320.57	209.592	6.3	2363.98	2380.42	2299.33	2308.92	2247.34	2292.97	2326.59	2315.33	2142.38	2191.95	2230.27	2062.24	2198.04
201036_s_at						Yes, but >10% FDR	0.014977	211.449	319.551	2084.37	0.3	302.85	325.16	313.86	314.08	319.13	298.38	277.63	262.65	291.23	276.47	278.4	273.99	206.64
201041_s_at	yes	145.243	213.955	288.134	0.854769	Yes, and meet 10%FDR	0.00077113	148.655	214.489	247.319	0.9	195.92	209.09	209.96	243.37	214.23	210.26	190.28	200.02	168.78	171.73	148.98	138.72	154.45
201042_at						Yes, but >10% FDR	0.020561	289.135	322.719	1244.37	6.3	320.63	321.8	333.14	322.47	314.74	332.68	311.27	338.5	306.34	311.05	273.61	301.08	294.07
201043_s_at						Yes, but >10% FDR	0.022214	972.663	1236.09	77.64	1.2	1085.81	1192.69	1319.71	1352.11	1126.79	1301.54	1123.67	1050.6	1045.52	988.43	961.4	1083.89	873.7
201044_x_at						Yes, but >10% FDR	0.034535	75.207	88.458	19184.4	-6	77.79	71.61	76.69	81.57	73.26	76	71.46	74.03	78.9	74.54	75.53	72.35	88.59
201047_x_at	Yes	2483.47	2731.6	43.7258	18.2048	Yes, but >10% FDR	0.0054874	2483.47	2740.96	47.254	6.3	2612.71	2628.46	2809.31	2828.85	2821.02	2689.27	2668.85	2411.98	2547.74	2455.84	2540.68	2438.87	2505.7
201050_at						Yes, but >10% FDR	0.016611	278.968	330.401	47.254	5.1	327.93	321.57	366.58	325.16	297.35	329.7	311.48	269.85	270.6	279.95	294.68	299.21	261.38
201061_s_at	yes	844.904	1207.52	3608.76	0.393785	Yes, and meet 10%FDR	0.0011413	946.133	1199.1	764.367	0.6	1168.5	1180.35	1244.2	1271.22	1125.23	1190.21	1140.14	1087.65	1125.23	1073.42	1016.22	1021.87	936.41
201066_at						Yes, but >10% FDR	0.0036633	3064.06	3993.85	2144.37	0.6	3943.7	3795.3	4130.21	3937.32	3816.41	4219.92	3800.57	3915.55	3593.07	3600.55	3519.12	3509.38	3057.21
201071_x_at						Yes, but >10% FDR	0.021135	4035.87	4437.52	24.373	6.3	4309.25	4338.56	4396.07	4767.44	4371.76	4442.02	4017.27	4059.26	4039.61	4118.78	3784.8	4293.68	3937.32
201077_s_at	Yes	2894.66	3133.13	114.822	14.822	Yes, but >10% FDR	0.0018739	2885.76	3125.31	108.105	6.3	3167.95	3036.09	3154.07	3038.2	3123.61	3236.01	3176.01	2955.12	2932.67	2874.31	2894.3	2821.02	2951.02
201079_at	Yes	2232.18	2691.77	4880.39	85.6301	Yes, but >10% FDR	0.003148	2261.2	2697.82	5264.37	6.3	2699.65	2685.55	2872.32	2654.09	2547.74	2836.7	2694.87	2654.09	2724.92	2547.74	2702.35	2191.95	2272.4
201083_s_at	Yes	-17059.3	142.897	4.33382e+06	1.18046	Yes, but >10% FDR	0.0028781	96.241	142.08	11924.4	6.3	135.73	147.95	149.4	145.61	125.19	154.34	142.72	146.83	140.26	139.97	137.76	130.96	94.29
201084_s_at	yes	2077.36	2877.26	6603.05	1.38518	Yes, and meet 10%FDR	0.0013	2116.41	2857.95	6344.37	1.5	2858.64	2780.25	3147.52	2734.38	2736.28	2979.8	2920.5	2817.11	2930.64	2776.4	2667	2360.7	2166.27
201086_x_at						Yes, but >10% FDR	0.01206	1141.39	1287.36	65.796	6.3	1298.33	1316.96	1216.9	1279.18	1249.38	1321.54	1322.45	1053.52	1140.14	1228.77	1099.02	1174.64	1164.1
201090_x_at						Yes, but >10% FDR	0.033628	17291.7	19638.1	10484.4	6.3	19581.8	20115.2	20143.1	18484.1	19769.7	18833.3	20045.6	19838.3	19122.7	19309.2	20396	18651.5	17270.2
201095_at						Yes, but >10% FDR	0.019956	950.182	1060.68	209.592	3.6	1088.91	1053.52	1031.12	1107.43	960.07	1080.89	1126.01	1044.07	969.43	931.88	945.54	960.07	964.74
201101_s_at	yes	1227.89	1923.1	10715.9	1.20757	Yes, and meet 10%FDR	0.0010719	1369.22	1909.29	7484.37	1.8	1852.88	1856.02	2082.35	1960.49	1902.92	1810.28	2017.01	1858.6	1985.11	1834.28	1802.77	1585.81	1384.36
201114_x_at						Yes, and meet 10%FDR	0.0003053	6510.54	7770.09	5144.37	0.9	7908.08	7782.4	7680.58	7728.65	7659.32	7622.24	7995.65	7782.4	7606.41	7491.3	7151.35	7221.09	6521.55
201120_s_at						Yes, but >10% FDR	0.046684	2063.78	2363.14	209.592	0.9	2189.25	2258.27	2447.34	2498.77	2503.97	2362.34	2326.59	2145.35	2202.61	2158.78	2157.28	1853.45	2155.79
201122_x_at						Yes, and meet 10%FDR	0.0012667	1316.59	1823.86	16724.4	6.3	1864.33	1821.61	1944.25	1827.94	1640.59	1881.93	1816.57	1835.55	1797.78	1858.6	1776.72	1830.47	1295.24
201125_s_at						Yes, but >10% FDR	0.012109	1912.16	2405.78	12044.4	6.3	2463.42	2495.3	2352.53	2500.5	2252.01	2510.92	2406.97	2216.4	2471.21	2337.9	2337.9	2291.38	1889.78
201129_at	Yes	242.347	398.495	11976.1	10.0383	Yes, but >10% FDR	0.005985	251.687	403.644	12704.4	6.3	410.81	349.46	430.24	373.77	428.75	377.67	388.83	370.93	427.27	411.29	414.43	376.63	242.36
201130_s_at	Yes	265.156	321.945	238.968	0.861261	Yes, but >10% FDR	0.0046149	266.383	322.698	209.592	0.9	307.83	307.19	336.39	346.09	303.8	327.87	310.83	290.22	296.32	283.66	262.1	256.89	277.43
201131_s_at	Yes	-10756.1	1643.33	98637.7	2.82445	Yes, but >10% FDR	0.013454	1254.24	1651.83	15164.4	6.3	1680.88	1755.91	1752.26	1661.19	1561.81	1547.8	1645.15	1547.8	1754.69	1600.16	1560.72	1631.52	1227.07
201139_s_at	Yes	1452.57	2301.63	29782.8	-16.7558	Yes, but >10% FDR	0.0025213	1452.07	1879.47	18164.4	-6	1385.74	1342.77	1450.16	1450.16	1464.3	1579.22	1420.32	1453.18	1543.51	1483.72	1472.45	1385.32	1902.92
201142_at						Yes, and meet 10%FDR	0.00095722	745.453	974.475	15404.4	-6	730.46	698.93	747.54	737.76	716.09	722.57	786.88	705.74	761.13	764.83	805.64	755.87	989.8
201149_s_at	Yes	75.2808	94.6842	19067.3	-3.25358	Yes, but >10% FDR	0.0051927	74.919	89.993	13004.4	-6	76.27	73.67	75.32	77.39	77.92	77.28	79.12	73.41	69.7	72.55	75.53	77.39	91.08
201152_s_at						Yes, but >10% FDR	0.00503	1467.98	1775.48	13844.4	6.3	1788.8	1822.88	1748.62	1876.72	1766.89	1729.33	1815.31	1716.2	1829.2	1725.74	1691.4	1742.57	1446.15
201153_s_at	Yes	1116.68	1478.79	10001.2	18.3166	Yes, but >10% FDR	0.0045646	1108.84	1478.96	10064.4	6.3	1502.58	1417.37	1486.81	1351.18	1499.22	1370.99	1538.17	1528.61	1562.89	1501.3	1507.56	1297.93	1116.68
201157_s_at						Yes, but >10% FDR	0.039845	1375.36	1592.28	8324.37	1.2	1629.01	1514.89	1616.88	1601.27	1582.51	1652	1673.9	1489.9	1615.76	1546.72	1528.61	1511.75	1367.19
201190_s_at	Yes	837.714	1044.87	5791.04	1.92664	Yes, but >10% FDR	0.0084935	842.78	1042.84	5564.37	2.1	1050.93	1035.42	1045.52	1108.2	1045.52	1052.06	1076.4	931.88	1019.75	1086.14	974.15	900.76	841.61
201195_s_at						Yes, and meet 10%FDR	0.0013178	3345.1	4279.29	1784.37	-3	3316.75	3516.68	3285.73	3380.45	3224.81	2880.29	3509.38	3211.43	3550.98	3516.68	4161.82	4365.71	4067.71
201198_s_at	yes	1204.27	1740.13	11840.7	3.74374	Yes, and meet 10%FDR	0.0012993	1235.45	1740.13	10904.4	6.3	1787.84	1817.83	1666.96	1738.95	1581.41	1866.35	1671.58	1752.26	1737.74	1781.65	1734.13	1554.25	1220.28
201205_at	Yes	90.266	109.55	3866.61	-13.5488	Yes, but >10% FDR	0.012649	90.061	108.916	4484.37	-6	92.88	83.34	97.68	85.09	91.65	94.09	87.12	83.52	95.01	92.28	92.54	114.48	104.62
201212_at						Yes, but >10% FDR	0.028334	1037.04	1138.91	704.367	6.3	1144.54	1118.23	1113.59	1129.92	1157.66	1069.71	1152.06	1160.88	1213.53	1010.6	1086.9	1050.6	991.87
201214_s_at	Yes	571.343	723.478	41.4168	14.5992	Yes, but >10% FDR	0.0075405	567.978	726.842	40.046	6.3	709.39	739.29	714.11	731.14	637.38	809.56	650.32	570.07	560.28	551.8	657.57	575.63	512.71
201217_x_at						Yes, but >10% FDR	0.029134	18805.4	19847.9	14.834	1.5	19364.3	19990.1	19934.8	20171.1	19524.5	19309.2	19295.8	18280.3	19202.4	18255	19122.7	18703.2	19269.1
201226_at	yes	2199.81	2517.53	759.577	1.27361	Yes, and meet 10%FDR	0.0012702	2216.65	2519.03	644.367	1.2	2496.46	2569.02	2524.88	2523.13	2433.81	2576.15	2565.46	2382.07	2443.95	2373.83	2175.3	2155.79	2285.03
201231_s_at						Yes, but >10% FDR	0.0037763	10781.6	12951.3	17684.4	6.3	12896.3	12704	12953	12748.1	12348.1	12774.7	13578.2	12748.1	12926.1	12598.8	13493.7	13179.4	10631.1
201232_s_at						Yes, but >10% FDR	0.023856	831.993	959.256	11204.4	3.6	961.03	959.41	955.43	943.58	967.42	1038.29	980.25	934.47	978.21	913.33	943.58	909.54	827.72
201243_s_at						Yes, but >10% FDR	0.019886	6416.21	7281.31	16904.4	6.3	7457.91	7606.41	7296.56	7632.82	7048.01	7141.44	7291.5	7106.88	7281.4	7367.71	7062.68	7301.62	6369.66
201244_s_at	Yes	-8979.81	683.254	79461.9	3.756	Yes, but >10% FDR	0.022111	451.368	698.646	14744.4	6.3	714.82	722.57	703.79	734.69	629.91	743.4	727.09	598.83	631.22	671.85	636.05	680.76	440.5
201245_s_at	Yes	884.773	1040.34	359.214	12.7754	Yes, but >10% FDR	0.0073856	890.056	1033.83	344.367	6.3	1021.24	1078.64	1054.25	983.65	1037.58	1130.7	966.75	1049.87	947.51	874.31	940.31	893.3	831.17
201250_s_at	yes	1053.42	1225.83	1346.89	-1.82976	Yes, and meet 10%FDR	0.0007013	1054.46	1211.38	1004.37	-6	1040.7	1105.13	1052.06	1074.17	1039.73	1025.42	1070.45	1054.25	1015.52	1162.49	1154.46	1259.82	1213.53
201267_s_at						Yes, but >10% FDR	0.023435	3136.16	3677.74	4364.37	0.6	3649.12	3750.85	3663.48	3663.48	3735.28	3608.04	3709.48	3403.96	3701.77	3340.85	3565.78	3401.61	3184.83
201269_s_at	Yes	71.3968	79.4742	5.38118	7.81262	Yes, but >10% FDR	0.0085902	71.255	79.307	5.495	6.3	77.5	79.78	79.84	80.78	77.87	71.21	69.02	70.47	70.77	69.74	76.37	76	67.6
201275_at						Yes, but >10% FDR	0.022856	1599.84	1727.23	177.621	1.8	1758.61	1699.62	1675.06	1760.78	1699.62	1829.2	1723.35	1668.11	1657.74	1546.72	1634.92	1558.56	1648.57
201302_at						Yes, but >10% FDR	0.029086	8780.14	9512.36	1064.37	6.3	9436.26	9171.87	10078.5	9482.16	9222.87	9701.55	9184.59	9312.8	9654.59	9102.2	8847.17	8713.28	8677.12
201310_s_at						Yes, but >10% FDR	0.037614	648.097	796.299	91.615	6.3	762.36	846.29	735.2	864.07	801.75	685.97	915.24	663.06	692.66	651.22	697.48	636.93	558.73
201311_s_at	Yes	713.753	836.946	357.341	11.0986	Yes, but >10% FDR	0.0019359	709.374	833.345	344.367	4.8	766.84	818.59	856.32	892.68	821.43	864.07	837.53	838.11	763.24	710.16	737.24	708.68	698.93
201328_at						Yes, but >10% FDR	0.032842	686.997	1026.12	4064.37	0.6	1025.03	1089.16	910.81	1163.29	922.88	1009.2	1085.39	926.08	935.76	948.83	864.67	887.74	671.85
201347_x_at	Yes	2900.83	3586.38	2182.08	0.505543	Yes, but >10% FDR	0.002247	3006.67	3593.8	944.367	0.6	3526.99	3671.11	3420.52	3745.65	3502.09	3588.09	3528.89	3350.13	3343.17	3411.05	3242.75	3006.77	3091.3
201360_at	yes	1662.82	2218.22	1507.03	0.39049	Yes, and meet 10%FDR	0.0014317	1769.42	2198.52	584.367	0.6	2209.07	2320.15	2096.84	2207.2	2057.96	2196.51	2142.38	2018.41	2115.82	1875.42	1895.02	1861.18	1792.8
201368_at						Yes, but >10% FDR	0.028027	1261.6	1866.01	2204.37	0.3	1899.7	1825.4	1796.53	1884.54	1622.5	1748.62	1780.42	1604.6	1630.39	1682.04	1557.48	1696.09	1237.32
201384_s_at						Yes, but >10% FDR	0.02362	1680.74	1939.99	47.254	6.3	1835.7	1809.03	1836.83	2108.5	2014.21	1980.98	1863.76	1631.52	1782.89	1703.16	1729.33	1697.27	1540.3
201390_s_at	Yes	3214.81	3567.85	106.417	25.4804	Yes, but >10% FDR	0.0055273	3216.1	3574.54	77.64	6.3	3541.96	3408.69	3598.05	3563.3	3550.98	3628.1	3683.85	3222.58	3147.52	3378.11	3382.79	3102.04	3063.57
201402_at	Yes	80.4723	314.877	40902	-7.92482	Yes, but >10% FDR	0.0023786	80.273	97.939	17144.4	-6	79.84	79.62	77.71	78.79	83.46	81.29	77.44	83.98	81.46	77.17	85.51	79.4	98.98
201404_x_at						Yes, but >10% FDR	0.017813	139.352	168.607	15824.4	-6	138.78	137.47	133.71	139.3	144.41	130.6	132.33	141.63	145.61	143.91	152.11	140.56	169.6
201411_s_at						Yes, but >10% FDR	0.025853	349.424	420.475	764.367	1.8	425.17	461.76	415.87	397.55	365.57	441.11	427.86	423.44	397.55	380.57	338.26	366.58	344.65
201412_at						Yes, and meet 10%FDR	0.0010854	1930.26	2466.34	10484.4	3.9	2436.06	2495.3	2474.63	2464.36	2373.83	2657.77	2411.98	2449.04	2359.07	2430.44	2428.75	2225.63	1916.16
201413_at						Yes, but >10% FDR	0.03491	1892.75	2516.22	4724.37	0.6	2424.27	2503.97	2608.49	2411.98	2486.67	2751.5	2452.44	2239.56	2533.65	2352.53	2127.58	2324.98	1912.18
201414_s_at	Yes	879.17	954.558	-16853	1	No		939.32	1027.36	0.459	6.3	973.62	1067.48	972.8	945.54	970.78	928.01	948.17	956.09	879.17	971.45	887.74	1028.27	920.33
201416_at						Yes, but >10% FDR	0.03588	199.013	359.042	15164.4	6.3	376.6	373.51	316.27	397.28	318.69	366.58	374.29	308.05	380.04	346.33	286.62	348.74	195.09
201432_at	Yes	2805.71	3214.9	190.82	3.12867	Yes, but >10% FDR	0.0037697	2805.28	3223.14	177.621	3.3	3219.6	3222.58	3017.21	3399.25	3063.57	3340.85	3240.5	3127.95	2854.46	2799.59	2944.89	2678.11	2799.59
201440_at						Yes, but >10% FDR	0.047542	395.174	552.305	18044.4	6.3	570.91	569.68	516.28	594.28	524.57	595.52	574.04	553.72	519.15	520.59	467.56	561.83	393.17
201444_s_at	Yes	2926.44	3615.12	5127.71	2.94754	Yes, but >10% FDR	0.0068553	2925.55	3588.8	5384.37	3	3667.15	3463.46	3956.48	3563.3	3842.95	3516.68	3470.67	3563.3	3461.06	3640.7	3461.06	3013.03	2928.61
201456_s_at	Yes	830.019	1070.59	10534.7	12.8467	Yes, but >10% FDR	0.006208	832.974	1074.93	10964.4	6.3	1060.11	1090.67	1063.79	1091.43	971.45	1044.79	1085.39	1049.15	1159.27	1068.23	1092.18	989.12	830.02
201467_s_at	Yes	3984.88	4535.1	123.991	18.1846	Yes, but >10% FDR	0.007185	3955.52	4531.68	127.564	6.3	4466.03	4541.65	4669.33	4557.41	4252.22	4813.93	4445.1	4269.94	3748.25	4147.42	4211.15	3915.55	3902.01
201483_s_at	Yes	1579.76	2447.88	10859.9	0.4612	Yes, but >10% FDR	0.0052576	1838.87	2431.2	2564.37	0.6	2306.61	2357.43	2512.66	2545.97	2393.66	2585.09	2398.64	2328.2	2198.04	2091.03	2269.25	2065.11	1867.64
201484_at						Yes, but >10% FDR	0.023893	796.95	905.481	77.64	6.3	876.94	891.44	938.36	954.1	887.74	831.17	970.78	771.76	849.22	769.62	836.95	777.66	794.55
201491_at						Yes, but >10% FDR	0.0308	2584.44	2867.79	209.592	6.3	2812.34	2981.87	2679.97	2940.81	2990.15	2981.87	2704.23	2938.78	2542.44	2524.88	2512.66	2786.04	2542.44
201492_s_at	Yes	-128952	36576.3	39518.2	17.3326	Yes, but >10% FDR	0.03401	35223.2	36692.9	18284.4	6.3	36891.5	36814.8	36408.8	35957.4	36738.4	36789.3	36738.4	36585.9	36509.9	36333.2	36308	36840.4	35193
201494_at	Yes	-1.48844e+06	1914.84	1.39183e+08	0.980649	Yes, but >10% FDR	0.0057406	1536.27	1916.65	10904.4	5.7	1958.83	1897.65	1933.5	1913.5	1933.5	1889.78	2038.09	1863.76	1748.62	1909.53	1922.81	1773.03	1537.1
201506_at	Yes	889.054	7404.46	32011.6	15.6166	Yes, but >10% FDR	0.015618	5773.25	7414.34	18044.4	6.3	7616.38	7043.13	7372.82	7760.86	7388.16	7281.4	7945.93	6984.79	7798.6	7009.03	7009.03	7643.41	5669.48
201515_s_at						Yes, but >10% FDR	0.04694	1564.93	1936.85	2564.37	0.6	1829.77	1909.53	2073.71	1987.86	1970.03	1829.2	2000.3	1673.9	1932.16	1816.57	1762	1655.44	1620.25
201516_at	Yes	1147.45	1374.44	30.53	1.54522	Yes, but >10% FDR	0.0097224	1145.6	1385.85	28.76	1.5	1286.19	1409.53	1369.09	1450.16	1364.35	1280.95	1278.29	1149.67	1068.23	1140.14	1297.03	1059.38	1177.9
201517_at						Yes, but >10% FDR	0.046375	448.928	564.542	2384.37	2.1	536.21	481.37	600.08	560.28	623.83	535.97	606.35	536.34	602.99	537.08	487.41	462.4	442.34
201518_at						Yes, but >10% FDR	0.031775	1228.7	1417.8	3944.37	6.3	1468.71	1360.57	1393.02	1430.2	1310.59	1480.63	1526.49	1375.75	1363.41	1419.34	1367.19	1198.49	1242.47
201526_at						Yes, but >10% FDR	0.041105	228.839	322.307	2684.37	0.6	322.19	347.29	283.07	341.32	334.3	290.42	342.27	288.61	328.78	258.85	292.85	257.25	235.4
201531_at						Yes, but >10% FDR	0.020395	1017.02	1177.91	824.367	-6	1046.97	1050.6	911.44	1041.9	1010.6	1044.07	1041.18	1083.14	910.81	1164.91	1160.07	1215.22	1132.27
201535_at	Yes	349.461	489.107	9284.32	13.4999	Yes, but >10% FDR	0.012258	356.994	488.675	8264.37	6.3	486.21	439.89	452.57	458.25	527.86	468.86	504.6	477.71	544.2	492.17	527.86	386.95	349.46
201538_s_at	Yes	129.227	145.428	212.559	-2.53941	Yes, but >10% FDR	0.012353	129.417	145.839	209.592	-2.4	126	130.24	135.2	128.62	134.64	124.85	124.07	134.27	140.26	152.32	152.75	137.19	140.65
201540_at						Yes, but >10% FDR	0.037964	458.136	498.821	5504.37	6.3	509.29	503.2	505.65	477.71	493.19	478.71	516.99	506.35	494.9	493.87	505.3	447.58	470.16
201541_s_at						Yes, but >10% FDR	0.027308	2947.98	3295.07	77.64	6.3	3271.59	3263.04	3317.77	3430.02	3218.11	3112.81	3437.16	2918.48	2864.37	2898.32	3057.21	2836.7	3240.5
201550_x_at						Yes, but >10% FDR	0.047168	19867.7	22875.4	10904.4	6.3	23127.7	24054.2	22319.2	21291.7	22599.5	21859.9	22646.5	22819.8	23106.3	23559.2	23428.9	21769.2	19893.4
201551_s_at	Yes	691.92	802.339	1041.48	14.1047	Yes, but >10% FDR	0.010083	692.138	800.917	944.367	6.3	767.07	768.02	822.57	827.72	780.9	822	754.3	809	869.47	723.58	716.09	698.44	661.23
201552_at						Yes, but >10% FDR	0.032042	617.534	711.502	91.615	6	724.02	680.29	770.15	668.14	670.46	772.29	719.57	632.53	588.95	613.53	613.11	688.35	588.95
201553_s_at						Yes, but >10% FDR	0.019667	5160.51	5841.49	91.615	4.5	5867.15	6105.95	5541.27	6212.68	5253.27	6026.06	5820.79	5304.5	5001	5271.51	5159.44	5315.54	4973.34
201554_x_at	Yes	937.479	1364.44	10059.6	2.1097	Yes, but >10% FDR	0.0063159	972.594	1357.87	9464.37	3	1331.75	1376.7	1425.25	1452.18	1403.68	1227.07	1396.89	1263.32	1465.32	1284.51	1341.84	1149.67	976.85
201571_s_at						Yes, but >10% FDR	0.02637	793.029	1023.11	3464.37	0.9	1034.78	1059.38	1057.18	985.01	895.78	1080.14	1076.4	964.07	974.83	939.01	958.08	834.06	829.44
201575_at						Yes, but >10% FDR	0.037011	1726.34	1954.22	524.367	1.5	1970.18	1831.74	1967.3	1955.06	1936.18	2205.67	1908.2	1922.81	1854.74	1805.27	1720.96	1668.11	1786.6
201576_s_at						Yes, but >10% FDR	0.031196	1084.94	1479.7	3524.37	0.6	1453.18	1642.87	1370.04	1470.41	1347.44	1574.85	1465.32	1448.15	1313.32	1323.37	1353.99	1295.24	1066.01
201579_at						Yes, but >10% FDR	0.013661	3603.56	5153.2	17564.4	6.3	5313.49	5378.54	5434.76	5716.83	4983.69	5393.48	5077.84	5067.29	4949.27	5155.87	4451.27	5198.93	3573.2
201580_s_at	Yes	92.8682	421.388	336236	0.321686	Yes, but >10% FDR	0.0020847	293.873	414.573	4064.37	0.6	423.79	410.43	422.85	416.45	417.9	397	409.3	400.87	384.01	360.54	400.87	310.19	326.06
201581_at						Yes, but >10% FDR	0.038586	506.326	601.677	464.367	6.3	576.78	561.06	662.6	606.77	640.03	554.87	618.23	613.53	586.1	487.75	579.63	496.28	463.36
201585_s_at						Yes, but >10% FDR	0.037745	1088.54	1205.32	108.105	5.7	1184.18	1126.01	1199.32	1327.04	1181.99	1243.34	1216.06	1129.13	1057.91	1140.14	1026.84	1063.79	1127.57
201589_at						Yes, but >10% FDR	0.047513	1088.14	1210.17	5684.37	6.3	1241.52	1205.15	1213.53	1240.75	1205.15	1224.52	1194.34	1239.89	1183.63	1112.05	1226.22	1068.97	1122.89
201590_x_at						Yes, but >10% FDR	0.027235	36334.8	38231.5	19184.4	6.3	38295.5	38458.1	38511.4	38591.6	37302.9	38245.4	38325.1	37536.3	38086.7	38060.3	38033.9	38431.5	36358.4
201597_at						Yes, but >10% FDR	0.028675	4709.6	5568.87	9644.37	6.3	5575.08	5363.65	6148.42	5529.76	5568.22	5514.45	5315.54	5537.43	5480.15	5415.95	5583.68	5091.94	4714.86
201603_at	Yes	317.996	362.386	225.708	4.85218	Yes, but >10% FDR	0.0064084	317.628	363.351	209.592	4.5	370.33	340.38	365.82	348.01	363.04	356.81	392.62	359.79	321.8	316.05	307.62	335.23	313
201616_s_at	Yes	424.857	604.689	3579.38	0.740118	Yes, but >10% FDR	0.0022739	453.487	605.855	1904.37	0.9	554.48	586.1	617.37	629.91	582.86	631.22	642.25	582.86	561.44	551.42	501.81	512.36	441.11
201618_x_at						Yes, but >10% FDR	0.024133	354.619	515.238	16004.4	6.3	537.37	598.83	500.42	546.47	489.78	522.76	514.13	468.53	493.19	465.29	502.51	513.07	345.61
201620_at	Yes	648.442	795.284	133.32	0.526566	Yes, but >10% FDR	0.013441	658.063	791.245	108.105	0.6	763.18	797.31	816.89	820.86	711.15	818.59	689.78	730.63	707.7	688.83	702.33	629.91	659.4
201625_s_at	Yes	92.7339	114.67	4307.01	-2.93346	Yes, but >10% FDR	0.0035507	92.566	115.624	4604.37	-2.4	93.83	101.41	94.35	89.95	93.96	87.91	83.69	92.6	98.56	91.33	100.01	112.6	114.88
201629_s_at	Yes	2679.34	3029.54	303.922	16.1978	Yes, but >10% FDR	0.0018477	2675.58	3024.57	247.319	6.3	2939.91	2955.12	3046.63	3220.35	2953.07	3008.86	3072.08	3040.3	2693	2803.47	2540.68	2659.61	2713.61
201630_s_at						Yes, but >10% FDR	0.017656	4031.37	5023.49	9284.37	6.3	4997.53	5224.22	5606.95	4891.29	4787.31	5106.08	5106.08	4800.6	4807.26	4891.29	5063.78	4417.46	4053.63
201631_s_at						Yes, but >10% FDR	0.017963	3048.36	4093.54	1964.37	-1.2	3082.51	2953.07	2606.68	3640.7	2824.93	3091.3	2852.48	3308.59	2924.55	3643.22	3453.87	4255.17	3975.72
201632_at						Yes, but >10% FDR	0.022515	2181.62	2452.15	33.937	4.8	2359.07	2454.14	2422.03	2689.27	2259.83	2514.4	2273.97	2172.29	2266.11	2149.82	2213.33	2187.4	2107.04
201633_s_at						Yes, but >10% FDR	0.028911	2473.96	3120.57	2204.37	0.6	2884.96	3269.83	3432.4	3213.66	3127.95	2870.33	3002.61	3029.79	2920.5	2842.61	2776.4	2828.85	2447.34
201645_at						Yes, but >10% FDR	0.044089	111.852	149.146	14204.4	4.2	151.82	150.33	156.82	155.09	148.98	137.47	128.44	149.6	155.2	162.24	147.75	142.32	113.61
201648_at						Yes, but >10% FDR	0.049802	2491.16	2780.44	28.76	5.1	2704.64	2500.5	2819.06	3044.52	2740.08	2780.25	2537.16	2413.65	2403.63	2594.07	2510.92	2514.4	2493.58
201659_s_at	Yes	1537.58	1849.15	422.241	1.21645	Yes, but >10% FDR	0.0033243	1542.64	1864.25	344.367	1.2	1765.81	1822.88	1997.53	1821.61	1834.28	1773.03	1936.18	1757.12	1716.2	1571.58	1655.44	1486.81	1534.98
201673_s_at						Yes, but >10% FDR	0.042163	150.824	168.851	6.484	6.3	167.3	168.78	169.84	171.02	167.15	147.34	149.91	153.06	153.81	159.9	151.38	162.47	129.34
201676_x_at						Yes, but >10% FDR	0.045763	9025.64	9795.98	5504.37	6.3	9874.94	9823.35	10162.7	9926.02	10162.7	9469.02	9701.55	9235.66	9932.91	9891.68	9775.81	9033.07	9051.87
201678_s_at						Yes, but >10% FDR	0.038185	427.723	517.114	644.367	6.3	516.63	522.03	522.76	586.1	489.78	480.04	527.49	464.33	541.19	407.03	421.09	395.08	484.05
201685_s_at	Yes	126.232	152.124	110.094	13.4534	Yes, but >10% FDR	0.0029622	126.989	153.561	91.615	6.3	144.63	152.01	148.78	143.51	163.26	147.03	165.65	130.78	122.87	131.6	119.84	130.87	125.98
201692_at						Yes, but >10% FDR	0.029666	1007.62	1235.43	17264.4	-6	1020.46	1044.07	1006.41	1089.92	1063.05	1035.42	1014.81	989.12	1036.14	936.41	893.3	996.69	1247.65
201697_s_at						Yes, but >10% FDR	0.011749	507.131	632.694	9284.37	1.2	649.67	627.29	648.52	643.59	615.66	636.93	625.99	619.52	605.09	652.58	566.13	604.25	506.7
201698_s_at						Yes, but >10% FDR	0.025908	2537.56	2770.15	150.526	5.4	2711.94	2721.15	2938.78	2740.08	2667	2977.74	2786.04	2707.98	2524.88	2612.11	2497.03	2608.49	2479.79
201701_s_at						Yes, but >10% FDR	0.036294	410.314	514.311	177.621	6.3	493.15	503.55	538.57	506	533.74	522.76	498.69	513.07	377.94	480.7	438.06	469.83	338.26
201723_s_at						Yes, but >10% FDR	0.0086336	2368.31	2811.01	209.592	6.3	2825.37	2880.29	2805.42	2826.89	2776.4	2606.68	2850.5	2878.3	2336.28	2617.55	2411.98	2516.15	2129.06
201755_at						Yes, but >10% FDR	0.017305	140.69	154.717	55.76	4.5	148.33	157.59	152.22	150.02	150.54	166.23	151.69	141.63	142.32	139.49	140.26	145.51	134.92
201765_s_at	Yes	1434.71	1649.59	128.593	13.9113	Yes, but >10% FDR	0.008547	1447.9	1644.85	127.564	6.3	1673.26	1640.59	1614.64	1693.74	1513.84	1709.08	1701.98	1571.58	1393.02	1461.26	1465.32	1529.66	1324.29
201770_at						Yes, but >10% FDR	0.020761	1271.44	1485.17	40.046	5.1	1439.59	1490.93	1385.32	1605.71	1502.34	1449.16	1378.61	1213.53	1423.28	1231.33	1294.34	1320.62	1190.21
201773_at	Yes	-68453.6	715.413	43278.7	15.1705	Yes, but >10% FDR	0.013547	465.943	720.106	17564.4	6.3	765.19	691.7	689.78	777.66	724.58	799.53	750.65	650.77	660.31	686.92	648.07	739.8	450.07
201778_s_at	Yes	1521.02	1831.68	9361.65	3.64342	Yes, but >10% FDR	0.0026991	1511.15	1830.66	9584.37	3.3	1882.22	1810.28	1889.78	1826.67	1872.82	1847.04	1787.84	1703.16	1885.85	1810.28	1825.4	1657.74	1525.43
201779_s_at						Yes, but >10% FDR	0.022457	2190.86	2406.93	77.64	6.3	2327.84	2427.07	2531.89	2355.8	2380.42	2413.65	2472.92	2167.78	2205.67	2143.87	2266.11	2033.85	2347.65
201780_s_at						Yes, but >10% FDR	0.027176	817.23	909.76	47.254	5.4	895.92	863.47	975.5	870.68	939.66	897.64	879.17	807.32	845.11	777.66	818.02	791.8	866.47
201791_s_at						Yes, but >10% FDR	0.037203	134.242	154.073	9.029	2.7	149.87	168.9	141.14	148.57	152.32	139.3	133.16	120.09	132.7	136.62	141.34	135.58	134.08
201800_s_at						Yes, but >10% FDR	0.0032839	953.244	1047.35	14.834	0.9	1033.51	1058.64	1030.41	1086.14	983.65	1007.11	995.31	951.46	973.47	955.43	969.43	924.8	944.89
201804_x_at						Yes, but >10% FDR	0.016523	2938.37	3322.89	91.615	6.3	3324.42	3265.3	3127.95	3456.27	3260.78	3465.87	3361.76	2990.15	3036.09	2981.87	3182.62	2704.23	2789.9
201812_s_at						Yes, but >10% FDR	0.039728	8128.22	9433.31	12164.4	3.9	9617.49	9482.16	9455.91	10078.5	9235.66	9390.59	9384.08	9667.99	8749.59	9146.47	9319.26	9020.55	8129.78
201813_s_at						Yes, but >10% FDR	0.023607	668.612	811.618	4244.37	1.8	800.88	739.8	826.57	869.47	787.43	834.63	744.43	832.32	841.02	804.53	748.57	702.33	663.52
201819_at						Yes, but >10% FDR	0.018782	337.739	483.718	1004.37	0.3	474.6	459.53	503.9	512	417.9	445.1	435.94	415.87	430.84	442.34	384.01	410.72	338.03
201825_s_at						Yes, but >10% FDR	0.039152	1699.62	1924.16	704.367	6.3	1886.87	1980.98	1791.56	1992	1996.14	1865.05	1905.56	1804.02	2022.61	1668.11	1825.4	1710.26	1595.73
201827_at						Yes, and meet 10%FDR	0.00028791	136.301	197.53	11264.4	-6	141.05	125.71	132.06	134.83	132.42	137	133.53	147.75	127.12	145.92	147.03	156.17	201.27
201828_x_at	Yes	2128.42	2441.78	9.1633	0.783025	Yes, but >10% FDR	0.0060129	2162.49	2459.81	3.344	6.3	2360.16	2481.51	2420.35	2507.44	2187.4	2252.01	2245.78	2205.67	2088.14	2231.81	2205.67	2109.96	1993.38
201847_at						Yes, but >10% FDR	0.027323	2822.36	3050.42	108.105	2.4	3047.57	3112.81	2884.29	3093.45	2992.22	3106.34	3050.86	2902.34	2902.34	2736.28	2971.55	2732.49	2776.4
201850_at						Yes, but >10% FDR	0.048865	2158.97	2356.15	65.796	6.3	2313.19	2346.02	2305.72	2524.88	2216.4	2512.66	2352.53	2139.41	2052.26	2201.09	2155.79	2253.58	2188.91
201856_s_at						Yes, but >10% FDR	0.013287	255.171	338.604	8564.37	1.8	336.99	350.19	384.01	337.09	345.61	336.86	318.69	315.61	331.76	354.1	316.05	297.35	253.88
201864_at	Yes	468.51	533.743	1025.58	-11.5414	Yes, but >10% FDR	0.0051077	467.565	534.751	944.367	-5.7	488.2	480.04	457.3	465.94	467.56	445.72	448.2	502.51	461.12	515.2	518.79	556.41	526.03
201879_at						Yes, but >10% FDR	0.0046814	422.826	606.835	13964.4	6.3	588.95	622.96	643.59	579.23	585.69	591.81	581.24	647.17	598	667.21	559.11	587.73	409.3
201882_x_at	yes	64.0865	1243.45	603449	-1.38937	Yes, and meet 10%FDR	0.00017188	64.068	80.772	12464.4	-6	65.5	64.13	65.71	63.16	65.89	61.1	66.03	63.96	61.82	62.29	66.9	67.56	82.08
201884_at						Yes, but >10% FDR	0.020824	3447.37	3930.5	9944.37	6.3	3982.15	3942.79	3931.87	4170.49	3758.65	4031.22	3816.41	3813.76	3824.35	4017.27	3970.21	3683.85	3434.78
201887_at	Yes	783.061	956.589	11822.9	10.339	Yes, but >10% FDR	0.0020719	794.191	957.778	12884.4	6.3	988.89	954.76	936.41	926.08	968.76	910.81	988.43	944.89	982.29	942.27	978.89	930.59	783.07
201895_at	Yes	361.535	496.613	11165.9	10.503	Yes, but >10% FDR	0.0084333	365.721	495.175	12044.4	6.3	503.63	498	477.71	541.57	523.48	485.73	482.71	494.9	500.42	440.81	513.78	464.33	361.54
201899_s_at						Yes, but >10% FDR	0.011957	3087.13	3973.44	11384.4	4.8	3901.4	3885.81	4110.22	4048.02	4190.77	4020.06	4240.45	3696.64	4161.82	3681.3	3813.76	3666.02	3048.75
201900_s_at						Yes, but >10% FDR	0.015243	2020.74	2419.18	2444.37	0.3	2363.07	2447.34	2447.34	2346.02	2344.4	2321.75	2323.36	2288.2	2233.36	2341.15	2211.79	2269.25	2011.42
201902_s_at	Yes	128.98	142.154	-5877.94	1	No		133.534	150.384	77.64	0.9	145.75	166	139.39	153.49	146.83	145.01	145.21	144.31	128.98	139.78	134.27	135.67	132.24
201908_at	Yes	390.054	595.146	39314.8	-0.917472	Yes, but >10% FDR	0.012253	390.178	479.618	7664.37	-1.5	424.35	372.48	403.38	372.99	391.26	406.75	374.55	392.62	368.11	394.26	428.46	426.68	481.37
201920_at	yes	2713.55	4782.35	13183.1	-1.0171	Yes, and meet 10%FDR	2.186e-06	2736.52	4222.58	7004.37	-1.5	2827.76	2670.7	2648.57	2872.32	2713.61	2719.26	2698.61	2547.74	2803.47	2824.93	3198.1	3560.84	4167.6
201924_at						Yes, but >10% FDR	0.035533	654.616	783.145	3.946	6.3	747.94	814.63	757.97	836.37	697.96	675.12	704.77	669.53	714.11	625.56	572.45	717.08	563.78
201940_at	Yes	296.727	1105.03	62853	0.718689	Yes, but >10% FDR	0.0082011	798.664	1100.39	6764.37	1.2	1112.47	1124.45	1147.28	1142.52	1099.02	952.78	1129.92	1057.91	1171.39	1046.24	996	946.2	803.97
201941_at	Yes	1592.42	3008.08	88753.3	0.329312	Yes, but >10% FDR	0.0020101	2389.95	2984.61	1424.37	0.6	2916.45	2971.55	3112.81	3008.86	2948.98	2948.98	2894.3	2906.36	2572.58	2830.81	2678.11	2592.27	2388.68
201942_s_at	Yes	636.672	917.352	4250.27	0.809179	Yes, but >10% FDR	0.0022947	650.659	918.272	3584.37	0.9	823.78	934.47	979.57	919.69	954.1	876.74	907.03	928.66	862.27	874.92	750.13	764.3	672.32
201944_at						Yes, but >10% FDR	0.026271	2544.35	3258.94	14204.4	6.3	3416.04	3521.56	3104.19	3010.94	3329.29	3231.53	3590.58	3154.07	3338.54	3180.42	3178.21	3189.25	2503.97
201947_s_at	Yes	-103042	7702.09	40403.5	15.8701	Yes, but >10% FDR	0.0096805	6778.38	7721.25	18044.4	6.3	7756.67	7377.93	7723.29	7622.24	7590.61	8079.22	7590.61	7632.82	7675.26	7643.41	7891.04	7841.97	6728.18
201956_s_at	yes	3365.07	3647.52	34.0019	18.1743	Yes, and meet 10%FDR	0.0012985	3371.01	3647.52	24.373	6.3	3578.98	3730.1	3653.34	3712.05	3519.12	3691.52	3373.43	3301.72	3364.09	3456.27	3278.91	3359.43	3430.02
201966_at	Yes	3270.11	4038.86	13493.9	3.33671	Yes, but >10% FDR	0.012552	3365.18	4028.23	11444.4	6.3	4035.57	3888.51	4167.6	3880.43	3858.97	4308.59	4135.94	3986.76	3926.42	4208.24	4022.84	3832.31	3320.07
201971_s_at						Yes, but >10% FDR	0.028566	1143.27	1331.3	6104.37	1.2	1258.46	1311.5	1430.2	1346.5	1307.87	1361.52	1320.62	1369.09	1296.13	1330.73	1233.89	1250.25	1145.69
201986_at						Yes, but >10% FDR	0.029617	623.76	747.917	1544.37	0.6	746.79	725.08	807.32	711.64	732.15	760.08	758.5	701.35	672.32	740.83	658.94	654.39	643.14
201999_s_at	Yes	3664.91	4444.55	3214.52	0.833061	Yes, but >10% FDR	0.0032069	3684.31	4434.4	3044.37	0.9	4378.17	4255.17	4335.55	4529.07	4551.1	4589.11	4504.03	4258.12	4529.07	4036.81	4076.17	3964.71	3719.78
202003_s_at	Yes	1333.87	2170.62	14250.7	0.674775	Yes, but >10% FDR	0.0076899	1620.56	2169.76	4064.37	0.9	2118.75	2115.82	2205.67	2194.99	1975.5	2430.44	2184.37	2086.69	2132.01	1968.66	1983.73	1802.77	1645.15
202005_at	yes	94.7183	153.68	14147.7	-7.62094	Yes, and meet 10%FDR	1.6238e-05	93.306	149.289	14264.4	-6	94.19	100.64	95.41	105.13	91.77	93.12	91.2	92.28	94.35	92.35	91.46	98.63	153.49
202010_s_at						Yes, but >10% FDR	0.047949	418.35	484.27	91.615	6.3	467.41	458.57	470.48	526.39	458.57	447.58	524.21	424.61	452.88	410.43	428.16	405.34	393.99
202011_at						Yes, but >10% FDR	0.010314	1159.3	1639.74	3044.37	0.6	1664.39	1575.94	1704.34	1782.89	1508.61	1654.29	1614.64	1555.32	1397.86	1454.19	1498.18	1409.53	1146.48
202013_s_at						Yes, but >10% FDR	0.020149	489.893	603.083	127.564	0.3	590.86	602.58	577.63	620.38	541.57	553.72	568.49	520.59	538.57	524.94	560.67	517.35	482.37
202016_at						Yes, but >10% FDR	0.021265	1707.73	2098.41	2384.37	1.8	2032.13	2046.58	2213.33	1959.13	2196.51	2072.28	2225.63	1929.48	2169.28	1968.66	1908.2	1596.84	1814.05
202020_s_at						Yes, but >10% FDR	0.029846	2002.67	2567.34	7484.37	1.2	2497.8	2544.21	2888.29	2512.66	2628.46	2442.26	2650.41	2398.64	2442.26	2438.87	2471.21	2285.03	1985.11
202028_s_at	Yes	1586.8	2411.95	16439.8	-1.43971	Yes, but >10% FDR	0.0039448	1591.36	2150.49	9764.37	-2.4	1718.31	1538.17	1664.65	1603.49	1678.55	1390.13	1639.45	1466.34	1641.73	1512.79	1706.71	1847.04	2169.28
202031_s_at						Yes, but >10% FDR	0.045215	435.993	529.846	3044.37	6.3	547.95	554.1	499.04	538.57	533	477.71	587.73	470.81	551.03	548.75	470.81	448.2	422.56
202034_x_at						Yes, but >10% FDR	0.004533	375.803	449.976	2204.37	2.1	434.97	463.04	476.72	479.37	439.28	446.65	423.44	444.49	454.77	429.64	404.5	360.29	389.37
202038_at						Yes, but >10% FDR	0.012427	802.016	964.828	91.615	6.3	945.83	1048.42	964.74	945.54	838.11	1000.84	970.11	823.14	849.81	831.75	726.59	827.15	765.36
202040_s_at						Yes, but >10% FDR	0.033972	402.451	576.26	7304.37	1.2	589.45	634.29	502.51	583.67	548.37	648.97	605.51	524.21	581.65	578.83	500.07	506	398.1
202044_at						Yes, but >10% FDR	0.031492	68.536	73.933	47.254	2.4	73.69	72.5	75.17	77.65	71.51	72.35	72.25	68.83	64.98	69.26	71.95	69.45	67.18
202052_s_at	Yes	876.331	1870.6	868333	-0.296213	Yes, but >10% FDR	0.0019412	894.868	1183.5	2744.37	-0.6	904.44	846.87	871.89	920.33	900.14	902.64	893.3	987.75	1024	981.61	957.41	1137.78	1136.2
202058_s_at						Yes, but >10% FDR	0.027531	242.802	338.307	8804.37	2.1	335	388.56	348.5	295.09	329.01	316.71	352.87	340.38	320.02	347.53	320.68	287.62	243.37
202060_at						Yes, but >10% FDR	0.023868	260.228	332.27	11324.4	6.3	334.51	340.38	366.33	298.17	324.26	333.61	347.05	317.15	332.68	339.91	339.91	309.54	260.66
202061_s_at	Yes	1915.75	2136.38	302.918	1.41196	Yes, but >10% FDR	0.010233	1908.13	2132.03	344.367	1.5	2037.15	2115.82	2137.93	2269.25	2080.91	2184.37	2146.84	2019.8	2078.03	1900.28	1878.02	1941.56	1949.65
202066_at						Yes, but >10% FDR	0.029086	372.132	481.109	16244.4	6.3	498.27	490.12	487.07	475.07	520.59	469.18	485.73	454.14	472.77	490.8	423.73	476.72	373.51
202067_s_at	Yes	97.1658	177.197	18400.8	-0.524822	Yes, but >10% FDR	0.002299	100.272	138.127	2744.37	-6	100.4	95.47	99.73	87.67	104.55	96.67	99.46	104.33	119.26	92.54	129.34	130.42	141.73
202068_s_at	Yes	217.237	305.555	2169.83	-2.69174	Yes, but >10% FDR	0.0015562	216.045	308.868	2204.37	-2.4	237.85	235.08	197.95	211.72	201.83	214.82	236.06	194.28	224.88	232.16	280.33	330.84	281.89
202075_s_at						Yes, but >10% FDR	0.038318	76.922	81.868	704.367	6.3	82.23	80.45	80.06	81.57	84.68	78.58	81.86	82.48	85.45	76.37	77.55	74.44	78.96
202081_at	Yes	1270.85	1574.09	1059.11	-14.3157	Yes, but >10% FDR	0.015163	1287.21	1567.52	1004.37	-6	1316.25	1402.71	1315.14	1368.14	1068.23	1364.35	1222.82	1151.26	1228.77	1472.45	1508.61	1606.83	1606.83
202092_s_at	yes	1589.96	1832.69	576.56	0.838435	Yes, and meet 10%FDR	0.00079516	1592.44	1829.05	584.367	0.9	1837.96	1758.34	1819.09	1878.02	1834.28	1870.23	1835.55	1698.45	1773.03	1691.4	1604.6	1632.65	1591.31
202096_s_at	Yes	606.518	906.629	2054.42	0.312111	Yes, but >10% FDR	0.013373	643.168	905.344	944.367	0.3	874.85	919.69	907.65	954.76	791.8	837.53	831.17	800.08	766.42	826.57	797.86	650.32	712.13
202105_at						Yes, but >10% FDR	0.020655	1812.81	2117.64	247.319	1.5	2058.75	2222.55	1905.56	2281.87	2085.24	2105.58	2140.9	2026.82	1895.02	1956.42	1672.74	1862.47	1804.02
202106_at						Yes, but >10% FDR	0.049346	255.88	302.564	2.834	6.3	293.64	287.62	310.83	322.02	246.94	265.76	261.02	268.17	263.38	277.24	238.36	287.42	222.55
202107_s_at	Yes	811.256	1019.11	9904.76	13.6334	Yes, but >10% FDR	0.0036102	810.121	1023.86	9764.37	6.3	1040.46	1078.64	994.62	1080.89	1015.52	992.55	1014.81	956.09	992.55	1003.62	1040.46	908.28	811.25
202109_at						Yes, but >10% FDR	0.033533	714.964	815.732	5804.37	-6	755.99	716.09	671.85	697.48	758.5	733.68	721.57	715.6	664.44	715.1	681.7	844.53	788.52
202113_s_at	Yes	764.042	1212.98	8659.93	2.09191	Yes, but >10% FDR	0.0069214	776.74	1208.61	8564.37	2.4	1190.58	1179.53	1390.13	1057.91	1215.22	1155.26	1291.65	1207.66	1284.51	1137.78	1174.64	951.46	796.21
202114_at						Yes, but >10% FDR	0.021694	573.903	707.854	8264.37	6.3	689.78	709.67	802.86	668.14	660.31	694.1	724.08	685.97	716.09	725.08	721.07	604.67	566.92
202116_at						Yes, but >10% FDR	0.041964	463.806	598.663	8324.37	2.1	600.21	612.26	567.71	565.74	551.8	580.44	689.78	590.58	598.41	585.69	576.83	522.76	463.68
202120_x_at						Yes, but >10% FDR	0.026426	2348.43	2476.58	55.76	6	2446.97	2577.93	2415.32	2454.14	2512.66	2411.98	2452.44	2315.33	2382.07	2393.66	2310.52	2363.98	2324.98
202123_s_at						Yes, but >10% FDR	0.026356	299.824	338.921	28.76	6.3	341.8	341.56	306.13	343.46	359.04	346.33	300.66	306.77	282.09	303.38	325.16	302.33	277.43
202139_at						Yes, but >10% FDR	0.035573	223.834	334.419	17144.4	6.3	344.81	331.99	307.41	354.83	292.44	347.05	347.05	335.46	381.62	314.3	294.68	335	221.32
202145_at						Yes, but >10% FDR	0.01547	143.181	193.217	9044.37	6.3	196.49	218.58	196.45	194.96	184.69	200.58	198.78	179.27	181.77	178.28	203.38	160.45	145.01
202149_at						Yes, and meet 10%FDR	0.00044238	429.978	834.29	2744.37	0.6	805.4	872.49	850.99	896.4	821.43	718.58	743.4	759.02	741.34	755.35	631.66	547.61	463.68
202190_at						Yes, but >10% FDR	0.04249	276.294	375.31	10964.4	6	396.76	417.03	358.54	357.8	379.51	336.63	415.01	336.39	376.63	384.01	371.7	338.97	273.05
202192_s_at						Yes, but >10% FDR	0.013146	96.507	114.157	1964.37	-6	91.93	86.76	99.66	98.29	105.13	85.33	96.87	100.5	98.5	95.94	114.09	119.68	111.04
202201_at						Yes, but >10% FDR	0.020635	3822.31	4203.18	247.319	1.2	4209.21	4326.55	3970.21	4317.56	4036.81	4317.56	4255.17	3989.52	3986.76	3899.3	3942.79	3709.48	3869.68
202203_s_at	Yes	-71.7652	143.996	203900	0.699777	Yes, but >10% FDR	0.0054108	99.381	144.057	6764.37	1.2	137.09	158.46	145.61	131.78	150.64	137.57	137.66	148.78	145.61	141.14	124.67	124.41	98.7
202205_at	Yes	155.52	178.446	-5858.77	1	No		171.016	196.821	3.946	6.3	178.6	202.25	180.39	221.17	177.79	175.95	180.14	179.89	169.37	174.37	161.12	172.09	155.52
202228_s_at						Yes, but >10% FDR	0.032421	3238.27	4287.41	10604.4	6.3	4156.06	3940.05	4705.07	4193.68	4472.92	4062.07	4039.61	4050.82	4643.51	4124.49	4570.07	3856.3	3184.83
202237_at						Yes, but >10% FDR	0.005015	8722.83	9803.49	14204.4	6.3	9926.79	10002	10141.6	9721.75	9891.68	9601.21	9919.14	9469.02	9561.36	9843.8	9850.63	9701.55	8659.09
202250_s_at	Yes	-992.235	286.658	189720	1.5298	Yes, but >10% FDR	0.003536	219.124	286.429	12404.4	6.3	294.7	313.43	267.43	276.47	284.44	290.02	275.71	292.24	283.66	288.41	283.46	272.67	214.82
202252_at						Yes, but >10% FDR	0.036503	5528.57	6231.57	9284.37	2.1	6162.17	6334.43	6635.55	6148.42	6186.9	6144.16	6178.32	6264.57	5938.98	6042.79	6178.32	5869.41	5537.43
202261_at	Yes	744.641	938.174	1053.89	0.789045	Yes, but >10% FDR	0.010436	749.995	940.599	884.367	0.9	968.17	926.73	939.01	835.21	922.24	1036.14	944.23	891.44	858.69	835.21	817.46	783.61	741.86
202264_s_at						Yes, but >10% FDR	0.027486	451.051	588.047	13544.4	-6	454.32	434.44	517.71	501.46	449.13	438.98	423.73	434.74	468.53	427.57	469.18	469.83	588.54
202273_at	Yes	76.2918	93.18	10087.5	-17.2759	Yes, but >10% FDR	0.0051192	76.595	92.789	10244.4	-6	77.02	71.75	75.06	80.39	80.62	76.8	74.85	78.74	70.72	78.09	75.17	84.1	93.18
202278_s_at						Yes, but >10% FDR	0.018857	350.468	444.588	6764.37	5.7	432.9	438.67	452.88	449.76	487.07	441.42	426.68	414.15	474.74	400.59	442.95	359.79	357.3
202282_at						Yes, but >10% FDR	0.012954	3724.49	4151.24	47.254	5.7	4079	4138.81	4118.78	4090.33	4135.94	4344.58	3997.83	3615.55	3861.65	3605.54	3912.84	3427.64	3923.7
202299_s_at						Yes, but >10% FDR	0.041766	2026.31	2495.43	5444.37	6.3	2490.31	2626.63	2784.11	2382.07	2476.35	2569.02	2449.04	2154.29	2493.58	2415.32	2507.44	1975.5	2083.8
202300_at						Yes, but >10% FDR	0.029928	2808.61	3212.2	91.615	6.3	3165.02	2988.07	3378.11	3331.6	3136.63	3143.16	3380.45	2832.77	3093.45	2581.51	2944.89	2655.93	2848.53
202305_s_at						Yes, but >10% FDR	0.031757	1600.61	1723.77	7.651	6.3	1678.42	1725.74	1748.62	1707.89	1768.12	1545.65	1563.97	1640.59	1567.23	1584.71	1546.72	1644.01	1713.82
202329_at	Yes	256.531	314.225	2988.01	-14.7724	Yes, but >10% FDR	0.0065335	256.461	315.182	2624.37	-6	273.3	281.31	245.23	239.52	277.24	234.1	264.66	245.91	257.96	246.08	304.65	309.76	318.69
202332_at	yes	128.616	203.52	10124	-16.1636	Yes, and meet 10%FDR	0.00079555	129.474	202.921	10364.4	-6	130.2	137.47	127.56	133.16	130.33	148.36	128.62	130.33	106.67	127.2	114.88	162.35	203.52
202336_s_at	Yes	1583.94	1928.47	4743.63	5.40621	Yes, but >10% FDR	0.0073586	1562.6	1939.69	5144.37	3.9	1935.89	1875.42	2022.61	1909.53	1821.61	1957.78	2010.03	1824.14	2083.8	1843.2	1884.54	1588.01	1585.81
202338_at	yes	272.287	335.262	67.7909	2.0268	Yes, and meet 10%FDR	0.00056393	271.282	335.526	65.796	2.1	315.12	314.52	356.31	335.93	340.85	350.43	313	287.02	286.62	261.2	278.2	273.99	264.48
202347_s_at	Yes	1082.09	1192.22	37.3576	15.3892	Yes, but >10% FDR	0.0047736	1076.93	1192.22	33.937	6.3	1152.15	1217.75	1207.66	1156.06	1195.17	1224.52	1102.07	1064.53	1046.24	1133.05	1130.7	1057.18	1060.85
202351_at	Yes	825.937	1406.02	21353.7	0.909835	Yes, but >10% FDR	0.0058364	1063.66	1398.14	7844.37	1.8	1416.61	1361.52	1516.99	1344.64	1316.05	1433.18	1446.15	1395.92	1452.18	1282.73	1361.52	1199.32	1073.42
202358_s_at	Yes	387.889	641.07	12300.4	-0.54182	Yes, but >10% FDR	0.0095934	392.55	545.386	2144.37	-0.9	428.72	386.95	417.03	326.74	421.39	346.57	407.88	392.35	420.22	473.1	483.38	467.88	560.67
202359_s_at	Yes	-1407.63	137.841	255393	1.60587	Yes, but >10% FDR	0.00523	92.748	137.653	12824.4	6.3	130.93	124.67	147.54	143.61	128.62	135.49	145.51	143.71	148.67	129.16	136.05	129.97	89.57
202363_at						Yes, but >10% FDR	0.03521	67.925	72.797	4.657	6.3	71.32	69.99	72	77.33	70.33	66.86	68.03	69.36	66.67	68.59	67.28	66.17	69.5
202367_at						Yes, but >10% FDR	0.0091719	440.251	501.758	55.76	5.7	501	494.56	510.23	474.74	472.44	538.2	491.82	438.37	414.43	435.04	458.57	458.25	436.85
202382_s_at						Yes, but >10% FDR	0.014141	496.602	573.216	77.64	6.3	569.85	579.23	608.87	533.37	544.2	576.03	623.39	482.37	543.07	484.38	491.82	505.3	482.37
202386_s_at						Yes, but >10% FDR	0.020364	276.41	417.485	16004.4	6.3	448.17	446.03	441.42	428.75	393.17	410.43	445.41	413.57	348.01	409.58	386.15	413	276.09
202393_s_at	Yes	711.951	2.18049e+07	2.03481e+09	-1.01246	Yes, but >10% FDR	0.0015052	714.985	977.665	12104.4	-6	700.01	648.07	720.07	708.19	757.45	665.83	702.33	778.2	702.81	748.57	765.89	778.2	996.69
202397_at						Yes, but >10% FDR	0.034126	2141.06	2620.4	3764.37	0.6	2546.95	2597.67	2659.61	2698.61	2423.71	2759.13	2592.27	2698.61	2377.12	2569.02	2300.93	2405.3	2172.29
202413_s_at						Yes, but >10% FDR	0.041741	1729.85	2022.16	6404.37	6.3	2003.69	2089.58	2053.69	1929.48	2111.42	1972.76	1978.24	1831.74	1997.53	1964.57	2176.81	1691.4	1757.12
202416_at						Yes, but >10% FDR	0.041397	2088.37	2468.09	17684.4	6.3	2550.09	2387.03	2585.09	2283.45	2430.44	2401.97	2497.03	2408.63	2547.74	2365.62	2517.89	2495.3	2078.03
202417_at						Yes, but >10% FDR	0.04836	573.182	642.482	77.64	6.3	642.9	643.59	632.1	626.43	653.93	635.61	676.99	563	569.28	593.46	586.51	636.05	500.42
202421_at						Yes, but >10% FDR	0.010701	423.399	647.506	2144.37	0.3	636	657.11	623.83	648.07	591.81	631.66	598	545.34	557.18	556.41	540.44	580.44	413.86
202422_s_at						Yes, but >10% FDR	0.026583	70.68	89.586	11624.4	6.3	89.64	86.7	95.21	92.73	88.71	97.95	93.44	83.06	83.75	85.51	89.7	84.33	69.6
202431_s_at	Yes	2053.99	2715.5	9697.65	-28.6197	Yes, but >10% FDR	0.0018549	2056.66	2689.03	8444.37	-6	2090.55	2109.96	2010.03	2323.36	1983.73	2130.53	1993.38	2007.24	1857.31	2104.12	1983.73	2521.38	2715.5
202434_s_at	yes	107.983	210.702	191.184	-1.97405	Yes, and meet 10%FDR	3.8602e-05	107.65	207.229	177.621	-2.1	101.27	128	106.37	102.82	106.67	105.13	107.56	145.51	176.07	237.37	223.48	203.52	184.06
202435_s_at	yes	2293.31	5478.9	780.467	-0.532261	Yes, and meet 10%FDR	4.2468e-07	2321.05	5281.37	584.367	-0.6	2400.12	2307.32	2612.11	2073.71	2372.18	2599.47	2916.45	3222.58	3758.65	3712.05	4649.95	4734.51	5127.36
202436_s_at	yes	7437.22	14120.8	224.086	-0.764461	Yes, and meet 10%FDR	6.6154e-05	7568.06	13896.7	209.592	-0.9	7640.46	7685.91	7151.35	7595.87	6681.7	9442.81	8653.09	10155.7	10975.5	12546.5	13326.4	15586.4	12468.5
202437_s_at	yes	2071.95	5602.68	781.74	-0.53128	Yes, and meet 10%FDR	5.2504e-05	2107.21	5559.82	764.367	-0.6	2174.46	1867.64	2530.14	1965.94	2410.3	2250.45	2683.69	2793.77	4101.68	3550.98	4877.75	4323.55	5449.85
202444_s_at	Yes	569.755	870.782	8454.54	0.630103	Yes, but >10% FDR	0.0055738	658.4	858.788	4424.37	3.3	827.85	864.07	913.97	939.66	870.08	797.31	877.95	814.06	842.77	807.32	807.32	660.77	681.23
202447_at						Yes, but >10% FDR	0.021772	2189.5	2486.95	704.367	6.3	2493.38	2370.54	2523.13	2495.3	2328.2	2630.28	2469.49	2380.42	2661.46	2139.41	2318.54	2194.99	2056.54
202454_s_at						Yes, but >10% FDR	0.037701	410.643	741.101	4964.37	0.6	731.87	723.58	685.49	868.87	673.72	709.18	727.6	681.7	657.57	619.52	577.23	680.76	403.1
202475_at	Yes	4844.06	6237.35	9954.97	16.7071	Yes, but >10% FDR	0.0019612	4845.33	6226.81	9884.37	6.3	6288.74	6330.04	6521.55	5845.05	6338.83	6277.61	6467.53	5906.14	6148.42	5996.9	6489.99	5514.45	4844.06
202482_x_at	yes	105.059	891.917	38189.8	-10.7179	Yes, and meet 10%FDR	0.00065298	105.082	156.852	17684.4	-6	105.57	102.54	101.76	110.05	117.21	96.8	102.68	106.15	116	96.74	105.27	99.94	160.12
202494_at						Yes, but >10% FDR	0.015134	144.256	167.052	3.946	0.6	162.73	176.07	158.24	157.59	146.42	160.01	150.12	144.41	141.44	141.83	152.01	145.61	140.46
202501_at						Yes, but >10% FDR	0.038857	573.922	694.84	10664.4	2.7	688.99	678.87	687.4	699.9	738.27	661.68	665.83	653.48	755.35	721.07	669.53	645.38	567.71
202521_at	Yes	696.798	793.48	48.1517	14.3528	Yes, but >10% FDR	0.0077088	696.801	798.715	55.76	6.3	791.93	752.74	853.35	793.45	763.77	805.64	784.16	670.92	648.07	710.65	736.73	705.74	708.68
202546_at						Yes, but >10% FDR	0.021048	4819.28	5327.84	77.64	0.9	5194.13	5138.03	5552.8	5560.5	5308.17	4945.84	5213.37	5049.76	5091.94	4721.4	4754.24	4837.35	4874.37
202551_s_at	Yes	-1.10208e+06	522.986	65704.9	10.9264	Yes, but >10% FDR	0.013535	315.269	524.748	17804.4	6.3	548.07	523.12	544.58	576.83	482.04	532.26	563.39	551.8	446.96	520.95	453.2	532.63	313
202553_s_at						Yes, but >10% FDR	0.047226	896.493	1018.41	7664.37	6.3	1002.31	1024.71	1089.92	1009.9	991.18	1034.7	1010.6	944.89	1031.12	982.29	1038.29	915.24	904.51
202556_s_at						Yes, but >10% FDR	0.017866	168.441	191.05	4.657	6.3	187.76	190.94	182.91	204.36	179.64	169.48	164.62	165.42	167.73	178.77	180.39	165.31	153.49
202580_x_at						Yes, but >10% FDR	0.031335	292.087	372.082	5444.37	1.2	378.32	369.39	342.27	376.37	391.54	387.75	396.45	333.61	386.15	340.62	358.29	311.48	300.45
202583_s_at						Yes, but >10% FDR	0.047687	232.616	328.904	4724.37	0.6	350.95	314.3	314.74	323.58	313.65	349.22	372.22	306.55	295.7	277.24	306.34	293.05	230.72
202594_at	Yes	794.858	893.768	42.5148	0.914603	Yes, but >10% FDR	0.0034013	791.118	895.935	47.254	0.9	883.79	894.54	902.01	867.07	919.69	845.7	859.29	800.08	814.06	824.29	824.86	751.17	792.9
202609_at						Yes, but >10% FDR	0.0045981	2522.16	3133.37	6104.37	1.2	3191.21	2981.87	3336.22	3138.81	3191.46	3138.81	3063.57	3013.03	3091.3	3138.81	2817.11	2862.38	2528.38
202620_s_at						Yes, but >10% FDR	0.02771	4123.17	4558.62	2.834	6.3	4299.31	4698.55	4685.54	4637.08	4144.55	4252.22	4311.58	4184.97	4249.27	4161.82	4164.71	3774.32	3942.79
202623_at						Yes, and meet 10%FDR	0.00062341	697.692	882.239	47.254	0.9	822.83	957.41	862.27	867.67	833.48	843.36	816.89	735.2	703.79	750.13	704.28	672.32	685.02
202631_s_at	Yes	-50.8609	115.595	331071	0.564996	Yes, but >10% FDR	0.0095687	80.507	115.105	6764.37	1.5	109.9	120.59	118.93	127.29	102.25	113.22	119.68	105.49	113.61	109.06	108.84	92.22	82.25
202636_at						Yes, but >10% FDR	0.030698	1969.99	2789.5	1544.37	0.3	2770.63	3021.4	2599.47	2628.46	2597.67	2633.93	2615.73	2339.53	2398.64	2728.7	2460.95	2214.86	2018.41
202641_at						Yes, but >10% FDR	0.033533	751.631	944.958	9824.37	6.3	963.18	946.2	912.07	846.87	999.46	929.94	939.01	949.48	926.73	903.26	1030.41	842.19	760.08
202643_s_at						Yes, but >10% FDR	0.017665	66.909	78.285	764.367	-6	71.23	69.99	70.38	65.98	71.9	60.21	66.07	69.21	61.14	78.63	79.12	77.12	76.8
202649_x_at						Yes, but >10% FDR	0.032402	26634.1	27551.2	16604.4	6.3	27478.2	27650.2	27497.3	27345.2	27592.7	27421.1	27478.2	27919.8	27307.3	27288.4	27997.3	27554.5	26579
202653_s_at						Yes, but >10% FDR	0.033363	152.203	198.793	18164.4	6.3	200.02	215.42	216.17	184.82	178.03	198.36	202.39	195.09	200.16	204.36	191.34	201.55	151.9
202657_s_at						Yes, but >10% FDR	0.023484	178.37	211.688	5384.37	-0.9	177.39	181.65	171.49	187.53	184.69	173.16	167.38	174.01	192.81	179.15	196.86	191.87	211.72
202665_s_at	Yes	104.654	4976.82	544210	-1.58907	Yes, but >10% FDR	0.013256	104.287	153.351	13304.4	-6	99.41	98.77	103.39	96.6	100.71	93.77	102.54	112.28	130.15	109.14	107.49	111.74	153.17
202667_s_at						Yes, but >10% FDR	0.040672	293.412	380.784	65.796	6.3	359.18	393.17	329.93	422.85	367.6	434.74	374.29	287.62	295.5	283.46	324.26	359.54	239.69
202671_s_at						Yes, but >10% FDR	0.03401	1213.82	1694.89	4124.37	0.6	1741.23	1710.26	1627	1812.79	1628.13	1597.94	1856.02	1518.05	1627	1433.18	1509.65	1552.09	1205.99
202677_at						Yes, but >10% FDR	0.044701	800.858	1016.47	2324.37	0.9	1000.53	1024	1078.64	870.08	1039.01	1066.01	1080.89	938.36	1008.5	910.81	887.74	906.4	778.74
202688_at						Yes, but >10% FDR	0.035553	99.5	156.735	10244.4	1.5	151.76	152.11	163.03	139.49	164.28	150.23	179.15	150.33	154.24	175.1	128.98	141.53	98.77
202698_x_at	Yes	11584.9	12773.8	7749.27	6.01393	Yes, but >10% FDR	0.0017212	11589.6	12779.7	7484.37	5.4	13059.2	12989	12581.4	12391	12704	12926.1	12854.6	12434	12827.9	12971	12765.8	11795.9	11585.2
202699_s_at						Yes, but >10% FDR	0.025081	71.319	89.887	10784.4	-6	73.88	68.26	72.55	81.01	70.42	70.47	70.77	69.17	69.36	75.43	63.73	78.47	89.57
202706_s_at						Yes, but >10% FDR	0.020169	571.367	730.734	9464.37	6.3	714.66	711.64	720.57	688.35	728.1	781.44	739.8	673.25	705.74	752.21	803.41	636.93	575.63
202707_at	Yes	72.55	74.7855	-13737.3	1	No		75.305	78.105	4.657	6.3	75.82	74.34	80.5	81.23	76.64	74.54	75.69	72.55	76.85	75.17	75.64	77.6	74.91
202718_at						Yes, but >10% FDR	0.037854	134.976	164.602	20.655	6.3	151.72	189.23	159.79	173.89	142.42	163.26	135.39	134.83	130.78	139.01	125.19	134.27	149.71
202721_s_at						Yes, but >10% FDR	0.021352	814.359	983.496	404.367	0.6	949.48	1032.55	984.33	1039.73	886.51	999.46	972.13	866.47	879.78	924.8	861.67	855.72	782.53
202727_s_at						Yes, but >10% FDR	0.015641	704.795	994.946	9884.37	2.4	996.38	987.06	1054.25	1028.27	997.38	980.93	1105.9	877.95	971.45	898.27	980.93	852.17	713.61
202730_s_at						Yes, but >10% FDR	0.022987	216.396	326.715	2804.37	0.9	313.33	308.69	309.76	385.61	360.04	286.42	326.97	296.52	329.24	284.25	264.84	259.21	217.82
202733_at						Yes, but >10% FDR	0.010896	794.532	1124.6	5804.37	0.9	1122.02	1157.66	1129.92	1186.91	1036.86	1251.98	1122.11	995.31	1109.74	1088.41	982.29	970.11	792.9
202734_at						Yes, but >10% FDR	0.018394	279.553	337.707	404.367	2.7	343.88	320.9	306.77	380.83	348.25	335.23	310.83	340.85	312.13	285.23	278.2	273.05	290.02
202736_s_at	Yes	2731.75	3147.48	125.122	17.5563	Yes, but >10% FDR	0.0023487	2711.12	3140.84	127.564	6.3	3020	3220.35	3160.64	3267.56	3040.3	3156.26	3167.22	2963.32	2643.07	2702.35	2992.22	2652.25	2668.85
202738_s_at						Yes, but >10% FDR	0.023558	483.893	599.744	2204.37	6.3	590.49	577.23	610.99	631.66	605.09	630.35	605.93	492.51	625.99	613.53	487.75	509.17	468.21
202739_s_at						Yes, but >10% FDR	0.034555	159.518	240.191	20204.4	6.3	242.17	250.91	252.65	199.74	226.29	257.25	220.56	254.58	244.72	244.89	236.22	268.91	160.9
202743_at						Yes, but >10% FDR	0.047398	82.431	105.882	8684.37	4.2	104.66	113.69	101.76	102.32	100.92	97.21	104.55	103.82	119.51	116.16	105.57	90.7	83.63
202745_at						Yes, but >10% FDR	0.032185	247.694	325.611	6344.37	6.3	325.51	291.03	331.76	271.16	319.79	346.81	347.53	305.49	334.3	345.13	331.99	248.48	247.28
202761_s_at	Yes	253.283	365.756	108.687	0.572375	Yes, but >10% FDR	0.0097897	251.743	368.586	108.105	0.6	343.73	370.16	347.05	413.29	343.22	311.91	326.74	306.98	290.02	297.35	235.24	305.71	230.08
202763_at						Yes, but >10% FDR	0.048125	208.255	236.737	177.621	6.3	228.88	260.29	231.36	257.6	228.81	228.18	238.03	234.27	198.91	203.38	220.71	226.13	201.41
202765_s_at	Yes	71.0491	91.5204	10366.5	-10.6808	Yes, but >10% FDR	0.0083631	70.866	91.19	10544.4	-6	73.33	68.64	72.3	61.91	78.52	70.28	74.44	68.97	70.91	72.25	69.99	79.34	91.52
202769_at						Yes, but >10% FDR	0.021795	116.904	212.858	3044.37	0.6	194.01	252.83	212.31	225.97	182.28	202.25	212.01	211.28	176.8	176.19	157.15	181.77	114.64
202770_s_at						Yes, but >10% FDR	0.0022061	77.678	133.332	8144.37	1.2	134.73	133.9	129.7	132.97	150.23	125.02	126.33	134.27	123.9	129.43	114.01	113.69	75.17
202771_at	Yes	-23466.8	252.227	269835	2.60093	Yes, but >10% FDR	0.017237	178.836	254.153	14744.4	6.3	268.33	243.37	233.62	274.56	249.17	281.7	230.4	241.35	253.18	255.29	242.19	248.83	174.13
202772_at						Yes, but >10% FDR	0.009418	563.047	727.201	5624.37	0.9	751	727.6	743.92	726.59	710.65	730.63	791.26	645.38	716.09	698.44	678.4	625.56	575.23
202787_s_at						Yes, but >10% FDR	0.047542	186.959	210.523	65.796	1.8	200.58	200.99	219.49	201.69	227.86	211.13	197.13	201.97	173.89	193.88	180.77	179.77	196.31
202790_at						Yes, but >10% FDR	0.028195	695.199	878.945	1664.37	0.6	897.92	870.08	822	1011.3	819.73	872.49	895.78	812.94	851.58	788.52	776.58	734.19	711.64
202794_at	Yes	568.226	800.566	10239.1	-2.79053	Yes, but >10% FDR	0.0044239	563.231	789.53	9644.37	-3	578.65	640.03	523.12	609.3	499.73	586.51	573.64	537.08	596.76	534.85	581.24	680.29	789.61
202801_at	Yes	165.789	44334.1	3.38565e+07	-0.962009	Yes, but >10% FDR	0.0040468	165.351	214.107	11264.4	-6	169.05	171.37	154.45	146.93	166	173.89	174.73	168.31	167.85	168.55	173.65	181.4	217.22
202802_at						Yes, but >10% FDR	0.020635	254.501	310.631	3.946	6.3	283.5	352.14	280.92	328.33	267.43	239.69	250.04	235.4	250.04	261.92	257.78	277.43	255.47
202804_at						Yes, but >10% FDR	0.041964	1565.91	1755.5	6584.37	-6	1645.65	1533.91	1480.63	1639.45	1551.02	1629.26	1484.75	1506.52	1528.61	1633.78	1557.48	1744.99	1746.2
202814_s_at						Yes, but >10% FDR	0.01311	1233.3	1827.09	13304.4	6.3	1821.47	1754.69	1843.2	2149.82	1724.54	1905.56	1795.29	1920.15	1787.84	1852.17	1638.32	1741.36	1196.83
202820_at	Yes	-5438.39	741.21	41332.7	11.776	Yes, but >10% FDR	0.0048037	609.129	746.339	18164.4	6.3	753.2	764.3	762.19	732.15	703.79	750.13	735.2	747.02	753.78	726.09	701.84	764.83	602.58
202825_at	yes	279.359	341.28	296.756	1.02736	Yes, and meet 10%FDR	0.001047	280.426	342.972	247.319	1.2	354.12	323.58	324.03	340.85	348.74	359.29	327.87	326.97	295.09	302.75	285.63	287.62	268.73
202828_s_at	Yes	88.8773	504.089	41207.8	-8.37255	Yes, but >10% FDR	0.0071446	88.906	116.209	18464.4	-6	87.73	88.95	88.34	101.62	93.83	89.2	84.62	86.58	88.52	87.49	82.65	87	116.08
202836_s_at						Yes, but >10% FDR	0.021363	2542.02	3151.39	4484.37	0.6	3047.34	3231.53	3265.3	3080.61	3145.34	3211.43	3057.21	2944.89	3065.7	2797.65	3127.95	2776.4	2595.87
202839_s_at						Yes, but >10% FDR	0.02703	1705.33	1864.82	40.046	6.3	1907.03	1879.33	1834.28	1822.88	1790.32	1955.06	1769.35	1713.82	1685.55	1743.78	1787.84	1741.36	1578.13
202846_s_at						Yes, but >10% FDR	0.017381	1040.58	1260.39	1.239	6.3	1186.73	1349.3	1258.95	1086.14	1075.66	1087.65	1120.56	1049.87	1102.07	991.18	1112.05	982.97	911.44
202849_x_at						Yes, but >10% FDR	0.042064	119.88	167.404	16004.4	-6	118.67	129.97	96.4	122.28	140.46	104.26	110.66	131.6	114.09	124.16	118.19	121.85	168.55
202856_s_at						Yes, but >10% FDR	0.048508	112.488	140.527	344.367	2.7	133.71	137.85	144.61	152.32	119.35	137.47	158.13	130.06	128	106.74	100.78	124.67	118.44
202857_at						Yes, but >10% FDR	0.046911	5562.57	5964.31	77.64	6.3	5861.28	6017.71	6076.4	6204.07	5776.58	5796.64	6063.77	5568.22	5701	5278.82	5649.86	5400.96	5857.22
202859_x_at	Yes	159.021	5734.26	1.15881e+06	-1.31837	Yes, but >10% FDR	0.0046404	159.233	201.563	13004.4	-6	154.92	157.48	148.36	164.62	157.15	160.01	166.92	150.02	172.09	154.56	169.37	166.23	204.36
202861_at	Yes	81.9075	368.56	1.68619e+06	-0.673047	Yes, but >10% FDR	0.0025375	82.394	99.845	9764.37	-3.6	83.25	82.14	81.12	82.71	78.19	82.6	77.39	86.4	87.43	84.21	82.71	91.52	99.66
202868_s_at						Yes, but >10% FDR	0.037832	2945.25	3381.35	10964.4	6.3	3479.77	3324.68	3276.64	3432.4	3441.93	3213.66	3514.25	3224.81	3446.7	3347.81	3575.68	3224.81	2928.61
202873_at	yes	99.23	122.138	961.246	22.8775	Yes, and meet 10%FDR	0.00033428	98.284	122.871	764.367	6.3	116.73	118.03	126.06	118.93	125.8	119.68	126.76	118.36	128.89	100.01	104.69	96.8	96.2
202874_s_at						Yes, but >10% FDR	0.019122	1006.2	1206.28	6284.37	2.7	1174.64	1181.17	1239.03	1177.9	1112.82	1176.27	1189.38	1246.79	1182.81	1308.77	1163.29	1054.98	998.07
202899_s_at						Yes, but >10% FDR	0.013585	5846.16	6954.41	6644.37	6.3	6818.42	6700.25	7418.95	6888.62	7266.27	6686.34	6917.33	6658.59	6941.35	6677.07	7342.22	5849.1	5984.44
202907_s_at						Yes, but >10% FDR	0.042188	405.503	512.454	5804.37	1.2	512.04	472.44	530.42	543.07	541.57	451.32	537.08	508.82	507.41	479.7	487.75	443.26	410.72
202912_at	Yes	2045.16	6273.03	-55908.2	1	No	0.8808	2464.98	3514.08	0.754	-6	2459.62	2898.32	2045.16	6281.96	2355.8	2185.88	2912.41	4457.44	2741.98	3800.57	2390.34	3519.12	2545.97
202926_at						Yes, but >10% FDR	0.042692	248.395	284.931	77.64	6.3	278.78	286.03	273.05	292.04	257.42	296.93	316.27	236.06	263.75	265.03	242.53	251.08	239.52
202927_at						Yes, but >10% FDR	0.041033	457.522	593.537	18644.4	6.3	580.62	595.52	646.27	574.04	525.3	608.03	619.95	569.28	614.39	556.79	619.95	608.03	456.03
202928_s_at	Yes	72.6633	80.775	47.389	16.688	Yes, but >10% FDR	0.0094666	72.664	80.382	55.76	6.3	76.17	83.69	78.19	85.98	80.17	80.45	80.06	69.45	73.98	72.86	74.44	74.34	70.91
202929_s_at	yes	1143.85	1292.28	115.789	12.2412	Yes, and meet 10%FDR	0.00066033	1140.82	1286.79	108.105	5.7	1271.03	1274.75	1300.63	1243.34	1281.84	1371.94	1302.44	1190.21	1140.14	1167.33	1165.72	1140.93	1105.13
202935_s_at	Yes	149.368	229.401	140.749	0.514561	Yes, but >10% FDR	0.0019786	154.095	229.143	108.105	0.6	230.24	227.23	220.86	238.2	192.27	230.4	191.34	193.88	178.77	185.21	135.77	169.01	155.31
202936_s_at						Yes, but >10% FDR	0.030327	156.871	274.351	150.526	0.6	264.93	270.97	250.56	349.71	206.36	279.36	229.13	216.02	169.25	230.56	164.51	185.98	132.51
202938_x_at	yes	99.9962	1450.68	6.33287e+06	-0.693159	Yes, and meet 10%FDR	0.00091132	101.002	131.76	8684.37	-1.5	103.81	98.02	103.68	97.68	101.41	91.84	104.47	102.75	97.82	102.68	111.04	113.14	132.61
202942_at						Yes, but >10% FDR	0.034126	3130.21	3611.42	33.937	6.3	3488.9	3671.11	3630.62	3761.26	3097.74	3853.62	3263.04	3165.02	3040.3	3112.81	3195.89	3260.78	3019.3
202947_s_at						Yes, but >10% FDR	0.035942	93.908	119.7	16604.4	-6	89.53	90.95	95.8	87.06	97.48	84.39	92.35	103.54	94.81	87.61	104.55	94.62	119.84
202948_at						Yes, but >10% FDR	0.015425	669.695	907.445	13724.4	6.3	938.43	916.51	1052.06	874.31	877.34	944.89	934.47	896.4	884.67	862.27	864.67	881	650.77
202950_at						Yes, but >10% FDR	0.042998	4764.24	5094.51	65.796	6.3	5031.9	5345.1	5419.71	4850.78	5070.81	4990.61	5099	4640.29	4783.99	4760.84	4857.51	4692.04	4860.87
202959_at						Yes, but >10% FDR	0.015359	168.185	226.397	5504.37	0.9	227.18	219.03	217.97	235.4	232.16	219.79	235.4	203.94	238.86	201.83	204.08	202.67	166.69
202963_at						Yes, but >10% FDR	0.049045	377.709	583.797	7484.37	0.9	616.99	558.73	505.65	645.38	593.87	600.91	607.61	553.72	515.2	582.05	468.86	539.69	378.72
202964_s_at						Yes, but >10% FDR	0.037203	298.379	336.664	1784.37	6.3	329.55	352.14	357.8	328.78	325.84	313.43	338.73	346.33	325.16	339.91	286.62	294.88	314.74
202979_s_at	Yes	82.83	102.966	-15287.6	1	No		77.891	103.277	24584.4	6.3	110.12	106.37	98.7	102.75	90.76	102.32	100.5	100.01	104.91	112.67	83.75	135.39	82.83
202982_s_at						Yes, but >10% FDR	0.032294	668.49	967.561	3224.37	0.6	913.05	958.74	1009.2	987.06	827.15	1119	960.07	900.76	921.6	819.16	838.11	816.33	664.9
202985_s_at	Yes	719.057	958.102	12707.7	10.49	Yes, but >10% FDR	0.0074036	731.53	960.975	14204.4	6.3	977.31	955.43	897.02	942.93	888.98	1021.16	968.76	928.01	939.01	1014.81	1005.71	940.31	719.08
202993_at						Yes, but >10% FDR	0.017415	263.403	331.461	150.526	6.3	309.76	331.07	333.37	309.33	321.8	372.48	355.82	319.79	240.85	258.32	304.65	244.89	288.81
202996_at						Yes, but >10% FDR	0.028566	1693.74	2414.91	4964.37	0.6	2411.98	2517.89	2428.75	2297.74	2188.91	2603.07	2455.84	2286.62	2285.03	2187.4	1933.5	2272.4	1726.94
203013_at	Yes	695.885	904.637	4602.12	0.770127	Yes, but >10% FDR	0.0064744	721.602	904.351	3044.37	0.9	822	870.68	915.87	956.75	937.71	929.94	923.52	857.5	877.95	849.22	820.86	768.02	735.2
203022_at	Yes	468.462	697.245	11059.6	0.410325	Yes, but >10% FDR	0.014402	550.991	695.507	1304.37	0.6	662.19	692.66	699.9	732.66	680.76	711.64	685.97	632.53	598	688.83	594.28	602.16	549.89
203025_at	Yes	599.342	706.29	42.952	14.606	Yes, but >10% FDR	0.005181	598.07	710.458	47.254	5.1	727.71	712.13	679.82	737.76	643.59	736.73	668.6	590.58	592.22	610.14	595.1	651.22	556.79
203033_x_at	Yes	2479.03	2814.19	1039.98	18.1721	Yes, but >10% FDR	0.0036928	2475.56	2822.17	944.367	6.3	2793.77	2795.71	2801.53	2920.5	2749.59	2811.26	2789.9	2667	2998.45	2556.58	2526.63	2528.38	2382.07
203038_at	Yes	1159.08	1438.86	1137.48	0.700743	Yes, but >10% FDR	0.010149	1133.11	1445.5	1484.37	0.6	1499.69	1456.21	1325.21	1461.26	1353.05	1494.04	1449.16	1430.2	1263.32	1338.13	1221.13	1269.46	1148.07
203039_s_at						Yes, but >10% FDR	0.019716	1210.87	1405.92	127.564	1.2	1361.83	1397.86	1441.15	1393.02	1367.19	1474.49	1353.99	1273.87	1286.29	1273.87	1170.57	1108.97	1337.2
203041_s_at	yes	916.269	1118.4	532.091	0.994371	Yes, and meet 10%FDR	0.00082856	908.888	1115.02	644.367	0.9	1073.26	1095.98	1160.88	1133.05	1071.19	1154.46	1150.46	1035.42	1050.6	972.8	942.93	969.43	884.06
203052_at	Yes	75.725	48037.9	66863.1	-9.59843	Yes, but >10% FDR	0.0041819	75.98	96.289	17264.4	-6	76.28	75.11	73.72	79.01	80.78	74.39	68.12	73.57	77.87	74.7	80.45	74.7	97.61
203054_s_at	Yes	-347855	278.495	8.47331e+07	1.02048	Yes, but >10% FDR	0.017822	178.315	276.982	11444.4	6.3	284.68	310.19	261.56	312.13	295.7	260.84	257.6	240.18	273.24	286.42	261.92	247.45	173.16
203058_s_at						Yes, but >10% FDR	0.0041551	711.648	1056.07	5804.37	0.9	1028.35	1099.02	1087.65	1073.42	980.25	1044.79	1105.9	1009.9	950.14	1071.19	876.13	908.28	712.13
203060_s_at						Yes, but >10% FDR	0.0039756	845.218	1379.62	10904.4	6.3	1396.35	1439.15	1627	1381.48	1242.47	1399.8	1434.17	1352.11	1287.18	1320.62	1370.99	1181.17	822.57
203069_at	Yes	72.4675	154.429	4.93165e+06	-0.308483	Yes, but >10% FDR	0.017045	73.01	88.641	3224.37	-0.6	75.34	71.26	70.23	69.79	74.54	78.58	73.01	78.19	74.59	81.8	75.37	84.68	86.58
203083_at	yes	79.5944	430.481	283873	-1.04371	Yes, and meet 10%FDR	0.0013865	80.305	108.167	11744.4	-6	80.84	74.29	79.62	70.72	83.92	83.46	78.63	80.17	81.12	86.16	82.65	87.97	110.05
203095_at	Yes	1031.12	1461.7	9553.05	16.0974	Yes, but >10% FDR	0.0061047	1008.85	1467.94	9104.37	6.3	1453.63	1504.43	1586.9	1515.94	1423.28	1390.13	1442.14	1404.65	1337.2	1384.36	1636.05	1170.57	1031.12
203097_s_at						Yes, but >10% FDR	0.021638	444.184	651.15	11744.4	6.3	661.28	743.92	699.9	652.58	622.53	711.64	653.48	574.83	628.17	592.63	667.21	596.76	434.44
203100_s_at	Yes	232.65	273.002	-48112.6	1	No		238.49	254.277	20.655	-6	252.73	237.7	237.87	234.59	232.65	236.71	285.43	278.59	239.02	237.54	257.42	250.21	239.85
203103_s_at						Yes, but >10% FDR	0.047254	1133.63	1291.02	91.615	6.3	1278.29	1317.88	1233.04	1357.75	1169.76	1324.29	1332.57	1153.66	1137.78	1128.35	1221.13	1196	1016.22
203108_at						Yes, but >10% FDR	0.031179	3734.46	3999.31	177.621	6.3	3922.8	3959.22	4133.08	4156.06	4006.15	3950.99	3853.62	3986.76	3575.68	3595.56	3655.87	3848.29	3877.74
203114_at						Yes, but >10% FDR	0.031917	416.961	472.038	65.796	6.3	456.63	453.51	489.1	489.78	444.8	490.12	493.53	377.94	425.79	452.26	418.77	400.32	434.14
203119_at						Yes, and meet 10%FDR	0.0008716	555.191	811.849	14804.4	-6	551.29	578.43	500.42	530.06	554.1	540.07	506.7	560.67	578.03	567.71	634.29	574.04	827.72
203122_at						Yes, but >10% FDR	0.044275	830.799	953.919	4.657	5.1	913.05	1018.34	873.1	995.31	884.67	839.86	870.68	796.76	840.44	815.76	907.03	800.63	764.3
203126_at	Yes	448.938	794.338	7482.47	0.409351	Yes, but >10% FDR	0.0045116	608.329	778.628	824.367	6.3	782.89	792.35	786.33	851.58	701.84	783.61	769.62	704.28	791.26	627.29	644.93	642.25	561.44
203136_at	Yes	2022.8	2454.63	5610.14	4.27633	Yes, but >10% FDR	0.0081705	1998.96	2454.45	5984.37	3.6	2497.61	2498.77	2524.88	2370.54	2445.65	2516.15	2502.23	2302.52	2628.46	2255.14	2417	2053.69	2025.41
203137_at	yes	202.101	314.75	10727.5	9.2431	Yes, and meet 10%FDR	0.0010216	203.832	314.592	11024.4	6.3	327.19	312.78	322.91	299	320.02	273.99	317.37	311.05	331.3	329.93	316.71	276.09	202.11
203140_at						Yes, and meet 10%FDR	0.0010897	149.611	247.219	10004.4	6.3	258.1	282.28	247.11	249.69	246.25	233.94	231.84	256.36	237.54	228.02	247.79	198.64	148.16
203142_s_at	Yes	1022.95	1220.63	3729.55	15.4449	Yes, but >10% FDR	0.0023259	1035.18	1221.86	4304.37	6.3	1228.49	1278.29	1228.77	1210.18	1220.28	1186.91	1292.55	1136.2	1221.98	1202.65	1191.03	1016.93	1028.98
203149_at						Yes, but >10% FDR	0.0023157	225.649	293.836	91.615	0.6	285.12	318.69	267.8	299.62	269.85	266.69	279.36	252.83	255.82	235.73	236.39	225.82	228.81
203152_at	Yes	1668.85	1958.2	117.594	15.1999	Yes, but >10% FDR	0.0037121	1684.37	1946.94	108.105	6.3	1909.67	2017.01	1875.42	2076.59	1863.76	2004.46	1960.49	1762	1505.47	1679.71	1689.05	1765.67	1704.34
203161_s_at	Yes	85.69	99.6223	-50220.2	1	No		91.189	97.362	644.367	-6	93.39	92.6	93.12	92.48	91.58	85.69	89.57	97.34	87.12	103.04	95.8	101.48	89.39
203168_at	Yes	86.0393	4099.7	108188	-3.71197	Yes, but >10% FDR	0.0052497	85.271	118.68	16004.4	-6	83.34	79.73	84.16	81.23	87.31	79.01	82.14	93.44	86.52	96.27	93.57	86.34	120.09
203172_at	Yes	119.576	143.945	3732.92	-12.5046	Yes, but >10% FDR	0.0040011	119.078	143.107	4064.37	-6	122.98	123.04	114.8	113.38	116.08	117.3	120.84	123.64	114.72	128.98	124.33	150.23	137.66
203180_at	yes	226.06	462.013	660.192	-1.53316	Yes, and meet 10%FDR	0.0001574	225.143	456.522	644.367	-1.5	208.03	206.5	234.59	213.34	235.24	210.55	284.84	227.39	319.57	340.62	523.85	454.46	417.61
203181_x_at						Yes, but >10% FDR	0.0027941	774.037	929.266	55.76	3	903.19	919.05	848.63	1015.52	942.27	913.97	881.61	779.28	792.35	790.71	731.64	807.88	742.37
203189_s_at						Yes, but >10% FDR	0.046628	757.977	1069.24	3344.37	0.6	1085.22	1067.48	1050.6	1052.06	1074.91	1269.46	976.85	978.89	971.45	925.44	932.53	972.13	744.43
203190_at	yes	3032.41	3415.21	96.3091	5.32323	Yes, and meet 10%FDR	0.0012114	3028.91	3421.12	91.615	4.5	3421.84	3473.08	3322.38	3546.06	3189.25	3538.69	3411.05	3112.81	3042.41	2975.67	3069.95	3055.09	3019.3
203193_at						Yes, but >10% FDR	0.019209	147.266	191.997	10364.4	-2.4	154.06	152.01	137.09	148.47	145.71	171.85	137.28	137	146.12	142.22	152.54	167.85	189.89
203196_at	yes	492.073	892.481	17086.8	2.01036	Yes, and meet 10%FDR	0.0011416	604.95	888.814	11024.4	6.3	867.94	823.71	859.29	895.16	943.58	924.8	862.87	919.69	969.43	850.4	884.67	790.16	589.77
203197_s_at						Yes, but >10% FDR	0.026683	722.84	872.729	11624.4	5.7	854.73	835.21	885.29	919.69	862.27	944.23	865.27	832.32	887.13	869.47	821.43	828.29	714.6
203198_at	Yes	115.97	143.265	12687.5	6.62652	Yes, but >10% FDR	0.004011	116.817	144.374	12404.4	6.3	145.3	145.61	135.67	147.65	145.11	140.65	144.01	146.52	134.18	146.02	145.21	138.72	116
203199_s_at						Yes, but >10% FDR	0.019383	115.446	140.137	12704.4	-6	117.56	113.69	105.42	118.11	117.3	117.95	109.21	111.74	116.24	126.94	117.05	120.09	140.65
203204_s_at	Yes	171.34	216.184	4043.41	1.59177	Yes, but >10% FDR	0.0064261	171.792	216.838	3944.37	1.5	211.57	197.13	216.62	223.79	206.79	221.63	212.01	233.29	221.47	213.78	191.87	186.24	169.6
203212_s_at						Yes, but >10% FDR	0.015746	213.669	280.251	3.344	-6	235.55	206.79	238.69	168.55	273.42	255.11	248.48	283.66	309.12	278.78	289.62	299.21	276.47
203217_s_at	Yes	1832.43	2204.24	692.072	-1.36088	Yes, but >10% FDR	0.0019912	1838.64	2184.3	644.367	-1.5	1827.65	1930.82	1961.85	1865.05	1717.39	1736.54	1791.56	1836.83	2014.21	2000.3	2244.22	2139.41	2217.93
203219_s_at						Yes, but >10% FDR	0.021705	969.714	1193.8	24.373	0.6	1164.55	1316.05	1053.52	1162.49	1102.07	1123.67	1123.67	993.24	957.41	995.31	1044.07	998.76	920.96
203225_s_at						Yes, but >10% FDR	0.022856	1599.22	1853.86	1304.37	5.4	1779.05	1870.23	1956.42	1853.45	1835.55	1883.24	1980.98	1720.96	1829.2	1777.95	1592.41	1495.07	1731.73
203237_s_at	Yes	86.3662	547.883	79140.5	-3.30594	Yes, but >10% FDR	0.0062275	86.717	103.173	16244.4	-6	86.05	86.34	85.45	88.89	81.06	90.95	87.91	81.18	84.51	89.7	88.1	86.76	104.33
203239_s_at						Yes, but >10% FDR	0.044354	72.989	79.963	1064.37	6.3	78.82	75.79	78.58	80.95	76.69	79.62	86.4	83.63	82.65	76.11	73.26	73.72	71.36
203241_at						Yes, but >10% FDR	0.033552	155.188	201.371	4544.37	1.5	201.6	225.97	193.34	210.11	206.5	195.36	183.8	183.29	216.17	195.23	180.39	169.72	157.7
203250_at	Yes	-6322.82	560.224	41135.8	10.1595	Yes, but >10% FDR	0.0042424	308.081	555.258	17144.4	6.3	587.82	567.71	565.74	508.82	554.1	613.96	645.83	511.65	556.02	547.99	497.31	565.74	292.64
203256_at	Yes	89.7739	126.033	2453.19	-0.407521	Yes, but >10% FDR	0.012615	90.654	118.507	824.367	-0.6	94.91	85.15	89.08	88.59	98.7	89.33	96.87	98.98	107.49	101.97	98.16	124.76	112.91
203257_s_at						Yes, but >10% FDR	0.044116	1121.12	1374.54	1664.37	6.3	1376.17	1365.3	1513.84	1385.32	1311.5	1494.04	1389.16	1316.05	1237.32	1370.99	1008.5	1277.4	1116.68
203259_s_at	Yes	2938.94	3214.05	40.8162	1.46001	Yes, but >10% FDR	0.0022449	2950.59	3204.95	40.046	1.8	3160.64	3097.74	3331.6	3278.91	3187.04	3173.81	3059.33	3019.3	2892.3	2994.29	2953.07	2854.46	2990.15
203262_s_at						Yes, but >10% FDR	0.047949	780.064	903.431	65.796	4.5	947.29	914.6	819.73	962.74	841.02	926.73	892.06	790.71	735.71	751.69	762.19	898.27	752.74
203272_s_at	Yes	413.901	929.247	35270.2	-11.2738	Yes, but >10% FDR	0.0063933	414.265	480.308	18164.4	-6	422.52	393.17	421.68	419.35	429.35	410.43	425.5	422.85	414.72	411	394.53	401.71	485.39
203274_at						Yes, but >10% FDR	0.0014575	1839.77	2419.98	11684.4	6.3	2473.49	2537.16	2579.72	2336.28	2462.66	2427.07	2377.12	2250.45	2406.97	2435.5	2368.9	2264.54	1806.52
203282_at	Yes	649.913	1251.14	43736	0.504292	Yes, but >10% FDR	0.0052378	982.756	1245.44	2684.37	0.9	1208.87	1272.1	1245.92	1286.29	1147.28	1309.68	1278.29	1219.44	1176.27	1186.91	1057.18	1120.56	960.74
203298_s_at						Yes, but >10% FDR	0.031318	165.195	193.502	150.526	-6	176.61	168.55	160.67	162.47	160.56	152.75	178.9	171.61	200.99	173.28	216.47	184.95	203.09
203302_at						Yes, but >10% FDR	0.03286	157.751	187.675	3884.37	6.3	179.95	174.25	203.09	200.02	189.23	193.61	176.19	186.11	196.18	176.19	179.27	151.38	161.34
203304_at	yes	651.491	1294.58	3341.27	0.491124	Yes, and meet 10%FDR	0.00022654	752.651	1291.74	1544.37	0.6	1242.76	1384.36	1217.75	1334.42	1173.01	1370.99	1200.15	1180.35	1085.39	1096.74	970.11	890.83	810.69
203306_s_at						Yes, but >10% FDR	0.037225	130.666	163.817	15164.4	6.3	167.58	180.89	167.85	150.85	166.23	166	171.85	151.59	160.67	161.79	162.47	161.57	130.24
203307_at	Yes	93.7591	4449.58	62150.6	-6.68201	Yes, but >10% FDR	0.0099305	93.349	125.731	16604.4	-6	93.72	94.22	88.1	97.28	87	103.04	87.61	85.63	91.71	98.84	104.47	93.51	127.03
203336_s_at						Yes, but >10% FDR	0.010464	2000.26	2230.01	55.76	5.1	2215.88	2224.09	2248.89	2365.62	2073.71	2289.79	2179.83	1983.73	2022.61	1896.34	2055.11	1970.03	2095.39
203339_at	Yes	124.079	182.034	14010.8	8.60657	Yes, but >10% FDR	0.0014604	127.599	181.545	15344.4	6.3	190.44	182.78	166.8	186.88	181.02	175.7	178.4	170.9	191.74	185.85	191.87	179.02	124.16
203346_s_at						Yes, but >10% FDR	0.040864	226.068	302.383	20384.4	6.3	323.88	299.41	278.98	316.49	310.19	308.47	305.92	260.11	307.62	298.59	301.08	318.25	229.92
203348_s_at						Yes, but >10% FDR	0.04568	99.103	161.074	19964.4	6.3	161.21	165.88	179.64	144.41	148.47	161.12	165.08	173.53	126.68	171.14	160.9	169.84	102.11
203352_at						Yes, but >10% FDR	0.012742	86.459	100.159	10.654	6.3	91.6	104.55	101.41	95.87	102.75	88.34	85.09	92.54	91.9	83.06	86.52	83.11	82.48
203360_s_at	Yes	331.43	394.851	339.623	11.5149	Yes, but >10% FDR	0.0035057	334.072	397.048	291.836	5.4	368.17	386.41	387.22	371.7	399.49	417.32	428.46	400.04	348.5	336.39	342.98	318.25	328.1
203386_at						Yes, but >10% FDR	0.036587	121.354	140.729	2.834	6.3	135.39	140.36	131.69	155.96	111.28	123.3	120.59	111.28	122.62	133.25	124.07	117.7	122.02
203401_at						Yes, but >10% FDR	0.034712	442.84	546.27	6584.37	1.2	524.73	532.63	583.26	546.47	552.95	554.48	559.89	487.41	565.35	513.78	528.95	478.04	452.57
203406_at						Yes, but >10% FDR	0.029813	835.193	1022.4	3884.37	6.3	1010.37	957.41	1093.7	983.65	1022.58	1122.89	1000.15	960.74	1000.84	1000.15	972.13	770.69	897.02
203424_s_at						Yes, but >10% FDR	0.031006	67.866	75.349	1064.37	6.3	73.43	76.64	74.34	76.8	75.11	71.01	70.42	77.87	79.56	71.41	68.12	66.3	68.59
203438_at	yes	204.212	788.916	29219.4	-0.594575	Yes, and meet 10%FDR	0.00049433	206.443	523.379	4484.37	-0.9	188.6	203.52	182.66	304.23	197.68	155.96	217.82	229.76	239.02	259.57	379.51	370.93	507.76
203445_s_at	yes	884.623	1155.2	1018.76	0.605008	Yes, and meet 10%FDR	0.0005739	880.701	1153.12	1124.37	0.6	1144.54	1177.9	1060.11	1176.27	1173.01	1181.99	1142.52	1062.32	1024	1041.9	973.47	962.74	894.54
203449_s_at						Yes, but >10% FDR	0.0069242	132.279	170.364	4724.37	6.3	165.59	171.97	158.46	169.48	189.49	169.37	174.61	168.31	183.55	154.34	167.38	125.89	134.27
203478_at						Yes, but >10% FDR	0.040672	3244.66	3637.03	6104.37	6.3	3751.71	3712.05	3856.3	3623.08	3546.06	3598.05	3658.41	3580.64	3528.89	3385.14	3769.09	3173.81	3306.3
203480_s_at	Yes	362.029	-3632.64	-1.49772e+06	-1	No		429.003	441.129	3.344	-6	443.36	461.44	432.93	362.29	442.34	463.36	423.73	460.48	461.12	418.48	436.55	438.37	437.46
203484_at	Yes	4734.51	6292.61	9900.56	17.3787	Yes, but >10% FDR	0.016246	4738	6240.06	9824.37	6.3	6168.82	6105.95	7131.55	5926.65	6139.9	5967.87	6144.16	6382.92	6621.76	6030.24	6598.85	5446.07	4734.51
203489_at						Yes, but >10% FDR	0.0062421	375.33	443.106	40.046	6	419.35	446.96	405.34	487.75	439.28	455.72	409.58	374.81	388.02	369.65	390.72	371.96	356.81
203499_at	yes	307.14	507.866	11625.5	-1.78929	Yes, and meet 10%FDR	5.3347e-05	309.021	477.941	9764.37	-3	308.09	340.14	288.61	303.17	313.65	296.93	305.28	296.52	290.02	340.14	317.37	395.9	476.39
203504_s_at						Yes, but >10% FDR	0.045133	245.613	362.632	3584.37	0.6	351.22	370.93	373.25	428.46	337.09	313.43	355.33	321.35	357.8	352.38	286.22	300.87	250.04
203512_at						Yes, but >10% FDR	0.044674	550.268	638.538	127.564	6.3	610.8	625.12	601.32	704.77	595.52	644.93	641.36	596.34	529.69	556.79	604.25	533.74	553.33
203515_s_at						Yes, but >10% FDR	0.018431	513.737	676.661	17144.4	6.3	665.21	698.44	693.62	702.33	638.7	706.72	710.65	669.06	596.76	649.87	665.83	677.46	512.71
203530_s_at	Yes	1167.61	1405.09	113.03	15.1231	Yes, but >10% FDR	0.01507	1172.35	1408.91	91.615	5.7	1380.52	1431.19	1438.15	1541.37	1242.47	1357.75	1444.15	1216.9	1036.14	1140.14	1263.32	1241.61	1156.86
203531_at						Yes, but >10% FDR	0.031179	473.723	556.836	12.571	0.9	548.49	549.13	576.03	531.9	521.31	524.21	514.49	441.11	507.76	463.36	522.76	485.39	430.24
203543_s_at						Yes, but >10% FDR	0.033533	58.689	67.04	5864.37	6.3	66.82	65.89	66.53	72	64.22	65.57	63.6	68.17	67.79	66.26	70.28	56.03	61.14
203545_at						Yes, but >10% FDR	0.034359	2658.88	3049.92	8984.37	4.5	3086.55	3209.2	3211.43	3046.63	3143.16	2809.31	3052.97	3050.86	2951.02	3063.57	3044.52	2809.31	2654.09
203547_at	Yes	85.7266	396.852	43926.7	-5.20604	Yes, but >10% FDR	0.0024545	85.612	121.459	16364.4	-6	84.83	82.77	80.84	76.64	82.83	81.46	87.91	93.57	96.67	90.26	85.21	85.87	123.3
203565_s_at						Yes, but >10% FDR	0.028675	275.104	352.391	3764.37	0.6	341.25	357.3	381.89	351.41	341.8	352.87	357.05	319.13	322.91	331.99	342.75	281.7	297.35
203566_s_at	Yes	-94795.2	226.922	5.21736e+07	0.951678	Yes, but >10% FDR	0.011442	151.331	223.958	11564.4	6.3	225.78	239.85	218.73	213.63	235.89	202.53	252.65	234.43	233.45	201.27	220.25	203.09	147.85
203572_s_at	Yes	-2471.18	389.898	88846.3	2.98897	Yes, but >10% FDR	0.0027515	287.493	391.04	15584.4	6.3	398.72	393.44	388.29	390.18	371.44	356.81	395.35	399.76	419.64	401.15	372.73	386.95	282.48
203581_at	Yes	-16.844	543.965	463150	0.371331	Yes, but >10% FDR	0.01269	389.381	541.458	2324.37	0.6	549.17	524.21	555.25	516.63	494.22	596.76	572.05	481.37	507.06	469.83	460.48	462.08	385.61
203582_s_at						Yes, but >10% FDR	0.036419	716.917	881.716	1304.37	0.9	829.38	817.46	884.06	960.74	882.83	907.03	920.96	814.63	875.52	777.66	747.02	814.63	682.18
203583_at	Yes	724.357	938.664	2431.81	0.550613	Yes, but >10% FDR	0.010381	739.116	938.72	1784.37	0.6	890.07	942.27	956.09	918.41	972.13	961.4	927.37	844.53	893.92	827.15	895.78	737.24	780.9
203588_s_at						Yes, but >10% FDR	0.015936	299.74	393.645	3524.37	0.9	376.45	447.58	400.59	383.21	359.54	384.28	401.99	395.9	369.65	382.68	342.98	325.61	309.76
203593_at						Yes, but >10% FDR	0.02133	878.911	1016.97	77.64	0.9	986.61	998.76	1112.05	928.66	1039.01	1010.6	954.76	918.41	906.4	897.02	938.36	849.22	849.22
203596_s_at						Yes, but >10% FDR	0.030835	108.935	169.281	12944.4	6.3	162.37	191.87	172.57	162.35	170.43	206.64	169.25	153.81	162.35	154.66	172.09	159.79	104.76
203598_s_at						Yes, but >10% FDR	0.044916	112.15	132.453	16604.4	-6	105.64	104.69	115.12	111.2	117.38	116.32	121.35	104.84	112.36	110.28	109.9	112.6	132.79
203606_at						Yes, but >10% FDR	0.0029494	2583.11	3323.58	11624.4	6.3	3444.31	3485.14	3364.09	3392.19	3276.64	3160.64	3494.81	3285.73	3169.41	3178.21	3202.54	3114.96	2530.14
203613_s_at						Yes, but >10% FDR	0.023071	3552.62	4060.83	3764.37	0.9	4025.01	3910.13	4284.76	3915.55	3888.51	4107.37	4173.38	4042.41	3978.48	3891.2	3834.97	3766.48	3543.6
203614_at	Yes	141.621	207.918	12107.1	9.86618	Yes, but >10% FDR	0.0028866	145.744	209.104	13004.4	6.3	204.05	209.38	211.72	209.09	194.69	191.21	223.79	201.97	205.36	209.24	226.6	199.19	141.63
203617_x_at						Yes, but >10% FDR	0.006562	251.559	413.769	8804.37	-1.2	251.82	250.73	238.36	216.77	260.84	204.08	256	305.49	267.61	255.11	310.4	304.02	417.61
203627_at	Yes	121.777	173.682	11629.2	8.09949	Yes, but >10% FDR	0.010034	121.385	174.119	12164.4	6.3	168.4	176.44	184.82	168.66	176.44	171.61	180.52	175.58	146.63	180.02	181.4	162.13	121.77
203633_at						Yes, but >10% FDR	0.0035372	2149.45	2639.08	15824.4	6.3	2690.93	2630.28	2585.09	2678.11	2799.59	2510.92	2687.41	2551.27	2730.6	2672.55	2551.27	2624.81	2117.29
203642_s_at	Yes	15.436	118.03	107982	0.63051	Yes, but >10% FDR	0.0075651	88.662	116.544	6764.37	3.6	115.95	119.76	111.59	131.69	121.1	108.61	121.18	112.05	109.29	115.36	114.48	94.22	87.43
203676_at	yes	305.634	571.012	22374.1	0.447098	Yes, and meet 10%FDR	0.0011578	414.529	573.805	2144.37	0.6	541.78	573.24	590.58	577.63	558.73	543.83	598.83	529.32	538.2	496.96	482.71	491.48	417.61
203680_at						Yes, but >10% FDR	0.047513	67.397	77.497	10064.4	6.3	77.24	79.51	78.74	74.34	78.03	75.79	78.68	72.71	74.23	81.74	80.95	72.5	67.28
203699_s_at						Yes, but >10% FDR	0.037788	75.377	83.573	108.105	6	78.37	76.16	83.92	86.04	84.98	86.82	88.71	78.58	72.66	75.43	74.13	76.64	77.23
203709_at						Yes, but >10% FDR	0.048478	294.752	344.777	33.937	6.3	329.47	354.34	339.67	358.29	297.76	374.55	304.44	290.42	309.97	275.14	312.35	302.75	258.5
203719_at						Yes, but >10% FDR	0.046684	398.588	420.397	2.834	6.3	432.9	409.86	413.57	423.44	397	384.28	400.32	398.38	389.91	397.83	398.38	408.45	413.57
203720_s_at						Yes, but >10% FDR	0.021828	636.853	758.38	40.046	0.6	721.18	737.76	783.07	799.53	710.65	677.46	715.6	666.75	671.85	671.39	688.35	578.03	639.15
203725_at						Yes, but >10% FDR	0.030664	832.791	930.032	704.367	6.3	909.61	915.87	972.13	906.4	913.33	875.52	955.43	890.83	988.43	806.76	880.39	815.76	812.94
203726_s_at						Yes, but >10% FDR	0.026669	93.747	117.122	15164.4	5.4	118.47	115.6	114.56	116.97	125.71	120.18	114.48	118.36	103.97	120.01	118.52	114.88	94.29
203728_at	Yes	81.0757	2569.25	564507	-1.35724	Yes, but >10% FDR	0.0065697	80.663	124.185	12464.4	-6	82.27	69.36	83.46	75.9	94.81	70.42	88.22	75.11	90.64	78.74	87.49	89.76	127.03
203739_at						Yes, but >10% FDR	0.0065283	315.846	488.663	5504.37	0.6	481.37	491.82	539.32	486.06	464.97	470.81	495.59	485.05	448.51	429.94	410.15	444.49	310.19
203741_s_at						Yes, but >10% FDR	0.036377	99.883	115.512	5804.37	6.3	117.57	119.18	116.24	106.89	119.93	109.82	114.88	109.52	113.69	121.6	118.93	96.07	103.68
203743_s_at	Yes	737.089	960.831	10582.9	-1.31824	Yes, but >10% FDR	0.013062	737.14	918.357	6944.37	-1.5	767.43	751.17	752.21	787.97	676.53	700.38	771.22	756.92	680.29	716.09	814.06	828.87	919.69
203744_at						Yes, but >10% FDR	0.0076679	1083.99	1387.07	11324.4	6.3	1359.63	1443.14	1432.18	1343.7	1436.16	1428.22	1522.26	1343.7	1373.84	1306.96	1346.5	1292.55	1065.27
203746_s_at	Yes	1364.35	1814.87	9754.07	16.2733	Yes, but >10% FDR	0.0039046	1356.17	1814.84	9464.37	6.3	1780.55	1802.77	1748.62	1791.56	1963.21	1856.02	1845.76	1732.93	1746.2	1724.54	1971.39	1544.58	1364.35
203747_at						Yes, but >10% FDR	0.020017	264.543	352.196	9404.37	-3.9	261.62	301.29	243.88	240.85	280.92	223.63	277.63	252.65	266.69	274.75	264.84	313.86	349.46
203761_at	Yes	91.5798	119.024	205.886	-1.07135	Yes, but >10% FDR	0.0069631	91.599	118.124	209.592	-1.2	93.87	89.26	91.77	85.15	97.68	92.86	96.67	104.11	104.47	112.05	137.85	111.28	111.74
203774_at	Yes	206.67	257.608	51.9583	1.47956	Yes, but >10% FDR	0.0034353	204.639	257.026	55.76	1.5	250.08	282.28	231.52	264.84	260.47	247.79	236.71	220.86	203.66	199.33	221.94	216.77	192.4
203776_at						Yes, but >10% FDR	0.038857	533.29	652.808	108.105	0.9	621	649.42	625.56	749.61	600.08	630.78	640.48	568.89	586.1	537.83	493.19	598	508.82
203779_s_at						Yes, but >10% FDR	0.022341	75.535	85.675	9.029	-2.4	79.6	78.47	79.29	67	78.3	82.2	86.04	88.16	85.09	84.51	83.06	89.08	85.21
203792_x_at	Yes	82.8522	828.169	51126.6	-6.16541	Yes, but >10% FDR	0.0029958	82.51	108.043	16304.4	-6	85.31	80.11	78.47	83.11	80.9	84.33	84.62	89.51	75.32	80.95	89.02	82.6	109.59
203795_s_at	Yes	113.371	143.961	4078.75	-10.6299	Yes, but >10% FDR	0.0046625	113.147	142.435	4604.37	-6	106.21	109.82	107.41	106.08	126.59	115.52	106.6	116.32	124.76	114.4	116.57	144.51	143.41
203800_s_at						Yes, but >10% FDR	0.013667	985.419	1186.13	8024.37	6.3	1197.47	1207.66	1267.7	1154.46	1251.12	1173.01	1205.99	1115.13	1175.45	1102.07	1233.89	1024	986.38
203817_at	Yes	63.1896	82.2222	4982.43	-0.691898	Yes, but >10% FDR	0.0093778	63.186	78.249	2144.37	-0.9	65.76	62.86	68.03	63.56	62.86	55.87	61.78	67.14	65.16	69.12	73.72	70.96	79.67
203818_s_at	Yes	655.377	749.202	420.366	15.1965	Yes, but >10% FDR	0.012093	649.734	750.841	524.367	6	730.97	790.16	739.29	738.27	744.95	814.06	687.87	748.05	737.24	642.7	671.39	654.39	653.03
203824_at	Yes	1028.64	1388.88	3241.28	0.655512	Yes, but >10% FDR	0.0056597	1054.45	1392.89	2384.37	0.6	1392.38	1363.41	1484.75	1315.14	1299.73	1412.47	1459.24	1357.75	1228.77	1298.83	1245.06	1105.9	1108.97
203827_at						Yes, but >10% FDR	0.044621	151.021	171.816	77.64	6.3	163.79	169.95	174.37	162.69	177.79	169.84	189.36	150.33	167.27	149.71	152.64	154.34	136.43
203843_at	yes	2129.85	2505.91	3440.67	15.1606	Yes, and meet 10%FDR	0.0013422	2153.96	2513.85	3524.37	6.3	2474.63	2516.15	2604.88	2469.49	2457.54	2533.65	2398.64	2579.72	2408.63	2615.73	2362.34	2114.35	2145.35
203851_at	Yes	1965.86	2192.51	92.0465	2.60825	Yes, but >10% FDR	0.0080096	1979.45	2198.84	77.64	2.4	2200.07	2307.32	2124.64	2184.37	2129.06	2217.93	2154.29	2048	1926.81	2004.46	1965.94	2089.58	1841.93
203852_s_at						Yes, but >10% FDR	0.035614	237.328	287.017	12704.4	-6	226.13	214.67	229.6	243.88	250.56	249.17	232.49	245.4	228.81	222.86	256	246.94	289.82
203878_s_at	Yes	86.5057	180.01	34809.7	-7.1869	Yes, but >10% FDR	0.0018705	86.479	108.715	16244.4	-6	89.36	90.64	87.79	89.26	82.08	84.51	90.7	86.16	87.61	80.11	83.34	86.52	110.43
203884_s_at						Yes, but >10% FDR	0.033685	125.166	158.646	15164.4	6.3	150.71	169.48	165.19	157.04	160.01	155.09	162.02	151.59	143.01	170.9	162.47	156.61	124.59
203909_at						Yes, but >10% FDR	0.017673	538.875	674.306	6764.37	4.2	673.93	676.99	660.77	633.41	669.06	653.93	674.18	645.38	769.62	645.38	669.06	560.28	537.08
203918_at	Yes	185.549	3440.35	54823.4	-5.63587	Yes, but >10% FDR	0.0030371	184.747	287.459	16604.4	-6	189.07	172.33	203.09	183.93	179.89	225.19	176.44	187.92	165.54	190.41	167.15	185.85	290.82
203935_at						Yes, but >10% FDR	0.038163	229.097	279.044	13964.4	6.3	294.66	290.82	271.54	259.93	284.25	299.83	280.33	265.4	286.82	264.84	273.99	273.8	226.91
203942_s_at						Yes, but >10% FDR	0.024699	87.057	104.695	6584.37	-6	92.95	86.16	91.58	91.27	86.4	80.11	90.07	91.33	81.46	90.38	80.5	105.05	101.97
203947_at						Yes, and meet 10%FDR	0.00072006	976.94	1510.51	14564.4	-6	968.09	914.6	977.53	879.78	1002.93	964.74	999.46	910.81	964.07	936.41	1164.91	1023.29	1534.98
203952_at	Yes	-85182.4	364.63	6.78136e+07	0.920452	Yes, but >10% FDR	0.020128	296.173	363.992	12164.4	6	359.65	346.09	358.29	394.26	362.79	352.63	372.48	372.48	361.04	372.73	336.39	348.01	293.46
203961_at						Yes, but >10% FDR	0.026669	605.433	781.924	3644.37	6.3	783.01	895.78	727.6	788.52	801.75	716.09	841.02	699.9	780.36	750.13	718.58	569.28	624.26
203962_s_at						Yes, but >10% FDR	0.045106	519.859	766.126	1664.37	0.6	747.88	815.76	883.45	728.61	662.14	669.99	832.9	677.93	658.48	728.61	601.32	595.1	529.69
203964_at	Yes	818.171	913.309	69.9097	105.165	Yes, but >10% FDR	0.0077596	817.369	919.268	77.64	6.3	896.33	879.17	929.3	905.14	890.21	917.78	976.85	812.37	855.72	772.83	849.22	806.76	807.32
203973_s_at	Yes	-1152.08	127.393	167278	2.13158	Yes, but >10% FDR	0.0097476	96.938	126.753	15164.4	6.3	126.25	133.34	135.11	128.89	116.73	134.36	133.16	123.38	120.18	126.24	122.45	125.19	95.34
203977_at						Yes, but >10% FDR	0.04489	114.217	153.265	464.367	0.3	146.6	165.31	134.36	157.37	146.52	140.26	133.16	142.42	135.67	132.7	120.84	136.33	116.65
203991_s_at						Yes, but >10% FDR	0.01634	67.852	75.091	209.592	6.3	74.16	75.64	79.29	72.76	73.57	74.23	73.62	79.34	64.85	68.21	71.9	68.74	67.14
203996_s_at						Yes, but >10% FDR	0.019334	97.565	128.296	9764.37	-6	101.73	92.54	100.78	109.74	109.52	88.95	96.8	90.7	94.22	101.06	92.28	114.17	127.47
204009_s_at						Yes, but >10% FDR	0.011952	590.602	846.18	6344.37	1.2	849.75	801.75	968.09	877.95	808.44	863.47	759.02	844.53	871.89	765.89	787.97	696.51	591.81
204014_at						Yes, but >10% FDR	0.02952	3278.27	4184.17	5624.37	-6	3558.37	3389.84	3615.55	3084.88	2778.33	3660.94	2963.32	3138.81	3082.75	3509.38	3121.45	4399.12	4050.82
204016_at	Yes	123.64	173.07	5639.81	0.705645	Yes, but >10% FDR	0.0047403	130.254	172.285	3764.37	0.9	164.9	165.42	171.73	178.16	176.44	180.27	180.52	166.92	153.38	172.09	148.06	145.82	134.46
204031_s_at						Yes, but >10% FDR	0.02202	4483.31	5002.85	108.105	6.3	5051.71	4810.6	5300.82	4894.68	4718.13	5249.63	5134.47	4611.43	4507.15	4627.44	4724.68	4302.62	4133.08
204032_at						Yes, and meet 10%FDR	9.4088e-05	192.668	345.105	12464.4	-6	189.99	186.63	183.93	182.66	216.02	174.73	191.74	181.52	191.61	223.02	215.57	224.72	355.33
204039_at						Yes, but >10% FDR	0.039129	139.995	193.516	12464.4	6.3	193.88	226.13	175.1	202.39	192	195.9	192.67	177.66	185.08	204.79	182.15	182.53	136.81
204078_at						Yes, but >10% FDR	0.022457	165.182	196.189	65.796	6.3	198.21	198.5	170.19	209.09	194.42	196.45	204.93	154.02	177.42	177.66	163.82	171.61	154.02
204079_at						Yes, but >10% FDR	0.029552	83.406	100.228	4664.37	-1.8	84.03	86.88	78.14	73.93	81.69	82.88	85.75	93.31	80.39	81.74	90.89	95.8	100.36
204100_at	Yes	69.9339	86.6487	11335.4	-6.46749	Yes, but >10% FDR	0.0077025	70.148	85.71	11384.4	-6	72.22	72.55	70.57	74.08	71.56	71.26	70.62	63.25	68.21	65.3	69.65	75.01	86.64
204107_at	Yes	77.9697	102.772	8934.55	1.66002	Yes, but >10% FDR	0.0082079	80.345	103.516	7124.37	1.8	100.33	97.95	106.3	101.83	100.64	101.9	101.34	98.77	113.54	106.45	95.8	90.32	80.5
204125_at						Yes, but >10% FDR	0.04694	300.062	342.834	5.495	6.3	337.22	343.7	348.01	345.13	334.53	287.42	287.62	313.43	336.39	270.41	330.16	296.11	282.09
204133_at						Yes, but >10% FDR	0.041178	92.77	124.254	12944.4	-6	87.49	84.62	83.81	100.15	95.54	81.63	103.61	90.7	104.18	101.06	95.27	98.29	125.98
204134_at	Yes	63.29	68.4562	-42308.5	1	No		68.491	74.843	0.33	6.3	70.7	78.36	67.79	63.29	71.7	67.51	73.62	70.52	65.89	64.4	70.86	68.5	68.83
204135_at	Yes	65.1101	968.578	2.06536e+06	-0.988644	Yes, but >10% FDR	0.002795	65.507	78.048	11084.4	-6	63.06	64.85	67.65	64.76	66.12	65.12	61.01	68.36	64	68.17	65.3	69.89	78.68
204137_at	Yes	88.7657	137.159	10662.1	9.11495	Yes, but >10% FDR	0.010264	91.217	137.587	10784.4	6.3	129.29	159.79	135.67	140.65	145.31	130.33	133.34	124.5	128.44	142.91	138.52	119.84	88.77
204142_at						Yes, but >10% FDR	0.019529	974.955	1153.84	40.046	6.3	1122.11	1137.78	1139.35	1154.46	1039.01	1303.34	1066.01	1015.52	957.41	1007.11	931.88	1028.27	909.54
204149_s_at	Yes	97.091	123.803	372.079	2.53519	Yes, but >10% FDR	0.0088434	95.991	124.018	404.367	2.4	120.09	127.82	108.68	140.65	118.52	123.04	132.33	116.4	112.99	94.16	99.18	102.25	93.25
204168_at						Yes, but >10% FDR	0.012866	1334.73	1696.92	3464.37	0.6	1693.09	1715.01	1784.12	1554.25	1637.18	1764.45	1703.16	1577.04	1622.5	1551.02	1620.25	1432.18	1358.69
204177_s_at						Yes, but >10% FDR	0.019726	149.44	198.094	344.367	0.3	193.06	203.8	198.64	180.89	177.91	188.18	188.58	160.34	185.21	172.8	162.24	171.02	153.17
204182_s_at						Yes, but >10% FDR	0.028241	105.884	122.014	247.319	-6	108.91	106.23	111.51	108.38	108.46	103.9	103.11	90.7	126.24	122.11	111.59	119.35	126.5
204203_at						Yes, but >10% FDR	0.036989	331.676	384.839	4304.37	6.3	375.07	389.37	381.62	395.08	397.83	355.82	418.19	377.15	384.54	373.77	376.37	314.95	349.71
204206_at						Yes, but >10% FDR	0.02023	487.244	581.359	1844.37	-1.2	527.12	526.76	463.04	481.04	479.37	460.16	483.04	460.8	520.95	523.48	527.49	605.51	562.22
204208_at						Yes, but >10% FDR	0.017673	106.212	119.04	1964.37	6.3	121.86	121.6	124.24	114.96	111.82	115.36	121.1	119.68	112.6	122.02	104.33	104.62	108.23
204218_at						Yes, but >10% FDR	0.018213	677.416	942.449	1364.37	0.6	943.65	915.87	977.53	1089.16	802.3	966.08	902.01	856.91	907.03	791.26	779.28	761.13	686.44
204238_s_at						Yes, but >10% FDR	0.032585	294.774	356.126	91.615	6.3	351	351.16	314.52	370.93	338.03	374.81	398.38	304.65	335	275.52	313.86	279.56	280.53
204246_s_at						Yes, but >10% FDR	0.025661	1850.01	2531.03	5384.37	0.9	2508.21	2443.95	2676.26	2388.68	2305.72	2784.11	2630.28	2445.65	2375.47	2253.58	2347.65	2228.72	1821.61
204254_s_at						Yes, but >10% FDR	0.025867	107.417	127.179	584.367	-2.7	109.43	99.04	100.92	103.18	111.66	110.74	116.57	109.97	111.89	123.04	138.24	135.2	113.38
204259_at						Yes, but >10% FDR	0.027412	4282.76	4876.24	404.367	0.3	4812.45	4827.3	4990.61	4760.84	4780.68	4454.35	4898.08	4570.07	4547.95	4611.43	4463.62	4525.93	4281.79
204265_s_at	yes	91.7918	2267.9	224248	-1.91298	Yes, and meet 10%FDR	0.00058666	90.677	135.036	13544.4	-6	89.79	102.18	88.1	86.88	89.33	87.49	89.88	91.01	89.45	103.47	93.64	96.67	137.28
204267_x_at						Yes, and meet 10%FDR	2.4231e-05	426.323	602.386	15284.4	-6	416.8	438.67	435.64	446.03	401.15	437.15	439.89	408.45	443.56	417.32	426.97	434.44	617.8
204278_s_at						Yes, and meet 10%FDR	0.00089495	636.882	795.338	33.937	1.8	769.2	785.79	803.41	886.51	754.3	772.83	703.3	653.48	629.04	630.35	665.36	577.23	665.83
204285_s_at						Yes, but >10% FDR	0.022691	288.766	350.184	11384.4	6.3	346.36	376.63	367.86	337.79	358.05	330.84	360.04	338.03	334.3	345.37	342.75	331.07	284.84
204288_s_at						Yes, and meet 10%FDR	0.00043655	66.752	77.318	40.046	-0.9	70.57	66.58	63.25	68.12	69.17	68.36	72.76	74.03	77.28	74.8	78.96	78.09	76.59
204295_at	Yes	890.377	2789.92	216065	0.26995	Yes, but >10% FDR	0.0046523	2024.46	2718.69	1484.37	0.6	2715.91	2955.12	2770.63	2606.68	2510.92	2805.42	2713.61	2445.65	2445.65	2373.83	2481.51	2176.81	2070.84
204303_s_at	yes	73.4929	3842.01	62787.2	-6.63049	Yes, and meet 10%FDR	0.00032059	73.34	99.056	16724.4	-6	71.52	77.49	67.18	75.69	76.69	71.21	75.53	75.27	70.67	73.26	75.01	72.4	101.2
204306_s_at						Yes, but >10% FDR	0.03586	931.645	1187.36	8684.37	1.5	1205.06	1237.32	1112.82	1191.03	1110.5	1302.44	1251.98	1117.45	1122.89	1158.47	1125.23	1081.64	917.14
204308_s_at	Yes	31.6431	123.145	187927	0.448497	Yes, but >10% FDR	0.0030697	94.087	122.257	3764.37	0.9	122.18	125.37	119.35	117.87	121.6	134.36	122.36	113.61	117.78	114.17	110.51	104.91	94.75
204310_s_at						Yes, but >10% FDR	0.023447	80.99	96.251	5564.37	-6	86.58	83.4	78.63	89.7	74.75	85.51	79.78	81.8	74.85	77.06	80.11	97.95	95.8
204322_at	Yes	100.288	254.166	35269	-8.14241	Yes, but >10% FDR	0.015875	99.724	130.693	16244.4	-6	97.64	100.15	87	107.63	101.83	102.96	89.51	106.45	104.04	107.41	99.04	99.8	132.79
204328_at	yes	92.9748	133.735	4694.31	-1.3507	Yes, and meet 10%FDR	0.0001924	92.727	134.661	4844.37	-1.2	99.11	91.01	99.39	87.55	100.64	92.22	86.52	88.22	90.89	102.25	106.97	123.55	130.51
204331_s_at						Yes, but >10% FDR	0.0067227	3283.84	3873.1	8564.37	6.3	3837.63	4042.41	4014.49	3945.52	3761.26	3827	3975.72	3605.54	3827	3737.87	3910.13	3441.93	3254
204332_s_at	yes	717.574	1279.8	25476.2	0.576999	Yes, and meet 10%FDR	0.00096619	961.349	1269.49	4964.37	1.2	1239.61	1243.34	1359.63	1274.75	1289.86	1292.55	1279.18	1164.1	1267.7	1203.48	1173.01	1045.52	993.24
204334_at	Yes	127.058	187.057	5258.21	-1.06504	Yes, but >10% FDR	0.0029651	128.689	173.877	4604.37	-6	128.45	125.02	122.02	136.81	132.24	109.21	130.15	134.36	124.59	150.96	133.99	178.28	174.85
204345_at						Yes, but >10% FDR	0.0045964	74.327	80.003	764.367	1.5	80.24	79.56	79.89	83.29	78.63	78.58	79.4	80.78	77.44	77.82	73.01	73.82	75.32
204404_at						Yes, but >10% FDR	0.038385	1705.55	2230.37	9104.37	1.8	2198.71	2157.28	2217.93	2595.87	2222.55	2208.73	2275.55	2092.48	2146.84	2072.28	2164.77	1983.73	1691.4
204411_at						Yes, but >10% FDR	0.044648	89.442	106.55	8564.37	-2.1	91.16	86.88	88.59	88.4	83.29	89.2	94.03	91.01	99.66	85.04	92.54	99.25	104.98
204417_at	Yes	470.239	583.604	1746.24	1.03208	Yes, but >10% FDR	0.0088922	471.125	579.786	1844.37	1.2	539.94	625.56	557.95	587.73	548.75	606.77	612.26	591.81	556.41	528.59	514.13	499.04	464.97
204420_at						Yes, and meet 10%FDR	1.3889e-05	110.099	229.526	8444.37	-1.5	105.35	100.29	110.05	117.87	91.52	114.72	114.56	103.82	116.16	121.6	137.95	165.88	230.72
204440_at						Yes, but >10% FDR	0.027235	114.657	147.537	2624.37	-6	115.31	114.4	125.19	97.75	142.12	106.37	117.62	114.8	114.33	110.89	141.53	155.96	142.42
204442_x_at						Yes, but >10% FDR	0.046347	76.399	90.821	12944.4	-6	78.59	78.52	67.6	81.06	78.3	78.41	71.66	73.93	72.2	78.85	77.39	78.9	91.77
204446_s_at	yes	137.104	554.804	68800.6	0.34412	Yes, and meet 10%FDR	0.0011404	361.826	550.915	1484.37	0.6	520.99	535.97	584.07	594.28	517.71	543.07	527.12	487.41	478.38	474.74	443.26	445.1	359.04
204477_at	Yes	102.609	140.033	10499.1	11.0503	Yes, but >10% FDR	0.0037173	104.266	139.388	10844.4	6.3	144.52	136.9	138.81	149.19	139.2	150.02	137.19	134.74	131.33	132.24	146.22	126.24	102.61
204480_s_at	Yes	215.94	293.924	1026.03	13.5561	Yes, but >10% FDR	0.0023487	216.504	293.022	944.367	6.3	276.35	297.76	295.09	297.97	288.41	287.82	318.91	254.23	328.78	235.73	219.49	225.66	202.67
204482_at						Yes, but >10% FDR	0.041544	90.605	111.312	10664.4	-6	97.34	92.22	87.79	99.18	82.48	97.55	93.05	84.74	89.08	91.84	85.87	98.91	111.89
204485_s_at						Yes, but >10% FDR	0.031196	1442.11	1606.22	127.564	6.3	1587.15	1451.17	1677.39	1673.9	1544.58	1685.55	1597.94	1534.98	1437.16	1436.16	1437.16	1395.92	1495.07
204490_s_at						Yes, but >10% FDR	0.029455	749.741	1019.31	1544.37	0.3	970.03	1046.24	935.76	1066.01	1008.5	924.8	944.89	977.53	874.31	892.06	858.69	925.44	747.02
204501_at						Yes, but >10% FDR	0.025757	101.063	128.22	5564.37	-6	97.64	91.27	99.94	84.51	103.39	95.94	105.2	112.91	112.28	109.82	98.77	132.51	126.76
204514_at	Yes	207.108	5634.99	505944	-1.38828	Yes, but >10% FDR	0.0034294	206.163	306.103	12284.4	-6	211.1	211.86	196.45	224.26	238.03	194.82	180.27	218.73	197.81	190.15	222.86	228.65	312.56
204518_s_at						Yes, but >10% FDR	0.047025	294.147	341.461	91.615	6.3	339.78	328.1	349.95	362.54	307.83	329.01	369.13	295.91	296.52	333.61	288.21	261.02	279.75
204535_s_at	yes	108.492	169.822	12596.2	-7.3736	Yes, and meet 10%FDR	0.0005445	107.868	165.957	12944.4	-6	109.63	112.6	99.39	94.09	124.33	105.79	114.17	107.11	110.51	108.68	107.11	117.95	169.72
204543_at	Yes	67.6	76.4158	-21952	1	No		73.976	84.772	40.046	6.3	81.2	81.29	78.74	88.4	72.45	99.04	79.95	74.29	68.03	78.52	67.6	77.65	75.06
204544_at						Yes, but >10% FDR	0.026047	153.005	186.009	9224.37	6.3	184.17	181.65	177.91	185.08	192.27	172.69	180.52	190.02	179.4	190.68	202.25	165.08	154.34
204546_at						Yes, but >10% FDR	0.022168	73.574	82.487	824.367	-3.9	77.71	79.4	72.76	75.64	72.86	69.07	69.02	70.47	73.72	80.34	80.17	83.63	83.46
204547_at						Yes, and meet 10%FDR	0.00045805	208.453	386.555	11024.4	6.3	404.84	391.26	404.78	384.28	383.48	375.33	434.44	378.46	363.3	357.55	352.38	323.81	198.91
204559_s_at						Yes, but >10% FDR	0.01834	2216.95	2385.62	47.254	3.9	2349.09	2422.03	2442.26	2323.36	2354.17	2393.66	2321.75	2219.47	2253.58	2155.79	2208.73	2142.38	2352.53
204564_at	Yes	78.2283	138.281	31192.4	-13.4294	Yes, but >10% FDR	0.0023576	77.983	99.665	18764.4	-6	79.43	76.85	75.79	80.17	77.17	81.29	77.87	76.64	78.03	76.11	85.98	73.41	100.57
204571_x_at	Yes	3567.94	3961.94	41.8213	15.3113	Yes, but >10% FDR	0.0064135	3567.95	3968.9	40.046	6	3799.69	4062.07	3745.65	4059.26	4098.84	4006.15	3787.42	3444.31	3613.05	3449.09	3590.58	3583.12	3727.52
204572_s_at						Yes, but >10% FDR	0.045323	221.531	280.192	8984.37	-6	215.02	215.87	212.31	231.68	260.47	231.84	220.4	217.82	237.54	237.37	211.72	260.11	282.67
204579_at						Yes, but >10% FDR	0.040672	157.071	214.867	6164.37	0.9	222.26	231.2	192.4	230.4	200.58	227.7	199.6	216.02	212.6	186.88	206.64	186.11	155.96
204589_at						Yes, but >10% FDR	0.027249	165.977	231.151	19544.4	6.3	236.91	243.88	234.43	242.36	219.34	242.02	222.24	219.49	220.86	229.13	214.52	269.1	161.12
204592_at	Yes	66.0767	85.1526	13150.4	-1.83873	Yes, but >10% FDR	0.0021314	66.213	81.87	10484.4	-2.7	66.68	67	63.96	64.89	66.35	65.21	67.09	72.25	61.99	65.12	68.03	73.16	81.74
204597_x_at						Yes, but >10% FDR	0.033439	114.209	139.649	6104.37	-1.8	112.87	107.49	101.62	124.85	113.54	114.56	122.45	121.94	117.95	113.14	121.35	131.6	138.91
204602_at	Yes	1639.14	5298.63	287556	0.271771	Yes, but >10% FDR	0.010505	3953.63	5213.45	1124.37	0.6	5222.61	5159.44	5267.86	5529.76	5202.54	4547.95	5195.33	4692.04	5028.81	4646.73	4153.18	4585.93	3899.3
204604_at						Yes, but >10% FDR	0.048478	72.577	82.02	344.367	-0.6	75.05	69.17	76.53	69.89	75.64	70.13	79.29	75.58	76.11	79.12	80.73	78.19	83.23
204615_x_at						Yes, but >10% FDR	0.030177	846.935	955.398	77.64	1.8	942.05	901.39	988.43	958.74	980.93	981.61	913.33	893.3	842.77	843.36	931.88	752.74	848.05
204623_at						Yes, but >10% FDR	0.037332	82.526	95.982	0.33	6.3	88.98	101.83	82.83	85.51	84.98	85.15	85.15	86.34	78.63	79.73	81.18	84.16	77.6
204632_at						Yes, but >10% FDR	0.005805	113.188	137.427	1004.37	-0.3	117.24	109.67	113.69	118.36	117.38	123.55	117.38	120.84	124.59	123.9	125.54	125.8	138.52
204640_s_at	Yes	355.16	429.49	115.093	15.8174	Yes, but >10% FDR	0.0074549	358.219	432.853	108.105	6.3	427.1	409.3	415.87	434.74	415.87	422.85	480.7	373.51	366.58	380.83	359.79	311.05	357.55
204641_at						Yes, but >10% FDR	0.023083	84.071	103.518	5144.37	6.3	102.1	96.27	113.22	101.62	107.71	95.34	115.36	99.18	104.18	101.34	102.96	81.29	84.57
204653_at	Yes	371.526	531.448	3183.08	-0.57957	Yes, but >10% FDR	0.013256	372.745	510.896	1904.37	-0.6	386.71	392.35	352.87	339.2	418.19	318.91	420.8	401.99	381.62	452.88	435.34	482.71	496.96
204654_s_at						Yes, but >10% FDR	0.0067414	106.313	128.994	209.592	-6	105.58	112.99	107.04	110.43	112.6	104.91	102.75	97.95	139.68	121.6	130.87	118.27	129.34
204684_at	Yes	-219.766	80.2941	3.17865e+06	0.629013	Yes, but >10% FDR	0.012836	65.409	79.656	8384.37	1.5	82.93	80.39	78.36	86.7	75.32	79.51	80.34	76.16	80	79.56	75.58	73.36	64.98
204696_s_at						Yes, but >10% FDR	0.035983	76.663	91.079	91.615	6	89.77	80.23	92.8	99.39	85.15	104.11	90.45	78.74	71.75	82.88	74.18	78.03	77.06
204711_at						Yes, but >10% FDR	0.043722	226.207	265.668	10.654	6.3	265.29	295.91	236.39	269.47	267.24	231.04	224.41	208.95	224.1	246.94	217.52	249.17	197.13
204714_s_at						Yes, but >10% FDR	0.046741	1765.44	2589.66	17144.4	6.3	2696.53	2659.61	2728.7	2916.45	2466.07	2850.5	2581.51	2395.32	2753.4	2349.28	2213.33	2597.67	1758.34
204724_s_at	yes	61.9671	292.244	38048.4	-8.05082	Yes, and meet 10%FDR	2.8192e-05	61.917	89.33	16724.4	-6	62.45	60.34	63.51	66.81	60.63	63.73	61.27	61.27	57.56	61.82	63.12	61.1	91.58
204725_s_at						Yes, but >10% FDR	0.014977	199.874	247.058	404.367	6.3	230.77	261.02	239.35	249.86	272.1	219.79	269.66	247.62	229.29	194.82	202.11	176.8	219.03
204733_at						Yes, but >10% FDR	0.039405	71.549	75.501	127.564	-6	71.96	72.1	71.8	72.1	71.75	70.77	70.23	73.67	78.09	76.74	74.54	71.31	77.87
204746_s_at	Yes	76.1409	92.93	10157.8	-39.3179	Yes, but >10% FDR	0.012483	76.14	92.378	10964.4	-6	77.56	79.23	76.21	78.68	73.41	82.94	78.74	73.67	72.15	72.61	72.35	82.03	92.93
204763_s_at						Yes, but >10% FDR	0.0028762	97.881	133.865	47.254	-5.7	96.02	95.54	93.25	86.34	120.01	83.81	111.2	148.16	130.6	139.49	124.24	126.24	134.46
204766_s_at						Yes, but >10% FDR	0.049195	138.782	196.488	3164.37	0.6	189.27	202.81	183.29	225.5	193.61	183.55	221.01	173.65	181.52	171.97	184.18	145.61	150.75
204776_at	yes	77.8803	1871.18	5.35157e+06	-0.810938	Yes, and meet 10%FDR	0.001066	78.175	103.353	10724.4	-2.4	80.42	78.74	79.07	79.4	72.86	77.23	72.5	80.9	83.63	76.16	84.16	87.85	104.47
204780_s_at	yes	524.941	675.891	7791.57	11.7208	Yes, and meet 10%FDR	0.0014073	517.962	677.036	6944.37	6.3	644.68	656.66	673.25	635.61	719.57	635.61	698.44	705.74	698.44	690.26	676.53	532.63	524.94
204806_x_at						Yes, but >10% FDR	0.0079799	212.144	372.881	5444.37	0.6	372.48	408.73	340.62	390.99	342.51	397	367.86	337.56	348.5	308.26	335	306.77	205.64
204824_at						Yes, but >10% FDR	0.032512	183.764	221.64	55.76	0.9	205.56	243.03	227.7	222.71	194.01	221.47	209.38	187.66	198.36	178.9	194.28	194.28	173.28
204825_at						Yes, but >10% FDR	0.039497	644.247	726.723	77.64	3.9	734.19	676.99	755.87	684.54	740.32	784.7	719.08	657.57	632.97	622.96	676.99	598	694.1
204833_at						Yes, but >10% FDR	0.049802	359.31	435.865	19184.4	-6	352.17	368.37	373.25	334.3	394.53	354.83	330.84	369.65	378.46	361.29	338.5	338.26	438.06
204838_s_at						Yes, but >10% FDR	0.014565	120.075	133.067	24.373	6.3	136.34	125.71	127.03	135.02	137.47	134.18	118.85	119.84	115.52	122.62	128.36	120.01	118.52
204842_x_at						Yes, but >10% FDR	0.035737	302.119	363.922	2204.37	6.3	374.08	337.33	347.77	396.18	334.76	360.79	336.86	360.79	367.6	396.73	300.25	319.79	282.87
204849_at						Yes, but >10% FDR	0.024057	87.144	112.059	11624.4	4.2	110.49	116.48	99.8	106.89	122.02	116	114.09	111.35	108.84	110.58	109.67	103.54	87
204858_s_at						Yes, but >10% FDR	0.029038	98.68	119.399	584.367	1.2	117.4	128.18	114.48	113.69	111.89	130.96	129.07	108.68	109.36	112.28	95.87	95.6	101.9
204859_s_at	Yes	94.68	97.7784	-1276.53	1	No		98.764	112.175	0.201	0.3	112.73	103.18	110.05	102.89	97.95	98.77	106.74	97.75	97.41	110.58	96.8	99.66	94.68
204868_at						Yes, but >10% FDR	0.044037	1254.76	1388.72	108.105	6	1396.13	1401.74	1305.15	1525.43	1380.52	1339.06	1427.23	1304.25	1150.46	1302.44	1249.38	1314.23	1216.9
204878_s_at	Yes	91.3559	774.338	39372.1	-9.99038	Yes, but >10% FDR	0.0091837	91.62	133.779	19184.4	-6	94.69	90.07	83.98	112.05	90.95	92.54	88.03	90.76	83.23	88.65	96.87	84.45	133.62
204895_x_at						Yes, but >10% FDR	0.048567	73.634	83.765	55.76	5.4	81.53	79.23	82.94	80.56	81.12	94.42	82.03	73.87	72.71	78.96	71.8	68.4	76.06
204899_s_at	yes	-67972.2	145.203	2.11283e+07	1.12885	Yes, and meet 10%FDR	0.00060526	105.286	145.091	13244.4	6.3	147.29	150.02	148.67	141.53	145.51	142.02	147.75	149.71	143.81	136.81	133.9	139.49	102.68
204900_x_at	Yes	860.312	958.329	126.217	31.3928	Yes, but >10% FDR	0.010175	863.352	954.537	150.526	5.4	950.44	1000.15	961.4	952.78	962.74	878.56	1002.23	925.44	835.21	877.95	856.32	883.45	848.63
204901_at						Yes, but >10% FDR	0.016261	84.826	105.651	65.796	-6	86.87	87.31	81.86	82.77	96.94	77.39	84.68	108.01	110.05	91.39	98.56	104.91	115.44
204904_at						Yes, but >10% FDR	0.0066273	66.831	73.603	77.64	6.3	73.41	73.06	73.98	77.82	72.76	68.5	74.65	66.39	66.9	67.93	67.46	64.85	67.46
204946_s_at						Yes, but >10% FDR	0.032916	129.351	160.641	291.836	-1.8	136.07	127.91	122.53	127.29	131.42	134.36	132.97	133.99	149.91	150.23	186.75	162.58	136.81
204959_at						Yes, but >10% FDR	0.019657	70.34	79.888	9884.37	-6	69.33	73.21	68.88	72.45	71.01	69.7	65.89	70.77	71.46	73.87	70.03	75.27	79.95
204972_at	Yes	87.2741	100.603	16.4611	-10.55	Yes, but >10% FDR	0.012082	87.534	99.982	20.655	-6	90.59	84.33	94.81	84.16	82.48	88.95	100.92	101.97	94.68	109.29	96.8	97.95	102.61
204974_at	Yes	103.841	296266	67814.3	-10.4604	Yes, but >10% FDR	0.0086772	104.526	158.752	19124.4	-6	104.07	95.34	103.82	108.76	117.38	111.35	97.01	110.97	119.68	94.94	97.68	85.09	162.24
204985_s_at	Yes	831.301	1012.81	405.653	0.629526	Yes, but >10% FDR	0.006477	823.066	1011.99	524.367	0.6	1013.41	1008.5	1068.97	972.13	972.8	976.18	1023.29	909.54	981.61	848.05	902.01	808.44	869.47
204988_at						Yes, but >10% FDR	0.046487	578.263	679.66	3.344	6.3	638.51	637.38	735.2	708.19	593.46	588.95	611.84	578.43	641.36	593.05	552.18	580.44	497.65
204991_s_at						Yes, but >10% FDR	0.043049	68.978	74.845	0.754	6.3	71.59	76.8	75.85	66.44	71.66	70.62	70.13	70.33	69.31	69.36	66.58	65.12	69.07
205003_at	yes	-1948.17	114.793	45031.3	10.1424	Yes, and meet 10%FDR	0.0006771	83.788	115.183	18284.4	6.3	114.43	118.77	114.4	114.01	114.48	108.08	118.77	112.99	107.86	115.76	117.38	120.59	81.8
205016_at						Yes, and meet 10%FDR	0.0012433	289.22	504.533	5444.37	-0.9	289.79	279.56	313.65	229.92	298.17	299.83	281.5	326.06	327.42	307.83	400.87	379.77	501.81
205017_s_at						Yes, but >10% FDR	0.04714	66.059	71.218	209.592	6.3	70.14	69.79	72.61	71.41	71.8	67.6	70.47	74.03	62.55	67	66.35	69.5	63.34
205020_s_at	yes	32.1056	859.152	57805.5	0.511547	Yes, and meet 10%FDR	0.00011781	494.284	848.552	4304.37	0.9	840.05	876.13	853.95	890.83	871.89	762.71	883.45	798.42	829.44	734.69	734.69	599.66	519.15
205032_at	Yes	121.763	150.656	7830.92	-2.02099	Yes, but >10% FDR	0.0073736	121.988	149.9	7664.37	-2.1	122.21	120.18	118.69	130.33	119.18	129.34	121.77	125.63	108.53	121.77	126.94	139.39	148.98
205035_at						Yes, but >10% FDR	0.019836	85.943	102.101	1784.37	6.3	100.79	104.76	101.2	109.14	90.26	108.68	98.22	101.62	104.76	103.25	80.9	86.76	90.82
205037_at						Yes, but >10% FDR	0.032934	569.536	739.578	5924.37	6.3	720.63	796.76	790.16	800.63	690.74	700.87	718.58	630.78	754.83	701.35	776.05	541.94	589.77
205067_at	Yes	91.3746	117.449	721.617	-1.377	Yes, but >10% FDR	0.012901	92.8	117.298	1304.37	-6	94.85	87.43	101.97	82.88	99.46	79.95	92.35	92.99	104.11	99.39	126.24	112.36	115.44
205078_at						Yes, but >10% FDR	0.030344	1163.92	1478.18	7304.37	6.3	1515.01	1637.18	1583.61	1394.95	1497.15	1331.65	1525.43	1364.35	1498.18	1405.63	1561.81	1197.66	1173.82
205080_at						Yes, but >10% FDR	0.04084	108.04	147.875	11624.4	6	143.34	135.49	144.51	140.75	152.43	129.43	158.9	144.41	149.71	165.65	149.4	136.33	107.04
205081_at						Yes, but >10% FDR	0.011381	1975.25	2340.35	127.564	0.9	2276.78	2305.72	2310.52	2432.12	2172.29	2537.16	2093.93	2179.83	2099.75	2060.82	1938.87	1986.48	1971.39
205087_at	Yes	69.1162	99.7208	11493.7	9.45284	Yes, but >10% FDR	0.0091291	70.547	99.433	12344.4	6.3	93.73	105.27	101.76	97.82	107.49	88.52	94.22	97.21	104.26	100.57	106.08	93.25	69.12
205088_at	Yes	159.038	218.43	5573.5	-135.624	Yes, but >10% FDR	0.0040497	158.736	222.64	6344.37	-6	169.37	158.9	147.54	172.92	173.28	150.23	136.52	142.02	161.23	178.4	158.57	219.49	217.37
205098_at						Yes, but >10% FDR	0.045735	60.733	69.237	77.64	-6	63.82	61.18	63.56	59.8	63.87	60.13	56.14	69.26	70.47	63.6	66.76	68.17	76.9
205105_at	Yes	-11036.9	821.205	40006.1	13.3236	Yes, but >10% FDR	0.0043587	580.581	831.423	18284.4	6.3	831.81	805.09	845.11	762.19	837.53	843.94	810.12	852.17	852.76	809	738.27	866.47	570.47
205125_at	Yes	205.522	284.968	48.99	-30.4021	Yes, but >10% FDR	0.011052	205.305	285.686	65.796	-6	212.86	205.5	190.94	210.55	241.19	172.09	205.93	326.06	236.88	281.5	251.95	312.13	301.29
205126_at	Yes	539.32	719.327	8703.51	15.5468	Yes, but >10% FDR	0.0031395	534.793	715.878	7484.37	6.3	699.04	688.83	771.76	674.65	772.83	658.94	740.83	746.5	714.6	703.79	740.83	557.95	539.32
205128_x_at	Yes	83.0242	97.2005	12711.2	-5.46557	Yes, but >10% FDR	0.0048627	82.727	96.146	12044.4	-6	84.84	82.83	84.86	82.71	86.34	86.1	81.52	82.54	81.12	77.87	82.54	86.04	97.07
205141_at	Yes	1386.42	1687.46	115.645	0.738019	Yes, but >10% FDR	0.0058477	1358.99	1690.24	177.621	0.6	1613.52	1709.08	1747.41	1760.78	1503.39	1693.74	1616.88	1484.75	1491.97	1477.56	1393.02	1312.41	1457.22
205142_x_at						Yes, but >10% FDR	0.016822	80.218	99.617	15584.4	-6	80.63	73.98	81.01	81.06	76.9	80.28	75.9	83.92	81.63	89.51	80.9	81.35	99.73
205152_at						Yes, but >10% FDR	0.04249	67.966	79.539	19724.4	-6	66.34	68.36	70.28	71.66	65.39	70.08	63.47	68.03	69.41	69.41	67.18	61.65	80.28
205156_s_at	yes	94.4489	145.192	13254.4	-6.13195	Yes, and meet 10%FDR	0.0012006	94.693	141.914	13244.4	-6	91.63	85.21	92.16	88.4	104.11	86.22	96.87	100.29	107.63	94.88	91.52	101.9	145.01
205158_at	yes	992.378	1565.1	3110.22	0.638911	Yes, and meet 10%FDR	0.00063558	1085.03	1556.76	1844.37	0.9	1487.72	1558.56	1694.92	1595.73	1456.21	1566.14	1584.71	1397.86	1487.84	1371.94	1316.96	1106.66	1131.48
205189_s_at	Yes	109.609	123.565	3141.12	-14.5857	Yes, but >10% FDR	0.0036316	109.827	123.687	2924.37	-6	107.08	115.52	107.34	110.05	109.59	104.11	110.74	114.4	110.66	106.6	119.43	121.94	125.19
205193_at	Yes	72.7573	107.372	8275.61	-0.717099	Yes, but >10% FDR	0.0018994	73.159	101.159	4904.37	-0.9	75.58	72.55	72.5	75.74	71.16	64.09	75.06	76.21	83.11	74.8	81.74	95.27	96.14
205203_at						Yes, but >10% FDR	0.037964	105.046	122.813	65.796	-6	105.78	115.52	103.39	100.5	110.35	94.94	103.97	124.67	135.02	115.28	110.35	125.28	121.1
205211_s_at	Yes	95.1391	127.56	10243.7	-12.177	Yes, but >10% FDR	0.0055209	94.466	126.826	10364.4	-6	99.06	99.39	95.08	105.71	90.26	97.14	98.98	96.67	88.65	83.63	91.96	108.99	127.56
205216_s_at						Yes, but >10% FDR	0.020509	284.552	383.291	584.367	6.3	318.59	346.09	363.8	431.73	408.73	403.38	417.9	338.97	382.15	261.38	318.03	268.17	273.61
205222_at	Yes	68.45	73.9849	-13964.8	1	No		71	75.716	33.937	6.3	75.82	69.26	76.9	78.3	71.7	85.63	71.46	71.8	72.35	75.17	69.55	68.45	69.99
205232_s_at						Yes, but >10% FDR	0.024896	93.437	127.936	8804.37	6.3	117.36	127.73	129.16	132.61	134.92	115.84	118.11	118.19	135.39	127.12	142.52	103.82	94.75
205239_at						Yes, and meet 10%FDR	0.00095846	619.569	925.35	11264.4	-6	596.44	596.76	650.32	505.3	618.66	574.04	656.2	644.04	630.78	636.49	666.75	720.57	943.58
205241_at						Yes, but >10% FDR	0.048272	257.454	313.246	40.046	6.3	308.81	294.27	294.27	298.38	302.12	381.62	286.22	262.29	233.78	257.6	274.95	242.86	273.24
205244_s_at						Yes, but >10% FDR	0.028334	65.012	78.859	584.367	-0.3	65.49	65.39	66.53	64.49	72.45	65.39	67.7	73.47	71.9	74.49	70.42	71.26	78.96
205245_at	yes	83.8798	856.628	50270.3	-4.9714	Yes, and meet 10%FDR	3.5969e-05	83.319	134.621	15944.4	-6	83.08	87.85	76.69	88.77	87.18	80.45	81.4	80.28	90.57	79.01	87.43	84.1	139.01
205251_at						Yes, but >10% FDR	0.031775	383.532	625.501	9644.37	1.2	661.79	692.66	636.49	628.6	614.39	518.79	590.58	605.09	668.14	631.66	509.88	566.13	385.88
205252_at						Yes, but >10% FDR	0.019315	96.446	112.604	704.367	1.5	109.44	104.26	110.43	110.89	122.11	119.68	114.25	109.74	108.53	101.83	95.47	103.54	91.9
205256_at						Yes, but >10% FDR	0.047369	73.499	91.441	9764.37	-3.6	69.7	74.85	70.08	69.12	78.79	64.89	81.63	78.9	77.39	71.66	74.59	82.77	91.77
205257_s_at						Yes, but >10% FDR	0.016539	86.886	106.101	1664.37	-6	88.36	88.34	84.74	82.77	90.64	82.65	82.83	93.96	91.77	88.16	107.78	114.8	93.77
205262_at	Yes	59.22	65.0221	-18432.6	1	No		62.623	66.162	65.796	6.3	67.23	64.53	66.49	64.94	59.34	76.37	67.93	59.22	59.34	67.7	59.63	67.51	60.09
205291_at	yes	78.9067	1227.86	137912	-2.04996	Yes, and meet 10%FDR	0.00095598	79.382	123.998	14204.4	-6	78.45	78.74	73.31	76.69	89.2	66.81	72.4	87.24	84.04	81.01	81.12	83.75	127.29
205294_at						Yes, but >10% FDR	0.012197	88.718	134.29	4784.37	-0.6	91.15	88.28	85.81	90.51	88.46	82.94	90.07	98.7	104.91	98.77	117.62	96.54	132.79
205303_at	Yes	82.7247	645.731	3.19886e+07	-0.537566	Yes, but >10% FDR	0.027486	82.994	95.722	6764.37	-0.9	81.55	85.69	86.7	79.34	79.56	79.34	84.1	87.37	84.04	84.92	87.91	87.55	96.4
205305_at	yes	622.553	748.077	186.402	0.633962	Yes, and meet 10%FDR	0.00046129	618.736	751.258	177.621	0.6	714.33	741.86	780.9	751.69	747.02	718.58	706.23	674.65	699.41	652.58	622.53	652.12	616.52
205308_at						Yes, but >10% FDR	0.041766	246.927	398.809	8084.37	0.9	391.35	428.16	352.87	389.1	414.43	476.39	397.55	417.9	354.59	368.37	341.09	366.33	238.36
205315_s_at						Yes, but >10% FDR	0.014899	121.03	196.111	13304.4	6.3	198.04	216.02	209.82	201.83	187.14	209.09	223.79	180.39	193.74	190.02	165.77	186.11	117.95
205320_at	Yes	76.645	45845.5	59437.9	-11.0435	Yes, but >10% FDR	0.011514	77.155	100.077	19004.4	-6	76.8	78.58	75.69	78.41	76.11	86.34	80.95	73.57	68.17	76.43	76.59	72.1	100.71
205321_at	Yes	1091.8	1956.17	13191.6	0.493083	Yes, but >10% FDR	0.0091719	1375.35	1936.78	3104.37	0.6	1828.36	1829.2	2184.37	2017.01	1913.5	1847.04	1996.14	1920.15	1736.54	1785.36	1583.61	1670.43	1393.02
205322_s_at	yes	137.862	187.53	9257.48	-9.30796	Yes, and meet 10%FDR	5.2085e-05	138.28	190.72	9164.37	-6	137.08	140.65	133.62	132.97	144.11	138.14	127.29	143.41	136.33	145.51	137.38	171.25	187.53
205348_s_at						Yes, but >10% FDR	0.045106	82.698	101.498	2324.37	-6	82.37	84.16	93.9	92.54	83.75	73.47	83.29	79.01	74.85	77.12	100.29	108.91	92.41
205349_at						Yes, but >10% FDR	0.042794	62.575	72.698	40.046	6.3	66.36	66.58	75.32	79.18	70.77	76.27	66.35	59.71	65.62	62.47	60.38	60.93	68.07
205357_s_at						Yes, but >10% FDR	0.025201	339.569	598.551	3944.37	0.6	606.91	653.93	633.41	638.7	483.71	617.8	590.18	496.96	526.76	590.99	441.72	491.82	336.86
205407_at						Yes, but >10% FDR	0.036045	67.393	82.994	11684.4	2.7	83.2	86.28	83.17	85.15	73.57	85.33	82.54	87.12	79.51	85.27	81.97	76.96	68.59
205412_at	Yes	-993.163	1158.36	794813	0.581692	Yes, but >10% FDR	0.0052994	877.053	1144.5	8084.37	2.1	1172.92	1167.33	1102.83	1100.54	1238.18	1124.45	1234.75	1138.56	1083.14	1095.22	1115.91	984.33	882.22
205417_s_at	Yes	152.027	1280.94	2.0692e+06	0.232337	Yes, but >10% FDR	0.0056684	959.652	1247.34	1064.37	0.6	1276.42	1277.4	1226.22	1309.68	1114.36	1250.25	1219.44	1154.46	1202.65	1076.4	1014.11	1105.13	949.48
205424_at						Yes, but >10% FDR	0.02074	70.233	88.388	9884.37	-3.9	71.95	67.98	70.33	72.86	74.96	79.4	70.52	67.65	65.21	65.57	70.23	79.45	87.73
205437_at						Yes, but >10% FDR	0.038363	87.71	100.995	5804.37	-6	87.67	85.75	84.33	84.04	86.82	81.86	93.12	92.03	96.6	89.95	86.76	102.18	100.29
205448_s_at	Yes	106.209	137.58	5910.96	-0.929993	Yes, but >10% FDR	0.0091602	106.462	133.281	4064.37	-1.2	106.69	105.71	101.76	113.85	113.93	93.64	112.28	103.11	106.3	114.25	118.11	124.33	132.51
205456_at	Yes	84.7061	97.7408	273.715	-2.27243	Yes, but >10% FDR	0.0056771	84.581	97.356	247.319	-2.4	89.46	82.31	84.86	84.45	89.57	79.01	82.48	87.85	92.35	101.13	92.54	95.41	102.04
205479_s_at	yes	972.273	2243.56	21440.3	-1.7065	Yes, and meet 10%FDR	5.2747e-05	984.957	1747.22	11144.4	-6	1042.86	1001.54	919.69	1132.27	902.01	1024	931.23	904.51	871.89	1000.15	1026.13	1243.34	1785.36
205485_at						Yes, but >10% FDR	0.038185	90.21	113.716	40.046	6.3	104.55	100.15	113.61	115.76	108.46	137.95	100.85	88.65	93.18	101.97	83.69	87.12	88.46
205507_at	Yes	74.1028	21883.1	1.89424e+07	-1.05395	Yes, but >10% FDR	0.0065854	74.576	97.593	12284.4	-6	72.99	71.9	68.93	68.12	76.11	79.12	69.94	76.9	82.31	76.8	77.12	79.73	98.91
205508_at	yes	107.321	485.547	34964	-9.10067	Yes, and meet 10%FDR	4.1882e-05	106.776	176.718	16484.4	-6	110.05	105.57	106.01	107.19	117.13	108.84	109.97	105.27	115.68	103.04	93.31	105.79	182.53
205510_s_at	Yes	-348.179	71.1951	1.76549e+07	0.515771	Yes, but >10% FDR	0.01283	55.921	70.976	5744.37	0.9	70.65	69.17	72.76	74.85	71.21	66.03	72.91	68.5	73.98	65.3	64.27	65.48	55.41
205521_at	yes	133.165	176.31	9815.99	-13.2035	Yes, and meet 10%FDR	0.001215	133.703	177.384	9704.37	-6	135.64	127.38	129.43	129.16	147.14	133.99	138.33	122.62	136.62	137.47	127.03	157.37	176.31
205536_at	Yes	83.4544	128.709	8723.81	0.674079	Yes, but >10% FDR	0.0096472	95.31	129.247	3164.37	0.9	130.61	122.96	125.19	142.42	119.51	135.86	120.09	124.5	131.69	114.17	114.96	104.84	97.14
205538_at	Yes	-120954	123.355	1.10546e+08	1.01757	Yes, but >10% FDR	0.009952	94.616	122.62	13964.4	6.3	125.23	120.93	120.84	130.42	123.98	127.29	118.93	120.59	121.52	128.36	109.67	119.51	94.09
205543_at	Yes	319.972	378.686	74.0246	101.503	Yes, but >10% FDR	0.0023048	319.174	381.208	77.64	6.3	378.87	363.55	373.25	369.13	368.37	402.82	394.81	315.17	324.03	314.52	343.94	328.56	288.81
205575_at	yes	136.017	177.576	879.981	-1.62001	Yes, and meet 10%FDR	0.0011697	136.472	180.269	1004.37	-1.5	135.38	125.02	135.02	139.97	150.54	131.96	124.16	148.98	145.31	155.2	180.64	180.39	169.95
205579_at	yes	112.298	148.654	1540.75	-159.524	Yes, and meet 10%FDR	0.0010289	111.756	146.762	1844.37	-6	113.12	104.76	104.4	109.29	120.18	105.86	111.04	114.96	127.12	105.42	157.15	142.12	146.73
205580_s_at	yes	102.71	36946.3	2.02558e+06	-1.45235	Yes, and meet 10%FDR	1.3219e-05	103.645	177.828	12824.4	-6	102.92	101.76	97.28	96.6	108.61	108.08	91.65	109.97	105.13	102.54	111.43	116.97	183.93
205596_s_at						Yes, but >10% FDR	0.028911	242.279	333.502	12524.4	-6	241.72	277.82	235.4	275.9	221.94	215.72	210.55	233.13	259.57	254.41	228.65	260.66	337.09
205599_at						Yes, but >10% FDR	0.016435	77.749	88.959	65.796	-6	78.26	84.45	75.06	74.96	81.69	73.06	76.8	95.8	90.2	90.13	83.4	85.75	87.43
205606_at						Yes, but >10% FDR	0.030937	185.68	224.812	40.046	-6	205.04	192.54	180.64	158.02	206.5	174.61	203.23	237.54	207.65	209.67	236.39	239.19	218.43
205610_at						Yes, but >10% FDR	0.028349	88.536	105.514	10184.4	-3.6	91	94.75	93.38	84.45	87.79	88.89	92.16	79.95	84.62	89.76	89.64	96.6	105.93
205627_at	Yes	653.818	759.106	110.955	43.1764	Yes, but >10% FDR	0.011796	653.337	759	77.64	6.3	731.87	749.09	703.79	797.86	769.62	766.96	794.55	654.84	584.48	685.02	707.7	633.41	658.48
205641_s_at						Yes, but >10% FDR	0.025403	743.264	836.776	404.367	6.3	840.05	860.48	819.16	795.66	810.69	890.83	770.69	865.87	807.32	709.67	762.71	755.35	731.64
205650_s_at						Yes, but >10% FDR	0.025867	159.761	234.334	4484.37	0.9	204.43	230.56	229.6	244.21	270.03	208.8	239.02	227.54	226.91	208.08	211.42	190.15	158.35
205657_at						Yes, but >10% FDR	0.027815	65.9	76.37	127.564	6.3	76.72	86.04	73.82	75.11	72.4	77.44	78.52	71.56	62.08	68.17	70.23	62.25	70.38
205665_at						Yes, but >10% FDR	0.047949	73.68	83.872	209.592	0.6	78.38	88.1	86.52	82.6	82.08	81.01	81.06	79.29	75.69	82.88	71.7	74.54	74.65
205671_s_at						Yes, but >10% FDR	0.024311	75.515	84.531	28.76	-6	77.25	76.69	82.37	76.64	71.7	71.31	84.57	88.83	84.45	84.27	84.92	84.1	79.51
205674_x_at						Yes, but >10% FDR	0.027665	1684.54	1927.15	77.64	6.3	1910.85	1914.83	2028.22	2019.8	1662.34	1971.39	1941.56	1698.45	1699.62	1765.67	1691.4	1677.39	1569.4
205701_at						Yes, but >10% FDR	0.033571	106.367	126.874	127.564	2.4	116.18	124.16	120.59	141.53	131.51	137.09	124.41	117.62	107.56	113.85	109.21	114.17	94.55
205710_at	Yes	90.685	3289.69	493715	-1.639	Yes, but >10% FDR	0.0025052	90.953	121.279	13724.4	-6	90.37	87.97	92.03	83.63	93.31	85.27	89.33	96.27	87.12	101.27	93.25	94.68	122.96
205720_at	yes	66.4325	321.469	50795.8	-4.32055	Yes, and meet 10%FDR	0.00068445	66.23	88.391	15824.4	-6	69.21	67.09	66.21	69.36	66.49	67.56	69.84	61.95	63.96	68.4	60.59	66.76	90.2
205726_at						Yes, but >10% FDR	0.023893	697.777	820.99	764.367	6.3	791.62	848.63	821.43	872.49	768.55	784.16	863.47	749.61	866.47	700.38	722.57	730.63	625.12
205732_s_at						Yes, but >10% FDR	0.036545	68.806	79.176	14204.4	5.7	81.1	74.03	81.06	75.64	80	78.58	82.08	79.56	81.18	78.47	77.17	77.98	68.83
205749_at	Yes	68.3777	15765.5	2.33633e+06	-1.31357	Yes, but >10% FDR	0.0017222	68.477	119.826	15344.4	-6	65.16	70.96	66.39	62.08	66.67	64.71	69.07	67.98	73.57	66.58	90.7	71.56	120.93
205767_at						Yes, and meet 10%FDR	0.00098957	388.289	733.389	7664.37	-1.2	387.9	359.04	419.93	348.98	408.73	341.32	392.9	363.04	486.4	425.5	509.17	516.63	743.92
205805_s_at	yes	467.487	592.64	1128.54	-13.477	Yes, and meet 10%FDR	0.00068019	464.451	589.617	1124.37	-6	446.65	494.56	440.5	479.04	474.08	481.37	465.94	443.87	481.37	523.48	617.8	617.8	542.32
205808_at						Yes, but >10% FDR	0.015693	765.804	1033.31	6164.37	0.9	1017.79	944.89	1135.41	1039.01	995.31	1071.19	1009.9	1010.6	1028.27	922.88	964.07	919.05	757.97
205812_s_at						Yes, but >10% FDR	0.016475	2976.67	4150.18	14864.4	6.3	4312.57	4592.3	4190.77	3959.22	4087.49	4579.58	4176.27	4266.98	4182.07	3902.01	3709.48	4064.89	2926.58
205814_at						Yes, but >10% FDR	0.038274	71.282	89.3	19544.4	-6	70.54	68.21	69.02	70.13	78.14	73.47	76.11	72.76	65.8	76.85	67.42	64.58	89.95
205830_at						Yes, but >10% FDR	0.041033	134.554	158.484	4184.37	6.3	162.82	145.31	160.56	160.9	168.31	147.54	158.68	161.79	161.68	152.11	154.24	127.47	143.21
205831_at	Yes	84.3861	2873.91	1.17941e+08	-0.513462	Yes, but >10% FDR	0.021795	85.124	125.499	7484.37	-0.9	84.35	82.25	84.45	74.91	94.35	81.91	78.14	93.18	104.04	85.81	99.53	97.82	126.94
205867_at						Yes, but >10% FDR	0.040103	79.036	91.885	1784.37	1.8	89.24	90.2	101.34	88.89	84.86	92.16	99.94	92.99	94.29	86.04	83.87	77.76	79.78
205869_at	yes	69.5599	359.842	40827.9	-8.65669	Yes, and meet 10%FDR	0.0012048	69.797	87.039	18044.4	-6	70.75	73.11	70.82	69.36	71.9	64.4	69.41	72.15	67.88	68.83	69.07	67.04	88.4
205898_at						Yes, but >10% FDR	0.044621	66.268	71.594	177.621	-6	68.27	69.55	64.8	68.45	65.25	64	65.89	66.17	76.59	68.36	71.21	71.26	72.5
205912_at	Yes	18.4044	71.8569	1.13745e+06	0.487626	Yes, but >10% FDR	0.018303	63.88	71.481	6104.37	1.2	72.03	74.18	71.01	72.96	68.03	70.62	72.55	73.41	69.26	69.6	69.89	66.72	64.09
205913_at	Yes	99.2122	681.353	53184.7	-3.94669	Yes, but >10% FDR	0.0023914	99.459	151.868	16544.4	-6	96.1	103.61	94.81	86.64	98.63	93.51	95.14	93.31	118.36	104.47	106.97	99.8	154.24
205936_s_at						Yes, but >10% FDR	0.035655	84.667	102.169	8084.37	-6	85.4	84.16	77.98	93.57	83.4	88.95	90.51	86.04	80.84	77.55	77.33	98.56	102.11
205942_s_at	Yes	280.145	374.309	4635.57	0.850869	Yes, but >10% FDR	0.0038771	289.918	374.345	3344.37	0.9	358.1	379.51	395.35	363.04	387.22	347.05	393.17	355.57	379.51	346.09	331.3	317.15	294.07
205951_at						Yes, but >10% FDR	0.023632	66.669	82.382	13424.4	-6	65.76	58.49	71.7	68.88	62.21	68.59	70.62	67.93	63.87	66.53	64.18	68.93	83.34
205957_at	Yes	74.213	85.0344	1842.62	-1.36351	Yes, but >10% FDR	0.0084333	74.47	84.745	1784.37	-1.5	74.95	74.59	71.21	80.56	72.76	75.9	70.82	73.87	73.62	79.4	81.57	82.14	86.34
205961_s_at						Yes, but >10% FDR	0.033083	436.825	640.229	12944.4	3.6	637.33	616.95	657.11	654.84	691.7	526.39	709.18	616.95	631.22	664.9	599.66	585.69	439.28
205963_s_at						Yes, but >10% FDR	0.049711	549.858	693.014	19244.4	6.3	683.17	777.12	709.67	719.57	673.72	718.08	668.14	655.75	651.67	689.31	685.49	752.21	541.19
205985_x_at	Yes	-40.1701	79.5525	9.68316e+06	0.386223	Yes, but >10% FDR	0.013983	67.551	79.835	2444.37	0.6	75.46	79.29	80.78	80.84	79.62	82.48	80.95	75.27	74.03	74.8	74.96	74.03	66.95
205988_at	Yes	68.55	77.7609	-43164.2	1	No		73.903	78.828	150.526	-6	75.28	69.55	83.87	68.55	73.11	79.4	68.78	74.65	87.24	78.96	77.76	72.15	75.11
206017_at						Yes, but >10% FDR	0.025647	66.727	80.305	2864.37	6.3	79.76	83.69	76.96	85.69	87.97	77.49	77.17	75.9	74.03	84.16	70.42	68.97	64.71
206032_at						Yes, but >10% FDR	0.020468	65.3	70.061	108.105	6.3	68.69	68.26	69.17	72.3	70.86	70.77	71.61	66.58	66.39	67.04	64.31	60.63	66.86
206034_at						Yes, but >10% FDR	0.030563	120.986	139.182	47.254	-5.4	112.67	128.44	118.27	108.61	137.19	112.13	127.47	139.01	143.91	135.49	137.85	141.63	134.36
206035_at						Yes, but >10% FDR	0.010959	64.946	92.554	6404.37	-0.9	68.06	65.8	63.91	58.97	67.65	58.36	62.34	73.16	73.21	65.89	78.09	74.29	93.18
206038_s_at						Yes, but >10% FDR	0.038318	67.307	75.947	1544.37	6.3	73.6	75.22	73.06	74.85	74.7	77.01	82.03	77.06	71.36	75.37	63.38	69.07	69.65
206050_s_at						Yes, but >10% FDR	0.034653	1312.81	1552.42	3344.37	0.6	1570.85	1558.56	1562.89	1531.79	1494.04	1715.01	1527.55	1486.81	1437.16	1522.26	1467.35	1364.35	1339.98
206062_at						Yes, but >10% FDR	0.031475	75.464	85.709	5144.37	-6	73.18	74.08	76	67.28	76	73.41	78.09	77.12	80.45	76.16	75.27	88.28	83.75
206087_x_at						Yes, but >10% FDR	0.02133	313.493	458.675	13964.4	6.3	453.72	476.06	517.35	464.33	447.58	468.53	467.56	423.44	493.19	395.63	430.84	442.64	309.12
206094_x_at						Yes, but >10% FDR	0.0093498	4443.61	5517.59	6584.37	1.2	5601.77	5893.87	5768.58	5256.91	5397.22	5374.82	5626.41	5188.13	5568.22	5195.33	5300.82	4901.47	4435.87
206099_at						Yes, but >10% FDR	0.048008	99.893	129.06	18044.4	-6	99.93	91.39	96.74	89.7	116.65	103.11	96.4	92.48	104.33	102.11	102.61	99.59	128.27
206111_at						Yes, but >10% FDR	0.025688	72.223	82.1	55.76	-6	71.06	71.01	69.84	67.93	78.03	75.27	72.86	86.94	83.23	82.25	77.87	84.27	75.17
206123_at						Yes, and meet 10%FDR	0.00053369	181.663	406.759	13544.4	-6	160.02	166	168.31	148.88	197.68	137.19	169.37	247.45	185.72	205.64	193.74	211.86	421.39
206137_at	Yes	102.609	1740.48	45799.1	-8.53504	Yes, but >10% FDR	0.0038256	101.892	143.481	16604.4	-6	100.62	101.48	101.62	113.85	111.28	109.74	98.5	90.45	107.93	96.2	98.09	101.55	145.71
206141_at						Yes, but >10% FDR	0.043075	118.096	136.465	77.64	6.3	127.68	132.79	125.63	148.06	147.85	133.34	143.11	118.27	130.96	118.77	119.51	111.82	114.56
206146_s_at	Yes	87.0583	30867	57479.3	-10.6125	Yes, but >10% FDR	0.01311	87.318	116.576	18764.4	-6	88.66	87	97.68	86.04	89.02	92.67	81.06	78.36	89.76	92.99	81.18	80.28	118.03
206148_at	yes	84.7644	129.506	14464.9	-6.32788	Yes, and meet 10%FDR	2.0654e-05	84.778	126.162	14264.4	-6	86.96	81.69	84.39	84.27	84.57	84.16	94.42	83.81	80.17	84.1	83.87	88.71	129.07
206154_at	Yes	70.8433	81.1267	1447.99	-18.9825	Yes, but >10% FDR	0.0061814	70.708	80.735	1724.37	-6	71.8	73.47	69.89	66.39	67.79	69.12	72.35	77.23	69.55	70.91	82.03	81.35	80
206156_at						Yes, but >10% FDR	0.015655	66.194	72.389	209.592	-6	66.05	65.62	62.29	64.85	70.08	64.53	69.21	65.16	73.98	70.42	72.25	73.36	70.62
206171_at	Yes	70.9502	3510.3	953530	-1.40277	Yes, but >10% FDR	0.0039073	71.33	96.169	13184.4	-6	69.78	67.88	67.18	76.96	78.36	68.03	63.73	70.52	71.56	74.8	74.54	75.22	97.88
206180_x_at						Yes, but >10% FDR	0.037075	113.836	142.91	65.796	-6	115.22	110.43	121.77	84.51	134.55	110.2	112.83	147.54	139.39	149.4	136.05	150.54	126.94
206191_at						Yes, but >10% FDR	0.043049	67.474	74.486	65.796	-6	69.5	63.08	68.26	66.12	73.77	66.21	66.86	77.6	70.13	75.11	75.32	72.25	77.39
206195_x_at						Yes, but >10% FDR	0.042743	71.832	83.837	14864.4	-6	69.01	69.12	73.26	71.31	65.98	76.37	67.51	72.45	74.34	74.7	73.47	72.71	84.45
206207_at						Yes, but >10% FDR	0.028442	72.342	87.985	13124.4	-6	75.33	70.03	65.71	72.91	73.11	73.21	70.57	70.03	77.55	78.79	69.5	74.91	88.4
206217_at						Yes, but >10% FDR	0.016324	94.622	107.849	40.046	-0.6	97.88	94.55	93.31	99.25	91.01	103.9	99.25	107.41	103.68	100.92	107.41	111.2	107.41
206226_at						Yes, but >10% FDR	0.026827	92.065	109.827	77.64	-6	95.2	92.48	91.65	91.46	94.88	88.71	87.18	109.29	105.64	108.61	131.05	102.32	102.04
206238_s_at	Yes	208.829	416.634	29844	-14.6923	Yes, but >10% FDR	0.0015847	208.151	311.665	17444.4	-6	199.47	189.62	194.55	205.5	212.01	210.84	197.13	243.37	225.97	207.22	218.58	201.69	316.71
206249_at						Yes, but >10% FDR	0.043178	71.084	81.412	108.105	1.2	79.85	80.45	77.71	91.08	77.17	81.4	77.98	77.12	72.2	71.16	76.27	66.03	72.45
206255_at						Yes, but >10% FDR	0.038407	71.814	84.325	2.402	6.3	79.81	89.57	81.06	85.92	67.84	83.17	74.23	72.05	69.02	69.07	69.94	75.95	66.53
206273_at						Yes, but >10% FDR	0.026755	87.839	108.308	1124.37	-6	87.41	90.26	84.39	94.03	97.14	73.98	90.57	89.14	88.59	97.82	109.44	97.68	115.92
206276_at						Yes, but >10% FDR	0.019247	77.496	91.021	764.367	1.2	90.77	97.34	90.32	95.41	80.67	90.89	94.16	87.91	86.4	84.62	78.09	74.13	80.45
206281_at	Yes	71.5716	414.331	199988	-1.64989	Yes, but >10% FDR	0.0054666	71.866	84.973	12704.4	-6	71.05	70.57	74.8	72.71	73.47	73.87	68.03	66.76	71.7	74.08	70.42	74.34	85.98
206291_at						Yes, but >10% FDR	0.02952	11222.3	12134.5	209.592	6.3	11768.7	12018.8	12980	12348.1	12110.8	11601.3	11944	12228.8	10975.5	11190.6	11577.2	11198.4	11323.2
206300_s_at						Yes, but >10% FDR	0.045652	67.746	73.633	524.367	-3.6	70.47	64.04	73.57	65.98	66.17	69.5	66.03	67.6	69.12	73.36	73.67	73.67	74.13
206310_at						Yes, but >10% FDR	0.017604	70.831	77.196	177.621	-0.9	71.74	73.72	72.25	67	70.67	70.52	73.57	72.81	76.06	75.37	74.59	78.74	76.9
206322_at						Yes, but >10% FDR	0.03515	73.549	81.609	4484.37	-1.8	71.94	69.74	74.08	73.26	73.77	76.53	78.19	72.15	70.91	73.67	77.44	78.9	81.86
206338_at	yes	78.142	129.316	15212.1	-8.47764	Yes, and meet 10%FDR	0.00026912	77.492	125.678	15404.4	-6	79.5	88.1	77.82	85.51	74.08	83.98	77.76	75.53	74.29	74.54	68.45	79.56	129.16
206340_at	yes	192.458	244.296	82.8356	51.4872	Yes, and meet 10%FDR	0.0012779	192.312	245.387	77.64	6.3	238.8	248.83	245.06	264.11	216.47	239.69	258.14	191.21	204.22	199.33	198.78	177.66	182.66
206345_s_at						Yes, but >10% FDR	0.046151	108.446	120.107	108.105	6	114.77	122.53	122.28	117.87	125.63	111.66	128.53	112.75	110.43	106.74	110.58	113.06	98.5
206362_x_at	Yes	97.6049	43676.8	71105.2	-8.9155	Yes, but >10% FDR	0.010282	97.605	116.771	18644.4	-6	103.84	94.75	103.47	96.34	97.61	96.27	100.57	99.18	91.33	95.94	97.61	94.35	117.46
206382_s_at						Yes, but >10% FDR	0.049986	116.963	140.577	5684.37	-6	120.44	108.08	116.65	129.7	117.62	117.13	119.1	109.36	109.82	132.33	114.56	143.51	136.62
206385_s_at						Yes, but >10% FDR	0.0025514	464.492	882.188	2744.37	0.6	867.07	960.74	858.1	905.14	769.62	898.89	846.87	883.45	743.4	738.27	595.52	719.08	475.73
206391_at						Yes, but >10% FDR	0.030546	80.6	103.788	18764.4	-6	83.32	74.49	76.27	71.9	86.1	80.17	84.21	82.6	79.84	91.08	79.29	75.64	104.4
206406_at						Yes, but >10% FDR	0.030852	84.687	97.16	177.621	-1.2	88.15	84.04	88.34	81.74	85.21	82.71	86.28	89.45	96.14	88.65	105.35	91.01	98.29
206429_at						Yes, and meet 10%FDR	0.00036508	347.943	648.535	6284.37	-1.2	331.43	377.67	323.36	367.35	348.98	281.7	386.15	378.2	416.74	364.81	455.72	507.76	645.38
206430_at	yes	86.3027	161939	2.99606e+07	-1.14528	Yes, and meet 10%FDR	0.00092402	87.224	144.326	14444.4	-6	86.43	87.37	82.65	77.23	89.08	83.98	78.19	87.49	92.48	93.44	106.89	92.35	147.34
206436_at	yes	66.5052	279.531	495642	-0.813521	Yes, and meet 10%FDR	0.00087603	66.687	85.47	9524.37	-1.8	70.11	64.18	66.35	68.97	68.4	66.72	63.16	63.34	65.98	70.47	70.47	74.44	86.34
206441_s_at						Yes, but >10% FDR	0.024595	726.525	1072.47	4364.37	0.6	1046	1140.93	1151.26	974.15	960.07	1148.07	1071.19	963.41	1009.9	933.82	995.31	895.78	713.61
206452_x_at						Yes, but >10% FDR	0.020017	151.748	168.382	247.319	2.1	176.98	165.08	170.54	161.79	159.01	177.54	168.43	164.28	156.72	151.27	157.04	154.77	143.81
206463_s_at	Yes	73.4658	660.291	287243	-1.67584	Yes, but >10% FDR	0.002765	73.605	85.988	13484.4	-6	73.72	74.59	72.66	74.65	78.41	72.2	71.7	70.72	71.75	73.82	74.49	75.37	86.52
206475_x_at	Yes	68.1592	1283.64	47426	-9.77897	Yes, but >10% FDR	0.010255	68.484	81.164	19184.4	-6	68.99	63.78	68.69	69.41	66.07	70.72	67.65	68.88	68.74	67.56	72.71	64.71	81.8
206501_x_at	yes	111.279	838.386	75679	-2.5279	Yes, and meet 10%FDR	0.00087028	111.546	171.666	15044.4	-6	110.94	109.36	105.42	99.39	103.04	103.82	112.91	129.34	121.1	115.52	113.85	115.28	175.34
206506_s_at	Yes	89.95	98.8483	-6357.79	1	No		87.55	102.74	2684.37	0.6	99.07	118.19	98.84	90.76	114.4	103.54	98.5	98.22	100.78	97.82	92.67	94.16	89.95
206508_at						Yes, but >10% FDR	0.034126	121.53	134.597	127.564	6.3	130.09	139.2	132.33	129.16	134.64	138.05	142.02	128.89	119.18	124.07	119.26	108.61	130.78
206516_at						Yes, but >10% FDR	0.025148	75.537	85.799	55.76	6.3	84.2	93.31	77.12	88.16	83.23	90.2	84.45	72.66	80.34	72.15	75.22	75.06	76.59
206527_at						Yes, but >10% FDR	0.046826	81.529	98.032	6584.37	-6	80.42	74.34	80.95	73.72	86.82	87.49	74.59	79.07	84.57	89.64	79.89	97.14	96.47
206549_at	Yes	1160.26	1682.78	729.383	0.569449	Yes, but >10% FDR	0.0076241	1154.37	1666.09	884.367	0.6	1644.26	1590.21	1833.01	1660.04	1701.98	1501.3	1718.58	1409.53	1610.17	1269.46	1424.26	1178.72	1241.61
206590_x_at						Yes, but >10% FDR	0.021189	75.158	85.007	20.655	5.1	77.06	85.45	89.08	86.82	85.81	83.75	75.11	75.9	67.04	77.92	73.62	74.44	79.12
206605_at						Yes, but >10% FDR	0.041741	66.805	77.839	18764.4	-6	68.88	71.41	66.12	65.75	65.98	66.81	63.91	67.23	70.77	70.38	64.8	64.98	77.98
206610_s_at						Yes, but >10% FDR	0.046459	74.759	84.452	3944.37	-6	77.34	69.79	67.7	78.63	76.74	74.65	76.37	77.23	77.49	75.11	77.23	86.58	83.46
206611_at	Yes	66.285	75.1475	349.918	29.9431	Yes, but >10% FDR	0.00417	66.433	75.104	291.836	6.3	72.39	73.47	73.26	79.01	79.12	72.15	74.34	77.44	67.65	66.72	63.25	66.72	68.45
206630_at						Yes, but >10% FDR	0.030445	90.561	114.604	17144.4	-6	89.04	96.94	88.95	77.55	91.01	88.28	89.82	89.08	96.8	92.35	99.53	90.2	115.28
206656_s_at						Yes, but >10% FDR	0.049135	2261.24	2533.56	17.504	0.6	2517.89	2544.21	2495.3	2493.58	2393.66	2411.98	2455.84	2305.72	2181.34	2230.27	2502.23	2296.15	2160.28
206668_s_at						Yes, but >10% FDR	0.021986	186.652	285.064	4484.37	0.9	265.83	265.95	336.63	285.83	293.46	249.52	286.03	291.43	301.29	250.38	234.59	235.4	185.85
206672_at						Yes, but >10% FDR	0.043958	109.265	123.534	11204.4	-2.1	111.39	108.53	110.66	109.36	105.71	117.62	109.82	103.04	108.84	109.06	111.66	114.8	122.96
206684_s_at						Yes, but >10% FDR	0.038834	69.482	82.385	17144.4	-6	72.33	66.03	68.17	69.65	71.26	69.26	70.67	62.21	71.61	74.44	71.41	69.07	83.06
206694_at	Yes	67.2361	88.2186	11447.9	-8.87272	Yes, but >10% FDR	0.01299	67.608	87.659	12344.4	-6	66.82	68.31	64.31	61.39	64.98	68.12	68.97	75.06	66.3	73.77	61.56	72	88.22
206697_s_at	Yes	80.2665	101.577	12987.8	-7.92128	Yes, but >10% FDR	0.0035507	80.691	99.983	14204.4	-6	79.22	75.06	82.94	81.52	78.52	82.2	83.58	83.69	74.29	84.04	77.87	82.65	101.55
206724_at	Yes	71.7263	99.1994	2922.4	0.473043	Yes, but >10% FDR	0.013847	78.306	99.892	644.367	0.6	96.62	90.01	111.66	96.8	98.56	98.29	97.41	91.33	91.33	86.76	86.58	83.98	76.74
206725_x_at	Yes	92.7759	330.845	1.72572e+06	-0.600549	Yes, but >10% FDR	0.0021367	93.546	112.025	8684.37	-2.4	89.32	92.8	92.73	93.77	98.63	88.95	90.26	96.74	96.07	96.2	95.34	104.04	111.82
206755_at	Yes	101.736	129.09	2437.68	-0.734397	Yes, but >10% FDR	0.0017649	100.869	128.983	2144.37	-0.6	106.2	107.71	100.36	91.08	104.98	98.63	105.27	104.91	107.34	110.97	118.03	120.59	125.98
206763_at	Yes	63.9089	82.8658	13360.6	-6.71261	Yes, but >10% FDR	0.0033562	63.677	81.829	13484.4	-6	65.72	63.29	62.12	66.86	58.4	70.23	62.86	61.95	63.78	65.75	62.03	66.21	82.83
206764_x_at	Yes	181.747	239.19	12705.2	-21.8282	Yes, but >10% FDR	0.0055589	180.543	237.67	16244.4	-6	181.55	185.08	180.52	183.67	169.84	176.93	184.69	180.02	205.36	186.37	165.19	182.03	239.19
206781_at	Yes	75.1059	835.452	43466.1	-9.91033	Yes, but >10% FDR	0.020128	74.788	92.843	19124.4	-6	74.23	79.18	74.23	76.16	77.65	76.74	71.9	73.87	69.26	77.98	81.29	68.78	93.83
206782_s_at						Yes, but >10% FDR	0.021124	106.364	127.174	2324.37	6.3	124.57	136.52	132.51	123.38	119.18	138.72	121.68	120.18	123.47	135.3	107.56	107.41	108.08
206785_s_at	yes	-3051.64	116.55	5.29866e+06	0.900546	Yes, and meet 10%FDR	0.00050034	87.92	116.584	10484.4	6.3	117.9	124.59	118.11	117.38	111.66	118.11	114.48	110.81	114.09	113.06	116.32	104.33	86.88
206789_s_at	Yes	120.76	149.705	-52116.8	1	No		135.16	144.895	247.319	-6	138.83	133.16	139.3	128.09	137.47	157.15	122.7	120.76	149.6	151.8	148.47	137.47	137.19
206801_at	Yes	68.0142	96.3373	29925.6	-17.2971	Yes, but >10% FDR	0.012883	67.813	81.508	19004.4	-6	71.28	68.07	66.95	67	69.36	69.55	70.08	63.12	70.96	68.64	68.26	62.9	82.48
206802_at						Yes, and meet 10%FDR	0.0010691	77.646	88.569	6584.37	-6	77.15	78.41	74.03	80.9	77.06	78.41	79.95	79.07	77.98	76.64	77.06	87.97	87.49
206805_at						Yes, but >10% FDR	0.024057	75.153	91.98	8144.37	1.8	89.53	92.86	97.55	96.34	91.84	83.69	87.43	92.22	92.35	95.74	87.06	83.29	75.27
206827_s_at						Yes, but >10% FDR	0.03233	93.829	120.382	17684.4	-6	93.86	95.21	86.16	100.71	93.25	97.55	104.47	93.51	84.21	99.25	84.62	92.09	121.35
206831_s_at	Yes	-1397.46	104.554	3.33754e+08	0.421313	Yes, but >10% FDR	0.016781	72.637	103.603	6104.37	0.9	104.59	103.04	98.91	108.16	104.04	103.82	113.38	99.87	85.45	104.26	93.7	86.04	75.22
206855_s_at						Yes, but >10% FDR	0.044037	134.025	158.528	7004.37	6.3	157.53	160.23	156.72	154.66	176.44	148.88	155.42	156.28	153.81	149.71	160.67	136.14	135.58
206896_s_at						Yes, but >10% FDR	0.023956	84.119	102.77	18164.4	-6	86.99	85.09	79.07	88.83	79.89	79.29	84.1	84.62	92.16	82.71	87.91	81.74	103.32
206901_at						Yes, but >10% FDR	0.016945	71.206	78.186	14.834	6	76.22	75.64	79.56	83.06	78.63	75.37	69.84	76	70.03	71.31	73.06	71.41	67.42
206915_at						Yes, but >10% FDR	0.020088	65.224	77.355	16004.4	-6	65.76	61.82	66.86	65.16	63.87	66.53	65.21	66.53	67.93	70.28	60.51	65.62	77.82
206922_at	Yes	102.953	546.946	35095.7	-10.6333	Yes, but >10% FDR	0.0047246	103.725	171.318	18464.4	-6	101.38	87.24	118.93	106.3	107.04	128.71	100.36	103.39	92.54	98.09	97.95	93.51	173.4
206923_at	yes	71.1043	99.0209	9980.84	-12.1314	Yes, and meet 10%FDR	0.00030969	70.671	98.864	9884.37	-6	71.36	70.86	76	75.11	73.06	64.13	71.61	74.49	70.38	68.07	67.09	85.21	99.04
206925_at	Yes	177.447	323.317	6445.04	2.39868	Yes, but >10% FDR	0.0078075	185.307	324.582	5924.37	2.7	313.99	278.78	329.24	342.27	381.36	270.41	362.79	327.42	309.12	314.08	300.25	214.38	181.4
206955_at	yes	76.9591	91.46	8940.16	-17.6687	Yes, and meet 10%FDR	0.00068544	76.934	91.666	7364.37	-6	76.46	79.51	73.47	77.76	77.44	77.98	79.4	77.06	72	79.78	75.69	89.7	91.46
206987_x_at						Yes, but >10% FDR	0.022761	84.31	92.864	2.402	6.3	86.58	97.01	95.94	92.6	81.91	80.62	82.25	84.57	87.24	87.18	83.23	87.06	85.45
206990_at	Yes	67.9731	115.33	33237.5	-7.97524	Yes, but >10% FDR	0.0039532	67.679	82.063	17204.4	-6	66.53	72.2	65.84	65.3	68.93	66.81	67.32	66.44	72.45	69.17	67.32	67.37	82.48
206994_at	Yes	-33859.5	132.274	3.44829e+07	0.960578	Yes, but >10% FDR	0.0015751	95.268	131.148	11744.4	6.3	137.45	136.43	126.06	137.28	139.97	123.73	128.18	130.51	133.99	126.5	125.28	121.68	92.67
206998_x_at	Yes	64.188	81.5006	1408.34	-78.6345	Yes, but >10% FDR	0.0050038	63.58	81.137	1964.37	-6	65.79	60.46	70.23	62.29	66.12	59.38	60.17	72.76	62.21	62.47	81.69	76.48	86.52
207004_at	Yes	67.6716	265.562	35318.5	-9.77075	Yes, but >10% FDR	0.0055866	65.428	99.619	17144.4	-6	69.39	64.85	63.12	78.96	66.86	68.31	73.67	64.67	63.34	63.03	71.41	64.45	101.06
207011_s_at						Yes, but >10% FDR	0.022844	70.631	79.122	404.367	-6	75.3	70.47	71.21	65.16	69.84	73.98	69.36	68.36	73.72	81.86	77.44	83.06	74.59
207020_at	yes	102.781	239319	8.18351e+07	-1.04862	Yes, and meet 10%FDR	0.00061947	103.599	161.205	11504.4	-6	100.78	100.71	102.25	99.04	104.4	100.43	92.48	109.06	106.6	123.81	100.01	120.93	162.92
207051_at	Yes	78.8669	93.0767	41.3792	-14.4205	Yes, but >10% FDR	0.006771	78.806	93.401	40.046	-6	82.05	74.08	82.37	75.74	84.16	74.8	85.75	96.2	92.99	98.22	95.08	92.16	83.81
207065_at						Yes, but >10% FDR	0.034145	69.049	77.281	91.615	-6	73.74	73.06	67.84	63.91	73.93	66.95	68.78	76	78.63	74.65	81.29	75.95	77.17
207072_at						Yes, but >10% FDR	0.018932	94.777	112.652	3224.37	-1.8	97.65	85.87	96.6	100.71	99.53	87.79	96.87	87.49	92.8	100.43	102.47	111.82	111.35
207079_s_at	Yes	671.617	976.611	1739.42	0.662224	Yes, but >10% FDR	0.015898	673.912	971.506	1904.37	0.6	910.03	1012	1109.74	846.29	929.3	1039.73	989.12	877.95	884.06	865.87	813.5	707.7	727.09
207081_s_at						Yes, but >10% FDR	0.037397	157.664	192.494	127.564	1.5	187.59	181.27	179.27	212.9	188.18	200.85	184.18	173.4	169.37	153.06	161.9	181.02	140.36
207088_s_at						Yes, but >10% FDR	0.019956	1077.01	1205.99	40.046	6.3	1178.62	1201.82	1146.48	1228.77	1178.72	1301.54	1141.73	1045.52	1092.18	1097.5	1118.23	1117.45	991.18
207093_s_at	Yes	73.4706	85.4542	135.384	-10.6844	Yes, but >10% FDR	0.0077915	73.859	86.085	150.526	-6	77.88	73.01	71.51	67.37	76.96	72.76	74.8	76.74	92.09	83	79.56	85.98	86.64
207094_at						Yes, but >10% FDR	0.036356	73.965	87.095	11684.4	-6	78.1	79.45	74.03	70.67	73.47	74.91	71.46	75.69	67.93	75.37	76.32	77.65	87.61
207108_s_at						Yes, but >10% FDR	0.024299	128.679	149.821	464.367	5.1	146.33	156.82	138.91	150.12	146.63	160.12	146.73	150.54	144.61	128.89	123.64	143.91	117.05
207126_x_at						Yes, and meet 10%FDR	0.00060146	9088.24	11073.5	13424.4	6.3	11287.5	11625.5	11190.6	11221.7	10839.4	10914.8	11144.2	11159.6	11051.9	10862	10587	10809.4	8939.63
207133_x_at						Yes, but >10% FDR	0.025538	65.308	77.854	7784.37	-4.2	72.19	66.95	62.03	69.41	65.8	66.26	59.8	63.47	66.76	64.76	65.71	74.59	78.03
207136_at	Yes	62.9644	6829.39	169054	-2.99693	Yes, but >10% FDR	0.0045182	63.482	98.101	16064.4	-6	63.97	64.09	66.21	69.5	65.16	48.2	55.45	60.88	68.26	61.65	69.79	63.87	100.78
207168_s_at	Yes	3372.79	4150.07	11858.5	1.09713	Yes, but >10% FDR	0.0038283	3566.76	4155.28	6524.37	1.5	4123.22	4070.53	4079	4371.76	4059.26	4187.87	4104.53	4090.33	4311.58	4020.06	3992.29	3808.48	3575.68
207176_s_at						Yes, but >10% FDR	0.004678	76.489	90.295	464.367	-5.7	77.42	74.34	79.73	73.93	79.12	77.23	68.88	83.29	79.62	92.48	89.26	96.6	87
207180_s_at	yes	2851.1	3285.22	46.8383	16.444	Yes, and meet 10%FDR	0.00041833	2851.1	3294.86	55.76	6.3	3180.42	3308.59	3299.43	3333.91	3222.58	3366.42	3238.25	2770.63	2951.02	2959.22	2848.53	2928.61	2648.57
207183_at						Yes, but >10% FDR	0.047025	107.669	122.037	91.615	-6	113.24	109.06	111.12	97.61	113.38	105.71	102.04	121.01	125.19	120.93	121.01	130.69	109.21
207209_at						Yes, but >10% FDR	0.019598	76.516	91.505	3344.37	-0.9	80.98	72.76	78.96	67.6	75.74	77.12	78.79	79.67	80.9	77.92	83.87	88.16	89.7
207233_s_at	Yes	188.84	206.306	-1914.7	1	No		202.801	221.362	6.484	6.3	212.29	209.82	237.21	223.48	219.79	198.78	214.08	188.84	205.36	221.32	195.09	205.36	194.96
207239_s_at						Yes, but >10% FDR	0.018904	173.827	205.326	91.615	6.3	207.25	188.45	220.1	197.13	230.56	194.82	212.01	177.91	183.55	167.85	177.05	181.4	155.2
207244_x_at	yes	84.0262	163.994	29980.2	-4.41997	Yes, and meet 10%FDR	8.9789e-05	83.635	121.094	15704.4	-6	87.1	84.51	81.35	79.73	86.1	81.06	82.48	90.82	88.16	84.86	78.03	84.74	124.07
207248_at						Yes, but >10% FDR	0.030563	67.13	75.405	291.836	-5.1	72.15	63.96	69.26	69.65	65.53	62.21	71.36	65.75	73.16	74.7	79.12	73.41	74.54
207278_s_at	Yes	72.3136	85.45	9821.71	-36.239	Yes, but >10% FDR	0.0099823	72.447	84.889	8804.37	-6	71.82	72.5	69.21	69.07	73.06	73.01	75.95	78.52	69.55	73.21	69.55	80.95	85.45
207280_at	Yes	65.1298	309.68	75501	-2.89837	Yes, but >10% FDR	0.0067387	65.075	79.809	15584.4	-6	64.91	61.01	66.95	68.12	68.55	60.51	62.64	65.03	68.07	63.69	67.14	65.66	80.9
207282_s_at	Yes	101.848	5089.06	276872	-2.24738	Yes, but >10% FDR	0.014442	101.676	133.304	13964.4	-6	101.69	93.51	110.97	109.21	100.43	104.26	108.68	89.2	96.6	107.34	98.16	105.27	135.39
207309_at	Yes	76.857	101.69	3353.29	-16.541	Yes, but >10% FDR	0.0016975	76.534	100.882	3344.37	-6	77.52	69.12	74.91	72.61	84.27	75.06	76.32	87.91	76	74.85	88.65	101.62	101.76
207313_x_at	Yes	71.31	78.2841	-4956.67	1	No		69.982	81.154	5444.37	0.9	81.23	76.74	72.66	78.79	82.94	92.09	80.62	81.57	78.79	76.64	78.79	74.49	71.31
207316_at						Yes, but >10% FDR	0.042616	74.667	93.46	19544.4	-6	75.94	74.34	75.48	73.41	81.8	70.23	80.84	72.71	81.57	68.69	72.45	69.89	93.57
207321_s_at						Yes, but >10% FDR	0.0020956	87.653	106.224	6344.37	-6	92.24	88.34	86.28	85.81	90.89	82.83	91.46	89.51	85.98	91.08	83.52	106.67	103.11
207330_at						Yes, but >10% FDR	0.039962	63.047	75.191	127.564	-6	69.3	63.78	62.38	59.51	68.55	58.4	60.25	68.07	76.69	67	86.04	79.78	70.77
207334_s_at	Yes	-1060.61	434.423	2.3408e+06	0.454008	Yes, but >10% FDR	0.0029799	248.827	429.912	4604.37	0.9	402.26	413.29	424.02	482.71	487.07	391.26	427.57	418.19	384.81	398.38	357.3	325.84	250.56
207351_s_at						Yes, but >10% FDR	0.020447	65.09	71.651	20.655	-6	66.71	61.1	64.49	64.45	68.31	65.48	73.41	73.31	69.5	74.75	75.85	69.12	68.36
207391_s_at	Yes	581.398	843.361	10177.5	-12.9845	Yes, but >10% FDR	0.0086772	577.512	852.579	10424.4	-6	553.67	568.49	527.86	603.41	580.44	532.26	545.71	644.93	708.68	568.1	561.83	697.48	843.36
207404_s_at						Yes, but >10% FDR	0.034791	97.325	110.827	4064.37	-6	98.2	98.22	92.86	90.64	99.53	90.13	105.42	99.32	97.28	101.9	100.43	112.52	110.05
207409_at	Yes	59.43	77.6423	-53405.6	1	No		62.674	68.488	2204.37	6.3	67.48	64	66.07	60.38	68.4	70.13	65.57	67.37	68.17	80.56	60.59	59.43	67.37
207420_at	Yes	73.72	84.7002	-49120.9	1	No		77.229	81.776	0.459	-6	80.21	73.72	80.11	82.37	79.67	91.9	79.95	78.41	79.84	78.85	86.64	77.82	80
207427_at	Yes	96.1256	240.414	36872.8	-8.36099	Yes, but >10% FDR	0.017795	96.531	117.135	17564.4	-6	93.59	96	102.39	96.74	103.61	99.11	90.51	99.39	93.96	94.42	88.52	95.27	117.95
207438_s_at	yes	293.854	474.018	6102.94	1.1937	Yes, and meet 10%FDR	6.2041e-05	300.998	474.894	5504.37	1.2	456.6	499.04	486.06	506.35	454.14	476.06	454.14	466.91	453.2	454.14	424.61	349.46	320.68
207459_x_at						Yes, but >10% FDR	0.031196	75.545	84.544	4184.37	-0.6	76.31	72.96	75.48	77.23	73.06	79.73	75.79	77.76	76.27	79.56	78.03	79.89	84.74
207466_at						Yes, but >10% FDR	0.025041	87.328	98.892	524.367	-6	87.97	91.96	88.46	91.01	90.13	81.57	88.03	81.8	88.65	103.25	93.31	95.08	105.35
207467_x_at						Yes, but >10% FDR	0.039474	1718.76	2011.11	1.239	6.3	1869.08	2004.46	2124.64	1784.12	1656.59	1776.72	1784.12	1716.2	1917.49	1786.6	1612.41	1660.04	1583.61
207468_s_at	Yes	73.9992	96.6187	29555.7	-40.0392	Yes, but >10% FDR	0.013146	74.067	88.157	18764.4	-6	75.21	75.27	72.86	79.78	72.71	70.03	74.18	73.01	75.06	77.65	70.82	71.41	88.59
207476_at	Yes	75.9974	278.072	35481.6	-9.40031	Yes, but >10% FDR	0.001709	75.948	108.962	17564.4	-6	75.74	72.55	75.85	86.88	72.81	78.68	75.01	77.82	81.63	73.16	68.17	73.67	110.58
207479_at	Yes	67.48	74.2867	1.57788	18.9358	Yes, but >10% FDR	0.016587	67.755	74.694	1.725	6	71.1	75.17	76.59	72.4	65.8	67.18	67.42	67.79	71.66	68.69	67.51	67.98	63.29
207482_at						Yes, but >10% FDR	0.029246	76.551	95.895	19184.4	-6	78.67	81.23	78.19	72.91	79.23	82.14	74.49	78.58	71.66	82.94	73.36	69.5	96.94
207485_x_at						Yes, but >10% FDR	0.040984	84.06	91.048	0.89	-6	87.64	83.29	81.8	94.94	87.24	88.34	90.7	90.51	93.51	92.54	92.03	88.83	92.09
207493_x_at						Yes, but >10% FDR	0.049105	66.786	77.979	18644.4	-6	64.85	68.5	64.13	62.34	67.93	69.21	68.03	70.38	71.51	63.6	66.95	65.16	78.36
207504_at	yes	81.5009	107.681	15866.8	-6.46819	Yes, and meet 10%FDR	0.0010495	81.658	105.644	15404.4	-6	83.83	82.2	80.56	88.4	82.42	83.92	77.76	77.39	83.52	80.5	76	82.77	107.26
207507_s_at	Yes	8687.93	9724.48	6771.12	1.08109	Yes, but >10% FDR	0.0025588	8977.6	9730.34	2744.37	6.3	9592.34	9581.26	9912.27	9762.26	9567.99	9634.54	9912.27	9782.58	9647.91	9802.95	9140.14	9267.73	8804.35
207508_at						Yes, but >10% FDR	0.02107	5520.73	5924.37	524.367	6.3	5986.74	5788.61	5776.58	5938.98	5849.1	6135.65	5943.1	5841	5906.14	5304.5	5572.08	5378.54	5780.59
207525_s_at	Yes	228.841	305.071	10368.4	-10.8471	Yes, but >10% FDR	0.0015074	229.707	303.012	10664.4	-6	231.5	212.75	219.18	234.92	250.21	210.55	225.82	241.35	234.1	231.84	225.03	259.57	305.07
207555_s_at	yes	76.8738	458.375	51374.9	-4.5193	Yes, and meet 10%FDR	0.0013645	76.619	105.859	16124.4	-6	79.04	68.17	77.01	77.87	78.9	75.06	77.17	85.39	72	75.32	79.73	77.06	107.71
207556_s_at						Yes, but >10% FDR	0.0036863	93.212	108.115	40.046	6.3	100.4	104.62	107.71	118.11	108.46	109.36	100.43	90.95	93.31	92.86	89.88	97.01	95.27
207608_x_at						Yes, but >10% FDR	0.032621	113.507	128.255	77.64	-2.4	116.81	111.66	119.84	109.97	119.1	106.37	117.13	124.16	125.37	132.51	120.59	141.44	125.45
207616_s_at						Yes, but >10% FDR	0.022054	1129.89	1526.04	13484.4	-6	1052.55	1176.27	1228.77	1227.92	1221.13	1165.72	1038.29	958.08	1122.11	1143.31	988.43	1185.27	1553.17
207620_s_at						Yes, but >10% FDR	0.01129	158.122	188.137	5924.37	6.3	184.89	198.78	197.4	189.76	196.86	176.07	183.67	180.14	184.95	184.82	199.33	150.96	162.13
207634_at	yes	70.1141	273.595	35813.7	-9.49249	Yes, and meet 10%FDR	0.0011011	69.115	100.715	17564.4	-6	73.4	69.5	69.7	80.9	66.49	72.5	70.62	67.04	66.76	68.5	68.64	67.32	102.04
207636_at	yes	74.5766	22909.4	58383.9	-10.274	Yes, and meet 10%FDR	0.00063139	74.971	97.293	17684.4	-6	75.73	74.65	74.75	73.82	79.89	75.22	74.44	76.21	75.64	67.37	74.54	72.66	98.98
207665_at						Yes, but >10% FDR	0.049833	74.832	82.761	1964.37	-6	74.44	74.75	72.35	70.52	79.01	73.06	75.53	80.17	77.01	73.67	83.58	79.29	84.68
207671_s_at	yes	72.636	88.3467	12426	-7.02252	Yes, and meet 10%FDR	0.00036638	72.531	87.248	12644.4	-6	72.71	71.7	73.72	69.31	73.87	71.8	72.86	75.48	75.37	70.96	71.21	75.37	88.34
207681_at	Yes	70.3572	83.4969	6746.27	-4.13041	Yes, but >10% FDR	0.0016616	70.574	83.351	6884.37	-4.5	67.98	73.87	69.6	70.28	66.3	73.01	71.95	68.45	68.74	73.47	70.96	81.35	83.46
207699_at	yes	104.685	435.134	36406.9	-8.47505	Yes, and meet 10%FDR	0.00034804	104.424	154.957	16604.4	-6	103.5	113.06	99.59	99.87	100.99	111.12	95.54	102.54	105.49	116	104.91	103.61	158.35
207714_s_at	Yes	853.81	981.873	106.13	14.2407	Yes, but >10% FDR	0.016121	851.959	977.651	91.615	6.3	949.19	866.47	997.38	1046.97	990.49	1014.81	1007.8	867.07	824.29	890.83	888.36	849.81	815.76
207718_x_at	Yes	92.491	127.965	1262.16	-125.598	Yes, but >10% FDR	0.0076178	90.917	128.403	2024.37	-6	92.08	89.26	87.49	86.4	121.18	85.04	87.85	93.96	91.77	89.88	128.09	120.26	135.67
207721_x_at						Yes, but >10% FDR	0.024647	12663.8	13803.8	40.046	6.3	13445	13959.9	14322.5	13363.4	13578.2	14135.1	13106.5	12704	12810.1	13070.3	13381.9	12339.5	11952.3
207726_at						Yes, but >10% FDR	0.046769	76.167	86.374	40.046	6.3	80.88	87.43	88.46	89.39	79.29	90.13	81.97	70.13	78.25	78.74	79.84	70.96	79.62
207734_at	Yes	62.3001	1146.21	3.26875e+06	-0.927139	Yes, but >10% FDR	0.012621	62.869	75.568	10844.4	-6	64.61	66.12	57.44	63.6	60.05	58.85	61.18	64	66.39	62.99	62.55	67.7	76.11
207739_s_at						Yes, but >10% FDR	0.022157	79.024	95.153	16604.4	-6	80.27	78.41	77.87	81.91	75.37	76.96	83.23	77.28	79.23	87.31	76.85	79.62	95.01
207746_at						Yes, but >10% FDR	0.020666	102.669	117.798	247.319	-4.8	104.26	105.57	99.87	101.34	107.49	105.27	97.41	103.04	115.6	121.1	104.18	118.36	122.96
207747_s_at						Yes, but >10% FDR	0.0125	191.91	257.901	3524.37	0.6	259.41	253.88	245.23	282.87	249.86	259.93	256.18	231.04	258.32	223.79	235.57	223.48	191.87
207761_s_at						Yes, but >10% FDR	0.036862	89.767	114.33	7304.37	1.2	115.72	114.56	109.06	116.57	100.99	110.43	114.64	116.08	117.54	115.92	101.34	104.47	90.57
207767_s_at	Yes	67.1342	202.055	36968.6	-9.49286	Yes, but >10% FDR	0.0074762	67.145	83.1	19004.4	-6	67.44	68.36	69.26	74.13	65.8	66.67	63.65	68.07	67.65	64.36	66.53	63.69	83.46
207774_at	Yes	82.8442	9107.07	47762	-11.9814	Yes, but >10% FDR	0.0067764	82.898	115.355	19064.4	-6	82.14	83.63	83.63	77.98	85.51	83.63	76.21	88.77	78.68	87.49	93.7	72.76	117.05
207782_s_at	Yes	425.575	539.665	3321.29	22.4236	Yes, but >10% FDR	0.0071966	423.923	538.357	3344.37	6.3	535.35	576.03	556.41	566.13	540.44	468.86	553.33	528.59	522.76	548.75	480.37	404.5	446.65
207783_x_at	Yes	22754.8	24705.5	9075.09	696.144	Yes, but >10% FDR	0.0067414	22567.5	24722.5	6824.37	6.3	24887.1	24204.7	25638.1	24679.1	25058.3	24288.7	24954.3	24440.7	24799.1	23838.4	24971.6	22709.4	22756.6
207784_at	yes	74.9966	168.552	34782.8	-4.00472	Yes, and meet 10%FDR	0.00042598	74.545	106.331	15644.4	-6	75.21	75.06	76.53	70.77	78.14	74.75	71.26	77.06	84.1	71.46	70.52	75.74	108.31
207790_at						Yes, but >10% FDR	0.0041625	86.035	111.295	4124.37	-0.6	85.88	83.23	89.39	86.34	84.27	84.33	88.22	90.2	97.48	95.01	88.22	104.47	108.16
207799_x_at	Yes	98.6297	1912.26	57915.8	-6.81369	Yes, but >10% FDR	0.0093498	98.675	117.913	17144.4	-6	97.1	95.01	95.94	102.82	93.05	101.76	95.8	99.11	97.55	105.71	101.83	97.88	118.77
207825_s_at						Yes, but >10% FDR	0.010296	69.474	87.299	7664.37	-6	71.56	69.65	74.44	62.55	69.65	68.03	78.14	70.57	65.66	65.62	68.45	84.39	86.46
207826_s_at						Yes, and meet 10%FDR	0.0006081	473.194	1031.29	7784.37	1.2	1035.58	1133.05	1065.27	1130.7	1017.63	969.43	1030.41	974.15	933.82	971.45	849.81	812.94	453.2
207827_x_at	Yes	102.068	843.478	41537.1	-9.57596	Yes, but >10% FDR	0.01449	102.186	132.313	18584.4	-6	102.88	93.51	99.87	103.82	105.79	109.9	113.77	93.51	104.98	101.83	98.02	96.94	133.44
207831_x_at						Yes, but >10% FDR	0.042692	745.865	879.37	3164.37	6.3	877.82	942.27	902.01	902.01	865.87	886.51	853.95	838.11	790.71	933.17	801.75	716.09	790.71
207836_s_at						Yes, but >10% FDR	0.033045	87.457	100.594	209.592	6.3	106.11	94.62	98.77	107.19	99.94	97.34	91.84	103.04	85.92	95.08	78.96	86.82	86.58
207863_at	Yes	68.8124	265.723	64930.9	-3.03295	Yes, but >10% FDR	0.012592	69.165	85.165	16604.4	-6	69.99	65.84	64.27	72.91	68.88	63.69	67.88	70.96	72.25	66.72	73.93	69.12	86.1
207873_x_at						Yes, but >10% FDR	0.035839	71.553	78.483	108.105	-0.6	71.05	72.05	71.51	74.85	67.98	77.17	73.41	73.31	77.28	77.98	75.69	78.36	79.18
207877_s_at	Yes	-134599	202.582	2.01608e+08	0.862423	Yes, but >10% FDR	0.012506	135.444	201.462	11984.4	5.7	209.14	206.64	173.16	219.18	213.19	197.95	212.9	199.05	188.97	201.41	184.18	184.18	133.53
207891_s_at	Yes	75.8739	216.9	119498	0.298427	Yes, but >10% FDR	0.0078494	162.079	214.554	764.367	0.6	215.77	208.95	203.66	227.07	221.63	210.26	197.13	202.39	179.77	188.05	202.25	159.9	161.9
207895_at						Yes, but >10% FDR	0.02193	67.615	79.431	16604.4	-6	65.72	66.58	67.79	66.44	73.26	71.61	66.58	69.99	66.63	68.12	67.51	68.03	79.29
207908_at	Yes	64.8683	74.09	44.1135	-18.4969	Yes, but >10% FDR	0.0040011	65.319	74.091	55.76	-5.7	65	69.55	64.85	60.97	66.81	62.03	66.9	74.75	71.85	75.06	78.25	73.57	71.06
207922_s_at						Yes, but >10% FDR	0.012575	497.25	720.877	11384.4	6.3	730.8	789.06	747.02	750.13	659.4	733.68	729.62	636.93	768.02	663.98	692.18	651.22	486.06
207929_at						Yes, but >10% FDR	0.017839	107.611	120.747	47.254	-6	104.47	108.91	110.2	105.71	113.38	105.35	111.04	126.85	115.92	111.89	118.36	126.85	123.13
207945_s_at						Yes, but >10% FDR	0.019647	891.803	1090.13	3.344	6.3	1014.89	1083.14	1032.55	1248.52	920.33	965.41	962.74	853.95	857.5	879.78	859.29	933.17	780.9
207949_s_at						Yes, but >10% FDR	0.039892	190.624	218.502	12164.4	-6	200.62	187.27	195.36	193.88	200.58	185.98	182.28	194.42	181.4	178.4	190.28	197.4	219.79
207957_s_at	Yes	67.0527	92.1003	30445.8	-11.4766	Yes, but >10% FDR	0.013268	67.253	78.182	19544.4	-6	65.93	66.63	71.26	65.71	69.94	64.8	66.86	66.39	67.28	67.56	68.93	63.34	78.52
207965_at	Yes	74.0558	197.838	37027.3	-8.86646	Yes, but >10% FDR	0.01133	73.584	89.926	17684.4	-6	75.79	78.96	72.86	79.45	75.79	75.58	71.75	71.46	71.36	73.67	69.65	72.35	90.64
207966_s_at						Yes, but >10% FDR	0.011623	2431.09	2692.8	33.937	6.3	2615.53	2635.75	2635.75	2707.98	2661.46	2900.33	2509.18	2410.3	2471.21	2349.28	2378.77	2561.9	2467.78
207969_x_at						Yes, but >10% FDR	0.019716	86.666	98.395	47.254	-6	89.19	81.4	87.79	89.2	87.97	84.45	89.95	98.63	102.82	102.68	92.6	89.64	103.68
207976_at						Yes, but >10% FDR	0.031492	91.766	106.102	9824.37	-2.7	93.39	93.18	91.77	87.18	89.08	90.13	89.14	98.02	97.14	86.58	93.38	98.84	105.79
207988_s_at						Yes, but >10% FDR	0.036024	2979.34	3302.07	2.402	6.3	3258.77	3224.81	3290.29	3446.7	2747.68	2936.74	2858.42	2882.29	2990.15	2988.07	3189.25	2920.5	3191.46
207991_x_at						Yes, but >10% FDR	0.029342	75.685	85.399	150.526	-6	76.26	73.26	77.92	70.96	76.27	75.22	77.06	77.76	87.91	78.09	85.81	90.7	80
208005_at	Yes	62.5533	88.8852	24062.8	-2.27827	Yes, but >10% FDR	0.015396	62.901	78.358	12884.4	-6	62.62	64.36	65.44	61.05	56.26	64.31	62.6	69.31	59.34	59.76	63.38	65.66	78.96
208021_s_at						Yes, but >10% FDR	0.027516	164.883	193.978	108.105	6	178.82	203.23	203.52	187.92	193.21	184.95	217.67	176.44	165.19	180.52	167.85	142.32	158.68
208058_s_at	Yes	70.2955	3062.56	61899.1	-7.32854	Yes, but >10% FDR	0.014899	70.171	84.292	17144.4	-6	71.37	73.67	65.39	71.01	67.74	73.06	74.91	70.67	66.49	67.84	71.56	69.84	85.04
208060_at						Yes, but >10% FDR	0.020761	69.521	84.774	18044.4	-6	67.68	67.79	65.89	71.9	69.31	70.52	70.82	75.95	62.16	68.97	70.82	68.26	85.27
208074_s_at	Yes	-1.85516e+07	3606.3	6.05824e+08	1.01912	Yes, but >10% FDR	0.0035385	2885.72	3583.38	11324.4	6.3	3539.51	3673.65	3701.77	3546.06	3422.89	3630.62	3816.41	3451.48	3745.65	3473.08	3543.6	3364.09	2844.58
208093_s_at						Yes, but >10% FDR	0.015301	457.821	517.746	944.367	6	534.85	537.08	478.04	512	509.17	543.07	510.23	495.93	528.95	474.74	475.4	449.13	451.32
208097_s_at						Yes, but >10% FDR	0.038229	1049.86	1423.15	3944.37	6.3	1361.52	1220.28	1716.2	1462.28	1415.41	1262.44	1435.16	1496.11	1367.19	1491.97	1325.21	1000.84	1069.71
208100_x_at	Yes	81.6438	3427.88	56495.5	-7.74642	Yes, but >10% FDR	0.011535	81.218	105.291	16724.4	-6	81.36	73.93	85.33	84.68	81.74	91.01	82.94	78.58	77.49	76.21	85.45	81.01	106.3
208142_at						Yes, but >10% FDR	0.014022	56.542	62.3	65.796	6.3	62.44	62.47	62.9	62.16	58.89	64.94	63.38	54.8	55.25	55.72	54.91	56.34	61.65
208156_x_at						Yes, and meet 10%FDR	0.00087737	63.548	77	5024.37	-0.9	65	62.16	60.97	65.39	64.4	61.73	64.71	63.91	66.03	66.07	70.42	69.17	76.96
208172_s_at						Yes, but >10% FDR	0.031651	67.061	78.053	108.105	-6	70.36	66.3	72.25	61.44	70.57	73.16	61.44	74.34	81.97	72.4	79.84	77.6	81.4
208182_x_at	Yes	71.8029	238.478	1.69691e+07	-0.397956	Yes, but >10% FDR	0.012913	71.936	84.911	3764.37	-0.6	72.69	76.37	71.8	66.3	72.05	71.8	71.8	74.49	75.11	75.58	79.18	76.96	85.15
208186_s_at						Yes, but >10% FDR	0.038811	90.639	106.621	3104.37	-6	92.59	92.09	85.45	101.9	82.31	94.22	89.51	92.09	93.38	83.11	100.15	107.71	104.84
208195_at						Yes, but >10% FDR	0.023472	76.208	83.469	1784.37	-6	76.77	76.74	76.21	72.91	75.06	78.25	77.55	78.14	75.22	75.32	86.22	85.09	78.25
208196_x_at	Yes	82.6182	127.586	28212.9	-10.4004	Yes, but >10% FDR	0.00941	82.63	110.874	17144.4	-6	81.99	81.01	89.08	86.64	92.99	79.56	83.69	80.39	71.9	84.62	78.09	81.46	112.05
208203_x_at						Yes, but >10% FDR	0.020687	81.257	92.397	77.64	-6	85.95	81.86	83.58	75.53	80.39	83.46	74.59	93.05	96.47	92.6	92.48	93.83	83.23
208217_at						Yes, but >10% FDR	0.017972	96.167	106.647	1664.37	-6	102.3	96.14	94.68	94.48	95.8	95.67	96.2	94.94	96.94	95.94	111.2	107.34	99.87
208221_s_at						Yes, but >10% FDR	0.048805	66.252	70.476	47.254	3	71.45	68.69	68.17	69.99	72.61	70.62	68.59	66.72	63.56	66.53	65.89	66.63	69.5
208241_at						Yes, but >10% FDR	0.048095	75.761	84.24	404.367	-6	81.04	72.35	74.39	74.29	81.8	75.9	69.65	76.74	79.23	87.91	84.1	83.92	80.78
208260_at	Yes	101.344	71266.3	84136.5	-7.25434	Yes, but >10% FDR	0.0020688	100.72	139.894	16604.4	-6	100.91	95.14	101.41	110.43	105.79	97.14	98.22	94.75	98.5	99.53	113.61	100.71	141.44
208280_at						Yes, but >10% FDR	0.0018835	68.997	75.96	24.373	0.9	73.63	77.44	78.47	73.01	74.44	73.82	71.31	71.66	68.45	69.94	69.99	68.17	68.74
208285_at						Yes, but >10% FDR	0.045901	107.403	170.67	19184.4	-6	104.38	100.01	102.61	81.06	129.07	90.7	98.43	109.9	137	106.67	119.1	100.15	169.48
208292_at	yes	80.6001	107.043	11287.1	-9.22322	Yes, and meet 10%FDR	0.0010854	80.681	105.648	11924.4	-6	81.75	81.74	78.41	74.39	81.74	77.39	82.94	79.01	87.97	83.98	77.28	87.12	107.04
208293_x_at						Yes, but >10% FDR	0.02654	67.367	76.718	5024.37	-6	67.32	67.7	66.72	66.39	67.37	67.79	73.41	60.88	64.53	67.46	67.7	78.41	75.01
208303_s_at	Yes	62.9503	73.7551	4312.45	3.25941	Yes, but >10% FDR	0.0085614	62.6	73.73	4544.37	3	71.91	71.31	72.91	71.16	72.15	77.49	77.44	77.23	70.33	75.64	70.28	64	62.64
208309_s_at						Yes, but >10% FDR	0.034752	100.168	122.555	464.367	0.3	120.71	122.02	130.06	115.76	117.54	106.52	115.04	118.03	114.72	108.68	111.74	103.18	104.47
208344_x_at						Yes, but >10% FDR	0.017647	80.296	105.712	47.254	-6	85.5	84.33	81.29	61.56	91.14	82.71	86.4	114.4	93.64	97.14	108.61	103.18	117.3
208347_at						Yes, but >10% FDR	0.033628	105.013	116.168	150.526	-6	104.95	109.59	112.44	98.09	110.51	99.39	100.64	107.26	118.52	112.05	120.18	113.22	120.59
208360_s_at	Yes	73.2703	783.674	68569.6	-3.80129	Yes, but >10% FDR	0.0044079	72.614	101.146	15824.4	-6	71.7	62.94	71.26	72.61	73.52	69.41	71.95	78.03	77.6	81.97	75.06	73.67	102.68
208363_s_at						Yes, but >10% FDR	0.044782	74.271	83.619	16604.4	-6	73.51	71.66	73.67	76.48	75.27	72.25	71.01	75.95	72.05	77.55	78.19	74.34	83.92
208376_at						Yes, but >10% FDR	0.026426	65.39	84.502	14924.4	-6	64.6	61.56	64.67	62.51	73.16	61.27	59.14	71.31	68.31	66.86	69.84	66.72	85.15
208379_x_at	Yes	77.1362	2738.47	9.0416e+06	-0.839306	Yes, but >10% FDR	0.0043024	77.263	98.072	11144.4	-6	79.19	80.45	74.65	79.89	76.43	70.08	75.58	81.74	74.59	81.4	81.46	84.39	99.39
208407_s_at	Yes	1245.94	1446.41	39.389	4.52093	Yes, but >10% FDR	0.0049025	1236.87	1446.04	40.046	3.9	1408.01	1455.2	1455.2	1503.39	1427.23	1427.23	1337.2	1221.98	1164.1	1392.05	1290.76	1221.13	1186.09
208409_at						Yes, but >10% FDR	0.035573	102.341	125.374	108.105	-4.2	105.62	113.14	114.01	84.62	108.23	99.04	103.39	115.68	132.24	124.59	127.65	122.45	114.72
208417_at						Yes, but >10% FDR	0.0051423	93.075	125.737	11624.4	-3.3	90.14	90.7	96.07	91.08	92.8	84.45	82.83	93.38	105.2	94.48	99.04	104.84	126.5
208424_s_at						Yes, but >10% FDR	0.048955	351.713	411.287	77.64	6.3	387.4	394.26	413.57	383.74	408.45	398.93	463.68	347.77	388.83	336.86	363.3	324.03	354.59
208440_at						Yes, but >10% FDR	0.0082799	76.904	86.686	3644.37	-6	75.09	75.95	78.85	78.79	81.06	71.56	75.85	76.74	79.51	73.87	80.62	88.03	86.58
208450_at						Yes, but >10% FDR	0.037268	130.022	189.179	2984.37	0.6	189.46	193.07	195.77	160.9	173.53	203.38	204.36	173.53	159.34	173.65	171.37	143.31	136.05
208453_s_at	Yes	843.244	1322.16	3665.4	0.379273	Yes, but >10% FDR	0.016308	1003.56	1320.73	344.367	0.6	1229.05	1345.57	1339.98	1463.29	1156.86	1298.83	1247.65	1187.74	1121.33	1169.76	1075.66	1125.23	935.76
208457_at	Yes	70.9949	3391.95	7.25681e+06	-1.05145	Yes, but >10% FDR	0.020877	71.309	80.96	12044.4	-6	70.95	69.07	72.66	75.43	70.13	66.95	71.31	69.31	73.21	71.21	72.61	73.72	81.35
208477_at						Yes, but >10% FDR	0.015913	67.695	75.338	404.367	-3	69.12	70.62	70.47	61.48	67.23	68.83	64.4	68.45	70.67	74.96	76.69	74.34	74.08
208482_at						Yes, but >10% FDR	0.037832	65.667	78.127	19184.4	-6	65.16	70.47	67.32	68.26	68.5	62.73	66.12	61.22	66.35	68.74	64.18	61.48	78.79
208499_s_at	Yes	-1104.88	134.471	87750.5	3.24539	Yes, but >10% FDR	0.0080762	98.791	134.359	15824.4	6.3	134.06	135.39	121.68	132.7	143.51	138.81	143.61	124.41	136.43	129.97	138.81	133.16	97.55
208516_at						Yes, but >10% FDR	0.035737	68.05	79.533	3524.37	6.3	79.58	79.62	75.43	86.52	76.37	80.78	80.62	77.92	73.87	81.46	74.91	64.58	71.66
208519_x_at	Yes	19.8765	106.307	166543	0.521892	Yes, but >10% FDR	0.0018875	80.812	105.532	5024.37	1.2	104.87	106.6	111.59	108.99	97.01	109.14	100.36	107.34	103.39	99.66	97.41	89.51	81.46
208521_at						Yes, but >10% FDR	0.033685	67.277	73.977	77.64	-6	65.99	69.26	68.21	67.74	69.41	65.62	63.38	77.28	74.34	68.45	77.82	72.15	72.86
208536_s_at	Yes	61.1	66.065	-15511.8	1	No		64.616	68.499	55.76	6.3	68.97	65.8	67.74	64.89	68.07	75.11	68.5	61.1	64.71	68.69	62.03	67.65	65.03
208541_x_at						Yes, but >10% FDR	0.022295	95.609	109.519	33.937	6.3	102.64	114.8	108.99	110.66	106.89	113.14	99.11	83.69	100.92	93.83	96.8	99.32	101.27
208544_at	yes	67.6776	306.051	36144.1	-7.94156	Yes, and meet 10%FDR	7.4669e-06	67.273	108.406	16244.4	-6	67.02	72.05	63.38	66.21	72.2	70.52	67.23	65.57	68.78	67.42	64.58	67.18	111.89
208568_at	Yes	101.984	127.139	145.471	-0.72694	Yes, but >10% FDR	0.0081468	102.431	125.721	127.564	-0.9	104.59	94.35	104.55	101.06	111.51	106.08	103.97	115.04	122.53	113.46	137.66	118.36	127.47
208574_at	Yes	77.9418	87.97	9203.46	-14.3262	Yes, but >10% FDR	0.011686	77.738	87.581	7904.37	-6	77.51	72.45	79.89	80.56	77.44	77.28	79.45	76.96	78.09	81.46	76.27	85.63	87.97
208577_at						Yes, but >10% FDR	0.041397	75.929	86.141	19244.4	-6	73.81	76.85	79.56	75.43	77.87	72.81	76.11	77.44	74.23	80.45	74.96	73.11	86.34
208579_x_at	Yes	829.081	1016.67	108.494	0.661754	Yes, but >10% FDR	0.0021593	857.828	997.289	77.64	6.3	979.27	1031.84	1057.91	1031.12	907.03	996	1011.3	868.27	879.78	885.29	850.99	847.46	815.19
208581_x_at						Yes, but >10% FDR	0.037527	1348.65	1850.16	2204.37	6.3	1824.56	2052.26	1987.86	1800.27	1497.15	2129.06	1735.34	1585.81	1784.12	1883.24	1380.52	1412.47	1238.18
208591_s_at	Yes	92.54	103.528	-15780.9	1	No		94.504	105.471	0.237	-6	97.99	92.54	120.84	106.89	106.23	96.34	114.09	102.04	106.3	100.71	105.57	102.96	100.5
208623_s_at	Yes	1749.69	1915.51	39.5515	15.9434	Yes, but >10% FDR	0.01072	1745.27	1915.51	40.046	6.3	1949.05	1848.32	1906.88	1989.24	1844.48	1955.06	1806.52	1660.04	1833.01	1785.36	1751.04	1707.89	1760.78
208629_s_at						Yes, but >10% FDR	0.027059	2000.15	2201.57	108.105	6.3	2128.89	2201.09	2161.77	2204.14	2134.97	2372.18	2288.2	2057.96	1963.21	2163.27	1918.82	1985.11	1946.95
208638_at						Yes, but >10% FDR	0.0082318	6711.14	7196.74	704.367	6.3	6983.17	7092.11	7226.09	6965.45	7337.13	7281.4	7311.74	7048.01	7418.95	6695.61	6737.51	6690.97	6774.98
208639_x_at						Yes, but >10% FDR	0.015243	3899.9	4900.85	8564.37	6.3	4994.07	4921.9	5363.65	4797.28	4864.24	4830.64	5067.29	4860.87	4497.79	4463.62	4969.9	4173.38	3869.68
208640_at						Yes, but >10% FDR	0.0061862	9427.91	10199.8	65.796	4.8	10058.4	9871.13	10697.6	10297.5	10015.9	10002	10127.6	9469.02	9429.73	9641.22	9203.71	9229.26	9594.55
208645_s_at	yes	18988.7	20637.7	7611.67	2.03618	Yes, and meet 10%FDR	7.8866e-06	18985.6	20638.1	7664.37	2.1	20807	20424.3	20566.4	20637.8	20752.5	20781.3	20580.6	20723.8	20396	20680.7	20367.8	19592.3	19083
208647_at						Yes, but >10% FDR	0.04968	2019.12	2206.53	1064.37	6.3	2182.18	2117.29	2261.4	2207.2	2132.01	2413.65	2270.82	2127.58	2256.7	2107.04	2003.07	1980.98	2052.26
208649_s_at						Yes, but >10% FDR	0.026554	4775.28	5033.05	247.319	4.8	5094.69	5039.27	5014.88	5188.13	4767.44	5127.36	4966.45	5028.81	4807.26	4830.64	4760.84	4760.84	4724.68
208661_s_at						Yes, but >10% FDR	0.041593	846.442	1031.91	9764.37	6.3	1008.04	978.21	1113.59	966.08	1025.42	1023.29	1101.31	956.75	1034.7	1046.24	1036.14	931.23	846.87
208666_s_at						Yes, but >10% FDR	0.019431	209.897	281.104	8084.37	6.3	272.79	273.8	315.17	254.76	283.66	247.11	296.93	275.71	283.46	278.78	287.22	224.41	210.69
208671_at	Yes	1591.48	1895.25	3520.68	11.6346	Yes, but >10% FDR	0.0026659	1566.72	1904.36	3764.37	1.8	1898.38	1859.89	2065.11	1921.48	1891.09	1896.34	1874.12	1812.79	1901.6	1831.74	1790.32	1568.32	1614.64
208672_s_at						Yes, but >10% FDR	0.015814	7008.85	8483.1	10184.4	6.3	8259.79	8283.36	9210.09	8859.44	8629.13	8197.68	8197.68	8475.01	8387.35	8034.54	8641.1	7787.8	6965.45
208685_x_at						Yes, but >10% FDR	0.038676	1243.89	2115.44	16604.4	6.3	2219.47	2304.12	1959.13	2166.27	1819.09	2466.07	2173.79	2130.53	1841.93	2154.29	1782.89	2108.5	1229.62
208686_s_at						Yes, but >10% FDR	0.021795	292.782	466.769	4784.37	0.6	462.47	477.71	494.22	481.04	406.19	493.53	472.44	435.34	380.04	405.62	441.42	387.22	289.82
208690_s_at	yes	3492.98	4213.83	6441.06	4.0085	Yes, and meet 10%FDR	0.00028865	3492.7	4203.76	6584.37	4.2	4222.2	4261.07	4463.62	4199.49	4087.49	4317.56	4202.41	4118.78	4110.22	4153.18	4167.6	3598.05	3494.81
208698_s_at						Yes, but >10% FDR	0.03952	3550.72	4079.22	3584.37	0.6	3965.02	4231.64	4350.6	4020.06	4087.49	3972.96	3840.29	4118.78	3885.81	3942.79	3907.42	3769.09	3546.06
208702_x_at	Yes	3039.02	3777.69	337.062	0.703622	Yes, but >10% FDR	0.011592	3021.76	3799.59	344.367	0.6	3560.84	3717.2	3888.51	3986.76	3480.31	4053.63	3590.58	3361.76	3375.77	3439.54	3031.89	3249.5	2963.32
208703_s_at						Yes, but >10% FDR	0.017647	1998.45	2461.64	5444.37	0.6	2379.69	2488.4	2497.03	2373.83	2392	2524.88	2498.77	2469.49	2297.74	2297.74	2261.4	2352.53	1979.61
208704_x_at						Yes, but >10% FDR	0.021484	2313.01	3110.85	2804.37	0.3	3021.63	3123.61	3033.99	3167.22	2910.4	3023.49	2940.81	3002.61	2753.4	2698.61	2606.68	2957.17	2349.28
208717_at						Yes, but >10% FDR	0.017339	4082	4362.57	40.046	6.3	4230.33	4264.02	4377.83	4640.29	4269.94	4393.03	4193.68	4084.66	4107.37	4025.63	4115.92	4039.61	4118.78
208720_s_at						Yes, but >10% FDR	0.038096	1910.66	2149.06	40.046	6.3	2095.71	2152.8	2019.8	2285.03	2045.16	2252.01	2001.69	1825.4	1892.4	1997.53	1876.72	2063.67	1870.23
208728_s_at						Yes, but >10% FDR	0.031231	1520.08	1712.87	33.937	6.3	1626.25	1637.18	1683.21	1889.78	1709.08	1731.73	1561.81	1374.79	1531.79	1567.23	1541.37	1543.51	1568.32
208730_x_at						Yes, but >10% FDR	0.031058	157.957	255.615	19004.4	-6	171.98	156.28	162.02	179.77	184.31	201.69	160.9	153.81	128.27	131.14	155.52	138.33	257.6
208734_x_at						Yes, but >10% FDR	0.040126	2244.13	2491.16	404.367	6.3	2409.01	2420.35	2709.86	2535.4	2387.03	2495.3	2604.88	2425.39	2405.3	2216.4	2352.53	2082.35	2289.79
208746_x_at						Yes, but >10% FDR	0.023313	5727.26	6554.16	8564.37	1.8	6772.37	6845.78	6548.73	6566.91	6530.6	6436.23	6630.95	6135.65	6798.5	6374.07	6413.96	6118.66	5752.61
208747_s_at						Yes, but >10% FDR	0.042947	174.616	233.073	15164.4	6.3	224.69	238.36	220.4	247.11	252.13	250.73	232.49	239.69	201.27	234.27	224.57	228.97	175.1
208759_at						Yes, but >10% FDR	0.033101	500.567	658.347	344.367	0.3	635.22	685.49	619.09	632.53	611.84	650.32	559.11	589.77	600.91	561.06	519.15	605.09	504.95
208763_s_at	Yes	223.075	272.901	353.132	15.1507	Yes, but >10% FDR	0.0079339	224.383	273.332	344.367	6.3	272.65	248.48	248.65	267.06	295.29	283.85	278.01	289.22	239.35	233.13	232.97	203.8	222.4
208766_s_at						Yes, but >10% FDR	0.02915	2041.05	2631.35	12164.4	6.3	2573.77	2599.47	2824.93	2378.77	2694.87	2502.23	2743.88	2572.58	2493.58	2569.02	2834.74	2498.77	2017.01
208771_s_at						Yes, but >10% FDR	0.019916	4406.95	5021.02	177.621	0.6	4800.23	5209.76	4959.57	5260.56	4653.18	5014.88	4881.13	4669.33	4573.24	4757.54	4402.17	4497.79	4411.34
208779_x_at						Yes, but >10% FDR	0.02543	1023.25	1179.53	0.389	6.3	1130.87	1221.98	1046.24	1121.33	990.49	999.46	1046.24	1027.56	963.41	1054.98	981.61	1039.73	991.18
208786_s_at						Yes, but >10% FDR	0.022445	1289.44	1403.23	77.64	6.3	1386.49	1410.51	1428.22	1374.79	1339.06	1431.19	1452.18	1266.82	1307.87	1304.25	1289.86	1371.94	1228.77
208792_s_at						Yes, but >10% FDR	0.017296	1634.3	2278.66	3884.37	0.6	2288.03	2267.68	2320.15	2326.59	2000.3	2498.77	2193.47	2101.2	2133.49	2031.04	2095.39	1948.3	1614.64
208795_s_at						Yes, but >10% FDR	0.036566	965.77	1215	18044.4	6.3	1235.51	1266.82	1174.64	1353.99	1169.76	1235.6	1257.2	1193.51	1197.66	1191.03	1107.43	1239.89	957.41
208796_s_at						Yes, but >10% FDR	0.018961	3819.28	4660.27	584.367	0.6	4497.79	4383.9	5025.32	4510.28	5001	4457.44	4371.76	4266.98	4469.82	4182.07	4050.82	3832.31	3964.71
208808_s_at						Yes, but >10% FDR	0.017595	901.919	1283.47	6404.37	6.3	1316.86	1282.73	1514.89	1119.78	1216.9	1309.68	1362.46	1221.98	1186.09	1294.34	1280.06	923.52	939.66
208815_x_at	Yes	2812.77	3156.69	104.384	17.928	Yes, but >10% FDR	0.013718	2814.43	3149.19	77.64	6.3	3147.76	2953.07	3267.56	3169.41	2998.45	3320.07	3240.5	2828.85	2704.23	2920.5	2807.36	2959.22	2672.55
208816_x_at						Yes, but >10% FDR	0.02952	4630.39	5277.4	3224.37	0.6	5261.37	5141.59	5238.72	5572.08	5231.47	5502.99	5195.33	5134.47	4887.9	5206.15	5046.26	4813.93	4711.6
208817_at	Yes	-38657.4	245.033	51623.8	11.4944	Yes, but >10% FDR	0.0097098	171.987	246.332	17144.4	6.3	244.1	257.96	249.35	247.11	240.68	263.75	261.56	224.88	253.53	227.7	221.63	248.14	169.25
208818_s_at						Yes, but >10% FDR	0.03511	510.119	722.348	2444.37	0.6	718.58	787.97	633.85	748.57	736.73	783.61	651.67	619.09	705.74	630.78	615.24	622.53	500.07
208819_at	yes	1407.57	1957.12	11532.9	12.1061	Yes, and meet 10%FDR	0.0010036	1441.66	1950.73	13124.4	6.3	1990.16	1974.13	1951	1975.5	1854.74	2079.47	2025.41	1844.48	1854.74	1970.03	2008.64	1874.12	1407.58
208820_at	Yes	1624.15	1793.58	113.322	14.312	Yes, but >10% FDR	0.014422	1625.36	1797.71	91.615	5.7	1784.12	1800.27	1854.74	1809.03	1700.8	1771.8	1834.28	1662.34	1515.94	1580.32	1731.73	1664.65	1628.13
208824_x_at						Yes, but >10% FDR	0.011081	309.104	367.433	77.64	6.3	336.08	363.04	347.05	383.48	371.44	388.29	386.68	292.44	325.16	343.22	295.09	309.54	296.32
208826_x_at						Yes, but >10% FDR	0.045351	11177.4	13554.9	14564.4	6.3	13627.4	14432.2	13979.3	13606.4	13391.2	12520.5	13710.6	13043.1	14233.5	12598.8	13493.7	13354.1	11175.1
208833_s_at	Yes	5472.74	2.48949e+06	52070	-14.228	Yes, but >10% FDR	0.018885	5454.4	6410.45	19184.4	-6	5496.21	5393.48	5841	5595.3	5665.55	5453.63	5264.21	5184.54	5438.53	5461.19	5669.48	5209.76	6445.16
208837_at	Yes	858.555	1111.75	9616.73	0.343485	Yes, but >10% FDR	0.01114	1007.67	1102.91	108.105	6.3	1114.02	1099.78	1081.64	1121.33	1077.89	1107.43	1126.01	1032.55	1027.56	991.18	1083.14	956.09	960.74
208839_s_at						Yes, but >10% FDR	0.031775	971.204	1209.76	13064.4	6.3	1192.41	1177.08	1235.6	1257.2	1151.26	1193.51	1341.84	1126.79	1239.89	1150.46	1215.22	1173.01	957.41
208840_s_at	Yes	-977.032	911.424	684727	0.580554	Yes, but >10% FDR	0.019344	648.543	902.478	6404.37	1.2	815.76	877.34	1016.22	985.01	892.68	868.27	948.83	831.17	911.44	888.98	805.64	771.22	645.83
208846_s_at	Yes	1403.37	3223.2	386537	0.414483	Yes, but >10% FDR	0.0044675	2723.38	3229.88	3104.37	0.6	3216.38	3059.33	3347.81	3240.5	3236.01	3206.98	3242.75	3050.86	3127.95	3040.3	3099.89	2838.67	2764.88
208849_at	Yes	60.1397	77.3276	11845.6	-8.14848	Yes, but >10% FDR	0.0059595	60.177	76.445	12524.4	-6	60.6	58.77	59.38	63.29	65.89	56.77	63.29	55.79	61.31	59.59	56.85	63.51	77.33
208851_s_at						Yes, but >10% FDR	0.045405	82.778	91.997	209.592	-6	83.59	88.71	80.84	78.3	89.45	82.14	77.98	78.58	94.22	89.57	86.64	94.09	95.94
208853_s_at						Yes, but >10% FDR	0.018923	2932.05	4422.43	4964.37	1.2	4004.61	4141.68	5099	4813.93	4158.94	4025.63	4491.56	4646.73	4036.81	4144.55	3929.15	3453.87	2959.22
208861_s_at						Yes, but >10% FDR	0.044089	468.254	652.121	16004.4	6.3	656.05	616.09	633.85	633.85	709.67	653.48	677.93	574.44	724.08	582.05	678.4	647.62	465.29
208879_x_at						Yes, but >10% FDR	0.029022	193.115	269.46	15824.4	6.3	269.93	285.83	299.62	240.52	250.91	257.96	288.21	268.36	254.23	282.28	251.78	266.87	188.84
208881_x_at	Yes	1204.17	1366.28	103.602	29.0508	Yes, but >10% FDR	0.0058387	1204.33	1365.67	77.64	6.3	1335.97	1398.83	1376.7	1389.16	1313.32	1352.11	1397.86	1205.15	1251.12	1188.56	1284.51	1083.14	1213.53
208886_at						Yes, but >10% FDR	0.028785	459.387	558.054	65.796	6.3	551.2	544.96	566.13	566.92	561.83	526.03	596.34	401.99	508.82	471.46	494.56	503.9	375.59
208892_s_at						Yes, but >10% FDR	0.0088472	131.3	175.165	5384.37	-6	139.02	132.15	148.36	141.44	113.54	142.22	126.06	124.85	121.18	140.56	128	186.5	168.31
208900_s_at	Yes	469.101	1183.33	52871	-1.51001	Yes, but >10% FDR	0.0034176	469.221	669.112	11924.4	-6	446.17	520.23	494.56	484.72	457.94	506.7	474.08	419.93	403.94	480.7	485.73	521.31	682.18
208906_at						Yes, but >10% FDR	0.005985	948.322	1066.93	77.64	6.3	1059.13	1031.12	1101.31	1112.05	1054.98	1020.46	1124.45	913.97	1000.15	964.74	974.15	908.91	928.01
208921_s_at	Yes	2952.92	3668.61	4288.52	0.287896	Yes, but >10% FDR	0.0070815	3321.72	3617.49	65.796	6.3	3657.56	3650.81	3598.05	3600.55	3598.05	3558.37	3678.75	3256.26	3371.09	3468.27	3468.27	3121.45	3244.99
208926_at						Yes, but >10% FDR	0.027785	620.796	737.619	65.796	6.3	701.25	790.71	719.57	723.58	698.44	756.92	733.68	612.26	662.6	674.18	511.65	610.14	653.93
208929_x_at						Yes, but >10% FDR	0.019667	14374	16318	17264.4	-6	14503.5	14972.2	15055.5	14715	13940.5	13844.3	14532.5	14482.3	14125.4	13739.1	14086.2	14292.8	16395.4
208930_s_at						Yes, but >10% FDR	0.022856	148.42	185.585	1184.37	0.6	176.25	193.88	193.34	189.76	170.66	190.68	167.85	170.78	184.31	163.6	163.14	161.46	148.36
208937_s_at	Yes	2897.68	5123.54	22326	-1.19675	Yes, but >10% FDR	0.0045248	2898.96	4244.42	10184.4	-2.4	2744.51	2676.26	2912.41	3489.97	2764.88	2938.78	2874.31	2822.97	2707.98	3211.43	3000.53	3536.24	4202.41
208944_at	yes	4303.81	6494.12	6286.45	0.374796	Yes, and meet 10%FDR	0.00068808	4908.2	6428.36	1424.37	0.6	6241.94	6467.53	6672.45	6784.37	6199.77	6156.95	6204.07	5780.59	6001.05	5938.98	5564.36	5198.93	5106.08
208946_s_at						Yes, but >10% FDR	0.038541	1253.82	1566.71	3584.37	0.6	1478.36	1623.62	1607.94	1614.64	1560.72	1475.51	1631.52	1401.74	1589.11	1428.22	1406.6	1442.14	1245.92
208956_x_at						Yes, but >10% FDR	0.028754	3497.79	4233.49	9764.37	6.3	4152.54	4014.49	4476.02	3945.52	4396.07	4110.22	4383.9	4205.32	4532.21	4113.07	4380.86	3834.97	3499.66
208968_s_at						Yes, but >10% FDR	0.016427	1799.77	2151.18	10964.4	5.7	2222.89	2079.47	2264.54	2175.3	2112.89	2133.49	2252.01	2072.28	2123.16	2019.8	2101.2	2021.21	1784.12
208970_s_at	Yes	2139.29	2370.01	110.181	16.1641	Yes, but >10% FDR	0.0031918	2144.53	2378.8	91.615	6.3	2317.29	2341.15	2329.82	2363.98	2334.67	2447.34	2455.84	2170.78	2190.43	2078.03	2205.67	2021.21	2201.09
208978_at	yes	121.344	156.969	56.4402	3.73431	Yes, and meet 10%FDR	0.00091811	121.676	157.454	55.76	3.9	156.64	145.31	151.48	158.02	163.37	167.27	147.95	124.59	111.51	137.28	126.41	118.85	111.43
208980_s_at						Yes, but >10% FDR	0.033742	10364.5	11580.8	2564.37	0.9	11856.9	11886.2	10779.5	11960.6	11441.6	11935.7	11276.2	11339	11457.5	11260.6	10983.1	10426.7	10565
208986_at						Yes, but >10% FDR	0.040768	681.274	850.395	9464.37	6.3	849.22	898.27	976.85	842.19	834.06	805.09	873.7	834.06	802.86	845.11	871.89	751.69	686.44
208990_s_at						Yes, but >10% FDR	0.039845	1298.26	1515.91	8084.37	2.1	1553.77	1482.69	1536.04	1443.14	1500.26	1502.34	1590.21	1413.44	1607.94	1490.93	1493	1380.52	1313.32
208996_s_at						Yes, but >10% FDR	0.047542	2169.37	2416.11	5144.37	3.9	2507.83	2483.23	2398.64	2438.87	2417	2355.8	2462.66	2216.4	2502.23	2346.02	2382.07	2187.4	2163.27
209009_at						Yes, but >10% FDR	0.044809	3986.9	4281.41	7.651	6.3	4192.06	4118.78	4435.87	4305.6	4383.9	3923.7	4252.22	3975.72	3961.96	4025.63	4039.61	3761.26	3856.3
209014_at						Yes, but >10% FDR	0.0074792	1723.32	2337.83	11204.4	6.3	2427.82	2538.92	2307.32	2217.93	2166.27	2337.9	2509.18	2357.43	2392	2175.3	2275.55	2136.45	1689.05
209020_at	Yes	6.92119	312.64	285748	0.344708	Yes, but >10% FDR	0.003221	208.082	308.461	2324.37	0.6	298.56	338.5	304.23	283.26	313.43	314.3	306.77	302.54	264.84	265.4	250.73	264.29	206.79
209032_s_at						Yes, but >10% FDR	0.037549	78.159	82.996	40.046	-1.8	75.36	77.49	80.84	78.19	78.25	79.95	79.89	82.94	85.45	85.09	79.78	82.2	81.46
209036_s_at						Yes, but >10% FDR	0.03491	5795.36	6464.66	524.367	0.9	6411	6400.64	6535.13	6700.25	5947.22	6690.97	6644.75	6221.3	6127.15	5943.1	6191.19	5661.62	5780.59
209038_s_at	Yes	90.8331	118.568	18884.6	-2.44931	Yes, but >10% FDR	0.0049025	90.782	110.484	12044.4	-6	88.65	95.54	89.14	90.82	95.34	95.01	92.67	89.82	85.75	84.68	92.22	95.6	111.82
209043_at						Yes, but >10% FDR	0.020098	993.573	1268.69	2204.37	0.6	1244.2	1283.62	1207.66	1369.09	1200.98	1311.5	1259.82	1140.14	1248.52	1126.01	1095.22	1152.86	998.07
209070_s_at	Yes	92.5935	113.34	47.442	-9.55981	Yes, but >10% FDR	0.009756	93.56	113.549	55.76	-5.4	98.42	92.86	92.35	84.74	105.79	81.4	96.87	112.83	110.35	104.55	116.16	121.35	114.8
209082_s_at						Yes, but >10% FDR	0.039358	113.65	172.217	2984.37	0.3	169.16	179.64	160.67	176.56	162.13	154.13	167.96	140.56	161.79	146.63	142.52	157.37	113.14
209090_s_at						Yes, but >10% FDR	0.033742	818.55	1108.2	10784.4	6.3	1101.48	1138.56	1136.2	998.07	1090.67	1027.56	1258.95	1096.74	1036.14	1057.18	1183.63	998.07	804.53
209091_s_at						Yes, but >10% FDR	0.033083	576.793	835.759	10064.4	3.6	851.78	820.3	826	855.72	921.6	973.47	831.75	779.28	723.58	779.28	831.75	709.18	579.63
209095_at						Yes, but >10% FDR	0.026229	3234.73	4010.41	884.367	0.3	3806.14	3904.71	4278.83	4064.89	3805.84	3766.48	3660.94	3683.85	3717.2	3615.55	3756.05	3425.27	3263.04
209103_s_at						Yes, but >10% FDR	0.03497	2879.14	3259.86	13724.4	6.3	3309.1	3182.62	3242.75	3149.7	3267.56	3340.85	3477.9	3187.04	3331.6	3138.81	3308.59	3215.88	2856.44
209104_s_at	Yes	7413.17	7914.86	47.88	17.29	Yes, but >10% FDR	0.013441	7413.17	7936.53	55.76	6.3	7900.16	7750.1	7809.42	7814.84	8135.41	8079.22	7880.11	7316.81	7680.58	7231.1	7675.26	7156.31	7418.95
209114_at						Yes, but >10% FDR	0.016403	480.683	565.574	65.796	6.3	540.57	556.41	536.71	570.47	615.24	526.76	574.04	441.42	504.6	498.69	446.96	485.73	506.7
209126_x_at						Yes, but >10% FDR	0.031231	86.332	102.746	4124.37	0.6	101.23	107.41	100.99	99.25	103.25	100.71	106.67	94.55	102.89	94.94	97.61	95.01	86.16
209127_s_at						Yes, but >10% FDR	0.031266	338.348	399.971	47.254	6.3	363.97	413.86	360.54	438.06	405.06	437.15	381.62	338.5	313	336.86	316.93	380.04	326.29
209131_s_at						Yes, but >10% FDR	0.036671	140.014	164.146	1184.37	6.3	142.28	167.5	170.31	164.16	165.08	151.69	166.92	174.73	172.57	154.02	140.46	141.53	138.43
209132_s_at	Yes	1303.62	2022.74	6015.71	0.548268	Yes, but >10% FDR	0.0084722	1593.25	2015.01	704.367	1.2	1976.56	2042.33	1993.38	1926.81	1980.98	2096.84	2166.27	1859.89	1952.36	1676.22	1655.44	1822.88	1421.3
209139_s_at	Yes	901.856	1088.95	107.464	0.829556	Yes, but >10% FDR	0.0022295	901.584	1089.36	108.105	0.9	992.09	1080.89	1152.86	1111.27	1098.26	1066.01	1026.84	941.62	985.7	949.48	920.96	892.68	884.67
209140_x_at						Yes, but >10% FDR	0.023337	2515.8	3383.68	5144.37	0.6	3454.41	3560.84	3087.02	3406.32	3236.01	3688.96	3315.48	3162.83	3187.04	3076.34	3184.83	2998.45	2476.35
209142_s_at						Yes, but >10% FDR	0.029601	805.619	1121.01	1244.37	0.9	1015.44	1035.42	1308.77	1000.84	1168.95	1201.82	1082.39	1138.56	946.86	999.46	937.71	820.86	828.87
209147_s_at	Yes	519.954	629.533	282.488	0.568601	Yes, but >10% FDR	0.0047246	525.612	632.126	209.592	0.6	632.14	606.35	653.48	615.66	618.66	630.35	582.45	572.45	598.41	570.07	493.19	556.41	527.49
209149_s_at	Yes	642.34	848.068	3506.48	52.4421	Yes, but >10% FDR	0.014141	648.375	853.91	4604.37	6.3	848.37	812.37	921.6	764.3	865.27	870.08	942.27	769.09	849.22	838.11	834.63	599.66	685.02
209160_at						Yes, but >10% FDR	0.020729	29325.9	32726.4	17684.4	6.3	32374.2	31916.2	33087.5	31367.9	32205.1	32768	32813.5	33806.2	32586.8	33087.5	34088.6	32904.6	29206.5
209177_at						Yes, but >10% FDR	0.017691	618.991	696.651	108.105	6.3	671.23	703.79	687.4	713.12	656.66	737.76	718.08	641.36	580.04	644.93	644.93	636.93	565.74
209180_at						Yes, but >10% FDR	0.02915	1259.94	1529.45	17684.4	-6	1270.34	1347.44	1239.03	1344.64	1258.95	1316.05	1328.88	1147.28	1223.67	1206.82	1292.55	1230.48	1544.58
209185_s_at						Yes, but >10% FDR	0.040056	1341.04	1466.1	7.651	6.3	1419.34	1462.28	1454.19	1534.98	1480.63	1262.44	1402.71	1325.21	1377.66	1315.14	1313.32	1266.82	1445.15
209194_at	Yes	-11853.2	2776.36	5.06176e+06	0.624998	Yes, but >10% FDR	0.020509	2209.14	2754.9	8984.37	2.1	2662.69	2617.55	2821.02	2963.32	2876.3	2728.7	2789.9	2646.74	2910.4	2528.38	2709.86	2467.78	2207.2
209205_s_at						Yes, but >10% FDR	0.017682	271.472	438.577	15824.4	6.3	468.57	479.7	454.77	449.13	462.4	389.37	449.13	406.19	405.34	419.64	370.67	433.53	264.29
209212_s_at						Yes, but >10% FDR	0.045323	1008.56	1386.35	19904.4	6.3	1344.33	1470.41	1459.24	1384.36	1199.32	1429.21	1391.09	1376.7	1236.46	1442.14	1344.64	1479.61	1019.04
209224_s_at						Yes, but >10% FDR	0.036798	3526.69	3916.15	108.105	0.9	3809.65	3787.42	4164.71	4017.27	3872.37	3837.63	3795.3	3722.36	3605.54	3509.38	3769.09	3285.73	3650.81
209248_at						Yes, but >10% FDR	0.038744	3189.85	3572.71	4064.37	1.2	3564.68	3475.49	3756.05	3463.46	3444.31	3514.25	3583.12	3724.94	3521.56	3446.7	3458.67	3251.75	3242.75
209257_s_at						Yes, but >10% FDR	0.03359	730.324	939.561	1904.37	6.3	925.87	950.14	926.73	910.17	881.61	1011.3	1017.63	1002.93	769.09	970.11	697.48	813.5	701.84
209263_x_at						Yes, but >10% FDR	0.03432	777.213	964.205	127.564	0.9	937.78	907.03	1014.11	987.75	873.7	1052.06	886.51	850.4	803.97	856.91	763.77	871.28	677.93
209275_s_at						Yes, but >10% FDR	0.020941	504.135	581.59	464.367	2.4	585.15	592.63	499.38	582.05	590.58	616.09	594.28	585.69	549.89	517.35	501.46	494.56	506.7
209287_s_at	Yes	217.561	3645.32	43842.7	-9.71179	Yes, but >10% FDR	0.011022	216.483	299.237	17264.4	-6	202.67	215.57	197.68	232.32	210.84	205.79	219.34	252.48	201.83	226.44	231.84	213.93	301.5
209296_at	Yes	-76970	1498.71	42838	14.8948	Yes, but >10% FDR	0.0022611	1129.09	1512.86	17144.4	6.3	1550.18	1502.34	1557.48	1538.17	1434.17	1481.66	1518.05	1379.57	1521.21	1537.1	1439.15	1525.43	1111.27
209303_at	Yes	666.259	2043.96	92116.4	0.481634	Yes, but >10% FDR	0.0038513	1482.97	2021.05	5144.37	0.9	1989.24	2008.64	2083.8	2039.5	2157.28	1925.48	2107.04	1885.85	1998.91	1794.04	1951	1621.37	1549.94
209306_s_at	Yes	213.959	386.988	8241.8	0.540726	Yes, but >10% FDR	0.010696	259.829	390.046	2264.37	0.6	346.81	417.32	396.45	364.56	390.18	400.87	411.86	323.58	360.54	339.67	342.27	282.67	273.99
209310_s_at	yes	114.768	145.832	91.1944	2.32279	Yes, and meet 10%FDR	0.00057324	114.949	145.22	91.615	2.4	141.96	156.5	145.61	148.47	129.61	154.13	139.39	126.24	113.38	114.17	116.89	117.3	112.67
209313_at						Yes, but >10% FDR	0.017136	866.853	1046.92	4604.37	6.3	1036.46	1107.43	1101.31	1051.33	1089.92	1021.16	1033.27	956.09	1080.89	961.4	1028.27	834.06	892.68
209318_x_at						Yes, but >10% FDR	0.048125	115.427	133.798	704.367	6.3	133.7	135.02	136.62	138.24	134.64	124.33	136.05	120.59	136.24	115.6	115.04	128.53	105.93
209329_x_at	Yes	3708.85	4632.65	2834.02	0.614277	Yes, but >10% FDR	0.0096889	3771.16	4636.89	2144.37	0.6	4590.53	4566.9	4780.68	4551.1	4359.66	4925.31	4731.23	4258.12	4405.23	4442.02	4014.49	4098.84	3848.29
209337_at	yes	704.275	1140.64	10888.1	11.2727	Yes, and meet 10%FDR	0.00063678	725.132	1151.52	11384.4	6.3	1172.56	1171.39	1156.86	1144.9	1196	1048.42	1191.03	1046.24	1194.34	1075.66	1149.67	1019.75	704.28
209343_at						Yes, but >10% FDR	0.028241	88.594	110.895	344.367	-0.6	86.26	99.46	87.24	81.01	87.97	93.18	91.46	108.38	89.76	102.61	110.05	106.01	110.28
209350_s_at						Yes, but >10% FDR	0.039313	459.182	520.097	65.796	6.3	507.68	531.16	556.79	516.28	497.31	526.39	517.71	441.42	484.72	411.86	473.76	446.03	509.17
209357_at	Yes	69.84	80.4784	-15638.8	1	No		76.249	86.903	7.651	6.3	73.48	80.78	81.57	107.04	87.85	73.06	77.82	79.84	84.33	77.12	73.57	77.71	69.84
209372_x_at	Yes	102.205	115.708	12829.9	-2.7043	Yes, but >10% FDR	0.0049612	102.611	113.952	10964.4	-6	103.22	101.13	102.82	103.61	97.34	103.68	104.98	102.39	103.32	99.25	102.89	106.74	114.48
209378_s_at	Yes	243.191	339.856	237.391	-0.768687	Yes, but >10% FDR	0.0028914	242.699	336.379	209.592	-0.9	255.78	224.1	261.38	208.08	286.22	240.35	266.5	273.61	297.97	332.45	323.36	310.4	356.81
209382_at						Yes, but >10% FDR	0.006712	310.16	377.716	2804.37	5.4	371.47	348.25	361.79	393.44	415.3	371.19	400.59	375.59	376.63	376.37	329.47	305.71	315.61
209388_at						Yes, but >10% FDR	0.022066	737.9	865.208	40.046	6.3	801.37	781.99	919.69	910.81	867.67	893.3	787.97	742.89	798.42	767.49	707.21	741.86	685.97
209389_x_at						Yes, but >10% FDR	0.033647	1765.99	2239.19	4964.37	1.2	2166.44	2193.47	2178.32	2491.85	2227.18	2117.29	2324.98	2018.41	2273.97	2167.78	2088.14	1878.02	1825.4
209391_at						Yes, but >10% FDR	0.024286	130.313	169.004	2864.37	0.6	168.07	174.85	160.9	175.34	165.08	182.4	151.06	155.96	175.1	152.22	148.47	146.83	129.43
209398_at	Yes	27.2489	358.623	74759	0.5351	Yes, but >10% FDR	0.010901	225.266	360.683	3884.37	0.9	333.37	409.3	371.19	350.92	305.71	348.25	362.79	369.9	346.81	324.71	280.53	294.68	227.86
209415_at	Yes	78.5191	306.476	36545.2	-9.89929	Yes, but >10% FDR	0.0019529	78.068	104.692	18164.4	-6	78.74	82.2	81.46	82.71	77.71	82.03	78.19	75.85	75.27	83.11	71.85	73.11	106.82
209421_at						Yes, but >10% FDR	0.049833	666.197	750.114	3104.37	6.3	740.89	712.63	728.61	751.69	809	753.26	730.63	738.27	768.55	813.5	699.41	685.97	646.72
209428_s_at						Yes, but >10% FDR	0.043879	382.357	433.592	12.571	6	417.8	449.13	415.3	423.73	469.51	405.62	380.57	381.09	397.28	426.09	352.63	362.29	384.81
209432_s_at						Yes, but >10% FDR	0.022916	884.268	1036.85	8324.37	6.3	1046.48	1039.73	1058.64	1112.82	1031.12	1041.18	996.69	956.09	1068.23	994.62	1061.58	919.69	884.67
209435_s_at	Yes	646.069	1948	342066	-0.554549	Yes, but >10% FDR	0.0079536	659.997	909.407	8384.37	-6	656.05	652.58	630.78	598.83	674.65	730.63	597.17	634.29	673.25	790.16	643.59	845.7	908.28
209445_x_at						Yes, but >10% FDR	0.046855	1441.7	1693.28	404.367	0.9	1666.83	1629.26	1601.27	1769.35	1632.65	1826.67	1622.5	1594.62	1526.49	1634.92	1369.09	1512.79	1440.15
209447_at						Yes, but >10% FDR	0.028582	77.848	115.388	19544.4	6.3	120.23	126.24	97.61	118.11	110.97	121.26	115.04	116.81	108.38	108.38	109.9	127.47	76.85
209449_at	Yes	-2491.48	376.698	76735.5	3.53766	Yes, but >10% FDR	0.0049391	281.399	377.277	15824.4	6.3	366.84	367.09	382.15	381.36	384.01	381.09	405.34	343.94	397.83	356.07	377.94	374.55	276.86
209477_at						Yes, but >10% FDR	0.03505	101.916	111.649	28.76	6.3	115.14	106.52	109.9	115.68	108.76	111.35	102.75	97.48	109.06	95.34	100.08	103.54	104.4
209479_at						Yes, but >10% FDR	0.020037	269.414	317.099	344.367	6.3	313.82	316.71	309.12	314.52	305.28	326.29	335.46	314.95	287.62	261.38	280.14	305.07	235.89
209492_x_at						Yes, but >10% FDR	0.042314	4770.6	5299.59	291.836	0.6	5226.23	5545.11	5202.54	5063.78	5152.3	5529.76	5018.36	5141.59	4891.29	5028.81	4997.53	4807.26	4718.13
209494_s_at						Yes, but >10% FDR	0.01881	110.887	136.202	3584.37	-6	116.59	107.56	116.57	104.04	114.56	105.35	113.06	103.97	112.91	117.87	120.93	146.22	124.07
209496_at	yes	66.4237	86.4603	10579.8	-11.0869	Yes, and meet 10%FDR	0.0014447	66.456	85.796	11024.4	-6	67.59	66.58	66.3	63.12	70.82	67.09	64.94	71.75	61.73	67.18	63.56	73.41	86.46
209510_at						Yes, but >10% FDR	0.0313	846.393	1067.1	7304.37	6.3	1056.04	1017.63	1127.57	1039.01	1099.78	968.09	1122.11	1013.41	1143.31	968.76	1123.67	867.67	857.5
209547_s_at	Yes	125.19	141.37	-17456.6	1	No		137.932	147.017	28.76	6.3	144.05	142.32	136.62	164.39	140.85	158.79	137.28	131.14	143.81	136.52	125.19	148.78	138.52
209550_at						Yes, but >10% FDR	0.02346	103.719	126.68	18044.4	-6	105.53	97.01	106.23	109.52	99.66	94.42	112.6	100.85	107.41	104.26	102.54	101.27	127.65
209551_at	Yes	65.53	69.4879	-7618.37	1	No		66.111	74.131	1304.37	0.9	71.83	68.36	84.57	67.51	71.9	77.76	74.7	74.18	72.1	68.07	70.82	67.6	65.53
209581_at	yes	996.475	1769.68	17404.7	0.525281	Yes, and meet 10%FDR	0.00035799	1290.6	1753.48	3524.37	0.9	1746.33	1769.35	1831.74	1726.94	1697.27	1836.83	1751.04	1624.75	1763.22	1566.14	1574.85	1425.25	1330.73
209586_s_at						Yes, but >10% FDR	0.032731	189.423	249.544	12104.4	-6	187.45	207.65	182.91	177.91	217.82	165.19	181.9	187.01	192.4	204.36	188.97	203.8	250.38
209590_at	Yes	148.437	194.2	11065.4	-6.82712	Yes, but >10% FDR	0.0024059	148.337	192.658	11144.4	-6	148.52	154.99	134.36	146.83	147.34	148.67	148.36	162.35	154.13	139.01	148.26	163.71	194.15
209601_at						Yes, but >10% FDR	0.022726	71.917	86.823	15164.4	-6	74.69	74.49	73.11	76.43	69.99	67.46	71.06	73.93	68.12	77.28	68.26	72.91	87.61
209602_s_at						Yes, but >10% FDR	0.027235	61.485	68.618	1004.37	6.3	67.49	70.18	76.27	67.37	66.58	67.04	67.14	67.32	70.67	63.91	62.99	59.88	61.1
209603_at						Yes, but >10% FDR	0.039198	69.437	74.252	65.796	6.3	75.17	74.49	72.2	73.93	76.27	71.9	76.96	66.76	71.41	68.55	66.95	72.35	71.06
209605_at						Yes, but >10% FDR	0.0079078	4627.22	5377.29	13484.4	6.3	5590.13	5442.3	5572.08	5333.99	5245.99	5583.68	5434.76	5235.09	5400.96	5173.77	5231.47	5282.48	4573.24
209623_at						Yes, but >10% FDR	0.048008	1854.24	2155.82	18764.4	6.3	2167.44	2202.61	2118.75	2236.46	2143.87	2092.48	2280.29	2036.67	2151.31	2121.69	2035.26	2204.14	1847.04
209624_s_at	Yes	152.488	200.662	3258.72	0.877788	Yes, but >10% FDR	0.0020467	154.21	200.062	3044.37	0.9	186.28	193.21	207.79	208.23	199.6	205.22	199.47	210.26	183.29	187.4	179.89	163.71	158.79
209627_s_at						Yes, but >10% FDR	0.0054832	305.024	334.533	177.621	-6	314.78	303.38	309.54	313.86	302.75	295.29	302.96	305.92	349.46	333.84	320.46	334.53	327.42
209639_s_at	Yes	61.5483	85.6132	29287.8	-19.6546	Yes, but >10% FDR	0.012719	61.373	75.503	18464.4	-6	61.37	58.16	63.03	64.85	62.08	59.06	64.89	59.59	63.25	65.66	58.32	58.32	76.37
209643_s_at	Yes	158.98	183.115	5506.63	-1.56764	Yes, but >10% FDR	0.0086155	158.773	184.655	6164.37	-1.5	162.39	159.34	156.82	160.79	171.61	154.56	158.02	154.45	152.32	160.79	168.31	174.73	182.28
209655_s_at	Yes	-208.615	93.4735	78724.3	2.691	Yes, but >10% FDR	0.004593	73.953	93.6	15164.4	6.3	91.74	99.59	96.6	93.96	99.39	89.88	91.84	89.02	93.12	91.96	90.76	92.6	72.5
209657_s_at	Yes	81.3358	92.3981	1872.79	2.5143	Yes, but >10% FDR	0.0068116	80.907	92.349	1964.37	2.4	94.54	93.38	91.65	85.75	95.94	89.14	93.05	93.96	94.48	89.33	84.16	79.23	83.11
209661_at	yes	72.8828	105.794	11014.7	-9.18099	Yes, and meet 10%FDR	0.00089381	72.927	104.903	11504.4	-6	76.41	69.41	71.85	73.67	72.15	84.45	66.72	74.03	69.79	72.81	70.42	82.48	105.79
209669_s_at	Yes	1748.7	2219.17	2176.84	0.411412	Yes, but >10% FDR	0.0066351	1968.74	2198.62	108.105	6.3	2166.77	2269.25	2245.78	2115.82	2123.16	2288.2	2238.01	2036.67	1920.15	2049.42	2067.97	1895.02	1843.2
209671_x_at	yes	68.6814	83.126	105.673	-15.6617	Yes, and meet 10%FDR	0.00050045	68.786	82.935	77.64	-6	67.26	67	64.62	69.5	75.9	69.31	67.18	81.97	81.91	83.46	85.04	78.52	86.7
209682_at						Yes, but >10% FDR	0.035411	76.871	106.399	8264.37	1.8	107.57	96.2	109.74	105.05	109.67	93.96	107.78	107.26	123.13	99.53	100.08	91.27	76.32
209686_at						Yes, but >10% FDR	0.044434	68.552	76.608	4964.37	-3.9	67.15	74.96	69.55	67.28	64.85	70.08	67	69.31	70.18	65.62	70.13	75.95	76.96
209688_s_at						Yes, but >10% FDR	0.040268	191.244	223.39	127.564	6.3	227.93	218.73	201.41	224.41	215.72	234.27	238.69	212.6	173.53	195.77	193.74	214.97	170.43
209690_s_at	Yes	297.711	348.59	20.7763	1.56095	Yes, but >10% FDR	0.013354	296.858	351.292	17.504	1.5	329.55	342.03	362.79	372.99	328.56	329.7	322.69	283.66	271.72	318.91	298.79	301.08	306.98
209702_at						Yes, but >10% FDR	0.0067954	1078.82	1177.86	9.029	6.3	1153.84	1196.83	1144.9	1191.03	1236.46	1073.42	1144.1	1077.15	1060.85	1077.89	1077.15	1039.01	1095.98
209707_at						Yes, but >10% FDR	0.03299	562.181	706.717	4484.37	3.3	676.37	670.92	798.42	644.93	717.58	701.35	789.06	713.61	700.87	710.16	667.67	572.84	571.26
209715_at	Yes	247.45	269.508	-15182	1	No		262.233	291.421	2.402	6.3	278.18	312.56	274.56	293.86	247.45	251.95	283.07	269.85	270.22	256.36	254.94	273.42	259.39
209716_at						Yes, but >10% FDR	0.033027	106.829	126.285	19724.4	6.3	119.43	117.7	123.55	131.42	124.93	128.18	131.6	125.19	128.09	125.98	126.5	131.6	106.74
209718_at	Yes	104.666	60227.1	58075.9	-10.9471	Yes, but >10% FDR	0.00961	104.147	146.406	18044.4	-6	104.78	116.65	92.28	118.52	105.27	102.61	110.05	102.32	109.9	97.01	97.07	99.53	148.16
209721_s_at	yes	78.1071	778.841	103788	-2.42271	Yes, and meet 10%FDR	0.0008043	78.426	109.059	14864.4	-6	79.5	83.29	77.76	86.28	71.36	73.21	79.51	77.12	79.56	73.26	78.47	80.56	111.12
209730_at	Yes	101.639	144.123	12179.9	-9.01554	Yes, but >10% FDR	0.0043967	102.146	141.597	13424.4	-6	105.08	109.14	94.09	114.01	102.68	110.35	100.78	93.9	99.94	93.77	94.29	107.78	144.11
209731_at						Yes, but >10% FDR	0.028488	213.011	273.526	150.526	0.6	286.82	257.6	242.53	310.4	264.29	251.43	270.6	233.78	231.84	224.41	232.65	228.49	203.09
209746_s_at						Yes, but >10% FDR	0.032185	178.764	259.503	291.836	0.6	245.87	308.47	212.31	268.73	234.92	255.65	243.37	213.49	217.52	212.31	215.42	182.15	168.78
209747_at						Yes, but >10% FDR	0.048154	128.586	184.237	12944.4	-6	135.02	123.13	120.18	107.41	156.28	107.71	125.8	128	145.21	133.16	138.72	138.14	185.08
209759_s_at						Yes, but >10% FDR	0.043306	963.92	1092.9	28.76	6.3	1047.13	1092.18	1098.26	1055.71	1068.97	1195.17	967.42	996	979.57	841.61	999.46	999.46	1005.71
209769_s_at	Yes	85.3282	257.494	35205.3	-9.23815	Yes, but >10% FDR	0.003035	85.085	116.155	17564.4	-6	84.56	82.31	79.84	88.95	86.52	96.67	83.81	85.15	91.08	79.67	81.8	83.58	117.3
209773_s_at						Yes, but >10% FDR	0.03716	3911.03	4464	4304.37	6.3	4370.75	4202.41	4595.48	4576.41	4566.9	4592.3	4803.93	4396.07	4432.79	4231.64	4374.8	3748.25	4076.17
209789_at						Yes, but >10% FDR	0.036107	83.415	105.324	14204.4	-6	82.31	89.26	87.37	82.25	81.01	80.28	78.79	78.96	95.01	82.42	89.02	85.92	105.49
209791_at						Yes, but >10% FDR	0.019549	84.831	115.488	10364.4	-1.5	84.27	80.39	79.29	76.06	100.57	83.11	80.39	85.39	86.04	90.89	91.96	95.14	115.28
209796_s_at						Yes, but >10% FDR	0.019018	1319.02	1512.74	150.526	6	1501.65	1514.89	1425.25	1624.75	1429.21	1584.71	1512.79	1466.34	1314.23	1395.92	1406.6	1245.06	1288.07
209803_s_at	yes	3452.29	4323.6	1296.52	-13.5097	Yes, and meet 10%FDR	0.0010584	3448.07	4270.22	1544.37	-6	3446.97	3456.27	3867	3089.16	3411.05	3585.6	3387.49	3283.46	3543.6	3548.52	4329.55	4296.66	4344.58
209835_x_at	yes	1640.71	2022.05	796.785	0.60878	Yes, and meet 10%FDR	0.0013318	1650.92	2028.66	644.367	0.6	1965.33	1972.76	2095.39	2088.14	1912.18	2067.97	1932.16	1982.36	1785.36	1845.76	1774.26	1713.82	1661.19
209837_at						Yes, but >10% FDR	0.024171	98.377	109.895	47.254	5.7	105.63	103.75	104.4	116.08	110.81	116.97	105.49	95.54	97.48	94.88	102.47	100.92	98.98
209860_s_at						Yes, but >10% FDR	0.034476	2785.55	3367.85	4724.37	1.2	3352.45	3364.09	3719.78	3364.09	3138.81	3156.26	3502.09	3375.77	3485.14	3269.83	3059.33	3038.2	2797.65
209876_at	Yes	151.622	3557.88	306559	-1.78826	Yes, but >10% FDR	0.0028413	151.255	201.611	13484.4	-6	152.68	138.24	145.21	165.54	147.95	149.81	143.51	156.93	151.38	165.42	153.28	158.13	204.36
209896_s_at	Yes	1706.78	1966.37	121.587	75.1458	Yes, but >10% FDR	0.014114	1717	1951.38	108.105	6.3	1869.22	1937.53	2043.75	2039.5	1918.82	1867.64	2088.14	1768.12	1650.86	1811.54	1829.2	1588.01	1654.29
209903_s_at	Yes	-73212.4	484.399	52748.8	11.044	Yes, but >10% FDR	0.016167	349.376	482.639	17144.4	6.3	476.61	464.97	448.51	453.2	529.69	510.94	499.73	468.86	464.33	535.6	468.53	491.82	339.91
209911_x_at	Yes	580.995	899.822	1242.8	0.465225	Yes, but >10% FDR	0.014134	638.417	900.533	404.367	0.6	833.99	856.32	976.85	959.41	808.44	949.48	827.15	714.11	802.3	802.3	672.32	701.35	617.8
209916_at						Yes, but >10% FDR	0.047513	119.709	190.856	18044.4	5.1	193.34	206.5	193.74	190.02	193.07	197.4	174.13	217.67	194.42	148.98	196.72	187.53	124.67
209936_at						Yes, but >10% FDR	0.0052005	74.452	86.203	108.105	-1.8	78.07	72.91	76.9	77.76	74.03	67.23	77.87	81.57	82.83	85.57	87.85	89.57	82.88
209942_x_at						Yes, but >10% FDR	0.0090595	74.991	94.973	464.367	-1.2	77.08	77.76	71.41	76.59	82.54	66.95	70.52	86.76	83.17	83.92	96.87	99.11	90.64
209944_at						Yes, but >10% FDR	0.028991	1605.71	1841.82	33.937	4.8	1823.58	1785.36	1957.78	1670.43	1930.82	1841.93	1677.39	1509.65	1690.23	1549.94	1670.43	1556.4	1711.45
209957_s_at	Yes	72.0224	5197.76	51787.3	-9.37861	Yes, but >10% FDR	0.0081063	71.567	101.113	16244.4	-6	71.38	72.81	73.47	78.63	64.76	79.18	66.26	80.78	64.13	71.85	69.07	71.95	102.47
209964_s_at						Yes, but >10% FDR	0.037679	63.611	83.382	14564.4	6.3	81.82	83.75	82.2	82.6	77.28	83.23	90.38	78.52	86.16	93.44	76.9	81.8	62.77
209974_s_at						Yes, but >10% FDR	0.005734	2439.96	2922.6	18284.4	6.3	2896.31	2866.35	3031.89	2795.71	2912.41	2944.89	2864.37	3046.63	3000.53	2795.71	2953.07	3010.94	2410.3
209979_at	yes	87.0733	805.977	37170.7	-11.1145	Yes, and meet 10%FDR	0.00054091	87.107	144.901	18044.4	-6	88.46	85.81	91.2	82.88	87.97	106.3	82.65	84.33	88.83	87.49	79.34	79.62	147.85
209984_at						Yes, but >10% FDR	0.032621	112.345	128.013	944.367	6.3	122.95	133.62	127.65	129.52	130.87	119.93	130.78	116.73	136.71	115.92	113.54	115.52	108.76
209992_at	yes	74.8981	84.5575	446.832	-10.6158	Yes, and meet 10%FDR	0.00010869	74.894	84.981	524.367	-6	75.7	75.74	76.8	74.96	72.76	74.91	76.8	71.51	76.06	86.28	83.29	84.39	84.27
209998_at						Yes, but >10% FDR	0.0079799	310.01	358.53	108.105	6.3	363.88	365.57	364.81	387.49	318.03	354.1	363.8	324.71	298.17	316.71	300.04	322.47	304.65
210005_at	Yes	78.2474	103.421	11203.9	9.44115	Yes, but >10% FDR	0.009298	79.284	103.409	11744.4	6.3	103.35	107.04	104.04	110.51	95.34	101.83	108.23	99.66	95.6	104.4	107.63	97.01	78.25
210014_x_at						Yes, but >10% FDR	0.044275	1441.69	1992.27	644.367	0.3	1923.99	2154.29	1862.47	1970.03	1728.13	1752.26	1987.86	1672.74	1736.54	1771.8	1748.62	1648.57	1429.21
210021_s_at						Yes, but >10% FDR	0.021016	105.133	137.873	11924.4	-6	107.68	114.25	100.29	90.45	104.69	113.85	94.68	113.22	104.62	110.05	99.18	113.54	140.07
210028_s_at						Yes, but >10% FDR	0.015294	226.782	336.474	3224.37	0.6	316.07	343.22	327.19	360.04	311.91	339.91	355.08	305.49	282.48	324.71	270.41	288.21	228.81
210044_s_at	Yes	88.519	3176.76	392378	-1.79374	Yes, but >10% FDR	0.017288	88.02	117.63	14204.4	-6	86.24	83.87	83	89.51	93.12	82.37	78.3	94.35	100.01	91.33	93.77	91.2	119.02
210046_s_at	yes	216.295	298.246	2195.8	0.361223	Yes, and meet 10%FDR	0.00047189	241.34	294.931	344.367	0.6	291.61	305.28	290.42	296.93	288.01	297.35	277.82	260.11	271.91	273.61	254.76	243.03	239.02
210047_at						Yes, but >10% FDR	0.013429	99.004	112.433	5084.37	-6	101.36	94.48	97.61	95.27	100.43	96.34	101.06	100.08	96.94	106.67	99.04	115.92	109.14
210053_at	Yes	85.3274	100.809	41.4246	-10.6237	Yes, but >10% FDR	0.012017	84.624	101.508	40.046	-5.1	85.56	89.7	81.35	79.23	93.05	83.06	92.86	101.2	104.4	88.83	102.61	102.82	104.98
210054_at						Yes, but >10% FDR	0.039061	111.482	142.142	19184.4	6.3	143.8	138.72	138.81	132.7	159.23	138.43	147.65	138.05	138.52	135.39	142.91	153.38	109.52
210056_at	Yes	221.881	369.174	14376.7	1.59536	Yes, but >10% FDR	0.0043024	260.666	369.345	9644.37	2.4	374.95	369.39	372.22	343.7	388.02	396.18	365.06	343.22	346.57	398.1	345.85	318.25	256.36
210062_s_at						Yes, but >10% FDR	0.039636	84.109	106.256	4124.37	-0.6	88.18	78.25	83.81	82.6	86.82	84.45	84.1	96.2	81.06	96.2	87.55	100.92	101.76
210095_s_at						Yes, but >10% FDR	0.019736	18531.8	20305.3	2.834	6.3	19503.5	19551.6	20925.9	21365.6	18471.3	18846.4	19242.4	18574	17829.8	18217	18204.4	19189.1	17805.1
210101_x_at						Yes, but >10% FDR	0.035962	916.173	1060.68	77.64	6.3	1088.57	1024.71	1021.16	1100.54	1071.19	1021.16	1120.56	906.4	862.87	999.46	1039.01	883.45	823.71
210111_s_at						Yes, but >10% FDR	0.042591	758.34	843.761	1.239	6.3	813.31	842.19	879.78	772.83	779.28	784.16	779.28	710.16	696.99	786.88	770.69	743.4	786.88
210123_s_at						Yes, but >10% FDR	0.03495	70.094	76.601	3644.37	6.3	79.11	75.58	79.4	79.18	73.77	75.53	77.12	75.74	72.91	78.68	74.23	68.93	70.96
210131_x_at						Yes, but >10% FDR	0.023657	2629.87	3849.35	1664.37	0.3	3556.72	4098.84	3953.73	3678.75	3625.59	3451.48	3640.7	3304	3660.94	2979.8	3461.06	3145.34	2696.74
210176_at						Yes, but >10% FDR	0.030972	96.663	115.819	17144.4	6.3	112.97	120.26	123.55	117.7	112.83	108.46	113.3	111.66	118.69	123.21	115.12	116.65	95.67
210178_x_at						Yes, but >10% FDR	0.04568	699.335	896.375	6344.37	1.2	824.86	840.44	917.14	939.01	923.52	917.14	899.51	849.22	990.49	802.3	842.19	797.31	694.1
210183_x_at	yes	2897.87	3118.67	1.6421	11.6046	Yes, and meet 10%FDR	0.00088228	2900.83	3117.78	1.725	6.3	3091.3	3112.81	3151.89	3061.45	2900.33	2920.5	2920.5	2874.31	2898.32	2878.3	3002.61	2797.65	2888.29
210185_at	Yes	87.3457	127.963	21682.7	-2.57314	Yes, but >10% FDR	0.0040932	86.801	113.975	12584.4	-6	88.28	94.68	77.44	90.51	93.51	85.21	83.98	89.08	84.27	86.4	87.79	92.22	115.68
210220_at						Yes, but >10% FDR	0.011391	95.69	147.386	2264.37	0.6	150.17	143.81	140.17	156.28	131.05	151.8	156.72	129.34	122.96	126.85	125.54	122.45	93.31
210253_at						Yes, but >10% FDR	0.034262	125.321	194.818	17144.4	6.3	197.13	194.01	196.31	235.57	166.23	203.23	206.36	184.44	181.9	190.15	182.91	196.58	122.53
210263_at						Yes, but >10% FDR	0.045707	82.8	107.625	17144.4	-6	83.85	78.36	79.12	90.82	81.29	70.13	77.65	82.14	88.16	85.69	93.38	82.65	108.08
210271_at	Yes	63.814	77.2799	14265.4	-5.5259	Yes, but >10% FDR	0.0089261	63.838	76.662	13724.4	-6	63.7	64	61.69	61.56	65.07	65.94	60.13	65.12	69.5	62.51	62.73	65.48	77.06
210291_s_at						Yes, but >10% FDR	0.042088	83.219	93.944	18644.4	-6	82.48	84.1	86.82	84.98	86.1	79.07	82.94	86.28	79.4	80	84.1	81.23	94.48
210299_s_at	yes	91.8194	11387.6	2.23183e+06	-1.24719	Yes, and meet 10%FDR	0.00017335	92.735	141.169	12044.4	-6	90.64	94.88	92.35	87.06	90.7	81.86	89.08	104.69	93.96	95.34	94.29	104.69	144.01
210312_s_at	Yes	1583.5	1855.48	120.646	1.12618	Yes, but >10% FDR	0.0022918	1582.56	1854.89	127.564	1.2	1871.96	1796.53	1857.31	1834.28	1853.45	1910.85	1801.52	1636.05	1736.54	1533.91	1705.52	1540.3	1541.37
210319_x_at						Yes, but >10% FDR	0.02144	81.374	91.854	464.367	-4.8	85.77	83.81	76.96	76.32	83.69	81.63	86.1	78.52	84.1	91.58	98.5	87.85	90.89
210325_at	yes	156.863	194.676	173.34	-2.81395	Yes, and meet 10%FDR	0.00076113	157.048	193.983	177.621	-3	160.98	142.22	160.9	155.96	174.49	145.31	158.9	167.38	190.28	198.91	192.14	187.79	200.02
210335_at	Yes	88.5624	111.668	2878.89	10.8757	Yes, but >10% FDR	0.001937	87.391	111.978	2684.37	6.3	110.19	103.54	108.38	113.22	108.01	107.86	119.35	119.76	112.44	113.93	92.35	93.25	83.87
210337_s_at						Yes, but >10% FDR	0.048775	3743.68	4717.66	10364.4	6.3	4616.77	4633.86	5293.48	4891.29	4695.29	4365.71	5074.32	4371.76	4633.86	4589.11	4803.93	4287.73	3732.69
210356_x_at	Yes	83.8341	98.9595	437.27	-9.53713	Yes, but >10% FDR	0.0049262	83.832	98.062	464.367	-6	84.93	77.65	79.45	80.56	91.65	89.2	82.08	85.15	86.34	99.46	103.82	97.68	94.88
210372_s_at						Yes, but >10% FDR	0.037225	394.548	512.306	764.367	0.6	469.51	471.46	543.83	525.67	480.7	551.42	500.77	456.03	450.07	452.57	463.36	388.56	414.43
210420_at						Yes, but >10% FDR	0.048746	80.92	99.55	18764.4	-6	86.63	85.39	77.23	89.76	85.04	80.62	79.89	76.43	80.11	84.45	76.85	76.69	100.22
210427_x_at						Yes, and meet 10%FDR	0.0013097	35557.6	37572.9	15044.4	6.3	37739.2	37981.3	37771.2	37849.8	37045.2	37562.4	37745.1	37070.9	37510.3	37484.3	37354.6	37458.4	35437.8
210431_at						Yes, but >10% FDR	0.047456	70.112	78.017	9284.37	-2.4	70.37	73.57	69.12	70.52	66.49	72.91	71.01	66.9	71.7	69.65	71.01	74.23	77.92
210438_x_at						Yes, but >10% FDR	0.019987	1414.07	1755.55	11804.4	6.3	1818.39	1812.79	1892.4	1748.62	1700.8	1696.09	1722.16	1602.38	1775.49	1776.72	1845.76	1665.8	1403.68
210453_x_at						Yes, but >10% FDR	0.046291	6374.27	7217.98	704.367	0.3	7105.24	7460.21	7131.55	6989.63	6912.54	7077.38	7023.62	6589.71	7171.21	6663.2	6850.53	6626.36	6458.57
210456_at	yes	69.0008	37543.6	65675.4	-9.29861	Yes, and meet 10%FDR	0.00033305	68.918	93.171	16904.4	-6	69.57	67.98	68.78	76	69.36	70.57	70.33	64.22	69.5	66.35	67.18	68.17	94.68
210460_s_at						Yes, but >10% FDR	0.0091485	3233.57	3617.98	5444.37	1.2	3643.79	3608.04	3735.28	3696.64	3446.7	3660.94	3588.09	3511.81	3580.64	3595.56	3487.55	3345.49	3272.1
210467_x_at						Yes, but >10% FDR	0.045133	70.735	77.584	824.367	-6	71.68	75.69	65.71	66.72	72.96	67.42	72.05	72.86	69.26	76.74	76.96	78.36	76.8
210471_s_at	yes	67.5217	85.7327	13867.6	-3.31974	Yes, and meet 10%FDR	0.0010384	67.508	83.925	11684.4	-6	67.38	65.03	69.5	67.84	67.98	67.42	66.86	64.4	73.31	65.39	67.79	72.1	84.45
210474_s_at						Yes, but >10% FDR	0.026583	110.462	129.071	127.564	6.3	126.07	141.34	124.93	128.71	114.96	129.34	139.3	119.59	104.98	120.34	110.89	109.59	102.75
210495_x_at						Yes, but >10% FDR	0.018168	6006.42	8457.07	17684.4	6.3	8860.81	9287.02	8995.58	8635.12	7831.1	8593.32	8090.43	8422.31	8689.15	8158	7398.41	8545.8	5955.47
210499_s_at	Yes	118.932	8891.06	55566.6	-8.9519	Yes, but >10% FDR	0.010867	119.001	152.025	16784.4	-6	120.64	119.26	115.44	121.01	117.13	123.47	121.43	129.34	102.39	114.4	124.41	118.27	154.02
210501_x_at						Yes, but >10% FDR	0.03513	12022	13123.5	91.615	1.8	13125.7	12757	13805.9	12520.5	12686.4	13484.4	12881.4	12416.8	12279.8	11828.7	12494.5	11641.6	12211.9
210502_s_at						Yes, but >10% FDR	0.030783	386.832	469.128	247.319	1.5	457.48	465.62	449.44	522.03	433.53	482.37	497.65	417.9	441.42	367.35	436.25	375.85	364.05
210514_x_at						Yes, but >10% FDR	0.0025076	429.905	580.171	884.367	0.3	558.99	557.18	598	578.43	559.89	536.34	527.49	507.41	519.15	519.51	501.12	494.22	425.2
210539_at	Yes	80.4219	3729.9	2.00894e+06	-1.22343	Yes, but >10% FDR	0.0036582	80.613	100.315	11984.4	-6	83.34	82.94	79.34	80.34	76.27	73.01	81.46	85.57	79.56	83.63	81.46	85.57	101.69
210541_s_at						Yes, but >10% FDR	0.0075128	434.577	595.552	4364.37	0.6	589.27	612.26	607.61	600.91	631.22	560.28	596.34	510.23	586.1	555.64	544.2	501.12	438.67
210547_x_at						Yes, but >10% FDR	0.020007	255.843	354.444	13484.4	6.3	362.93	375.07	344.18	321.35	339.67	376.63	371.19	360.54	341.32	387.22	318.69	342.03	251.6
210567_s_at						Yes, but >10% FDR	0.038676	100.857	123.556	9464.37	6.3	121.27	117.05	129.88	114.25	125.19	131.78	119.1	127.73	117.7	133.62	127.29	110.2	100.99
210576_at						Yes, but >10% FDR	0.022515	69.57	73.989	1.462	-1.5	70.49	67.42	72.3	70.62	74.03	73.47	75.43	73.06	73.57	73.16	73.77	72.76	76
210583_at	Yes	64.8836	225.089	54331.4	-4.18075	Yes, but >10% FDR	0.015323	64.532	76.937	16004.4	-6	64.99	65.34	64	69.07	59.92	68.88	62.94	65.34	65.71	63.16	64.36	65.03	77.23
210597_x_at						Yes, but >10% FDR	0.024804	82.137	144.853	12584.4	-6	76.99	67.88	76.16	70.57	94.81	70.03	80.95	109.97	103.9	79.73	94.88	94.55	147.24
210613_s_at						Yes, but >10% FDR	0.020271	109.898	123.205	65.796	6.3	126.31	123.55	120.43	120.09	128.98	116.81	128.36	104.84	116.4	104.84	116.73	103.9	112.67
210615_at	Yes	85.6538	100.325	399.318	-17.7601	Yes, but >10% FDR	0.010061	86.019	100.998	464.367	-6	87.71	83.17	92.54	79.07	82.88	83.29	95.34	81.23	88.71	103.68	98.84	99.25	99.53
210620_s_at						Yes, but >10% FDR	0.033838	139.823	185.243	3464.37	0.9	179.31	194.01	167.5	191.61	185.59	209.96	176.93	168.08	172.21	177.17	169.13	148.36	144.51
210647_x_at	Yes	116.298	3100.36	592260	-1.52225	Yes, but >10% FDR	0.010588	115.878	146.323	13304.4	-6	119.42	116.57	116.81	109.52	113.69	116.89	126.76	120.34	104.84	113.69	123.81	120.43	147.95
210648_x_at						Yes, but >10% FDR	0.021975	6813.44	7703.6	7844.37	6.3	7654.01	7701.91	8300.6	7455.04	8051.27	7574.84	7696.57	7455.04	7771.62	7480.92	7766.24	6975.11	6784.37
210654_at						Yes, but >10% FDR	0.029054	103.063	134.885	16604.4	6.3	137.95	143.51	134.36	132.7	122.11	141.14	137.09	131.42	130.51	148.78	125.11	134.55	102.11
210656_at						Yes, but >10% FDR	0.044434	64.053	73.764	8984.37	2.1	73.16	74.54	74.39	80.17	72.45	74.34	69.99	71.36	73.26	77.12	71.36	68.93	63.91
210665_at						Yes, but >10% FDR	0.044381	106.954	132.461	4544.37	0.9	129.71	141.34	144.91	124.76	130.42	128.44	125.19	130.42	127.12	132.33	116.4	120.93	107.56
210674_s_at	Yes	121.457	178.998	11792.7	1.41695	Yes, but >10% FDR	0.0036354	133.559	178.286	8264.37	1.8	177.01	188.84	173.53	172.69	171.97	167.38	181.52	189.36	192.4	173.65	169.25	154.45	133.34
210675_s_at						Yes, but >10% FDR	0.036503	79.449	89.027	108.105	-6	85.02	82.54	79.51	76.85	81.35	72.35	77.33	85.63	93.83	81.69	91.01	91.01	87.67
210677_at	Yes	66.242	88.1708	87792	-0.210995	Yes, but >10% FDR	0.0064667	68.499	75.451	884.367	-6	66.12	65.66	69.07	68.07	70.23	71.16	68.5	69.99	67.65	74.08	76.53	72.05	76.64
210680_s_at	yes	72.1521	99.8105	4250.37	-0.671352	Yes, and meet 10%FDR	9.7783e-05	72.485	94.336	2084.37	-0.9	73.16	73.06	75.27	69.94	75.37	67.28	71.85	74.08	78.74	79.78	86.52	86.94	95.27
210715_s_at						Yes, and meet 10%FDR	0.00076658	4765.85	6340.9	14864.4	6.3	6474.51	6225.61	6807.93	6067.98	6034.42	6208.38	6247.23	6472.02	6229.93	6365.24	6498.99	6242.9	4643.51
210738_s_at	yes	46.8383	77.5006	26773.7	1.17641	Yes, and meet 10%FDR	0.0012892	61.472	77.126	10364.4	2.7	74.81	77.44	76.53	78.79	76.96	76.9	81.18	80.28	72.76	78.74	74.65	70.23	61.14
210739_x_at						Yes, but >10% FDR	0.032566	107.541	135.883	65.796	-6	104.05	109.67	114.64	106.15	112.99	102.04	103.39	146.12	150.85	107.49	131.23	126.33	146.12
210751_s_at						Yes, but >10% FDR	0.033933	67.555	83.705	12524.4	-6	65.93	67.23	64.27	68.21	72.76	67.74	60.21	72.66	73.67	67.88	67.37	70.91	84.16
210761_s_at						Yes, but >10% FDR	0.036524	106.603	146.413	17684.4	6.3	158.38	154.77	139.49	166.57	137.66	141.93	141.04	145.82	140.85	138.72	133.81	150.12	103.97
210766_s_at						Yes, but >10% FDR	0.025484	3328.82	3616.61	77.64	6.3	3602.77	3543.6	3580.64	3748.25	3389.84	3694.08	3709.48	3308.59	3354.77	3531.34	3285.73	3269.83	3244.99
210783_x_at	Yes	75.3445	103.207	13994.1	-7.69268	Yes, but >10% FDR	0.0074884	75.043	102.441	14864.4	-6	75.1	78.14	82.25	75.01	70.72	85.92	73.62	75.48	69.55	74.59	68.4	77.23	103.18
210794_s_at	yes	67.42	249.739	35602.7	-9.61783	Yes, and meet 10%FDR	0.001363	67.123	95.088	17684.4	-6	70.19	69.55	65.84	75.43	68.31	66.17	67.51	65.62	71.01	65.25	59.8	64.36	96.87
210803_at						Yes, but >10% FDR	0.021728	81.441	100.473	17144.4	-6	81.18	79.67	78.19	76.69	85.87	86.94	83.63	75.06	79.18	88.89	82.2	81.01	101.06
210816_s_at						Yes, but >10% FDR	0.026827	83.074	89.853	33.937	5.1	92.18	89.08	88.89	85.33	90.32	91.65	85.39	80.84	81.74	85.21	85.09	87	80.23
210820_x_at						Yes, but >10% FDR	0.021772	182.522	240.422	1904.37	0.6	244.76	248.83	219.64	234.1	239.52	239.35	249	227.07	219.03	209.38	200.71	226.44	177.05
210827_s_at	Yes	-6064.86	1574.85	36531.1	13.0476	Yes, but >10% FDR	0.0045763	1072.26	1587.7	18044.4	6.3	1628.26	1491.97	1489.9	1774.26	1487.84	1594.62	1511.75	1579.22	1601.27	1555.32	1519.1	1664.65	1031.84
210830_s_at						Yes, but >10% FDR	0.048985	7375.04	8271.37	13304.4	6.3	8299.96	8329.42	8743.53	8073.62	8079.22	8006.74	8451.55	8254.7	8335.19	8174.98	7891.04	8152.35	7337.13
210837_s_at						Yes, but >10% FDR	0.0077947	80.262	91.472	2684.37	6.3	87.97	89.2	90.07	86.7	95.6	91.52	93.18	96.47	91.71	93.57	82.6	82.37	78.85
210844_x_at						Yes, but >10% FDR	0.0064846	3654.71	4689.59	15224.4	6.3	4813.19	4637.08	4956.14	4793.95	4451.27	4938.99	4573.24	4608.24	4666.1	4724.68	4308.59	4637.08	3610.54
210849_s_at						Yes, but >10% FDR	0.026215	178.325	238.702	11624.4	6.3	240.26	228.65	240.18	224.1	224.26	215.42	241.35	233.29	259.93	255.65	259.21	221.94	174.97
210855_at						Yes, but >10% FDR	0.031023	63.127	68.313	65.796	6.3	69.33	67.18	67	65.07	70.86	70.96	68.36	61.31	60.8	65.16	63.78	62.64	66.35
210859_x_at						Yes, but >10% FDR	0.03523	295.036	375.068	2144.37	6.3	389.91	345.85	352.38	425.5	362.79	370.93	433.83	358.79	346.09	392.62	295.09	322.02	263.38
210872_x_at						Yes, but >10% FDR	0.046543	66.451	73.654	11144.4	-2.4	70.45	67.98	65.89	66.44	67.04	64.27	64.94	64	67.84	64.98	68.07	69.17	73.67
210874_s_at						Yes, but >10% FDR	0.048895	101.283	119.696	10964.4	-2.7	101.45	105.64	99.8	109.29	98.36	92.86	107.04	96	104.98	99.11	105.49	108.31	120.51
210910_s_at						Yes, but >10% FDR	0.015163	175.73	254.334	3224.37	0.6	246.04	268.91	289.01	241.35	247.45	241.86	253.88	224.26	256.36	214.08	222.24	214.38	175.95
210922_at						Yes, but >10% FDR	0.028226	87.794	105.584	2324.37	-0.6	87.36	88.28	88.4	77.71	90.82	88.4	95.87	95.27	87.37	94.09	95.01	103.39	103.11
210946_at						Yes, but >10% FDR	0.037942	555.931	702.611	10244.4	6.3	710.16	701.84	771.76	671.85	745.98	713.61	711.15	673.72	701.35	626.86	725.08	633.41	563
210949_s_at	Yes	6181.39	7034.43	876.832	0.307593	Yes, but >10% FDR	0.014174	6236.47	7070.45	404.367	0.3	6976.18	7023.62	6883.85	7211.08	6704.9	6893.4	6855.28	6553.27	6653.97	6498.99	6704.9	6603.43	6234.25
210950_s_at						Yes, but >10% FDR	0.0099607	2996.46	3387.1	77.64	2.1	3264.29	3385.14	3290.29	3635.66	3171.61	3468.27	3278.91	3136.63	2940.81	3087.02	3036.09	2951.02	2996.37
210959_s_at						Yes, but >10% FDR	0.031231	115.182	145.13	7844.37	6.3	146.81	134.27	169.48	140.46	142.22	138.72	147.85	152.11	139.49	145.82	148.06	120.51	114.56
210981_s_at	Yes	148.973	232.13	12947.8	-7.68704	Yes, but >10% FDR	0.0025604	149.29	227.05	13724.4	-6	139.76	133.9	153.7	167.73	170.54	142.72	128.8	144.51	159.56	150.96	146.52	159.01	232
211005_at	Yes	76.3183	146.639	95895.9	-1.08809	Yes, but >10% FDR	0.0029859	76.691	91.015	11204.4	-6	78.76	78.63	76	74.91	73.06	75.43	80.78	75.79	72.86	76.9	79.29	81.46	91.84
211016_x_at	Yes	436.475	535.39	611.817	1.2501	Yes, but >10% FDR	0.0017075	442.051	536.066	524.367	1.5	500.27	540.82	544.58	553.33	522.03	514.85	573.24	524.21	491.48	468.21	452.88	459.84	414.15
211025_x_at						Yes, but >10% FDR	0.017458	4694.21	5182.91	91.615	5.7	5019.13	5184.54	5434.76	5282.48	4990.61	5278.82	5198.93	4774.06	4688.79	4608.24	5011.41	4299.64	4803.93
211047_x_at	Yes	5779.1	6463.05	229.533	0.646367	Yes, but >10% FDR	0.0062494	5937.03	6458.23	55.76	3	6414.46	6347.62	6612.59	6251.56	6535.13	6553.27	6286.32	5988.59	6009.38	6225.61	5724.76	5988.59	5685.22
211057_at						Yes, but >10% FDR	0.043618	82.441	92.908	209.592	-6	86.08	85.69	76.27	83.92	79.07	89.7	83.81	77.17	95.14	92.09	85.98	98.43	96
211060_x_at	Yes	499.984	926.79	21780	0.887578	Yes, but >10% FDR	0.016995	683.835	924.636	6764.37	1.5	962.81	1040.46	839.86	885.29	861.08	906.4	978.89	936.41	929.94	874.31	864.07	785.79	682.65
211063_s_at	Yes	200.44	234.575	-6203.13	1	No		222.797	251.291	2.402	6.3	215.57	252.3	291.63	254.06	209.38	200.44	237.7	254.41	224.41	224.1	256.89	206.36	200.71
211066_x_at	yes	92.4948	1097.65	81860.7	-3.28958	Yes, and meet 10%FDR	0.00042932	92.723	125.75	16004.4	-6	98.89	90.07	89.88	89.33	85.69	91.71	90.76	97.88	98.43	90.32	94.62	93.38	128.18
211067_s_at	Yes	74.1309	342.527	42483.9	-7.09645	Yes, but >10% FDR	0.0048952	74.248	95.044	17684.4	-6	71.57	73.52	70.23	83.87	74.59	71.8	74.29	76.8	73.26	71.95	74.08	73.62	95.08
211089_s_at						Yes, but >10% FDR	0.040744	70.474	76.113	464.367	-5.7	70.33	73.11	75.48	69.99	71.31	68.17	66.3	68.93	71.9	77.6	74.75	76.48	75.9
211094_s_at						Yes, but >10% FDR	0.03224	85.578	119.223	12944.4	6.3	121.04	137	108.53	111.89	108.99	125.37	121.85	126.15	121.77	121.85	110.58	113.54	83.46
211120_x_at	yes	64.1407	399.74	41703.1	-8.41135	Yes, and meet 10%FDR	0.0010121	63.838	82.534	17564.4	-6	62.73	64.58	67.09	67.28	67.46	59.38	64.22	63.65	61.99	63.29	66.03	61.99	83.92
211126_s_at						Yes, but >10% FDR	0.020782	148.472	173.534	14.834	1.2	156.27	173.65	181.27	181.77	156.72	166.46	151.38	152.96	152.22	152.11	140.85	143.41	150.85
211127_x_at	Yes	64.45	69.2409	-15376.8	1	No		68.611	73.243	65.796	6.3	73.94	72.55	67.65	73.36	64.45	82.14	74.18	64.94	69.99	71.61	68.4	69.65	67.7
211128_at	Yes	64.26	1000.15	1.79752e+08	-0.464241	Yes, but >10% FDR	0.0064261	64.121	82.288	6104.37	-0.6	64.81	63.25	65.71	64.67	63.47	64.27	61.69	68.59	65.75	69.36	74.03	68.03	82.25
211137_s_at	Yes	93.83	100.303	-15210	1	No		98.165	109.429	0.33	6.3	104.19	113.3	99.04	98.98	94.42	93.83	100.08	104.26	96.54	102.25	98.36	96.27	95.14
211138_s_at	Yes	96.8341	1583.72	43128.5	-10.3942	Yes, but >10% FDR	0.014463	96.837	129.641	19004.4	-6	92.14	105.13	97.21	90.57	111.12	90.01	99.25	98.29	99.66	97.61	90.2	90.82	130.24
211145_x_at	yes	69.606	80.7219	165.271	-1.03276	Yes, and meet 10%FDR	0.0013411	69.508	79.206	65.796	-6	71.22	73.36	68.12	69.12	67.93	69.02	69.07	79.84	73.98	77.82	82.54	80.67	80.39
211153_s_at						Yes, but >10% FDR	0.045488	71.226	80.317	108.105	-5.4	72.33	74.75	65.03	73.21	72.4	70.38	66.49	76.48	83.11	80.78	89.82	76.96	74.18
211157_at						Yes, and meet 10%FDR	0.0010545	140.062	199.964	12704.4	-6	136.97	132.33	139.39	142.52	132.51	133.9	141.53	142.81	131.69	156.5	156.06	151.48	203.09
211167_s_at	yes	64.1624	348.364	37261.6	-9.24034	Yes, and meet 10%FDR	0.00031461	63.048	95.761	17144.4	-6	66.16	61.61	61.35	64.31	65.39	70.08	70.91	62.03	62.77	63.73	60.34	61.27	97.95
211185_s_at						Yes, but >10% FDR	0.022146	2166.25	2383.32	3.946	6.3	2281.87	2289.79	2471.21	2509.18	2227.18	2259.83	2123.16	2078.03	2208.73	2194.99	2089.58	2216.4	2179.83
211189_x_at						Yes, but >10% FDR	0.02444	83.911	98.305	7244.37	-2.1	85.34	85.39	79.51	82.14	89.88	81.4	80.56	87.24	87.12	77.98	87.79	92.99	97.95
211203_s_at						Yes, but >10% FDR	0.028566	2562.95	3448.58	3764.37	0.9	3235.01	3299.43	4042.41	3568.25	3403.96	3331.6	3249.5	3628.1	3169.41	3315.48	3078.47	2745.78	2672.55
211208_s_at	Yes	-35408.5	709.391	1.13305e+07	0.879762	Yes, but >10% FDR	0.014822	507.692	701.78	12944.4	3.6	713.78	703.79	753.26	717.08	725.58	712.13	749.61	600.08	688.35	710.16	675.12	648.07	512.71
211221_at	Yes	67.7077	7348.31	9.89053e+06	-1.03617	Yes, but >10% FDR	0.0028809	67.654	84.651	11444.4	-6	67.35	63.29	69.6	69.12	67.84	64.13	64.76	71.41	72.2	69.36	68.74	72.91	85.63
211225_at	yes	69.4397	86.467	12557.3	-7.06437	Yes, and meet 10%FDR	0.0012015	69.148	85.252	12704.4	-6	70.17	69.55	67.09	71.85	71.11	72.86	67.18	64.98	70.57	70.77	67.7	72.2	86.46
211253_x_at	Yes	104.318	147.69	1090.42	-0.836759	Yes, but >10% FDR	0.0053578	104.804	148.287	1184.37	-0.9	110.71	92.16	105.79	100.85	116.65	100.64	104.91	110.81	127.38	112.91	135.3	157.48	134.83
211272_s_at						Yes, but >10% FDR	0.047891	75.704	85.139	77.64	0.6	83.93	89.82	78.68	87.31	84.62	79.56	84.21	78.96	75.9	80.95	73.87	78.63	73.62
211282_x_at						Yes, but >10% FDR	0.048627	97.589	113.075	0.459	6.3	102.73	125.63	104.04	103.11	95.54	99.94	100.08	95.54	98.02	96.2	98.5	99.18	92.93
211285_s_at						Yes, but >10% FDR	0.049437	1023.68	1263.6	17684.4	-6	1055.87	952.12	1040.46	1115.91	1024	961.4	1111.27	944.23	958.74	1087.65	1048.42	1009.9	1271.22
211296_x_at						Yes, but >10% FDR	0.044567	28053.9	29086	584.367	2.4	29139.1	29065.1	28824.3	29226.7	29186.2	29065.1	29430	28526.2	28884.3	28348.8	27194	28844.3	27958.5
211302_s_at						Yes, but >10% FDR	0.0016333	182.008	283.1	5144.37	2.7	278.03	292.64	270.03	294.68	251.6	278.01	283.85	330.16	292.85	281.5	257.6	197.81	183.16
211312_s_at						Yes, but >10% FDR	0.042138	70.419	75.58	9.029	-6	72.18	70.57	71.8	66.67	69.55	75.32	74.8	78.47	74.65	73.82	79.34	71.75	75.37
211313_s_at	Yes	84.3924	1049.42	40361.8	-9.42066	Yes, but >10% FDR	0.0040025	84.022	137.832	17144.4	-6	80.49	82.48	89.08	76.21	86.34	74.96	73.72	92.35	105.35	79.01	90.07	82.65	139.97
211318_s_at	Yes	728.1	944.961	10297.9	26.0835	Yes, but >10% FDR	0.011855	735.25	947.543	11144.4	6.3	909.82	960.07	962.07	854.54	989.12	915.87	938.36	958.08	907.65	990.49	1008.5	876.13	728.1
211326_x_at	Yes	156.283	182.86	1268	1.01048	Yes, but >10% FDR	0.0038812	157.295	182.439	1184.37	1.2	187.89	175.95	178.9	182.53	179.4	184.18	194.96	177.42	174.01	169.84	168.78	152.96	160.01
211327_x_at	yes	150.883	167.095	20.9604	4.60082	Yes, and meet 10%FDR	5.4154e-05	151.319	167.1	20.655	4.8	167.21	167.5	166.92	166.34	167.5	165.08	151.59	150.54	144.41	152.85	152.75	155.96	148.78
211345_x_at						Yes, but >10% FDR	0.027147	16612.2	18054.8	5384.37	6.3	17924.8	18445.7	18768.2	17450.7	18242.3	17438.6	18053.6	17633.1	18484.1	17608.7	18103.7	16293.4	16798
211350_s_at	Yes	81.0353	91.9096	263.452	2.62479	Yes, but >10% FDR	0.0069799	80.737	91.704	291.836	2.7	94.13	91.46	85.39	96.34	96.8	87	92.09	90.7	84.1	81.63	81.29	82.31	79.23
211368_s_at						Yes, but >10% FDR	0.048895	64.017	71.34	4064.37	6.3	70.76	66.63	74.18	71.01	72.55	72.5	70.28	68.36	70.47	76.59	69.65	63.73	63.96
211372_s_at						Yes, but >10% FDR	0.027575	295.453	357.622	0.89	6.3	333.55	361.79	378.2	276.67	330.16	290.82	289.82	299.21	314.3	289.42	310.19	299.83	250.21
211376_s_at						Yes, but >10% FDR	0.036211	1630.4	1963.24	644.367	0.6	1884.83	1852.17	2182.85	1904.24	1944.25	1908.2	1955.06	1752.26	1829.2	1814.05	1781.65	1669.27	1632.65
211397_x_at	Yes	86.5667	152.951	6874.38	-0.868532	Yes, but >10% FDR	0.0019738	85.889	145.445	4784.37	-0.9	82.6	89.26	85.81	76.48	107.11	88.16	79.01	84.27	89.45	109.36	99.39	130.24	137.19
211399_at	Yes	73.2732	5913.42	58862.9	-8.54356	Yes, but >10% FDR	0.015156	73.464	90.889	18044.4	-6	73.74	76.21	70.23	78.3	69.84	76.37	73.26	79.34	67.32	70.91	72.15	71.61	91.65
211404_s_at						Yes, but >10% FDR	0.021716	459.432	606.261	644.367	0.6	569.24	576.03	680.76	577.23	628.6	574.04	600.91	546.85	514.85	517.35	564.96	476.06	439.28
211410_x_at						Yes, but >10% FDR	0.026145	101.729	140.614	55.76	-6	101.95	107.86	101.13	85.87	128.53	89.08	104.98	157.59	135.3	109.97	161.12	153.49	137.28
211423_s_at						Yes, but >10% FDR	0.043126	254.725	360.51	3764.37	0.6	347.42	376.37	418.48	364.56	316.71	357.3	345.37	348.5	354.1	308.9	299.83	327.19	257.42
211429_s_at	yes	68.074	344.686	40221.7	-7.16603	Yes, and meet 10%FDR	0.00075814	67.744	96.833	16604.4	-6	67.48	63.69	67.93	69.74	67.56	61.91	67.28	68.36	77.82	68.17	69.31	67.65	98.22
211433_x_at	Yes	122.822	152.319	4574.33	-4.02123	Yes, but >10% FDR	0.0036966	122.242	154.026	4964.37	-3.3	120.93	118.6	126.24	121.77	109.06	120.76	134.27	124.76	130.78	121.1	129.34	150.96	152.43
211458_s_at	Yes	568.032	644.788	39.7875	14.7286	Yes, but >10% FDR	0.0053396	565.237	645.212	40.046	6.3	635.81	661.68	610.99	640.92	667.21	652.12	596.76	559.5	613.53	550.27	530.79	582.05	572.05
211474_s_at	Yes	1951.93	2241.75	42.4402	18.1692	Yes, but >10% FDR	0.0028116	1951.92	2251.72	47.254	5.4	2215.03	2329.82	2299.33	2196.51	2075.15	2334.67	2134.97	1875.42	2015.61	2010.03	1971.39	1972.76	1866.35
211475_s_at						Yes, but >10% FDR	0.02052	1867.61	2070.03	47.254	5.7	2014.52	2012.82	2101.2	2080.91	2045.16	2155.79	1990.62	1780.42	2022.61	1897.65	1766.89	1928.15	1841.93
211496_s_at	Yes	66.916	121.501	1.13896e+06	-0.399513	Yes, but >10% FDR	0.0062543	67.598	78.104	5444.37	-1.5	68.41	66.17	66.44	63.69	69.7	66.03	70.23	70.77	67.7	69.31	70.18	75.85	76.85
211500_at	Yes	94.3413	133.17	17984.9	-2.43605	Yes, but >10% FDR	0.012192	94.83	123.719	12044.4	-6	99.17	105.35	90.07	90.57	90.7	104.4	90.57	85.45	93.64	93.38	95.14	101.83	124.5
211503_s_at						Yes, but >10% FDR	0.040362	609.58	708.594	944.367	6.3	635.81	656.2	749.09	681.7	748.57	720.07	691.7	703.79	761.66	634.29	596.34	630.78	602.58
211504_x_at						Yes, but >10% FDR	0.03286	239.438	283.068	33.937	-6	252.69	237.87	252.3	211.86	267.24	216.32	273.99	295.5	279.17	270.97	265.58	274.75	304.02
211517_s_at	Yes	65.9166	3384.25	53765.1	-9.24299	Yes, but >10% FDR	0.01056	65.59	80.477	18644.4	-6	65.85	67	64.67	65.34	67.42	71.8	66.07	65.84	60.46	65.3	68.26	62.99	80.95
211528_x_at						Yes, but >10% FDR	0.0036799	918.835	1100.2	944.367	6.3	1174.28	1129.13	1096.74	1120.56	1024	1051.33	1112.82	1057.91	1151.26	966.75	903.89	981.61	878.56
211532_x_at						Yes, but >10% FDR	0.041865	67.648	76.621	77.64	-6	68.25	65.53	68.88	61.61	70.86	72.55	62.77	78.41	83.81	73.47	72.71	78.47	72.86
211538_s_at	Yes	144.941	207.084	7437.31	1.97074	Yes, but >10% FDR	0.014559	144.407	211.443	6764.37	1.8	218.95	195.63	210.26	175.46	213.19	212.9	215.72	216.17	196.45	217.07	193.21	168.31	148.26
211545_at						Yes, but >10% FDR	0.037118	72.495	91.897	19184.4	-6	74.81	76.9	68.83	76.69	73.16	74.39	73.01	72.76	77.65	78.47	65.3	64.89	93.12
211549_s_at	Yes	-7882.09	2143.04	1.5406e+06	0.670858	Yes, but >10% FDR	0.01346	1491.74	2127.22	8564.37	1.8	2083.16	1986.48	2111.42	2392	2190.43	1974.13	2331.43	2022.61	2188.91	1951	2043.75	1800.27	1477.56
211552_s_at	Yes	76.2765	91.6446	1224.24	-0.878569	Yes, but >10% FDR	0.0018897	76.786	92.074	1484.37	-0.9	77.03	78.41	72.45	75.48	79.67	79.67	70.52	79.29	81.29	83.4	87.67	87.67	92.03
211561_x_at						Yes, but >10% FDR	0.014586	130.659	146.217	65.796	6.3	149.27	141.04	140.85	148.67	143.71	154.99	149.6	124.41	133.53	132.51	141.53	129.52	123.13
211569_s_at						Yes, but >10% FDR	0.042616	242.527	360.986	9464.37	6.3	379.75	367.09	431.44	404.5	360.54	356.56	335.93	342.75	313.65	335.93	395.35	291.03	245.23
211576_s_at	Yes	112.659	191.184	29267.3	-1.67647	Yes, but >10% FDR	0.0028079	113.504	151.034	11804.4	-6	114.78	106.52	102.82	125.89	120.09	112.28	110.43	110.97	114.33	107.11	116.65	123.55	152.75
211580_s_at	Yes	70.1833	1834.34	48763	-9.52098	Yes, but >10% FDR	0.0057274	70.247	86.283	18404.4	-6	71.09	72.15	69.7	68.78	68.74	74.8	65.12	72.81	70.42	67.88	73.57	67.14	87.31
211597_s_at						Yes, but >10% FDR	0.021896	72.012	98.737	18164.4	-6	70.7	68.88	72.3	68.26	70.82	68.83	64.53	87.06	75.69	74.49	71.01	72.1	97.68
211599_x_at						Yes, but >10% FDR	0.01763	1466.68	1604.02	3524.37	6.3	1593.4	1592.41	1704.34	1591.31	1600.16	1601.27	1565.06	1584.71	1606.83	1610.17	1548.87	1418.35	1514.89
211603_s_at	Yes	102.209	133.991	10703.3	-10.7903	Yes, but >10% FDR	0.0067495	102.788	132.283	11264.4	-6	104.69	108.53	97.07	104.26	102.32	92.67	108.31	95.41	109.97	105.2	95.87	112.52	133.99
211605_s_at						Yes, but >10% FDR	0.027382	69.519	86.389	18044.4	-6	70.79	71.8	78.68	64.45	66.95	72.2	71.21	69.84	68.88	69.12	65.84	69.02	86.22
211615_s_at						Yes, but >10% FDR	0.04694	2066.7	2252	65.796	6.3	2276.25	2230.27	2297.74	2323.36	2253.58	2127.58	2280.29	1938.87	2000.3	2255.14	2133.49	2004.46	2026.82
211617_at						Yes, but >10% FDR	0.028927	62.487	75.757	65.796	-6	65.05	61.95	67.7	61.95	63.47	57.52	61.35	80.39	78.09	78.52	69.5	63.78	80.34
211624_s_at						Yes, but >10% FDR	0.028226	80.78	97.19	13964.4	-6	77.89	74.65	87.24	78.52	76.64	82.88	80.9	77.92	84.98	85.45	82.08	82.71	97.88
211634_x_at						Yes, but >10% FDR	0.019344	65.725	71.418	127.564	6.3	72.93	70.03	68.74	72.2	72.1	72.45	71.11	69.41	61.78	67.56	63.43	69.7	63.43
211653_x_at						Yes, but >10% FDR	0.035573	29062.4	29494	77.64	6.3	29416.4	29430	29389.2	29389.2	29758.2	29573.1	29634.7	29024.8	29450.4	28784.4	29166	28864.3	29145.8
211659_at	Yes	86.0394	153.382	218441	-0.370653	Yes, but >10% FDR	0.0032113	86.74	108.958	2324.37	-0.6	88.73	86.04	84.51	86.58	89.33	87.85	79.51	93.7	97.14	95.8	94.42	101.62	108.68
211661_x_at						Yes, but >10% FDR	0.017936	95.688	130.483	7064.37	-3	98.47	83.98	98.91	84.98	116.73	92.28	99.73	93.12	95.8	99.39	98.56	121.6	129.43
211662_s_at						Yes, but >10% FDR	0.0083597	9637.49	10915	3704.37	0.6	10761.2	11051.9	10824.4	11128.7	10824.4	11121	10846.9	10839.4	10162.7	10412.3	10579.6	10304.6	9688.11
211666_x_at						Yes, but >10% FDR	0.0045463	11877.3	13150.3	13724.4	6.3	13287.5	13354.1	12989	13428.4	12748.1	13465.7	13206.9	13179.4	12935.1	12890.3	13097.5	13007	11795.9
211668_s_at						Yes, and meet 10%FDR	3.9369e-06	1449.95	3029.47	11864.4	-6	1400.33	1302.44	1592.41	1495.07	1494.04	1400.77	1413.44	1324.29	1328.88	1546.72	1647.43	1861.18	3138.81
211692_s_at						Yes, but >10% FDR	0.027876	197.344	285.785	18764.4	-6	193.12	197.81	201.69	231.68	163.14	230.56	196.99	187.27	202.11	196.45	171.49	187.14	285.63
211697_x_at						Yes, but >10% FDR	0.028535	483.073	657.52	12704.4	-6	461.05	461.12	489.44	449.13	493.19	408.73	511.29	456.67	535.6	556.79	513.42	515.92	664.9
211700_s_at						Yes, but >10% FDR	0.042138	63.241	69.44	644.367	6.3	71.6	68.5	67.98	73.67	69.36	67.98	66.3	67.04	70.18	62.21	66.9	59.71	63.78
211704_s_at	Yes	-395.664	146.079	39343.9	10.211	Yes, but >10% FDR	0.011555	115.807	145.455	18764.4	6.3	143.81	141.53	144.01	151.38	141.24	154.45	149.81	143.61	142.52	152.64	135.2	152.75	114.17
211705_s_at	Yes	76.8708	397.043	56908	-4.12148	Yes, but >10% FDR	0.005123	76.547	96.999	15824.4	-6	80.49	79.23	76.74	77.39	75.48	77.06	79.07	72.71	75.11	82.88	69.26	77.28	98.22
211715_s_at	Yes	251.861	301.979	2820.63	1.17979	Yes, but >10% FDR	0.00194	256.208	299.288	3884.37	6.3	307.86	310.4	298.17	287.82	298.79	310.19	304.65	298.79	296.73	282.67	287.42	246.08	262.1
211716_x_at						Yes, but >10% FDR	0.023632	678.284	815.365	16604.4	-6	707.76	738.27	643.59	672.32	704.77	657.57	623.39	695.54	676.06	665.83	681.23	680.29	818.59
211719_x_at						Yes, but >10% FDR	0.039244	7491.62	9524.8	1244.37	0.3	9376.86	10008.9	9416.66	9358.1	8522.14	9254.89	8804.35	9008.06	8463.27	8896.36	7940.42	8927.25	7659.32
211720_x_at	yes	29085.3	31293.2	9557.14	16.2822	Yes, and meet 10%FDR	0.0010099	28959.4	31282.2	9164.37	6.3	31416.2	32004.8	30850.4	31651.8	30957.5	31367.9	31346.1	31129.6	30850.4	31108	31542.3	29799.5	29085.2
211752_s_at						Yes, but >10% FDR	0.013879	401.464	469.168	77.64	6.3	466.19	461.44	493.87	468.21	432.63	468.21	484.72	393.99	415.59	405.06	404.22	443.87	357.3
211755_s_at						Yes, but >10% FDR	0.034398	5599.67	6198.87	3584.37	2.1	6056.77	6114.42	6544.19	5996.9	6059.57	6144.16	6409.52	6021.89	6334.43	6063.77	5967.87	5595.3	5681.28
211759_x_at	Yes	2736.55	3398.41	2052.35	0.581865	Yes, but >10% FDR	0.0047701	2743.76	3388.05	2144.37	0.6	3374.47	3364.09	3477.9	3463.46	3361.76	3263.04	3399.25	3162.83	3258.52	3182.62	3147.52	2657.77	2977.74
211772_x_at						Yes, and meet 10%FDR	0.00032798	69.925	76.904	127.564	6.3	75.12	79.89	75.64	78.03	74.85	75.95	76.8	73.93	69.45	70.67	69.6	69.65	69.99
211779_x_at	Yes	769.911	994.229	12.933	1.08246	Yes, but >10% FDR	0.0060763	764.158	986.545	17.504	1.2	965.93	1033.27	962.07	1032.55	863.47	899.51	890.83	709.67	703.79	715.1	817.46	857.5	781.44
211800_s_at						Yes, but >10% FDR	0.017866	297.03	361.597	77.64	6.3	343.91	362.04	347.29	386.41	309.97	396.18	381.09	285.83	300.45	312.78	296.11	315.61	277.05
211816_x_at						Yes, but >10% FDR	0.044621	63.048	69.167	1544.37	6.3	68.28	71.41	63.91	69.41	67.88	71.21	68.31	71.11	70.57	68.64	60.97	64.85	64.31
211831_s_at	Yes	72.4129	81.816	118.902	-19.6472	Yes, but >10% FDR	0.0042592	72.484	81.31	108.105	-6	72.59	74.29	71.11	71.16	75.53	72.61	69.6	78.79	78.47	86.94	83.81	77.55	82.31
211842_s_at						Yes, but >10% FDR	0.040912	65.69	74.62	291.836	-0.6	70.35	65.8	63.87	61.95	69.17	63.91	70.82	69.5	70.52	72.2	69.45	74.96	74.85
211852_s_at	Yes	574.58	703.311	244.338	524.788	Yes, but >10% FDR	0.01241	563.299	701.123	247.319	6.3	681.7	735.2	681.7	717.08	650.32	717.08	735.71	707.7	574.04	597.58	554.87	661.23	484.72
211858_x_at						Yes, but >10% FDR	0.047803	6637.56	7115.72	77.64	6.3	7087.2	7332.05	6970.28	7043.13	6630.95	7206.09	7470.56	6498.99	6598.85	6864.79	6635.55	6562.36	6649.36
211867_s_at	Yes	63.675	260.569	40646.7	-8.67559	Yes, but >10% FDR	0.0043477	63.173	75.994	18104.4	-6	64.5	66.12	62.16	65.39	66.9	64.04	65.53	63.12	61.52	61.99	61.65	61.18	76.85
211893_x_at						Yes, but >10% FDR	0.04096	72.796	90.81	13124.4	-6	72.63	71.01	74.08	65.39	80	64.4	71.8	76.59	76.59	74.03	76.74	75.74	91.77
211911_x_at						Yes, but >10% FDR	0.02175	1416.57	1892.43	4004.37	0.9	1916.75	2096.84	1840.65	1937.53	1668.11	1960.49	1970.03	1706.71	1806.52	1831.74	1675.06	1582.51	1436.16
211915_s_at	Yes	71.9542	123.504	31101.4	-12.1777	Yes, but >10% FDR	0.002861	71.663	90.901	19004.4	-6	70.8	73.82	70.62	74.54	72.66	71.8	70.38	71.46	73.67	77.28	71.21	65.21	92.16
211918_x_at						Yes, but >10% FDR	0.027235	86.548	93.95	40.046	5.1	93.94	90.2	97.34	90.32	97.88	93.83	90.38	85.63	87.43	81.35	90.13	86.34	88.4
211924_s_at	yes	580.056	961.95	7632.77	-1.36907	Yes, and meet 10%FDR	2.2683e-05	582.858	934.943	6704.37	-1.5	604.34	594.28	625.99	616.95	548.75	558.73	546.09	568.1	586.51	560.28	709.18	787.43	917.14
211929_at						Yes, but >10% FDR	0.036503	467.939	661.219	19904.4	6.3	657.47	667.67	663.52	603.41	681.23	688.35	581.24	671.39	646.27	706.72	614.39	747.54	464.97
211939_x_at						Yes, but >10% FDR	0.024949	12767.2	14525.7	1364.37	0.6	14037.5	14312.6	15329.3	14442.2	14432.2	13921.2	14522.5	14115.6	14096	13317.2	13998.6	12774.7	13161.2
211940_x_at						Yes, but >10% FDR	0.03487	10821.3	12382	3944.37	0.6	12484.8	12695.2	11869.7	12144.4	12279.8	12563.9	12598.8	11722.6	12633.8	11569.2	11577.2	11795.9	10772
211943_x_at						Yes, but >10% FDR	0.018222	22414.7	23847.4	6.484	6.3	23234.8	23673.7	24508.6	23690.2	23739.5	21935.8	23186.5	22693.6	22134.4	22211.2	23202.6	21890.2	22334.7
211946_s_at						Yes, but >10% FDR	0.018312	1561.27	1879.88	19184.4	6.3	1879.47	1840.65	1892.4	1924.14	1856.02	1975.5	1893.71	1850.89	1889.78	1867.64	1709.08	1918.82	1566.14
211954_s_at	Yes	1098.33	1473.92	5715.73	3.35914	Yes, but >10% FDR	0.0029367	1097.32	1465.49	5924.37	3.6	1500.49	1435.16	1384.36	1507.56	1499.22	1398.83	1620.25	1362.46	1561.81	1467.35	1421.3	1148.07	1099.78
211962_s_at	yes	774.841	1070.45	10328.6	-17.083	Yes, and meet 10%FDR	0.00054624	771.388	1061.21	10784.4	-6	836.69	774.43	837.53	742.89	793.45	762.71	771.76	696.99	760.6	776.58	769.62	882.83	1070.45
211971_s_at						Yes, but >10% FDR	0.028911	2891.45	3830.96	19184.4	6.3	3891.5	3494.81	4199.49	3850.95	4036.81	3970.21	3776.93	3620.57	3885.81	3638.18	3625.59	4144.55	2844.58
211992_at	Yes	598.85	685.902	581.14	350.695	Yes, but >10% FDR	0.0040296	590.51	685.287	704.367	6.3	703.9	656.66	668.6	694.1	645.38	686.44	721.57	671.39	725.08	583.26	599.24	615.66	581.65
212005_at						Yes, but >10% FDR	0.042972	240.486	276.974	524.367	0.9	260.56	305.71	273.42	255.82	286.03	274.95	277.43	272.29	252.65	256.18	252.65	239.02	239.19
212007_at						Yes, but >10% FDR	0.019956	1577.97	2023.42	1184.37	6	2001.69	2126.11	2191.95	2151.31	1806.52	1971.39	2185.88	1789.08	2099.75	1835.55	1558.56	1768.12	1430.2
212029_s_at						Yes, but >10% FDR	0.038229	68.977	77.884	33.937	6	76.89	73.41	70.57	84.86	79.18	81.35	71.46	68.26	70.77	71.61	66.86	69.79	67.6
212033_at						Yes, but >10% FDR	0.02654	845.648	979.395	4244.37	-6	916.79	867.67	831.17	850.4	849.22	867.67	840.44	836.37	828.29	778.2	869.47	1026.13	924.16
212037_at						Yes, but >10% FDR	0.044301	431.14	565.929	12704.4	-6	481	408.16	429.64	402.82	464.65	417.61	465.62	412.43	426.68	393.99	494.22	456.03	570.47
212041_at	Yes	1993.38	2224.04	8740.33	12.437	Yes, but >10% FDR	0.014348	1989.3	2227.23	7784.37	6.3	2209.07	2278.71	2300.93	2137.93	2204.14	2292.97	2286.62	2124.64	2211.79	2185.88	2231.81	2029.63	1993.38
212043_at						Yes, but >10% FDR	0.046123	4934.01	5719.87	11924.4	2.1	5662.06	5792.62	5804.68	5853.16	5796.64	5669.48	5572.08	5772.58	5202.54	5732.7	5638.13	5419.71	5004.46
212056_at						Yes, but >10% FDR	0.015928	583.242	874.298	8804.37	1.2	884.67	974.83	824.86	927.37	839.86	883.45	858.69	803.41	897.02	831.17	743.92	806.76	572.05
212057_at	Yes	-83098	800.15	48255	11.8181	Yes, but >10% FDR	0.011052	499.547	799.669	17144.4	6.3	844.66	839.86	815.19	879.17	792.9	770.15	797.31	789.06	743.92	863.47	662.14	803.97	496.28
212062_at						Yes, but >10% FDR	0.0062887	791.74	1076.77	13484.4	6.3	1115.56	1139.35	1087.65	1072.68	1028.27	1076.4	1171.39	997.38	1115.13	1097.5	998.76	1041.18	776.58
212075_s_at						Yes, but >10% FDR	0.0039032	896.439	1307.49	12344.4	6.3	1297.93	1251.12	1419.34	1285.4	1393.02	1293.44	1415.41	1298.83	1172.2	1283.62	1280.95	1222.82	874.31
212077_at	Yes	-119792	2143.53	43109.7	15.1963	Yes, but >10% FDR	0.010318	1669.92	2150.99	17804.4	6.3	2174.8	2112.89	2181.34	2139.41	2095.39	2117.29	2201.09	1967.3	2321.75	2022.61	2196.51	2191.95	1652
212093_s_at						Yes, but >10% FDR	0.046656	2715.5	3026.48	65.796	6.3	2991.99	2876.3	3329.29	3080.61	3080.61	2918.48	3042.41	2610.3	2932.67	2745.78	2774.48	2503.97	2782.18
212099_at	Yes	99.1373	170.236	9530.28	0.863313	Yes, but >10% FDR	0.001651	113.74	170.407	5084.37	1.2	160.58	164.73	174.13	179.4	163.03	182.4	172.33	157.59	168.08	170.19	138.91	139.97	116.81
212105_s_at	yes	211.273	296.425	1199.54	12.5284	Yes, and meet 10%FDR	0.00070266	217.029	295.344	1304.37	6.3	283.39	280.72	322.69	271.54	302.54	296.52	316.93	278.98	314.52	272.86	199.47	221.01	213.34
212107_s_at	Yes	1263.71	2019.96	25430.1	0.636154	Yes, but >10% FDR	0.0060787	1610.81	2024.25	3944.37	0.9	1943.65	1944.25	1904.24	2179.83	2053.69	2038.09	2093.93	2010.03	1940.21	1884.54	1856.02	1782.89	1610.17
212114_at						Yes, but >10% FDR	0.005623	911.43	1482.7	5684.37	0.6	1466.11	1574.85	1475.51	1571.58	1473.47	1443.14	1437.16	1262.44	1455.2	1390.13	1188.56	1295.24	918.41
212118_at						Yes, but >10% FDR	0.025255	427.853	477.596	0.89	6.3	461.05	492.51	477.38	430.24	415.3	432.93	429.35	399.76	425.2	419.35	429.05	460.8	449.76
212121_at	Yes	1817.8	2034.72	43.8263	14.7944	Yes, but >10% FDR	0.0064744	1817.8	2037.9	47.254	6.3	2015.45	2093.93	1953.71	2107.04	1965.94	2072.28	1972.76	1720.96	1787.84	1900.28	1858.6	1898.97	1740.15
212126_at						Yes, but >10% FDR	0.0080328	773.73	878.862	65.796	6.3	875.59	870.08	939.66	834.06	841.02	871.89	874.92	746.5	788.52	812.94	799.53	763.24	731.64
212130_x_at						Yes, but >10% FDR	0.02756	8674.86	10469.3	18284.4	-6	8896.36	9242.07	8701.21	8551.73	8939.63	9390.59	9083.29	8141.05	8231.84	8358.34	8551.73	8393.17	10543
212141_at	Yes	1036.02	2099.28	335952	0.298681	Yes, but >10% FDR	0.01131	1744.17	2085.53	1004.37	0.6	2081.71	2130.53	1929.48	2146.84	2115.82	2118.75	2019.8	2017.01	1883.24	1916.16	1866.35	1936.18	1701.98
212150_at	Yes	-8565.46	747.323	1.40576e+06	1.00351	Yes, but >10% FDR	0.011979	564.406	748.268	11024.4	6.3	729.11	785.79	795.1	696.51	690.74	803.97	729.62	724.58	773.9	736.73	720.57	684.54	555.25
212181_s_at						Yes, but >10% FDR	0.0025044	344	409.812	9584.37	6.3	418.19	429.35	410.43	412.14	401.43	423.44	403.66	392.08	398.38	399.21	413.57	372.48	344.65
212184_s_at						Yes, but >10% FDR	0.030613	364.924	487.137	6944.37	0.9	480.59	476.72	466.59	522.76	485.05	477.05	525.67	459.53	481.04	443.56	431.44	463.36	361.04
212194_s_at						Yes, but >10% FDR	0.021583	543.857	754.02	884.367	0.3	702.98	764.3	799.53	763.24	645.83	709.67	661.68	669.99	680.29	688.35	640.92	602.58	546.85
212209_at						Yes, but >10% FDR	0.03181	428.138	465.606	24.373	4.8	454.14	447.27	503.2	453.2	472.77	463.04	430.54	436.55	409.86	423.73	417.61	447.27	429.35
212227_x_at						Yes, but >10% FDR	0.028134	8679.4	10470.5	15164.4	-6	8860.81	8976.89	7696.57	9077	8653.09	9390.59	8804.35	8605.24	8346.76	8457.41	8689.15	8792.15	10543
212228_s_at						Yes, but >10% FDR	0.027059	2280.11	2768.8	291.836	0.6	2746.41	2738.18	2846.55	2892.3	2524.88	2844.58	2608.49	2450.74	2707.98	2433.81	2160.28	2528.38	2248.89
212236_x_at						Yes, but >10% FDR	0.028864	84.169	97.064	24.373	6.3	92.14	97.55	90.82	105.49	92.48	103.9	77.39	82.6	88.28	85.57	81.91	90.82	81.01
212240_s_at	yes	-711.491	171.771	74568.1	2.94055	Yes, and meet 10%FDR	0.00052576	118.745	171.222	15464.4	6.3	172.76	167.38	166.92	174.73	184.69	158.02	179.64	173.53	166.23	172.33	173.28	169.25	114.96
212241_at	Yes	182.15	205.962	-17513.9	1	No		192.604	216.894	9.029	6.3	198.65	198.91	212.6	227.07	245.91	190.68	185.08	189.89	208.37	182.15	208.51	187.4	190.41
212248_at	Yes	1297.76	1462.26	403.615	2.43649	Yes, but >10% FDR	0.011839	1304.02	1467.38	344.367	2.1	1436.49	1495.07	1547.8	1455.2	1465.32	1359.63	1488.87	1437.16	1393.99	1304.25	1270.34	1379.57	1248.52
212266_s_at	Yes	-295297	4036.83	42734.4	15.4926	Yes, but >10% FDR	0.013712	2859.99	4017.92	18044.4	6.3	4079.31	4368.74	3983.99	4504.03	3722.36	4127.35	3975.72	3904.71	3872.37	4036.81	3678.75	4187.87	2795.71
212268_at						Yes, but >10% FDR	0.036989	1679.33	2406.47	4544.37	0.6	2396.05	2288.2	2565.46	2516.15	2264.54	2326.59	2350.9	2339.53	2029.63	2472.92	1909.53	2129.06	1748.62
212273_x_at	yes	7113.35	8390.26	84.2611	0.474022	Yes, and meet 10%FDR	0.00090528	7333.32	8236.54	77.64	6.3	8277.62	8510.33	8300.6	8135.41	8135.41	7858.29	8375.73	7236.12	7383.04	7569.59	7574.84	7261.24	6975.11
212300_at	Yes	-280.616	190.146	54011.2	3.22854	Yes, but >10% FDR	0.0019882	132.557	191.072	15404.4	6.3	196.22	190.28	181.52	199.19	198.91	204.51	191.21	190.81	177.54	175.95	185.08	188.45	128.8
212305_s_at						Yes, but >10% FDR	0.037767	324.171	450.109	10964.4	6.3	457.09	522.76	422.85	451.94	469.51	413.29	423.73	446.65	406.47	474.08	433.53	405.91	316.93
212331_at						Yes, but >10% FDR	0.025593	185.42	222.375	15584.4	6.3	222.52	216.32	240.68	219.18	231.04	215.57	233.94	214.67	228.97	211.13	222.71	221.17	183.04
212334_at						Yes, but >10% FDR	0.026943	1851.61	2154.21	9224.37	1.5	2146.51	2297.74	2190.43	2190.43	2078.03	2089.58	2170.78	2078.03	2107.04	2164.77	2036.67	2059.39	1834.28
212363_x_at						Yes, but >10% FDR	0.0067683	18273.2	21504.2	12704.4	6.3	21976.4	21829.6	21693.9	20998.5	20954.9	20637.8	22103.7	20481	21844.8	21693.9	22427.8	20911.4	18066.1
212370_x_at						Yes, but >10% FDR	0.04152	547.414	635.393	3.344	6.3	614.2	680.76	563.78	676.99	560.67	562.61	594.69	536.71	528.22	568.89	525.67	546.09	509.17
212372_at						Yes, but >10% FDR	0.024414	1716.63	1854.24	40.046	6.3	1883.82	1861.18	1768.12	1861.18	1854.74	1900.28	1782.89	1685.55	1849.6	1690.23	1725.74	1671.58	1677.39
212373_at						Yes, but >10% FDR	0.042718	101.543	130.89	13904.4	6.3	134.14	138.62	139.68	125.19	125.28	116.24	123.81	137.47	139.01	129.79	129.07	127.65	100.99
212377_s_at						Yes, but >10% FDR	0.046459	236.304	345.252	884.367	0.3	323.46	359.79	311.05	382.95	310.19	307.41	318.25	308.05	290.62	269.1	297.55	295.91	237.7
212383_at	Yes	299.763	351.616	20.2602	0.711213	Yes, but >10% FDR	0.0022611	297.453	351.445	24.373	0.6	349.63	351.65	347.77	350.68	326.06	339.44	319.35	305.28	297.14	317.59	303.17	316.93	277.24
212396_s_at						Yes, but >10% FDR	0.010193	299.528	449.747	2444.37	0.6	426.15	468.21	495.59	399.21	424.61	451.01	449.44	458.57	376.89	381.09	397	356.07	298.38
212409_s_at						Yes, but >10% FDR	0.018999	298.244	380.2	1064.37	0.9	336.57	354.83	426.97	388.56	386.68	364.81	390.45	371.19	348.01	341.8	324.03	300.87	306.77
212411_at						Yes, but >10% FDR	0.017639	1721.41	1912.7	28.76	6.3	1871.09	1844.48	1829.2	2091.03	1867.64	1972.76	1744.99	1720.96	1765.67	1703.16	1668.11	1735.34	1755.91
212413_at						Yes, but >10% FDR	0.019726	74.703	93.095	10184.4	6.3	96.15	95.54	95.34	99.18	89.88	94.09	89.7	84.33	96.2	88.16	94.29	84.45	74.59
212418_at						Yes, but >10% FDR	0.0040976	238.726	336.802	9464.37	6	341.22	341.56	364.81	352.87	336.39	324.71	346.57	318.91	319.13	300.66	338.5	279.75	241.19
212420_at						Yes, but >10% FDR	0.032439	240.291	584.212	18764.4	6.3	561.36	656.66	583.26	592.22	482.04	638.26	553.33	690.74	565.74	596.76	404.5	595.93	247.28
212428_at						Yes, but >10% FDR	0.03757	400.14	459.695	644.367	6.3	471.94	496.62	443.26	456.03	442.34	446.65	481.37	431.73	494.56	381.62	442.34	394.26	376.11
212434_at						Yes, and meet 10%FDR	0.00050964	328.504	525.015	13904.4	-6	322.07	334.76	305.28	315.39	352.14	286.42	327.65	317.37	347.29	342.75	383.74	350.92	538.57
212441_at	Yes	-899667	786.06	59620.1	11.8951	Yes, but >10% FDR	0.012919	537.266	788.867	18044.4	6.3	796.64	803.97	821.43	813.5	797.31	750.13	877.34	781.44	777.12	696.51	707.21	810.12	531.16
212444_at	Yes	1495.46	1948.3	10000.6	-673.909	Yes, but >10% FDR	0.0080428	1485.94	1946.63	10004.4	-6	1570.85	1508.61	1326.12	1670.43	1580.32	1454.19	1457.22	1545.65	1433.18	1466.34	1437.16	1717.39	1948.3
212447_at						Yes, but >10% FDR	0.04568	389.884	508.734	12704.4	6.3	523.28	540.82	517.71	465.62	536.34	558.34	468.86	494.22	503.2	477.05	478.04	487.75	383.21
212460_at						Yes, but >10% FDR	0.03181	954.254	1254.61	3344.37	0.9	1181.72	1125.23	1362.46	1174.64	1366.24	1201.82	1280.06	1284.51	1195.17	1129.13	1150.46	1026.13	975.5
212462_at	Yes	129.008	183.091	15830.6	1.23111	Yes, but >10% FDR	0.017036	145.438	182.047	8984.37	1.8	179.4	174.73	198.23	186.24	185.72	166	191.34	179.15	186.63	181.77	174.73	164.05	145.82
212463_at						Yes, but >10% FDR	0.018763	493.825	577.173	464.367	4.5	583.98	581.65	548.37	536.34	576.83	593.87	604.25	586.91	552.95	489.44	501.46	546.09	436.25
212464_s_at						Yes, but >10% FDR	0.010959	5027.55	6757.07	13964.4	6.3	6824.73	7251.18	7246.16	6989.63	6571.47	7101.95	6571.47	6553.27	6667.82	6603.43	6042.79	6585.15	4959.57
212471_at	Yes	21.7691	94.4273	1.95376e+06	0.276992	Yes, but >10% FDR	0.0097897	76.21	93.094	1664.37	0.6	93.82	95.67	86.76	99.59	94.62	89.14	88.89	93.18	84.86	85.39	86.1	81.01	76.48
212472_at	Yes	120.34	167.256	-52058.2	1	No		126.493	138.722	47.254	-6	132.86	147.14	120.34	124.41	127.65	121.1	128.27	176.31	125.11	134.83	123.98	151.59	120.59
212475_at						Yes, but >10% FDR	0.029552	132.445	201.248	19004.4	-6	132.21	141.34	130.15	124.93	150.44	106.3	135.77	134.74	122.11	167.38	129.07	125.11	200.44
212491_s_at						Yes, but >10% FDR	0.04968	199.767	280.548	1124.37	0.3	279.58	262.47	301.71	265.03	253.7	268.91	252.48	225.82	254.41	274.18	240.02	219.49	208.51
212493_s_at						Yes, but >10% FDR	0.042088	224.796	351.609	5444.37	0.9	355.85	349.71	312.78	342.51	348.01	385.88	383.48	313.65	360.04	301.5	278.4	323.81	223.79
212498_at						Yes, but >10% FDR	0.0046952	1582.49	2012.26	14204.4	6.3	2094.42	1979.61	2111.42	2060.82	2005.85	2038.09	2062.24	1928.15	2028.22	1838.1	2036.67	1971.39	1569.4
212507_at						Yes, but >10% FDR	0.034203	467.228	547.251	1664.37	6.3	540.44	552.56	556.79	572.45	522.4	488.43	541.94	528.95	587.32	547.23	438.06	489.78	479.37
212510_at						Yes, but >10% FDR	0.017475	1235.39	1491.03	524.367	1.5	1538.64	1378.61	1600.16	1571.58	1350.24	1503.39	1558.56	1402.71	1433.18	1236.46	1340.91	1222.82	1210.18
212531_at	Yes	2777.98	3953.48	4022.37	0.282623	Yes, but >10% FDR	0.0045646	3394.13	3858.07	108.105	4.5	3897.8	4020.06	3800.57	3888.51	3671.11	3856.3	3848.29	3560.84	3352.45	3352.45	3575.68	3485.14	3038.2
212532_s_at						Yes, but >10% FDR	0.029764	1214.61	1351.17	108.105	6.3	1343.39	1224.52	1362.46	1363.41	1320.62	1365.3	1439.15	1243.34	1141.73	1248.52	1213.53	1247.65	1216.9
212538_at						Yes, but >10% FDR	0.042238	191.759	280.646	11624.4	6	289.46	269.1	301.5	321.57	286.03	237.21	265.03	264.84	311.48	270.22	279.75	255.11	189.89
212544_at						Yes, but >10% FDR	0.0043682	1311.03	1699.91	12224.4	6.3	1770.71	1696.09	1776.72	1599.05	1619.13	1717.39	1795.29	1594.62	1689.05	1712.63	1660.04	1614.64	1285.4
212546_s_at						Yes, but >10% FDR	0.020374	120.098	160.47	3344.37	0.6	158.47	151.06	179.77	159.45	159.45	159.45	146.52	152.54	164.28	141.93	140.56	140.75	119.35
212548_s_at						Yes, but >10% FDR	0.047484	287.048	327.515	177.621	6.3	330.77	331.76	344.65	299.62	329.01	333.61	316.49	324.71	268.73	300.04	278.01	322.02	259.39
212553_at	Yes	201.619	155904	2.62103e+07	-1.06735	Yes, but >10% FDR	0.0023487	204.916	309.668	12524.4	-6	201.01	212.31	197.27	169.95	230.4	203.94	187.27	197.54	212.75	198.91	231.2	225.97	316.27
212556_at	Yes	-12538.6	229.978	45505.9	12.2289	Yes, but >10% FDR	0.0083841	156.024	230.295	18764.4	6.3	240.68	251.78	221.94	214.08	235.24	217.97	237.21	233.13	225.66	231.2	204.08	246.77	152.22
212557_at						Yes, and meet 10%FDR	0.0014014	164.907	213.242	7.651	0.9	193.91	218.73	223.63	199.47	188.45	179.52	182.15	165.77	178.28	169.72	162.35	155.74	157.59
212562_s_at	Yes	69.5252	252.454	75939.9	-2.58987	Yes, but >10% FDR	0.0082318	69.493	83.68	14744.4	-6	71.34	65.16	69.31	73.21	71.11	68.07	68.4	72.45	64.71	72.4	68.59	70.57	84.68
212569_at						Yes, but >10% FDR	0.049619	90.613	115.34	16004.4	6.3	119.13	110.35	118.36	112.21	117.62	110.2	114.4	115.36	128	114.64	102.61	114.4	90.64
212583_at	Yes	90.8709	103.18	9175.27	-15.249	Yes, but >10% FDR	0.0087102	90.837	102.979	8024.37	-6	92.84	92.41	92.03	88.34	88.95	90.2	94.03	86.82	90.45	96.14	87.37	100.57	103.18
212593_s_at						Yes, but >10% FDR	0.002722	500.811	728.121	7784.37	1.8	768.55	751.69	721.07	732.66	784.7	653.93	780.36	684.54	719.57	695.54	688.35	596.34	504.25
212595_s_at						Yes, but >10% FDR	0.034515	3219.41	3769.96	1784.37	0.6	3600.27	3575.68	4011.71	4045.21	3774.32	3645.75	3730.1	3543.6	3766.48	3524	3439.54	3324.68	3272.1
212625_at	Yes	250.284	335.62	8520.02	-2.07316	Yes, but >10% FDR	0.01133	250.802	332.74	8144.37	-2.1	255.68	261.38	227.23	259.21	284.25	246.94	232.32	267.61	226.44	239.69	265.21	298.79	330.16
212648_at						Yes, but >10% FDR	0.02021	813.067	938.451	28.76	5.4	916.22	946.86	1028.98	921.6	868.87	948.17	832.32	820.3	840.44	803.97	849.22	859.29	732.15
212651_at						Yes, but >10% FDR	0.0064872	443.06	652.112	10424.4	6.3	659.55	673.72	716.09	679.34	622.96	623.83	675.59	636.05	564.18	625.99	653.03	562.22	441.11
212665_at	yes	1043.97	4004.56	3555.46	-0.5672	Yes, and meet 10%FDR	2.2798e-08	1041.45	3663.28	2144.37	-0.6	1006.8	994.62	1133.84	1246.79	1071.19	1010.6	1277.4	1434.17	1781.65	1929.48	2608.49	2868.34	3350.13
212710_at	Yes	122.794	150.928	132.562	-12.4078	Yes, but >10% FDR	0.0069131	122.656	151.884	150.526	-5.4	123.31	137.66	114.72	110.51	134.18	114.33	124.85	131.05	157.26	147.24	139.3	154.99	155.85
212721_at	Yes	-26.3531	525.667	32189.7	12.5498	Yes, but >10% FDR	0.018431	374.165	527.606	18044.4	6.3	564.61	577.23	525.3	571.65	482.04	510.23	526.03	487.07	499.38	514.85	499.73	549.89	364.3
212724_at						Yes, but >10% FDR	0.018195	522.229	712.51	12524.4	4.5	698.34	755.35	693.14	749.09	767.49	611.84	741.86	711.15	712.63	725.08	702.33	663.06	525.3
212737_at	Yes	350.561	912.027	63899	0.354629	Yes, but >10% FDR	0.018276	667.43	917.203	884.367	0.6	860.48	932.53	841.61	1026.13	871.28	906.4	906.4	797.31	790.16	821.43	747.02	784.7	638.7
212739_s_at						Yes, but >10% FDR	0.021539	681.394	809.08	150.526	6.3	782.53	752.74	811.25	805.64	749.09	891.44	885.9	785.25	664.9	748.57	656.2	672.78	688.35
212744_at						Yes, but >10% FDR	0.02202	264.651	345.875	65.796	6.3	313.31	323.81	379.77	377.94	314.3	326.06	353.36	246.42	304.65	229.44	302.75	264.29	240.35
212760_at						Yes, but >10% FDR	0.033666	120.25	160.421	8324.37	1.5	166.55	153.28	168.66	152.96	146.32	173.16	175.1	150.33	157.15	164.39	143.81	145.51	118.52
212767_at	Yes	117.996	413.2	240409	0.394866	Yes, but >10% FDR	0.0031353	312.215	411.29	3464.37	0.6	410.5	397.28	404.22	424.02	430.54	401.99	408.45	387.49	412.14	349.71	376.89	357.05	318.91
212788_x_at						Yes, but >10% FDR	0.042819	31832.9	33225.6	13904.4	-6	31729.9	31433.2	32138.2	32115.9	32474.1	31542.3	32205.1	31281	32004.8	31717.7	31695.7	32004.8	33271.5
212790_x_at						Yes, but >10% FDR	0.011844	26637.1	28584.4	16004.4	6.3	28687	28884.3	28844.3	28546	28388.1	28447.2	28964.5	28192	27726.9	28665	29206.5	28526.2	26597.4
212793_at						Yes, but >10% FDR	0.020149	65.857	84.353	8984.37	-1.8	64.44	60.13	66.39	57.32	67.88	65.84	65.3	74.7	67.23	66.21	69.12	75.43	83.52
212803_at	Yes	113.23	154.401	8465.8	-3.69912	Yes, but >10% FDR	0.0060246	113.707	156.911	8804.37	-3.3	118	114.88	114.33	118.11	108.31	129.25	111.51	106.82	94.81	116.4	114.4	139.97	154.02
212813_at						Yes, but >10% FDR	0.023694	75.197	96.496	5444.37	-1.5	77.59	85.33	77.23	75.01	77.17	66.44	69.6	68.69	80.28	75.27	83.06	89.88	94.48
212814_at	Yes	162.251	199.079	3633.12	1.59182	Yes, but >10% FDR	0.013918	163.045	199.131	3464.37	1.8	205.34	180.27	211.72	189.49	204.36	190.94	203.94	199.05	209.38	189.36	183.04	168.43	163.26
212829_at						Yes, but >10% FDR	0.022797	700.373	848.024	8744.37	2.4	861.54	870.68	865.87	823.71	844.53	900.76	853.95	783.61	791.26	882.22	829.44	763.77	705.74
212830_at						Yes, and meet 10%FDR	0.0013137	514.532	861.927	3884.37	0.6	864.27	882.83	873.1	876.13	826.57	842.19	836.37	864.07	700.38	818.59	654.39	706.23	543.45
212838_at	yes	1135.98	1796.53	10075.9	-15.2992	Yes, and meet 10%FDR	5.0172e-05	1132.14	1789.04	10124.4	-6	1164.55	1093.7	1077.15	1182.81	1112.82	1171.39	1024	1094.46	1258.95	1208.5	1107.43	1447.15	1796.53
212862_at	Yes	86.0429	317.011	76411.1	0.421302	Yes, but >10% FDR	0.015315	221.505	312.243	2864.37	0.9	310.86	321.35	294.88	345.85	319.79	285.43	333.14	268.17	322.69	272.1	269.29	250.21	223.17
212867_at	Yes	-44845.3	366.606	2.87885e+06	1.25075	Yes, but >10% FDR	0.014552	226.057	362.253	11804.4	6.3	377.04	440.5	395.08	347.29	339.44	351.16	371.96	348.74	327.42	351.65	371.7	326.51	217.07
212871_at						Yes, but >10% FDR	0.0050886	351.209	444.583	584.367	0.6	434.24	441.72	424.91	497.31	426.68	442.64	418.19	415.3	410.43	376.37	387.75	356.81	366.84
212888_at						Yes, but >10% FDR	0.011818	231.889	263.534	33.937	5.1	261.84	242.02	274.95	277.63	253.53	270.22	242.02	231.52	228.02	222.4	242.69	225.35	243.03
212899_at						Yes, but >10% FDR	0.018394	203.163	287.279	524.367	0.6	267.34	311.48	312.78	288.01	256.89	246.42	268.54	275.52	264.66	232.49	201.13	241.52	199.19
212905_at						Yes, but >10% FDR	0.026928	81.182	115.067	13484.4	6.3	111.13	125.28	114.17	100.71	119.35	101.34	117.78	112.91	122.45	115.52	120.18	110.58	81.06
212923_s_at						Yes, but >10% FDR	0.032934	106.68	138.989	13304.4	-3	106.25	110.74	104.4	126.15	107.56	103.54	100.85	95.54	103.68	103.04	108.68	116.16	137
212928_at	Yes	66.044	99.3391	9453.57	1.76244	Yes, but >10% FDR	0.0042962	68.225	100.065	8204.37	1.8	97.49	100.71	102.04	94.88	103.68	99.46	103.82	101.76	85.09	104.55	93.64	82.08	69.84
212932_at						Yes, but >10% FDR	0.041105	158.196	185.171	9.029	2.1	187.94	180.39	174.01	198.78	173.65	169.6	155.2	155.74	158.02	171.97	150.23	174.01	137.19
212933_x_at						Yes, but >10% FDR	0.0052517	4490.73	5641.87	13124.4	6.3	5718.15	5712.87	6005.21	5231.47	5333.99	5614.73	5716.83	5677.34	5572.08	5649.86	5832.91	5468.77	4448.18
212934_at						Yes, but >10% FDR	0.028613	366.277	437.685	6584.37	6.3	449.93	413.29	422.56	447.58	454.77	421.68	449.76	479.7	450.69	405.06	438.98	369.9	372.99
212955_s_at						Yes, but >10% FDR	0.017466	2352.13	2716.99	344.367	0.6	2632.71	2846.55	2772.55	2713.61	2603.07	2711.73	2624.81	2603.07	2537.16	2395.32	2588.68	2196.51	2460.95
212959_s_at	Yes	52.8206	325.74	262950	0.33272	Yes, but >10% FDR	0.0066827	231.904	324.694	1484.37	0.6	312.23	320.68	345.85	318.03	313.86	314.52	335.23	306.77	256.36	298.79	278.4	266.87	230.56
212964_at						Yes, but >10% FDR	0.015359	94.827	108.742	1604.37	-6	93.53	91.33	94.35	94.16	95.27	97.82	101.34	95.01	86.34	95.34	114.96	109.06	101.83
212967_x_at	yes	3861.65	4870.08	10549.3	13.6094	Yes, and meet 10%FDR	0.00027331	3912.09	4868.34	11084.4	6.3	5016.81	4904.87	4904.87	4649.95	5081.36	4864.24	4783.99	4767.44	4780.68	4881.13	4935.57	4541.65	3861.65
212969_x_at						Yes, but >10% FDR	0.029699	114.878	138.957	47.254	4.8	134.33	134.08	136.9	126.68	132.51	166.57	129.34	118.6	114.4	117.13	115.68	109.52	113.93
212973_at	Yes	126.683	9455.27	1.65868e+07	-0.801838	Yes, but >10% FDR	0.0030189	127.256	183.899	10364.4	-1.8	131.14	134.46	121.94	123.04	121.77	113.3	142.22	128.44	127.91	123.98	147.14	145.41	186.11
212974_at						Yes, but >10% FDR	0.016301	99.45	111.776	1964.37	-6	100.94	97.68	98.29	102.47	100.08	105.57	95.14	101.27	96.2	93.12	117.38	110.13	108.08
212982_at						Yes, but >10% FDR	0.035901	220.094	347.395	18044.4	6.3	377.97	363.3	318.25	382.95	315.61	348.25	387.22	308.26	342.27	341.32	297.14	358.79	215.87
213005_s_at	Yes	182.911	204.088	30.507	1.62523	Yes, but >10% FDR	0.0064464	182.586	204.549	28.76	1.5	199.87	208.8	204.79	206.07	199.19	199.74	192.67	181.4	182.28	190.28	195.77	176.44	172.45
213011_s_at						Yes, but >10% FDR	0.022032	8392.04	10820.9	4484.37	0.6	10770.4	10922.4	11609.4	10839.4	9871.13	10594.3	10952.7	10169.8	9898.54	10290.3	10043.7	9802.95	8266.15
213019_at						Yes, but >10% FDR	0.024019	203.915	354.049	18164.4	6.3	357.08	382.95	386.95	382.95	293.25	418.19	353.12	332.45	338.73	345.85	318.25	372.73	198.64
213022_s_at						Yes, but >10% FDR	0.048478	102.92	125.002	704.367	6.3	118.72	129.52	125.02	142.62	119.26	118.44	109.97	117.87	135.49	99.18	111.97	101.9	95.41
213025_at						Yes, but >10% FDR	0.036545	155.15	207.698	18044.4	6.3	211.31	196.72	215.42	182.53	210.69	206.93	190.15	203.38	194.55	208.8	213.19	211.57	154.34
213029_at						Yes, but >10% FDR	0.022844	426.898	587.945	40.046	0.6	559.76	637.38	488.09	632.97	526.76	534.11	503.55	494.22	415.87	519.51	401.99	431.14	417.03
213032_at	Yes	-979.543	124.843	119521	2.40631	Yes, but >10% FDR	0.011984	87.889	124.786	14924.4	6.3	126.24	126.85	132.15	137.28	118.6	110.58	124.85	124.93	132.79	115.76	122.62	122.45	86.52
213051_at						Yes, and meet 10%FDR	0.0011879	1532.74	2326.96	10784.4	2.7	2404	2519.64	2321.75	2248.89	2447.34	2297.74	2372.18	2066.54	2360.7	2320.15	2201.09	1998.91	1518.05
213057_at						Yes, but >10% FDR	0.0026772	120.529	182.441	11324.4	3.6	180.63	190.15	179.27	185.98	177.42	185.72	188.84	179.02	194.82	155.74	179.89	158.46	121.01
213076_at	yes	112.281	153.924	10861.4	-9.32896	Yes, and meet 10%FDR	0.0011525	111.973	151.565	11144.4	-6	104.36	102.54	120.34	116.81	113.3	116.97	108.16	108.53	119.93	114.48	109.67	125.45	153.92
213079_at						Yes, but >10% FDR	0.020941	377.269	458.723	7184.37	3.3	451.98	473.1	459.21	483.38	451.32	464.33	416.16	479.37	427.86	485.05	451.32	397.83	377.41
213086_s_at						Yes, but >10% FDR	0.020468	2089.5	2351.65	2.402	6.3	2281.34	2324.98	2385.37	2357.43	2056.54	2123.16	2248.89	2133.49	2176.81	2121.69	2107.04	1902.92	2042.33
213111_at						Yes, but >10% FDR	0.018431	222.258	319.77	12344.4	6.3	334.33	324.71	342.98	327.65	326.51	279.95	306.77	323.58	348.98	284.64	322.69	299.41	222.09
213136_at						Yes, but >10% FDR	0.029054	462.271	519.293	91.615	6.3	497.96	532.26	501.46	485.73	566.92	538.57	534.85	470.48	458.89	457.62	464.97	496.62	435.94
213137_s_at	Yes	182.233	208.623	90.3319	157.44	Yes, but >10% FDR	0.011499	182.232	210.294	55.76	6.3	210.77	202.81	210.55	226.13	202.25	199.19	209.24	169.84	175.34	196.99	189.49	184.31	177.42
213151_s_at	yes	3272.49	4590.71	39155	0.767398	Yes, and meet 10%FDR	0.0012532	3973.36	4567.74	7904.37	2.1	4527.68	4601.86	4617.83	4630.65	4529.07	4711.6	4692.04	4374.8	4500.91	4547.95	4485.33	4199.49	4008.93
213156_at	Yes	-29476.9	239.517	1.76076e+08	0.694544	Yes, but >10% FDR	0.014579	168.842	239.295	8804.37	1.5	255	234.59	261.92	218.73	250.04	221.78	234.1	237.7	231.04	242.69	210.99	215.27	166
213158_at						Yes, but >10% FDR	0.044567	198.324	246.812	8804.37	6.3	253.22	262.83	252.83	229.13	241.19	215.42	254.06	235.89	264.66	252.83	253	213.49	197.54
213166_x_at	Yes	1188.62	1449.15	46.6917	15.2247	Yes, but >10% FDR	0.0019925	1188.62	1440.46	55.76	6.3	1440.04	1507.56	1373.84	1533.91	1328.88	1510.7	1415.41	1159.27	1243.34	1140.93	1242.47	1245.92	1099.78
213184_at						Yes, but >10% FDR	0.046179	205.131	256.095	7784.37	-6	213.08	233.45	200.71	207.36	180.77	195.23	209.82	186.75	227.23	208.37	196.99	247.11	252.83
213195_at						Yes, but >10% FDR	0.028426	77.019	88.264	12464.4	6	88.74	89.33	89.51	89.57	91.08	82.65	89.76	88.77	86.04	84.33	87.06	85.87	76.9
213198_at						Yes, but >10% FDR	0.040244	539.188	704.206	1484.37	0.3	682.23	702.81	648.52	757.45	688.35	659.85	631.22	648.97	651.67	613.11	631.66	635.61	533.37
213231_at						Yes, but >10% FDR	0.034359	59.66	73.162	18164.4	6.3	73.18	68.74	73.36	78.41	68.12	74.91	72.45	71.21	71.51	76.8	77.82	74.85	59.22
213233_s_at	Yes	517.139	820.312	4553.09	1.21536	Yes, but >10% FDR	0.010734	521.284	811.615	4724.37	1.2	814.25	815.19	838.69	761.66	938.36	741.86	802.3	763.77	931.23	730.13	685.97	624.69	533.37
213253_at						Yes, but >10% FDR	0.021964	107.999	138.711	7244.37	1.8	139.41	150.54	140.26	129.16	127.12	137.47	141.73	142.72	150.23	128.98	133.53	119.84	108.46
213265_at						Yes, but >10% FDR	0.027516	97.917	124.877	18764.4	-6	95.28	98.84	97.68	94.68	96.94	112.05	95.74	106.6	99.59	92.28	92.6	97.75	123.73
213297_at	Yes	172.081	3070.2	43085.8	-11.0057	Yes, but >10% FDR	0.0045998	172.567	222.419	19004.4	-6	171.18	185.34	185.34	166.92	177.54	167.27	170.07	170.07	170.66	179.77	162.35	158.46	225.03
213298_at						Yes, but >10% FDR	0.029214	89.009	98.127	9.029	5.4	98	98.29	92.8	101.27	97.68	89.82	89.7	89.2	93.9	91.01	83.87	82.94	92.16
213300_at						Yes, but >10% FDR	0.037767	178.323	204.341	209.592	6.3	212.53	215.57	191.87	207.36	184.69	210.26	208.8	207.22	171.49	177.29	168.78	200.02	175.83
213307_at	Yes	118.986	174.481	19106	1.67019	Yes, but >10% FDR	0.013435	138.405	174.306	11384.4	3	170.35	169.72	181.52	173.4	174.01	169.84	164.28	176.93	178.16	192.14	164.51	161.57	136.62
213316_at	Yes	66.4729	201.977	346413	-0.751211	Yes, but >10% FDR	0.0016626	66.816	85.221	9644.37	-6	68.82	68.78	64.94	68.17	61.78	65.57	67.14	64.09	69.5	72.55	65.53	77.06	84.86
213318_s_at						Yes, but >10% FDR	0.032694	959.162	1099.97	6.484	0.6	1091.68	1146.48	1051.33	1008.5	1050.6	1036.86	1006.41	941.62	994.62	892.06	1028.98	997.38	922.88
213322_at						Yes, but >10% FDR	0.037876	443.078	616.422	4304.37	0.9	596.25	622.1	628.17	682.18	529.32	655.29	618.23	541.19	611.41	592.63	518.43	526.03	450.69
213326_at	Yes	108.08	134.825	-12926.3	1	No		130.872	160.498	2.834	6.3	146.59	170.19	137	203.8	125.98	139.2	129.88	137.57	108.08	139.39	124.5	163.82	110.58
213338_at	Yes	81.19	89.66	126.947	-16.9923	Yes, but >10% FDR	0.01623	81.551	90.364	150.526	-4.5	83.32	82.71	84.04	82.48	78.68	78.74	78.36	84.45	90.51	83.23	94.16	90.64	89.76
213376_at	Yes	-2915.43	423.541	126332	2.38363	Yes, but >10% FDR	0.0055167	326.155	422.088	14864.4	6.3	437.93	420.8	417.32	451.01	404.22	409.86	460.8	414.15	406.75	412.43	422.85	415.87	318.47
213386_at	Yes	109.14	155.673	-65451.1	1	No		118.514	131.466	524.367	-6	119.3	123.38	119.43	109.14	123.73	121.35	116.97	118.11	117.7	157.7	124.5	138.14	112.75
213387_at						Yes, but >10% FDR	0.02241	73.571	80.014	108.105	6.3	80.82	80.78	74.65	79.78	81.23	80.17	84.21	75.37	70.33	76.69	74.59	74.59	71.9
213388_at						Yes, but >10% FDR	0.047949	59.055	68.52	16004.4	6.3	67.99	64.13	70.18	67.23	73.11	70.62	69.41	71.26	69.17	65.8	67.37	68.07	58.93
213391_at						Yes, but >10% FDR	0.026243	231.103	304.786	2504.37	0.9	288.19	316.49	293.66	287.62	301.71	303.59	350.68	290.42	306.98	256.18	279.75	243.71	234.92
213396_s_at						Yes, but >10% FDR	0.038497	203.033	291.917	8324.37	1.2	291.29	338.97	311.05	286.22	263.2	269.66	292.44	323.36	285.23	285.43	256.53	261.92	200.3
213398_s_at						Yes, but >10% FDR	0.0031778	1264.9	1515.73	644.367	6.3	1478.24	1549.94	1458.23	1618	1424.26	1560.72	1458.23	1451.17	1558.56	1245.92	1241.61	1287.18	1332.57
213402_at	Yes	96.1767	354.303	38849	-9.62	Yes, but >10% FDR	0.013026	96.336	114.931	19004.4	-6	99.88	98.09	95.8	94.03	102.39	99.94	92.93	97.55	90.51	94.81	97.68	90.51	116
213405_at						Yes, but >10% FDR	0.033991	528.18	654.394	9644.37	6.3	657.77	674.18	737.76	644.04	663.52	656.66	660.77	582.86	656.2	625.99	665.83	583.67	519.51
213408_s_at						Yes, but >10% FDR	0.004448	516.478	579.643	3.344	6.3	571.21	584.88	569.28	610.56	522.4	524.94	551.8	503.55	492.17	500.42	494.9	524.57	529.32
213414_s_at	Yes	23866.2	27198.1	10299.2	0.409356	Yes, but >10% FDR	0.0053295	24899.4	27142	1964.37	0.6	26856.8	27099.9	27707.7	27194	27043.6	26875.4	26931.4	26377.1	26763.9	25798.5	26726.8	24988.9	25302.6
213418_at	Yes	69.2269	79.3086	15501.6	0.682574	Yes, but >10% FDR	0.012632	72.775	78.988	5444.37	1.5	78.67	77.87	81.91	80.06	78.36	77.82	80.84	79.12	76.69	78.9	77.06	74.49	73.31
213419_at						Yes, but >10% FDR	0.030955	66.422	90.288	18044.4	6.3	95.14	88.59	85.63	93.44	80.06	86.7	91.33	85.98	82.83	94.16	97.55	93.12	65.48
213421_x_at	Yes	1527.54	1865.22	10708.3	9.81386	Yes, but >10% FDR	0.009495	1542.81	1871.84	10904.4	6.3	1906.88	2011.42	1754.69	1817.83	1816.57	1854.74	1884.54	1878.02	1914.83	1811.54	1866.35	1751.04	1527.55
213434_at						Yes, but >10% FDR	0.047891	203.279	283.667	8984.37	1.5	277.22	321.35	267.06	289.62	269.29	305.71	279.36	259.57	263.75	303.8	249.52	256.89	199.33
213440_at						Yes, but >10% FDR	0.023095	416.102	517.901	2564.37	5.1	480.11	504.6	583.67	485.73	557.57	565.74	491.14	510.58	513.42	515.56	436.85	401.71	436.25
213446_s_at	Yes	-4772.39	1164.36	38815	10.0744	Yes, but >10% FDR	0.0112	780.305	1176.72	15824.4	6.3	1161.68	1237.32	1336.27	1166.52	1081.64	1114.36	1112.82	1221.98	1099.02	1204.32	1068.23	1168.14	752.21
213449_at						Yes, but >10% FDR	0.031266	101.717	115.101	704.367	-6	104.74	95.41	95.8	103.18	111.82	91.77	103.97	104.18	99.25	115.36	119.1	109.44	118.11
213462_at	Yes	531.8	785.485	7018.22	-0.447131	Yes, but >10% FDR	0.0034258	554.644	701.631	3944.37	-6	517.83	532.63	546.85	520.23	530.42	593.05	545.71	588.54	566.13	599.24	593.46	748.05	665.83
213472_at						Yes, but >10% FDR	0.043332	76.411	93.967	20384.4	6.3	93.82	94.09	94.48	96.87	99.53	95.08	87.55	96.67	92.22	94.48	85.45	99.11	77.06
213475_s_at	Yes	67.2875	73.6925	233.532	64.6326	Yes, but >10% FDR	0.015618	66.868	73.956	247.319	6.3	73.22	72	76.8	69.94	76.69	74.23	71.7	74.96	67.09	67.74	66.21	70.62	64.58
213476_x_at						Yes, but >10% FDR	0.042947	3581.35	3901.92	0.459	5.7	3818.47	3981.23	3712.05	3643.22	3492.39	3774.32	3678.75	3509.38	3396.89	3618.06	3580.64	3427.64	3580.64
213483_at						Yes, but >10% FDR	0.03011	515.639	572.165	91.615	6.3	588.72	531.16	546.47	607.19	560.28	605.93	578.03	521.67	515.56	515.56	486.4	539.32	523.48
213484_at						Yes, but >10% FDR	0.043255	192.916	220.406	91.615	-6	198.61	205.07	175.22	192.81	216.17	171.37	185.46	217.07	214.67	225.97	220.71	210.69	227.86
213488_at	Yes	65.7765	89.0118	834.781	-0.476894	Yes, but >10% FDR	0.0016831	65.795	86.691	464.367	-0.6	70.46	63.69	63.25	64.49	72.81	66.39	66.49	77.28	78.3	73.62	80.62	84.21	85.98
213491_x_at						Yes, but >10% FDR	0.0054191	7707.69	9015.37	2204.37	0.6	9022.64	9351.62	9001.81	9008.06	8641.1	9089.59	8755.66	8369.93	8939.63	8469.14	8457.41	8163.66	7717.94
213501_at	Yes	65.8542	97.2037	8798.55	0.867813	Yes, but >10% FDR	0.0024498	72.197	96.772	5084.37	1.2	95.63	91.9	99.04	95.08	95.54	100.01	100.64	104.26	88.34	94.68	86.1	82.2	73.36
213503_x_at	yes	-374476	33253.8	40891.7	15.7715	Yes, and meet 10%FDR	4.5654e-05	30410	33285.4	17324.4	6.3	33371.6	33087.5	33549.4	33110.5	33363.9	33363.9	33433.3	32632	33110.5	33271.5	33248.5	33502.9	30194.5
213506_at	yes	1248.11	1840.65	1734.04	-0.717273	Yes, and meet 10%FDR	0.00055	1233.63	1874.93	1964.37	-0.6	1226.69	1292.55	1404.65	1108.2	1152.06	1295.24	1327.04	1332.57	1431.19	1399.8	1694.92	1682.04	1773.03
213521_at						Yes, but >10% FDR	0.044728	93.296	118.924	6344.37	-0.9	92.53	92.93	88.34	87.31	103.54	86.4	97.01	102.47	94.16	92.6	109.52	101.62	118.11
213523_at						Yes, but >10% FDR	0.036819	187.028	234.599	6404.37	-1.5	184.03	189.49	192.54	197.68	209.82	170.9	179.27	182.53	164.62	185.85	210.4	211.42	232.81
213526_s_at						Yes, but >10% FDR	0.026145	103.599	142.838	5624.37	0.9	137.27	153.38	146.32	137.38	135.3	156.39	139.68	143.31	121.68	145.51	126.5	121.85	105.35
213528_at						Yes, but >10% FDR	0.033628	89.906	128.87	7784.37	2.7	128.6	131.05	148.98	113.77	121.85	134.46	143.91	120.09	120.51	123.47	125.98	102.68	92.09
213531_s_at	Yes	523.172	742.397	7586.22	1.80746	Yes, but >10% FDR	0.013002	534.41	740.591	7064.37	2.1	764.95	703.3	667.67	741.34	791.8	695.06	816.89	696.51	779.82	772.29	684.07	613.11	537.45
213538_at						Yes, but >10% FDR	0.020128	290.288	351.938	0.89	6.3	337.25	369.39	354.1	287.62	277.05	293.86	292.04	318.47	283.46	286.42	321.13	315.17	252.48
213548_s_at						Yes, but >10% FDR	0.040103	135.493	169.652	150.526	6.3	152.31	165.31	201.41	165.54	170.54	155.96	182.28	164.73	125.45	133.71	132.51	156.5	139.2
213551_x_at						Yes, but >10% FDR	0.034126	137.164	164.57	0.389	6.3	155.73	172.8	140.46	141.04	137	147.03	150.44	132.88	131.51	128.8	134.46	147.75	127.65
213552_at	Yes	98.5541	127.305	11494.7	8.88062	Yes, but >10% FDR	0.01064	99.598	128.733	11684.4	6.3	125.26	120.34	129.52	132.51	127.12	116	132.51	132.88	130.15	123.47	130.6	120.84	98.56
213563_s_at						Yes, but >10% FDR	0.021232	99.444	128.837	19184.4	-6	108.25	106.08	101.13	101.97	102.04	105.13	94.35	93.7	97.82	107.49	93.57	89.14	130.6
213611_at	yes	77.9957	87.818	15.1728	14.7787	Yes, and meet 10%FDR	0.0012304	78.204	87.523	17.504	6.3	84.62	88.03	88.16	89.88	88.4	86.04	75.9	76.59	81.74	82.2	75.27	75.64	78.63
213616_at						Yes, but >10% FDR	0.019132	243.486	321.949	2984.37	0.9	325.81	300.66	327.87	330.38	307.62	349.22	323.81	278.59	336.16	290.42	281.7	270.03	245.91
213617_s_at						Yes, but >10% FDR	0.025661	646.077	910.264	2984.37	0.6	860.55	915.87	972.8	1007.11	859.89	888.36	935.12	769.62	819.16	826	858.69	716.09	671.85
213618_at						Yes, but >10% FDR	0.020395	67.692	80.57	65.796	-6	70.55	67.7	68.45	62.16	77.17	65.25	65.66	83.87	71.31	81.86	82.65	85.92	78.96
213624_at	yes	146.376	205.211	188.024	0.777079	Yes, and meet 10%FDR	0.00023732	148.026	203.596	177.621	0.9	190.66	201.69	222.71	208.08	198.64	196.58	193.88	177.05	172.09	152.64	153.7	162.69	135.67
213637_at						Yes, but >10% FDR	0.046656	105.152	144.441	19184.4	6.3	144.35	146.02	130.78	134.46	146.52	143.91	157.91	128.18	139.68	155.74	139.01	155.31	103.9
213664_at	Yes	129.788	152.924	2240.68	0.954987	Yes, but >10% FDR	0.01616	130.434	153.582	1904.37	0.9	145.14	146.83	154.66	153.92	153.92	154.56	166	150.23	143.41	145.82	142.81	130.42	133.07
213667_at	Yes	73.0317	278.541	34506.1	-16.2435	Yes, but >10% FDR	0.0064718	73.141	91.138	18284.4	-6	74.58	68.21	70.67	75.69	79.12	75.64	72.76	72.81	76.21	69.89	70.96	69.84	92.22
213669_at	Yes	82.6194	97.7189	47.1708	3.88446	Yes, but >10% FDR	0.0063757	82.574	97.701	47.254	3.9	96.37	99.11	94.81	102.75	95.34	97.82	92.09	83.23	74.8	92.73	77.06	81.86	86.4
213687_s_at						Yes, but >10% FDR	0.028911	6073.68	6518.77	3.946	6.3	6408.04	6454.1	6704.9	6585.15	6204.07	6084.82	6268.91	6338.83	5967.87	6260.23	6076.4	5740.66	6026.06
[truncated: 1,026 more rows]
