# Supplementary material for: Transcriptional Profiling of the Dose Response: A More Powerful Approach for Characterizing Drug Activities
Source: PLoS Comput Biol. 2009 Sep 18;5(9):e1000512. doi: 10.1371/journal.pcbi.1000512 (PMC2735650; doi:10.1371/journal.pcbi.1000512)
Supplement: Table S5 — KEGG 04010 MAPK loci (0.05 MB XLS) [file pcbi.1000512.s006.xls]

## Sheet: Loci in KEGG hsa04010
Locus ID provided by KEGG	Gene name from Entrez	Kinase or Phosphatase?	KEGG MAPK hsa:04010 Pathway diagram subset (hand annotated, only for loci with response transcripts)	Name in KEGG hsa04010 Pathway Diagram (hand annotated, only for loci with response transcripts)	PD0329501 Response transcript EC50, nM (from best fit probeset, p<0.05)	PD0329501 4h dataset, best fit probeset	Dasa 4h Response transcript EC50, nM (from best fit probeset, p<0.05)	Dasa 4h dataset, best fit probeset	Kd, nM of kinase for Dasatinib (from AMBIT Karaman et al. 2008). Some kinases are not in AMBIT panel	Name of kinase in Bantscheff et al. 2007, and in Figure 5a	[dasatinib](nM) causing 50% binding reduction in cell lysate (from Cellzome, Bantscheff et al. 2007). Some kinases are not in Cellzome data.	Kd, nM of kinase for imatinb (from AMBIT Karaman et al. 2008). Some kinases are not in AMBIT panel	Ima 20h Response transcript EC50, nM (from best fit probeset, p<0.05)	Ima 20h dataset, best fit probeset
5159	PDGFRB	Kinase	Classical MAPK	PDGFR					0.63		#N/A	14	#N/A	#N/A
5156	PDGFRA	Kinase	Classical MAPK	PDGFR					0.47		#N/A	31	#N/A	#N/A
5894	RAF1	Kinase	Classical MAPK	Raf1					570		#N/A	1700	#N/A	#N/A
51776	AZK	Kinase	JNK & p38	MLTK					45	ZAK	372.25	2600	#N/A	#N/A
5602	MAPK10	Kinase	JNK & p38	JNK					Kd>10 uM		#N/A	3100	#N/A	#N/A
408	ARRB1												#N/A	#N/A
409	ARRB2												#N/A	#N/A
1386	ATF2												#N/A	#N/A
468	ATF4		Classical MAPK, p38	CREB			8924.37	200779_at					#N/A	#N/A
5599	MAPK8	Kinase	JNK & p38	JNK					Kd>10 uM	JNK1	>5000	5000	#N/A	#N/A
627	BDNF		Classical MAPK	BDNF	0.542	206382_s_at	177.621	206382_s_at					#N/A	#N/A
91	ACVR1B	Kinase	JNK & p38	TGFBR					330	ALK4	>5000	Kd>10 uM	3284.37	213198_at
773	CACNA1A												#N/A	#N/A
774	CACNA1B												#N/A	#N/A
775	CACNA1C												#N/A	#N/A
776	CACNA1D												209.592	210108_at
777	CACNA1E												#N/A	#N/A
778	CACNA1F												#N/A	#N/A
8913	CACNA1G		Classical MAPK	CACN	19724.4	211802_x_at							#N/A	#N/A
8912	CACNA1H												#N/A	#N/A
8911	CACNA1I		Classical MAPK	CACN	17144.4	221631_at							#N/A	#N/A
779	CACNA1S												#N/A	#N/A
781	CACNA2D1												#N/A	#N/A
9254	CACNA2D2												#N/A	#N/A
55799	CACNA2D3												#N/A	#N/A
93589	CACNA2D4												#N/A	#N/A
782	CACNB1												#N/A	#N/A
783	CACNB2												#N/A	#N/A
784	CACNB3												#N/A	#N/A
785	CACNB4												#N/A	#N/A
786	CACNG1												#N/A	#N/A
10369	CACNG2												#N/A	#N/A
10368	CACNG3												#N/A	#N/A
27092	CACNG4												#N/A	#N/A
27091	CACNG5												#N/A	#N/A
59285	CACNG6												#N/A	#N/A
59284	CACNG7												#N/A	#N/A
59283	CACNG8												#N/A	#N/A
11261	Calcium binding protein P22												2204.37	207993_s_at
836	CASP3												#N/A	#N/A
929	CD14												#N/A	#N/A
994	CDC25B	Phosphatase	p38	Cdc25B			291.836	201853_s_at					#N/A	#N/A
998	CDC42												#N/A	#N/A
207	AKT1	Kinase							Kd>10 uM		#N/A	Kd>10 uM	#N/A	#N/A
1398	CRK												#N/A	#N/A
1399	CRKL												247.319	212180_at
1616	DAXX												16244.4	201763_s_at
1649	DDIT3		JNK & p38	GADD153	2.036	209383_at	15164.4	209383_at					#N/A	#N/A
1843	DUSP1	Phosphatase	all 3	MKP	2144.37	201041_s_at	14024.4	201041_s_at					1184.37	201041_s_at
11221	DUSP10	Phosphatase											#N/A	#N/A
11072	DUSP14	Phosphatase	all 3	MKP	247.319	203367_at							#N/A	#N/A
80824	DUSP16	Phosphatase											#N/A	#N/A
1844	DUSP2	Phosphatase											#N/A	#N/A
1845	DUSP3	Phosphatase											#N/A	#N/A
1846	DUSP4	Phosphatase	all 3	MKP	0.542	204015_s_at							11264.4	204015_s_at
1847	DUSP5	Phosphatase	all 3	MKP	0.89	209457_at							#N/A	#N/A
1848	DUSP6	Phosphatase	all 3	MKP	0.459	208892_s_at	24.373	208891_at					12824.4	208892_s_at
1849	DUSP7	Phosphatase	all 3	MKP	0.17	213848_at							#N/A	#N/A
1850	DUSP8	Phosphatase											#N/A	#N/A
1852	DUSP9	Phosphatase											#N/A	#N/A
51295	ECSIT												#N/A	#N/A
1950	EGF												#N/A	#N/A
208	AKT2	Kinase							Kd>10 uM		#N/A	Kd>10 uM	#N/A	#N/A
2002	ELK1												#N/A	#N/A
2005	ELK4		Classical MAPK, p38	Sap1A			7.651	214831_at					#N/A	#N/A
2122	EVI1												#N/A	#N/A
355	FAS												#N/A	#N/A
356	FASLG												#N/A	#N/A
2246	FGF1												#N/A	#N/A
2255	FGF10												#N/A	#N/A
2256	FGF11												#N/A	#N/A
2257	FGF12												13124.4	207501_s_at
2258	FGF13												#N/A	#N/A
2259	FGF14												#N/A	#N/A
8823	FGF16												#N/A	#N/A
8822	FGF17												#N/A	#N/A
8817	FGF18												#N/A	#N/A
9965	FGF19												#N/A	#N/A
2247	FGF2												#N/A	#N/A
26281	FGF20												#N/A	#N/A
26291	FGF21												#N/A	#N/A
27006	FGF22												#N/A	#N/A
8074	FGF23												#N/A	#N/A
2248	FGF3												#N/A	#N/A
2249	FGF4												#N/A	#N/A
2250	FGF5		Classical MAPK	FGF	14.834	210311_at							#N/A	#N/A
2251	FGF6												#N/A	#N/A
2252	FGF7												#N/A	#N/A
2253	FGF8												#N/A	#N/A
2254	FGF9												#N/A	#N/A
10000	AKT3	Kinase	JNK & p38	AKT			5324.37	212609_s_at	Kd>10 uM		#N/A	Kd>10 uM	#N/A	#N/A
673	BRAF	Kinase	Classical MAPK	RafB					500	BRAF	>5000	Kd>10 uM	#N/A	#N/A
1956	EGFR	Kinase	Classical MAPK	EGFR					120		#N/A	Kd>10 uM	#N/A	#N/A
2260	FGFR1	Kinase	Classical MAPK	FGFR					3700	FGFR1	>5000	Kd>10 uM	#N/A	#N/A
2316	FLNA												#N/A	#N/A
653852	FLNA												#N/A	#N/A
2317	FLNB												#N/A	#N/A
2318	FLNC		JNK & p38	FLNA			8384.37	207876_s_at					#N/A	#N/A
2353	FOS		Classical MAPK	c-FOS	0.542	209189_at							#N/A	#N/A
1647	GADD45A		?	GADD45	3.946	203725_at	11684.4	203725_at					17264.4	203725_at
4616	GADD45B		?	GADD45	3.344	207574_s_at	464.367	209305_s_at					944.367	209305_s_at
10912	GADD45G												#N/A	#N/A
2768	GNA12												#N/A	#N/A
55970	GNG12		Classical MAPK	G12			108.105	212294_at					#N/A	#N/A
2885	GRB2												#N/A	#N/A
3265	HRAS												9704.37	212983_at
3303	HSPA1A		JNK & p38	HSP72			3944.37	200799_at					247.319	200799_at
3304	HSPA1B		JNK & p38	HSP72			3584.37	202581_at					344.367	202581_at
3305	HSPA1L												#N/A	#N/A
3306	HSPA2		JNK & p38	HSP72			3344.37	211538_s_at					#N/A	#N/A
3312	HSPA8		JNK & p38	HSP72			108.105	210338_s_at					#N/A	#N/A
3315	HSPB1												3404.37	201841_s_at
2263	FGFR2	Kinase	Classical MAPK	FGFR			10064.4	211400_at	1400		#N/A	Kd>10 uM	#N/A	#N/A
8517	IKBKG												#N/A	#N/A
3552	IL1A												#N/A	#N/A
3553	IL1B												#N/A	#N/A
3554	IL1R1		JNK & p38	IL1R	2.036	202948_at							#N/A	#N/A
7850	IL1R2												47.254	205403_at
3725	JUN		JNK & p38	c-JUN	5.495	201464_x_at	764.367	201466_s_at					#N/A	#N/A
3727	JUND		JNK & p38	JunD	5.495	203752_s_at							404.367	203752_s_at
3845	KRAS												#N/A	#N/A
2261	FGFR3	Kinase	Classical MAPK	FGFR	127.564	204379_s_at			Kd>10 uM	FGFR3	>5000	Kd>10 uM	#N/A	#N/A
8649	MAP2K1IP1												#N/A	#N/A
2264	FGFR4	Kinase							Kd>10 uM		#N/A	Kd>10 uM	#N/A	#N/A
5604	MAP2K1	Kinase	Classical MAPK	MEK1					1000		#N/A	Kd>10 uM	#N/A	#N/A
5605	MAP2K2	Kinase	Classical MAPK	MEK2					1400	MAP2K2	>5000	Kd>10 uM	#N/A	#N/A
5606	MAP2K3	Kinase	p38	MKK3	0.279	215498_s_at	12.571	215499_at	Kd>10 uM		#N/A	Kd>10 uM	1004.37	215498_s_at
6416	MAP2K4	Kinase							Kd>10 uM		#N/A	Kd>10 uM	584.367	203266_s_at
5608	MAP2K6	Kinase	JNK & p38	MKK6			3584.37	205698_s_at	Kd>10 uM		#N/A	Kd>10 uM	#N/A	#N/A
4294	MAP3K10	Kinase							Kd>10 uM		#N/A	Kd>10 uM	#N/A	#N/A
7786	MAP3K12	Kinase	JNK & p38	MUK			209.592	205447_s_at	Kd>10 uM		#N/A	Kd>10 uM	#N/A	#N/A
4216	MAP3K4	Kinase	DNA damage	MEKK4					310	MAP3K4	833.12	Kd>10 uM	764.367	216199_s_at
4217	MAP3K5	Kinase							Kd>10 uM	MAP3K5	>5000	Kd>10 uM	644.367	203836_s_at
11184	MAP4K1	Kinase	JNK & p38	HPK1			10184.4	214339_s_at	980	HPK1	>5000	Kd>10 uM	#N/A	#N/A
8491	MAP4K3	Kinase	JNK & p38	GLK					640	KHS2	>5000	Kd>10 uM	#N/A	#N/A
9448	MAP4K4	Kinase	JNK & p38	HGK					3100	ZC1_HGK	>5000	Kd>10 uM	5444.37	218181_s_at
5594	MAPK1	Kinase							Kd>10 uM	Erk2	>5000	Kd>10 uM	#N/A	#N/A
5600	MAPK11	Kinase	JNK & p38	p38					410	p38b	>5000	Kd>10 uM	#N/A	#N/A
6300	MAPK12	Kinase	JNK & p38	p38			0.89	206106_at	Kd>10 uM		#N/A	Kd>10 uM	#N/A	#N/A
1432	MAPK14	Kinase	JNK & p38	p38					27	p38a	2118.72	Kd>10 uM	#N/A	#N/A
10454	MAP3K7IP1												#N/A	#N/A
23118	MAP3K7IP2												#N/A	#N/A
5595	MAPK3	Kinase							Kd>10 uM	Erk1	>5000	Kd>10 uM	#N/A	#N/A
5598	MAPK7	Kinase							Kd>10 uM		#N/A	Kd>10 uM	#N/A	#N/A
5601	MAPK9	Kinase							Kd>10 uM	JNK2	>5000	Kd>10 uM	#N/A	#N/A
9261	MAPKAPK2	Kinase							Kd>10 uM		#N/A	Kd>10 uM	#N/A	#N/A
8550	MAPKAPK5	Kinase							Kd>10 uM		#N/A	Kd>10 uM	#N/A	#N/A
8569	MKNK1	Kinase	Classical MAPK	MKN1/2					Kd>10 uM		#N/A	Kd>10 uM	#N/A	#N/A
2872	MKNK2	Kinase							Kd>10 uM		#N/A	Kd>10 uM	#N/A	#N/A
51701	NLK	Kinase	?	NLK					260	NLK	826.683	Kd>10 uM	#N/A	#N/A
4914	NTRK1	Kinase							Kd>10 uM	TRKA	>5000	Kd>10 uM	#N/A	#N/A
4915	NTRK2	Kinase							Kd>10 uM		#N/A	Kd>10 uM	#N/A	#N/A
5058	PAK1	Kinase							Kd>10 uM		#N/A	Kd>10 uM	#N/A	#N/A
5062	PAK2	Kinase							Kd>10 uM		#N/A	Kd>10 uM	2984.37	208876_s_at
5566	PRKACA	Kinase							Kd>10 uM		#N/A	Kd>10 uM	#N/A	#N/A
5567	PRKACB	Kinase							Kd>10 uM		#N/A	Kd>10 uM	33.937	202742_s_at
9479	MAPK8IP1												#N/A	#N/A
23542	MAPK8IP2												#N/A	#N/A
23162	MAPK8IP3												#N/A	#N/A
5613	PRKX	Kinase							Kd>10 uM		#N/A	Kd>10 uM	#N/A	#N/A
6195	RPS6KA1	Kinase							Kd>10 uM	RSK3	>5000	Kd>10 uM	#N/A	#N/A
6196	RPS6KA2	Kinase							Kd>10 uM	RSK1	>5000	Kd>10 uM	#N/A	#N/A
6197	RPS6KA3	Kinase	Classical MAPK	RSK2			5564.37	203843_at	Kd>10 uM	RSK2	>5000	Kd>10 uM	#N/A	#N/A
4137	MAPT												#N/A	#N/A
4149	MAX												#N/A	#N/A
4208	MEF2C												#N/A	#N/A
8986	RPS6KA4	Kinase							Kd>10 uM		#N/A	Kd>10 uM	#N/A	#N/A
9252	RPS6KA5	Kinase	JNK & p38	MSK1/2	40.046	204633_s_at			Kd>10 uM		#N/A	Kd>10 uM	#N/A	#N/A
27330	RPS6KA6	Kinase							Kd>10 uM		#N/A	Kd>10 uM	#N/A	#N/A
22808	MRAS												#N/A	#N/A
4609	MYC		Classical MAPK	cMyc	0.542	202431_s_at							#N/A	#N/A
4763	NF1		Classical MAPK	NF1			2.402	212676_at					#N/A	#N/A
4773	NFATC2												#N/A	#N/A
4776	NFATC4												#N/A	#N/A
4790	NFKB1												#N/A	#N/A
4791	NFKB2												#N/A	#N/A
4803	NGFB												#N/A	#N/A
6788	STK3	Kinase	JNK & p38	MST1/2			2144.37	204068_at	Kd>10 uM		#N/A	Kd>10 uM	#N/A	#N/A
3164	NR4A1		ERK5	Nur77			3464.37	202340_x_at					77.64	211143_x_at
4893	NRAS												#N/A	#N/A
4908	NTF3												#N/A	#N/A
4909	NTF4												#N/A	#N/A
6789	STK4	Kinase	?	MST1/2	3.946	211085_s_at			Kd>10 uM		#N/A	Kd>10 uM	#N/A	#N/A
7046	TGFBR1	Kinase	JNK & p38	TGFBR					230	TGFbR1	>5000	Kd>10 uM	#N/A	#N/A
7048	TGFBR2	Kinase	JNK & p38	TGFBR	1.462	208944_at			2900	TGFbR2	2449.8	Kd>10 uM	4664.37	208944_at
130399	ACVR1C	Kinase							#N/A		#N/A	#N/A	#N/A	#N/A
5154	PDGFA		Classical MAPK	PDGF	6344.37	216867_s_at	6764.37	205463_s_at					#N/A	#N/A
5155	PDGFB												#N/A	#N/A
1147	CHUK	Kinase							#N/A		#N/A	#N/A	1004.37	209666_s_at
3551	IKBKB	Kinase							#N/A		#N/A	#N/A	#N/A	#N/A
8399	PLA2G10												#N/A	#N/A
81579	PLA2G12A												#N/A	#N/A
84647	PLA2G12B												#N/A	#N/A
5319	PLA2G1B												#N/A	#N/A
5320	PLA2G2A		Classical MAPK	cPLA2	247.319	203649_s_at							#N/A	#N/A
26279	PLA2G2D												#N/A	#N/A
30814	PLA2G2E												#N/A	#N/A
64600	PLA2G2F												#N/A	#N/A
50487	PLA2G3		Classical MAPK	cPLA2	6.484	220780_at							#N/A	#N/A
5321	PLA2G4A												#N/A	#N/A
8681	PLA2G4B												#N/A	#N/A
100137049	PLA2G4B												#N/A	#N/A
5322	PLA2G5												#N/A	#N/A
8398	PLA2G6												#N/A	#N/A
5494	PPM1A	Phosphatase											#N/A	#N/A
5495	PPM1B	Phosphatase	JNK & p38	PP2CD			17804.4	213225_at					#N/A	#N/A
5530	PPP3CA	Phosphatase											#N/A	#N/A
5532	PPP3CB	Phosphatase	?	PPP3C			13304.4	202432_at					#N/A	#N/A
5533	PPP3CC	Phosphatase											#N/A	#N/A
5534	PPP3R1												#N/A	#N/A
5535	PPP3R2	Phosphatase											#N/A	#N/A
5536	PPP5C	Phosphatase											#N/A	#N/A
5607	MAP2K5	Kinase	ERK5	MEK5			4.657	204756_at	#N/A	MAP2K5	2721.78	#N/A	#N/A	#N/A
5609	MAP2K7	Kinase							#N/A		#N/A	#N/A	#N/A	#N/A
4214	MAP3K1	Kinase							#N/A	MAP3K1	>5000	#N/A	#N/A	#N/A
9175	MAP3K13	Kinase							#N/A		#N/A	#N/A	#N/A	#N/A
9020	MAP3K14	Kinase							#N/A		#N/A	#N/A	#N/A	#N/A
10746	MAP3K2	Kinase	?	MEKK2/3					#N/A	MAP3K2	1276.48	#N/A	#N/A	#N/A
4215	MAP3K3	Kinase	?	MEKK2/3	10364.4	203514_at			#N/A	MAP3K3	>5000	#N/A	#N/A	#N/A
9064	MAP3K6	Kinase							#N/A		#N/A	#N/A	#N/A	#N/A
84867	PTPN5	Phosphatase											#N/A	#N/A
5778	PTPN7	Phosphatase											#N/A	#N/A
5801	PTPRR	Phosphatase											#N/A	#N/A
5879	RAC1												#N/A	#N/A
5880	RAC2												#N/A	#N/A
5881	RAC3												#N/A	#N/A
6885	MAP3K7	Kinase							#N/A		#N/A	#N/A	291.836	206853_s_at
5906	RAP1A												#N/A	#N/A
5908	RAP1B												#N/A	#N/A
9693	RAPGEF2												#N/A	#N/A
5921	RASA1												#N/A	#N/A
5922	RASA2												#N/A	#N/A
5923	RASGRF1												#N/A	#N/A
5924	RASGRF2												#N/A	#N/A
10125	RASGRP1												#N/A	#N/A
10235	RASGRP2												#N/A	#N/A
25780	RASGRP3												#N/A	#N/A
115727	RASGRP4												#N/A	#N/A
1326	MAP3K8	Kinase							#N/A		#N/A	#N/A	#N/A	#N/A
5871	MAP4K2	Kinase							#N/A	GCK	>5000	#N/A	#N/A	#N/A
5603	MAPK13	Kinase							#N/A		#N/A	#N/A	#N/A	#N/A
7867	MAPKAPK3	Kinase							#N/A		#N/A	#N/A	#N/A	#N/A
4342	MOS	Kinase							#N/A		#N/A	#N/A	#N/A	#N/A
5568	PRKACG	Kinase							#N/A		#N/A	#N/A	#N/A	#N/A
6237	RRAS												#N/A	#N/A
22800	RRAS2		Classical MAPK	RAS			18284.4	208456_s_at					91.615	212589_at
6654	SOS1		Classical MAPK	SOS	9.029	212780_at							584.367	212780_at
6655	SOS2												#N/A	#N/A
6722	SRF												#N/A	#N/A
5578	PRKCA	Kinase	Classical MAPK	PKC			344.367	213093_at	#N/A	PKCa	>5000	#N/A	#N/A	#N/A
5579	PRKCB1	Kinase							#N/A	PKCb	>5000	#N/A	#N/A	#N/A
3925	STMN1												#N/A	#N/A
5582	PRKCG	Kinase							#N/A		#N/A	#N/A	#N/A	#N/A
5616	PRKY	Kinase							#N/A		#N/A	#N/A	#N/A	#N/A
57551	TAOK1	Kinase	DNA damage	TAO1/2					#N/A	TAO1	2429.93	#N/A	#N/A	#N/A
7040	TGFB1												#N/A	#N/A
7042	TGFB2												#N/A	#N/A
7043	TGFB3												#N/A	#N/A
9344	TAOK2	Kinase							#N/A	TAO2	>5000	#N/A	#N/A	#N/A
51347	TAOK3	Kinase							#N/A	TAO3	>5000	#N/A	#N/A	#N/A
7124	TNF												#N/A	#N/A
7132	TNFRSF1A		JNK & p38	TNFR	20.655	207643_s_at	28.76	207643_s_at					8024.37	207643_s_at
7157	TP53												#N/A	#N/A
7186	TRAF2												#N/A	#N/A
7189	TRAF6												#N/A	#N/A
