# Supplementary material for: Transcriptional Profiling of the Dose Response: A More Powerful Approach for Characterizing Drug Activities
Source: PLoS Comput Biol. 2009 Sep 18;5(9):e1000512. doi: 10.1371/journal.pcbi.1000512 (PMC2735650; doi:10.1371/journal.pcbi.1000512)
Supplement: Table S6 — KEGG 04110 cell cycle response transcripts (0.06 MB XLS) [file pcbi.1000512.s007.xls]

## Sheet: 205 probesets in KEGG hsa04110 
Probeset	LocusLink ID	Was the probeset used in Figure 6?	Gene name in KEGG:hsa04110	Description	20 hour dasatinib SDRS P value	20 hour imatinib SDRS P value	20 hour nilotinib SDRS P value	Dasatinib Response transcript (p<0.05) EC50, nM	Imatinib Response transcript (p<0.05) EC50, nM	Nilotinib Response transcript (p<0.05) EC50, nM
209112_at	1027		CDKN1B	cyclin-dependent kinase inhibitor 1B (p27, Kip1)	0.038296	0.47471	0.0212	0.89		0.89
204244_s_at	10926	Y	DBF4	DBF4 homolog (S. cerevisiae)	0.0026625	0.13922	0.011786	1.05		8324.37
217879_at	996		CDC27	cell division cycle 27 homolog (S. cerevisiae)	0.0098406	0.16916	0.19171	3.344
209974_s_at	9184	Y	BUB3	BUB3 budding uninhibited by benzimidazoles 3 homolog (yeast)	0.0032418	0.097611	0.0045712	5.495		17564.4
204695_at	993	Y	CDC25A	cell division cycle 25 homolog A (S. pombe)	0.0019684	0.29485	0.081118	6.484
217010_s_at	995		CDC25C	cell division cycle 25 homolog C (S. pombe)	0.014766	0.65106	0.30771	7.651
209642_at	699	Y	BUB1	BUB1 budding uninhibited by benzimidazoles 1 homolog (yeast)	2.5343e-06	0.0081333	0.00086698	10.654	524.367	4844.37
214710_s_at	891	Y	CCNB1	Cyclin B1	1.195e-06	0.045133	1.9059e-05	10.654	11804.4	8324.37
204267_x_at	9088	Y	PKMYT1	protein kinase, membrane associated tyrosine/threonine 1	0.0066589	0.78005	0.033914	10.654		12824.4
204147_s_at	7027		TFDP1	Transcription factor Dp-1	0.012842	0.13345	0.54424	10.654
205085_at	4998		ORC1L	origin recognition complex, subunit 1-like (yeast)	0.0014729	0.003589	0.28383	12.571	291.836
205398_s_at	4088		SMAD3	SMAD family member 3	0.013516	0.092406	1.6986e-05	12.571		12404.4
201589_at	8243	Y	SMC1A	Structural maintenance of chromosomes 1A	0.0035434	0.51819	0.0031143	12.571		10724.4
205394_at	1111		CHEK1	CHK1 checkpoint homolog (S. pombe)	0.00041359	0.32896	0.25012	12.571
202705_at	9133	Y	CCNB2	Cyclin B2	5.0986e-06	0.67226	1.2386e-05	14.834		9284.37
204252_at	1017	Y	CDK2	Cyclin-dependent kinase 2	3.4132e-05	0.2368	0.030886	14.834		7484.37
203554_x_at	9232	Y	PTTG1	Pituitary tumor-transforming 1	0.0010113	0.11498	6.8365e-05	14.834		6704.37
201555_at	4172	Y	MCM3	minichromosome maintenance complex component 3	0.00027923	0.022318	1.9675e-05	17.504	2204.37	10544.4
210028_s_at	23595		ORC3L	origin recognition complex, subunit 3-like (yeast)	0.0027533	0.79987	0.00297	17.504		10664.4
219105_x_at	23594	Y	ORC6L	origin recognition complex, subunit 6 like (yeast)	0.00017908	0.055661	0.0012193	17.504		14864.4
210559_s_at	983	Y	CDC2	Cell division cycle 2, G1 to S and G2 to M	6.1684e-06	0.47383	6.7393e-06	20.655		9584.37
211804_s_at	1017	Y	CDK2	Cyclin-dependent kinase 2	2.8319e-05	0.25267	0.0087654	20.655		6944.37
202870_s_at	991	Y	CDC20	cell division cycle 20 homolog (S. cerevisiae)	9.7708e-07	0.82817	5.1066e-05	24.373		8744.37
38158_at	9700	Y	ESPL1	extra spindle pole bodies homolog 1 (S. cerevisiae)	0.00017213	0.52446	0.00018425	24.373		10004.4
208022_s_at	8555	Y	CDC14B	CDC14 cell division cycle 14 homolog B (S. cerevisiae)	0.007073	0.024044	0.0030442	28.76	1604.37	3344.37
203755_at	701	Y	BUB1B	BUB1 budding uninhibited by benzimidazoles 1 homolog beta (yeast)	1.1088e-05	0.068769	0.0019595	28.76		11084.4
205167_s_at	995	Y	CDC25C	cell division cycle 25 homolog C (S. pombe)	1.9192e-06	0.14573	8.6734e-05	28.76		8864.37
202240_at	5347	Y	PLK1	polo-like kinase 1 (Drosophila)	1.6511e-05	0.019056	0.00042543	33.937	1904.37	7304.37
203418_at	890	Y	CCNA2	Cyclin A2	1.4817e-06	0.17838	0.00011201	33.937		8804.37
204817_at	9700	Y	ESPL1	extra spindle pole bodies homolog 1 (S. cerevisiae)	0.00012727	0.52301	0.0010617	33.937		10124.4
202246_s_at	1019		CDK4	Cyclin-dependent kinase 4	0.00093814	0.32867	0.56217	33.937
213523_at	898	Y	CCNE1	Cyclin E1	0.005542	0.24531	0.010621	40.046		12104.4
222037_at	4173	Y	MCM4	{UNVALIDATED HIT} minichromosome maintenance complex component 4	0.00049555	0.39944	0.00023116	40.046		10424.4
201755_at	4174	Y	MCM5	minichromosome maintenance complex component 5	0.00040508	0.80812	0.00045275	40.046		9704.37
210983_s_at	4176	Y	MCM7	minichromosome maintenance complex component 7	2.6923e-05	0.59757	5.9939e-06	47.254		10244.4
203968_s_at	990	Y	CDC6	cell division cycle 6 homolog (S. cerevisiae)	2.1333e-05	0.90057	0.072119	47.254
215509_s_at	699	Y	BUB1	BUB1 budding uninhibited by benzimidazoles 1 homolog (yeast)	0.00010277	0.46563	0.00086435	55.76		7364.37
203214_x_at	983	Y	CDC2	Cell division cycle 2, G1 to S and G2 to M	3.0736e-06	0.3634	0.00012037	55.76		9644.37
222036_s_at	4173	Y	MCM4	{UNVALIDATED HIT} minichromosome maintenance complex component 4	0.0002268	0.717	0.00016215	55.76		10784.4
216237_s_at	4174	Y	MCM5	minichromosome maintenance complex component 5	8.7157e-05	0.64689	0.0004449	55.76		10604.4
203077_s_at	4087		SMAD2	SMAD family member 2	3.1034e-05	0.65345	0.64215	55.76
217881_s_at	996	Y	CDC27	cell division cycle 27 homolog (S. cerevisiae)	0.012948	0.32925	0.01167	65.796		5324.37
203075_at	4087		SMAD2	SMAD family member 2	0.00033572	0.49481	0.47427	77.64
202107_s_at	4171	Y	MCM2	minichromosome maintenance complex component 2	6.1701e-05	0.023546	4.5468e-05	91.615	344.367	11084.4
204159_at	1031	Y	CDKN2C	Cyclin-dependent kinase inhibitor 2C (p18, inhibits CDK4)	0.00041924	0.81779	0.00065891	91.615		9644.37
212142_at	4173	Y	MCM4	minichromosome maintenance complex component 4	3.0609e-06	0.66068	0.0029465	91.615		9524.37
201457_x_at	9184		BUB3	BUB3 budding uninhibited by benzimidazoles 3 homolog (yeast)	0.0019057	0.01128	0.0011313	108.105	7484.37	10604.4
204126_s_at	8318		CDC45L	CDC45 cell division cycle 45-like (S. cerevisiae)	6.3015e-07	0.10795	0.0032189	108.105		8804.37
210567_s_at	6502		SKP2	S-phase kinase-associated protein 2 (p45)	0.0055759	0.12468	0.90259	108.105
212141_at	4173		MCM4	minichromosome maintenance complex component 4	6.8751e-05	0.25181	0.00062842	127.564		10484.4
220407_s_at	7042		TGFB2	Transforming growth factor, beta 2	0.016912	0.40198	0.09604	127.564
212330_at	7027		TFDP1	Transcription factor Dp-1	0.0011135	0.018376	0.0042777	150.526	584.367	11204.4
204510_at	8317		CDC7	cell division cycle 7 homolog (S. cerevisiae)	0.0013222	0.64451	0.27659	150.526
213226_at	890		CCNA2	{ZERO PROBES MATCH} Cyclin A2	0.00019095	0.32066	0.0020157	177.621		8324.37
203213_at	983		CDC2	{ZERO PROBES MATCH} Cell division cycle 2, G1 to S and G2 to M	6.642e-05	0.29079	3.524e-06	177.621		9404.37
201930_at	4175		MCM6	minichromosome maintenance complex component 6	6.7289e-06	0.013661	0.00012653	209.592	1304.37	10244.4
221555_x_at	8555		CDC14B	CDC14 cell division cycle 14 homolog B (S. cerevisiae)	0.01497	0.088567	0.29665	209.592
203967_at	990		CDC6	cell division cycle 6 homolog (S. cerevisiae)	6.5142e-05	0.032934	0.0052359	247.319	1664.37	13484.4
203362_s_at	4085		MAD2L1	MAD2 mitotic arrest deficient-like 1 (yeast)	0.0010871	0.57109	0.00022238	291.836		9224.37
203626_s_at	6502		SKP2	S-phase kinase-associated protein 2 (p45)	0.034496	0.74314	0.61494	291.836
203626_s_at	6502		SKP2	S-phase kinase-associated protein 2 (p45)	0.034496	0.74314	0.61494	291.836
208795_s_at	4176		MCM7	minichromosome maintenance complex component 7	0.00028417	0.26095	0.00059242	344.367		10964.4
221556_at	8555		CDC14B	CDC14 cell division cycle 14 homolog B (S. cerevisiae)	2.7177e-05	0.0071216	0.00273	584.367	209.592	3164.37
215711_s_at	7465		WEE1	WEE1 homolog (S. pombe)	0.0054397	0.51676	0.021862	584.367		10964.4
210742_at	8556		CDC14A	CDC14 cell division cycle 14 homolog A (S. cerevisiae)	0.0090865	#N/A	#N/A	824.367
218284_at	4088		SMAD3	SMAD family member 3	0.017778	0.76786	0.0086663	944.367		15824.4
210543_s_at	5591		PRKDC	protein kinase, DNA-activated, catalytic polypeptide	0.011759	0.56845	0.0028348	1004.37		9584.37
205393_s_at	1111		CHEK1	CHK1 checkpoint homolog (S. pombe)	0.015701	0.33188	0.6287	1004.37
201020_at	7533		YWHAH	Tyrosine 3-monooxygenase/tryptophan 5-monooxygenase activation protein, eta polypeptide	0.00032858	0.74778	0.022975	1304.37		11444.4
212332_at	5934		RBL2	retinoblastoma-like 2 (p130)	0.038052	0.064215	0.79575	1484.37
211347_at	168448, 8555		CDC14B	{ZERO PROBES MATCH} CDC14 cell division cycle 14 homolog B (S. cerevisiae)	0.044728	0.26933	0.18699	1484.37
207574_s_at	4616		GADD45B	Growth arrest and DNA-damage-inducible, beta	2.8777e-07	0.0024382	0.2368	1724.37	2084.37
205034_at	9134		CCNE2	Cyclin E2	0.0003134	0.86009	0.00083231	1784.37		12524.4
210858_x_at	472		ATM	Ataxia telangiectasia mutated	0.036024	0.2499	0.078203	1784.37
203085_s_at	7040		TGFB1	transforming growth factor, beta 1	0.0018198	0.89038	0.76113	2084.37
211814_s_at	9134		CCNE2	Cyclin E2	0.00073962	0.59979	0.061342	2684.37
218117_at	9978		RBX1	Ring-box 1	0.013153	0.2321	0.28555	2864.37
209304_x_at	4616		GADD45B	Growth arrest and DNA-damage-inducible, beta	7.8062e-06	0.0066141	0.22941	3344.37	2384.37
200711_s_at	6500		SKP1A	S-phase kinase-associated protein 1A (p19A)	3.5826e-05	0.075414	0.44679	3344.37
203076_s_at	4087		SMAD2	SMAD family member 2	0.0028246	0.28753	0.091125	3344.37
201700_at	896		CCND3	Cyclin d3	0.0023922	0.0027264	0.036086	4124.37	5144.37	4124.37
211792_s_at	1031		CDKN2C	Cyclin-dependent kinase inhibitor 2C (p18, inhibits CDK4)	0.0067549	0.67842	0.055836	4124.37
208743_s_at	7529		YWHAB	Tyrosine 3-monooxygenase/tryptophan 5-monooxygenase activation protein, beta polypeptide	0.0062299	0.86216	0.18096	4424.37
200693_at	10971		YWHAQ	Tyrosine 3-monooxygenase/tryptophan 5-monooxygenase activation protein, theta polypeptide	0.0005735	0.38422	0.035798	4844.37		7784.37
209305_s_at	4616		GADD45B	Growth arrest and DNA-damage-inducible, beta	9.8843e-05	0.0018566	0.010404	5204.37	944.367	9.029
209909_s_at	7042		TGFB2	{UNVALIDATED HIT} Transforming growth factor, beta 2	0.027117	0.5488	0.13975	5804.37
201833_at	3066		HDAC2	Histone deacetylase 2	0.0019612	0.0033528	0.226	7604.37	8684.37
200639_s_at	7534		YWHAZ	Tyrosine 3-monooxygenase/tryptophan 5-monooxygenase activation protein, zeta polypeptide	0.001099	0.73458	0.67657	8984.37
200719_at	6500		SKP1A	{ZERO PROBES MATCH} S-phase kinase-associated protein 1A (p19A)	0.039798	0.33305	0.66189	9284.37
208694_at	5591		PRKDC	protein kinase, DNA-activated, catalytic polypeptide	0.01897	0.65345	0.037182	9824.37		8564.37
211297_s_at	1022		CDK7	cyclin-dependent kinase 7 (MO15 homolog, Xenopus laevis, cdk-activating kinase)	0.0011416	0.45715	0.44557	11024.4
201202_at	5111		PCNA	Proliferating cell nuclear antigen	6.7104e-06	0.74182	1.0414e-05	11444.4		7784.37
33322_i_at	2810		SFN	Stratifin	9.0545e-06	0.0012566	0.07289	11864.4	5144.37
33323_r_at	2810		SFN	Stratifin	1.67e-05	0.00026285	0.1681	12224.4	7604.37
202284_s_at	1026		CDKN1A	cyclin-dependent kinase inhibitor 1A (p21, Cip1)	1.0692e-09	0.0011729	0.0008861	12224.4	6704.37	17144.4
207614_s_at	8454		CUL1	Cullin 1	0.00451	0.0042854	0.13943	12284.4	524.367
212426_s_at	10971		YWHAQ	Tyrosine 3-monooxygenase/tryptophan 5-monooxygenase activation protein, theta polypeptide	0.020551	0.68277	0.094633	12344.4
201209_at	3065		HDAC1	Histone deacetylase 1	0.011066	0.0012334	0.40016	12404.4	404.367
213699_s_at	10971		YWHAQ	Tyrosine 3-monooxygenase/tryptophan 5-monooxygenase activation protein, theta polypeptide	0.00092711	0.81088	0.036798	12464.4		5504.37
209260_at	2810		SFN	Stratifin	6.3811e-06	0.0016375	0.45422	13004.4	7484.37
217373_x_at	4193		MDM2	Mdm2, transformed 3T3 cell double minute 2, p53 binding protein (mouse)	1.1211e-08	0.19405	0.080623	13124.4
200640_at	7534		YWHAZ	Tyrosine 3-monooxygenase/tryptophan 5-monooxygenase activation protein, zeta polypeptide	0.0035372	0.87046	0.43035	14084.4
217718_s_at	7529		YWHAB	Tyrosine 3-monooxygenase/tryptophan 5-monooxygenase activation protein, beta polypeptide	0.010215	0.37365	0.64215	14204.4
201853_s_at	994		CDC25B	cell division cycle 25 homolog B (S. pombe)	0.017145	0.079644	0.020027	15164.4		17144.4
211832_s_at	4193		MDM2	Mdm2, transformed 3T3 cell double minute 2, p53 binding protein (mouse)	0.0025197	0.90192	0.5674	15824.4
209659_s_at	8881		CDC16	cell division cycle 16 homolog (S. cerevisiae)	0.46734	0.036128	0.61835		291.836
209416_s_at	51343		FZR1	fizzy/cell division cycle 20 related 1 (Drosophila)	0.47865	0.03619	0.13477		9344.37
209414_at	51343		FZR1	fizzy/cell division cycle 20 related 1 (Drosophila)	0.7112	0.033401	0.56061		19724.4
202123_s_at	25		ABL1	V-abl Abelson murine leukemia viral oncogene homolog 1	0.30397	0.57961	0.19342
212672_at	472		ATM	Ataxia telangiectasia mutated	0.43232	0.64629	0.81226
209903_s_at	545		ATR	ataxia telangiectasia and Rad3 related	0.82055	0.2232	0.6009
208711_s_at	595		CCND1	Cyclin D1	0.056224	0.85801	0.23365
208712_at	595		CCND1	Cyclin D1	0.15791	0.7112	0.097887
215508_at	699		BUB1	{ZERO PROBES MATCH} BUB1 budding uninhibited by benzimidazoles 1 homolog (yeast)	#N/A	#N/A	#N/A
216275_at	699		BUB1	{ZERO PROBES MATCH} BUB1 budding uninhibited by benzimidazoles 1 homolog (yeast)	0.67842	0.59868	0.42027
216277_at	699		BUB1	{ZERO PROBES MATCH} BUB1 budding uninhibited by benzimidazoles 1 homolog (yeast)	0.49298	0.8358	0.33572
200953_s_at	894		CCND2	Cyclin D2	#N/A	#N/A	0.011654			4904.37
200951_s_at	894		CCND2	Cyclin D2	#N/A	#N/A	#N/A
200952_s_at	894		CCND2	Cyclin D2	0.31563	0.2478	0.22769
204093_at	902		CCNH	Cyclin H	0.45548	0.2394	0.94786
204696_s_at	993		CDC25A	cell division cycle 25 homolog A (S. pombe)	0.16797	0.9654	0.19914
216914_at	995		CDC25C	{ZERO PROBES MATCH} cell division cycle 25 homolog C (S. pombe)	0.49117	0.44761	0.40601
217878_s_at	996		CDC27	cell division cycle 27 homolog (S. cerevisiae)	0.15976	0.87736	0.28878
211803_at	1017		CDK2	{ZERO PROBES MATCH} Cyclin-dependent kinase 2	#N/A	0.21666	#N/A
214160_at	1021		CDK6	{UNVALIDATED HIT} Cyclin-dependent kinase 6	#N/A	#N/A	#N/A
207143_at	1021		CDK6	Cyclin-dependent kinase 6	0.41913	0.6235	0.31042
213183_s_at	1028		CDKN1C	{UNVALIDATED HIT} cyclin-dependent kinase inhibitor 1C (p57, Kip2)	#N/A	#N/A	#N/A
213348_at	1028		CDKN1C	{UNVALIDATED HIT} cyclin-dependent kinase inhibitor 1C (p57, Kip2)	0.16837	#N/A	#N/A
219533_at	1028		CDKN1C	{ZERO PROBES MATCH} cyclin-dependent kinase inhibitor 1C (p57, Kip2)	0.071122	0.8358	0.76921
213182_x_at	1028		CDKN1C	cyclin-dependent kinase inhibitor 1C (p57, Kip2)	0.56687	0.068589	0.79232
216894_x_at	1028		CDKN1C	cyclin-dependent kinase inhibitor 1C (p57, Kip2)	0.24676	0.55032	0.82194
219534_x_at	1028		CDKN1C	cyclin-dependent kinase inhibitor 1C (p57, Kip2)	0.77937	0.65046	0.66797
207039_at	1029		CDKN2A	cyclin-dependent kinase inhibitor 2A (melanoma, p16, inhibits CDK4)	#N/A	#N/A	#N/A
209644_x_at	1029		CDKN2A	cyclin-dependent kinase inhibitor 2A (melanoma, p16, inhibits CDK4)	0.74314	0.93351	0.6155
211156_at	1029		CDKN2A	cyclin-dependent kinase inhibitor 2A (melanoma, p16, inhibits CDK4)	0.17557	0.62465	0.83858
207530_s_at	1030		CDKN2B	cyclin-dependent kinase inhibitor 2B (p15, inhibits CDK4)	0.49344	0.51248	0.55185
213586_at	1032		CDKN2D	{UNVALIDATED HIT} cyclin-dependent kinase inhibitor 2D (p19, inhibits CDK4)	0.6009	0.82679	0.59813
210240_s_at	1032		CDKN2D	cyclin-dependent kinase inhibitor 2D (p19, inhibits CDK4)	0.29485	0.63335	0.42373
202160_at	1387		CREBBP	CREB binding protein (Rubinstein-Taybi syndrome)	0.19063	0.56165	0.09604
211808_s_at	1387		CREBBP	CREB binding protein (Rubinstein-Taybi syndrome)	0.69466	0.54424	0.59372
38707_r_at	1874		E2F4	E2F transcription factor 4, p107/p130-binding	0.74712	0.82887	0.88148
202248_at	1874		E2F4	E2F transcription factor 4, p107/p130-binding	0.49939	0.25985	0.48131
222051_s_at	1875		E2F5	{UNVALIDATED HIT} E2F transcription factor 5, p130-binding	#N/A	#N/A	#N/A
221586_s_at	1875		E2F5	E2F transcription factor 5, p130-binding	0.068319	0.074461	0.17881
213579_s_at	2033		EP300	E1A binding protein p300	0.51772	0.82402	0.64867
202221_s_at	2033		EP300	E1A binding protein p300	0.21612	0.90057	0.61778
209945_s_at	2932		GSK3B	Glycogen synthase kinase 3 beta	0.20982	0.81986	0.18038
205397_x_at	4088		SMAD3	SMAD family member 3	0.49526	0.79643	0.04072			11564.4
205396_at	4088		SMAD3	SMAD family member 3	0.23152	0.64274	0.084338
202526_at	4089		SMAD4	{ZERO PROBES MATCH} SMAD family member 4	#N/A	#N/A	#N/A
202527_s_at	4089		SMAD4	SMAD family member 4	0.55185	0.92514	0.86562
205385_at	4193		MDM2	Mdm2, transformed 3T3 cell double minute 2, p53 binding protein (mouse)	0.081672	#N/A	0.54778
205386_s_at	4193		MDM2	Mdm2, transformed 3T3 cell double minute 2, p53 binding protein (mouse)	#N/A	#N/A	#N/A
213560_at	4616		GADD45B	{UNVALIDATED HIT} Growth arrest and DNA-damage-inducible, beta	0.63861	0.45381	0.69089
204853_at	4999		ORC2L	origin recognition complex, subunit 2-like (yeast)	0.12042	0.72999	0.73786
203351_s_at	5000		ORC4L	origin recognition complex, subunit 4-like (yeast)	0.60704	0.21172	0.59923
203352_at	5000		ORC4L	origin recognition complex, subunit 4-like (yeast)	0.055035	0.12349	0.75511
204957_at	5001		ORC5L	origin recognition complex, subunit 5-like (yeast)	0.051775	0.13548	0.05014
211212_s_at	5001		ORC5L	origin recognition complex, subunit 5-like (yeast)	0.46264	0.78345	0.10178
211213_at	5001		ORC5L	origin recognition complex, subunit 5-like (yeast)	#N/A	#N/A	#N/A
203132_at	5925		RB1	retinoblastoma 1 (including osteosarcoma)	0.16509	0.8856	0.38008
211540_s_at	5925		RB1	retinoblastoma 1 (including osteosarcoma)	0.10756	0.091635	0.43272
212331_at	5934		RBL2	retinoblastoma-like 2 (p130)	0.055243	0.56898	0.27141
200718_s_at	6500		SKP1A	S-phase kinase-associated protein 1A (p19A)	0.20948	0.44598	0.34082
207974_s_at	6500		SKP1A	S-phase kinase-associated protein 1A (p19A)	0.069086	0.47998	0.49071
203084_at	7040		TGFB1	transforming growth factor, beta 1	0.64451	0.42373	0.25503
209908_s_at	7042		TGFB2	{UNVALIDATED HIT} Transforming growth factor, beta 2	#N/A	#N/A	#N/A
220406_at	7042		TGFB2	{ZERO PROBES MATCH} Transforming growth factor, beta 2	#N/A	#N/A	#N/A
209747_at	7043		TGFB3	{POOR HIT 64%} Transforming growth factor, beta 3	0.25787	0.70672	0.25963
211300_s_at	7157		TP53	tumor protein p53 (Li-Fraumeni syndrome)	0.53624	0.33512	0.0046149			5.495
201746_at	7157		TP53	tumor protein p53 (Li-Fraumeni syndrome)	0.36113	0.25568	0.093184
212533_at	7465		WEE1	WEE1 homolog (S. pombe)	0.057372	0.52398	0.047197			65.796
217717_s_at	7529		YWHAB	Tyrosine 3-monooxygenase/tryptophan 5-monooxygenase activation protein, beta polypeptide	0.17281	0.52253	0.75778
210996_s_at	7531		YWHAE	Tyrosine 3-monooxygenase/tryptophan 5-monooxygenase activation protein, epsilon polypeptide	0.38595	0.63685	0.025922			4604.37
213655_at	7531		YWHAE	{UNVALIDATED HIT} Tyrosine 3-monooxygenase/tryptophan 5-monooxygenase activation protein, epsilon polypeptide	0.16076	0.79027	0.45464
210317_s_at	7531		YWHAE	Tyrosine 3-monooxygenase/tryptophan 5-monooxygenase activation protein, epsilon polypeptide	0.27281	0.84621	0.18081
214848_at	7534		YWHAZ	{ZERO PROBES MATCH} Tyrosine 3-monooxygenase/tryptophan 5-monooxygenase activation protein, zeta polypeptide	0.12655	0.72023	0.62121
200638_s_at	7534		YWHAZ	Tyrosine 3-monooxygenase/tryptophan 5-monooxygenase activation protein, zeta polypeptide	0.053877	0.88286	0.20557
200641_s_at	7534		YWHAZ	Tyrosine 3-monooxygenase/tryptophan 5-monooxygenase activation protein, zeta polypeptide	0.066771	0.76449	0.43949
217555_at	8243		SMC1A	Structural maintenance of chromosomes 1A	0.23542	0.23017	0.83441
204857_at	8379		MAD1L1	MAD1 mitotic arrest deficient-like 1 (yeast)	0.72803	0.22562	0.0072756			2504.37
216284_at	8555		CDC14B	{ZERO PROBES MATCH} CDC14 cell division cycle 14 homolog B (S. cerevisiae)	0.42918	0.34264	0.41157
205288_at	8556		CDC14A	CDC14 cell division cycle 14 homolog A (S. cerevisiae)	#N/A	#N/A	#N/A
210440_s_at	8556		CDC14A	CDC14 cell division cycle 14 homolog A (S. cerevisiae)	#N/A	#N/A	#N/A
210441_at	8556		CDC14A	CDC14 cell division cycle 14 homolog A (S. cerevisiae)	#N/A	#N/A	#N/A
210743_s_at	8556		CDC14A	CDC14 cell division cycle 14 homolog A (S. cerevisiae)	0.47865	0.16652	0.16089
202892_at	8697		CDC23	cell division cycle 23 homolog (S. cerevisiae)	0.18669	0.18835	0.78891
209658_at	8881		CDC16	{ZERO PROBES MATCH} cell division cycle 16 homolog (S. cerevisiae)	0.59923	0.066207	0.54829
202717_s_at	8881		CDC16	cell division cycle 16 homolog (S. cerevisiae)	0.59868	0.78277	0.53723
205899_at	8900		CCNA1	Cyclin A1	#N/A	#N/A	#N/A
201456_s_at	9184		BUB3	BUB3 budding uninhibited by benzimidazoles 3 homolog (yeast)	0.2374	0.051839	0.29205
201458_s_at	9184		BUB3	BUB3 budding uninhibited by benzimidazoles 3 homolog (yeast)	0.85731	0.25374	0.10787
207845_s_at	10393		ANAPC10	Anaphase promoting complex subunit 10	0.2034	0.052	0.66432
214557_at	10744		PTTG2	Pituitary tumor-transforming 2	#N/A	#N/A	#N/A
204121_at	10912		GADD45G	Growth arrest and DNA-damage-inducible, gamma	0.4734	0.17185	0.62121
210416_s_at	11200		CHEK2	CHK2 checkpoint homolog (S. pombe)	0.081727	0.73721	0.10787
218555_at	29882		ANAPC2	Anaphase promoting complex subunit 2	0.83303	0.81779	0.41989
209415_at	51343		FZR1	fizzy/cell division cycle 20 related 1 (Drosophila)	0.31342	0.53032	0.59372
211865_s_at	51343		FZR1	fizzy/cell division cycle 20 related 1 (Drosophila)	0.69026	0.63218	0.63393
200098_s_at	51433		ANAPC5	Anaphase promoting complex subunit 5	0.5313	0.79369	0.42066
208721_s_at	51433		ANAPC5	Anaphase promoting complex subunit 5	0.56061	0.59482	0.62178
208722_s_at	51433		ANAPC5	Anaphase promoting complex subunit 5	0.37164	0.61949	0.38214
211036_x_at	51433		ANAPC5	Anaphase promoting complex subunit 5	0.32693	0.64451	0.48175
218575_at	64682		ANAPC1	Anaphase promoting complex subunit 1	0.15572	0.093905	0.010891			6944.37
211348_s_at	168448, 8555		CDC14B	{ZERO PROBES MATCH} CDC14 cell division cycle 14 homolog B (S. cerevisiae)	#N/A	#N/A	#N/A
